# Supplementary material for: Demographic modelling of haemoglobinopathies incidence in Germany: A call for targeted public health policy responses
Source: Research Square preprint supplement (doi:10.21203/rs.3.rs-7935231/v1), 2026-01-13
Supplement: Supplementary file 1 [file 01ee7a60b621301a61d14a65.docx]

**SUPPLEMENTARY MATERIAL**

**Table of contents Page**

| Data sources | 2 |
| --- | --- |
| Applied equations | 3 |

**Data sources:**

Used sources to analyze the risk of carrying haemoglobinopathies in pregnancy in Germany and the German federal states (figures and supplementary tables):

1. Number of women in childbearing age in Germany and in German federal states by country-of-origin:

online database of the German Federal Statistical Office (GENESIS): https://www-genesis.destatis.de/genesis/online. Table number: 12521-0022. Title: “*Ausländer: Bundesländer, Stichtag, Geschlecht, Altersjahre, Ländergruppierungen/Staatsangehörigkeit*”. Access date: 18.07.2025. Table number: 12411-0006. Title: “ *Bevölkerung: Deutschland, Stichtag, Altersjahre, Nationalität/Geschlecht/Familienstand*”. Access date: 28.08.2025. Table number: 12411-0013. Title: “*Bevölkerung: Bundesländer, Stichtag, Geschlecht, Altersjahre*”. Access date: 28.08.2025

1. Number of live births in Germany and in German federal states by mother’s nationality (German / Non-German):

online database of the German Federal Statistical Office (GENESIS): https://www-genesis.destatis.de/genesis/online. Table number: 12612-0103. Title: “ *Lebendgeborene: Bundesländer, Jahre, Staatsangehörigkeit des Kindes und der Eltern*”. Access date: 26.08.2025

1. Haemoglobinopathies carrier frequencies among pregnancies in countries-of-origin:

online database “Modell's Haemoglobinopathologist's Almanac”, a dataset based on supplementary materials for: Modell B & Darlison M. Global epidemiology of haemoglobin disorders and derived service indicators. Bulletin of the World Health Organisation 2008 Jun; 86(6): 480-7: http://www.modell-almanac.net/. Title: “Data table in Excel format”. Data used for our analysis were included in “DEMO sheet”, column name “Total % carrying significant variants (allowing for a/b coincidence)”. Access date: 21.08.2025

1. Fertility rates for women by country-of-origin:

online database of the World Bank: https://data.worldbank.org/indicator/SP.DYN.TFRT.IN. Title: “Fertility rate, total (births per women)”. Access date: 22.08.2025

1. Number of total German population and the population with migration background in Germany in 2024:

online database of the German Federal Statistical Office (GENESIS): https://www-genesis.destatis.de/genesis/online. Table number: 12211-0202. Title: “*Personen mit Migrationshintergrund (i.w.S.) aus Hauptwohnsitzhaushalten: Deutschland, Jahre, Geschlecht, Geburtsland bzw. Geburtsland der Eltern*”. Access date: 05.09.2025

**Applied equations:**

Used equations to calculate the estimated proportions of pregnant women at risk for carrying a haemoglobinopathy at federal state and national level:

1. Estimated annual proportion of pregnant women at risk of carrying a significant haemoglobin variant
2. Estimated annual proportion of pregnant women at risk of carrying any haemoglobin variant
3. Estimated annual proportion of pregnant women at risk of carrying a significant haemoglobin variant, adjusted to fertility rate in country-of-origin
4. Estimated annual proportion of pregnant women at risk of carrying any haemoglobin variant, adjusted to fertility rate in country-of-origin

| : | number of women of childbearing age (15-50 years) from a given country-of-origin () in a given German federal state or in Germany and in a given year (2010-2024) |
| --- | --- |
| : | number of all non-German women of childbearing age (15-50 years) in a given German federal state or in Germany and in a given year (2010-2024) |
| : | number of all women of childbearing age (15-50 years) in a given German federal state or in Germany and in a given year (2010-2024) |
| : | carrier frequency of significant variants among pregnant women in country () according to „Modell's Haemoglobinopathologist's Almanac“ [URL: <http://www.modell-almanac.net/>; DEMO Excel Sheet, results in column: “Total % carrying significant variants (allowing for a/b coincidence)”]. If relevant for stratification, carrier frequency of single significant variants among pregnant women in country () were included instead of all significant variants (e.g., results in column: “% AC”, “% AS”, or “% beta thal” …etc.). |
| : | carrier frequency of all variants among pregnant in country () according to „Modell's Haemoglobinopathologist's Almanac“ [URL: <http://www.modell-almanac.net/>; DEMO Excel Sheet, column: “total % carrying one or more variants (incl harmless combinations)”]. |
| : | number of live births from non-German mothers in a given German federal state or in Germany and in a given year (2010-2024) |
| : | total number of live births in a given German federal state or in Germany and in a given year (2010-2024) |
|  | total fertility rate in country () |
| : | themedian value of all total fertility rates published for countries-of-origin (n= 208) of non-German women resident in Germany: Data on fertility rates in 2023 only available for 200 countries. Eight countries reported in the database of the Federal Statistical Office of Germany (GENESIS) had no updated fertility rates in the World Bank database (listed as “not applicable” = “n.a.” in the supplementary tables), so they were not included in our estimations |
