# Supplementary material for: Demographic modelling of haemoglobinopathies incidence in Germany: A call for targeted public health policy responses
Source: Research Square preprint supplement (doi:10.21203/rs.3.rs-7935231/v1), 2026-01-13
Supplement: Supplementary file 2 [file bb313726c5d975989fadec29.xlsx]

## Sheet: Table of contents
Table of contents
Table S1	Number of resident non-German women in childbearing age in Germany per year, total fertility rate, and proportion of pregnancies carrying haemoglobin variants by country-of-origin
Table S2	Number of resident non-German women in childbearing age in Baden-Württemberg per year, total fertility rate, and proportion of pregnancies carrying haemoglobin variants by country-of-origin
Table S3	Number of resident non-German women in childbearing age in Bavaria per year, total fertility rate, and proportion of pregnancies carrying haemoglobin variants by country-of-origin
Table S4	Number of resident non-German women in childbearing age in Berlin per year, total fertility rate, and proportion of pregnancies carrying haemoglobin variants by country-of-origin
Table S5	Number of resident non-German women in childbearing age in Brandenburg per year, total fertility rate, and proportion of pregnancies carrying haemoglobin variants by country-of-origin
Table S6	Number of resident non-German women in childbearing age in Bremen per year, total fertility rate, and proportion of pregnancies carrying haemoglobin variants by country-of-origin
Table S7	Number of resident non-German women in childbearing age in Hamburg per year, total fertility rate, and proportion of pregnancies carrying haemoglobin variants by country-of-origin
Table S8	Number of resident non-German women in childbearing age in Hesse per year, total fertility rate, and proportion of pregnancies carrying haemoglobin variants by country-of-origin
Table S9	Number of resident non-German women in childbearing age in Mecklenburg-Western Pomerania per year, total fertility rate, and proportion of pregnancies carrying haemoglobin variants by country-of-origin
Table S10	Number of resident non-German women in childbearing age in Lower-Saxony per year, total fertility rate, and proportion of pregnancies carrying haemoglobin variants by country-of-origin
Table S11	Number of resident non-German women in childbearing age in North Rhine-Westphalia per year, total fertility rate, and proportion of pregnancies carrying haemoglobin variants by country-of-origin
Table S12	Number of resident non-German women in childbearing age in Rhineland-Palatinate per year, total fertility rate, and proportion of pregnancies carrying haemoglobin variants by country-of-origin
Table S13	Number of resident non-German women in childbearing age in Saarland per year, total fertility rate, and proportion of pregnancies carrying haemoglobin variants by country-of-origin
Table S14	Number of resident non-German women in childbearing age in Saxony per year, total fertility rate, and proportion of pregnancies carrying haemoglobin variants by country-of-origin
Table S15	Number of resident non-German women in childbearing age in Saxony-Anhalt per year, total fertility rate, and proportion of pregnancies carrying haemoglobin variants by country-of-origin
Table S16	Number of resident non-German women in childbearing age in Schleswig-Holstein per year, total fertility rate, and proportion of pregnancies carrying haemoglobin variants by country-of-origin
Table S17	Number of resident non-German women in childbearing age in Thuringia per year, total fertility rate, and proportion of pregnancies carrying haemoglobin variants by country-of-origin
Table S18	Estimated proportion of pregnancies at risk of carrying a haemoglobinopathy in each state German (2010-2024)
Table S19	Estimated proportion of pregnancies at risk of carrying a haemoglobinopathy in Germany (2010-2024)
Table S20	Change in the estimated proportion of pregnancies at risk for carrying a haemoglobinopathy in each German state between 2010 and 2024
Table S21	Top 15 countries-of-origin of population with a migration background in 2024
Table S22	Regression analysis of the trend in the estimated proportion of pregnancies at risk of carrying a haemoglobinopathy in Germany (2010 – 2024)
Table S23	Summary of the pilot studies on newborn screening for SCD in Germany
Table S24	Estimated proportion of pregnancies at risk for carrying a haemoglobinopathy in each German state in 2024

## Sheet: S1
Germany	2010	2011	2012	2013	2014	2015	2016	2017	2018	2019	2020	2021	2022	2023	2024	TFR 2023	Cw FRF 20203	CF any alpha variant	CF A/ß-Thal.	CF A/HbC	CF A/HbS	CF A/HbE	CF other beta variants	CF any beta variant	CF, SV (a/b coincidence)	CF, AV (a/b coincidence)		significant variants	2010	2011	2012	2013	2014	2015	2016	2017	2018	2019	2020	2021	2022	2023	2024		all variants	2010	2011	2012	2013
Afghanistan	14649	15377	16119	16559	17812	25858	46655	47120	49385	51555	54240	63455	77480	84985	91535	4.84	2.44198	0.151944	0.03				0.0003	0.0303	0.0303	0.182244		Afghanistan	3.40674e-05	3.53619e-05	3.58702e-05	3.62185e-05	3.84347e-05	5.67935e-05	0.000111768	0.000107816	0.000113077	0.00011737	0.000121594	0.000137223	0.000159248	0.000181778	0.000200826		Afghanistan	0.000204903	0.000212689	0.000215747	0.000217842
Egypt	2939	3044	3323	3983	4492	4979	5670	6385	7205	8125	8555	9495	10695	11960	12690	2.75	1.38749	0.161989	0.02		0.002		0.0003	0.0223	0.0223	0.184289		Egypt	5.03028e-06	5.15194e-06	5.44237e-06	6.41164e-06	7.13366e-06	8.04838e-06	9.99686e-06	1.07523e-05	1.21416e-05	1.36136e-05	1.41148e-05	1.51118e-05	1.61781e-05	1.88275e-05	2.04907e-05		Egypt	4.15708e-05	4.25761e-05	4.49763e-05	5.29864e-05
Albania	3770	3980	4456	5339	8197	20094	15670	15500	17805	21265	24020	28380	33570	37825	39335	1.348	0.680121	0.0879363	0.05	0	0.03	0	0.0003	0.0803	0.0803	0.168236		Albania	2.32351e-05	2.4256e-05	2.62793e-05	3.09478e-05	4.68747e-05	0.000116962	9.94856e-05	9.39899e-05	0.000108042	0.000128299	0.000142705	0.000162647	0.000182856	0.000214413	0.00022871		Albania	4.86798e-05	5.08187e-05	5.50577e-05	6.48386e-05
Algeria	2909	3015	3138	3300	3388	3625	3685	3745	3920	4095	4120	4400	4910	5490	6330	2.766	1.39556	0.346633	0.035	0.012	0.009		0.0003	0.0563	0.0563	0.402933		Algeria	1.25701e-05	1.2883e-05	1.29752e-05	1.34115e-05	1.35837e-05	1.47937e-05	1.64029e-05	1.59219e-05	1.66775e-05	1.73223e-05	1.71615e-05	1.76798e-05	1.87513e-05	2.18191e-05	2.58049e-05		Algeria	8.9963e-05	9.22021e-05	9.28621e-05	9.59844e-05
Andorra	5	6	7	6	5	7	15	25	10	10	10	10	10	5	5	1.082	0.545913	0	0.001				0.0003	0.0013	0.0013	0.0013		Andorra	4.98886e-10	5.91992e-10	6.68335e-10	5.63052e-10	4.62893e-10	6.59634e-10	1.54174e-09	2.45424e-09	9.82378e-10	9.76758e-10	9.61818e-10	9.27813e-10	8.81832e-10	4.58849e-10	4.70655e-10		Andorra	4.98886e-10	5.91992e-10	6.68335e-10	5.63052e-10
Angola	1916	1872	1862	1863	1771	1718	1570	1565	1505	1525	1540	1520	1590	1725	1900	5.124	2.58527	0.406157	0.00075		0.247		0.0003	0.24805	0.24805	0.654207		Angola	3.64773e-05	3.52424e-05	3.39213e-05	3.33585e-05	3.12842e-05	3.08904e-05	3.07903e-05	2.93149e-05	2.82105e-05	2.84219e-05	2.82624e-05	2.69091e-05	2.67534e-05	3.02054e-05	3.41258e-05		Angola	9.62052e-05	9.29484e-05	8.94639e-05	8.79796e-05
Antigua and Barbuda	3	3	3	3	3	4	0	0	0	0	0	0	0	0	0	1.578	0.796165	0.213231	0.01	0.02	0.1		0.0003	0.1303	0.1303	0.343531		Antigua and Barbuda	3.00022e-08	2.96679e-08	2.8709e-08	2.82176e-08	2.78377e-08	3.77803e-08	0	0	0	0	0	0	0	0	0		Antigua and Barbuda	7.90997e-08	7.82182e-08	7.56903e-08	7.43945e-08
Equatorial Guinea	37	37	37	39	41	44	10	10	10	10	5	10	15	15	15	4.081	2.05903	0.4071	0.00075		0.2		0.0003	0.20105	0.20105	0.60815		Equatorial Guinea	5.70944e-07	5.64582e-07	5.46335e-07	5.66008e-07	5.87024e-07	6.41236e-07	1.58957e-07	1.51823e-07	1.51929e-07	1.51059e-07	7.43744e-08	1.4349e-07	2.04568e-07	2.12889e-07	2.18366e-07		Equatorial Guinea	1.72703e-06	1.70779e-06	1.65259e-06	1.7121e-06
Argentina	1922	1940	1965	1896	1893	1920	1820	1920	2155	2380	2540	3010	3680	4025	4295	1.5	0.756811	0.0218768	0.01				0.0003	0.0103	0.0103	0.0321768		Argentina	1.51942e-06	1.51656e-06	1.48646e-06	1.40971e-06	1.38853e-06	1.43351e-06	1.48212e-06	1.49339e-06	1.67734e-06	1.84187e-06	1.93562e-06	2.21269e-06	2.57115e-06	2.92658e-06	3.20324e-06		Argentina	4.74662e-06	4.73768e-06	4.64364e-06	4.40388e-06
Armenia	3833	4070	4447	5032	5839	6749	8400	8905	9030	8990	8915	9055	10190	10650	10630	1.9	0.958628	0.019899	0.02				0.0003	0.0203	0.0203	0.040199		Armenia	5.97204e-06	6.27063e-06	6.63004e-06	7.37379e-06	8.44116e-06	9.93109e-06	1.34819e-05	1.3651e-05	1.38522e-05	1.3712e-05	1.33896e-05	1.3119e-05	1.40318e-05	1.52617e-05	1.5625e-05		Armenia	1.18261e-05	1.24174e-05	1.31291e-05	1.46019e-05
Azerbaijan	4154	4219	4321	4550	4859	5477	6685	7145	7560	7920	8045	8390	10010	11085	11715	1.55	0.782038	0.316272	0.054		0.006		0.0003	0.0603	0.0603	0.376572		Azerbaijan	1.92252e-05	1.93085e-05	1.91361e-05	1.98054e-05	2.08656e-05	2.39399e-05	3.18709e-05	3.25352e-05	3.44488e-05	3.58828e-05	3.58916e-05	3.61074e-05	4.09443e-05	4.71856e-05	5.11504e-05		Azerbaijan	0.000120061	0.000120581	0.000119505	0.000123684
Ethiopia	4161	4240	4375	4513	4737	5429	6095	6230	6415	6470	6435	6570	6675	6870	7100	3.989	2.01261	0.0198931	0.005	0	0.001		0.0003	0.0063	0.0063	0.0261931		Ethiopia	2.01199e-06	2.02734e-06	2.02428e-06	2.05239e-06	2.12526e-06	2.47926e-06	3.03592e-06	2.96389e-06	3.05403e-06	3.06259e-06	2.99943e-06	2.95408e-06	2.85256e-06	3.0553e-06	3.23883e-06		Ethiopia	8.36512e-06	8.42894e-06	8.41623e-06	8.53308e-06
Australia	2960	3271	3471	3577	3738	4013	4155	4260	4485	4455	4060	3815	3820	4005	4020	1.5	0.756811	0.0363039	0.00425757	8.18525e-05	0.00113573	0.00433954	5.97528e-05	0.00987444	0.0122397	0.0461784		Australia	2.78068e-06	3.03859e-06	3.12017e-06	3.16041e-06	3.2582e-06	3.56042e-06	4.02085e-06	3.93745e-06	4.14829e-06	4.09697e-06	3.6766e-06	3.33259e-06	3.17159e-06	3.46043e-06	3.56276e-06		Australia	1.0491e-05	1.14641e-05	1.17719e-05	1.19237e-05
Bahamas	17	17	15	17	15	17	0	0	0	0	0	0	0	0	0	1.373	0.692735	0.291373	0.01	0.03	0.14		0.0003	0.1803	0.1803	0.471673		Bahamas	2.35252e-07	2.3263e-07	1.98628e-07	2.21258e-07	1.92599e-07	2.22181e-07	0	0	0	0	0	0	0	0	0		Bahamas	6.15428e-07	6.0857e-07	5.19619e-07	5.7882e-07
Bahrain	31	29	42	58	79	102	25	25	35	40	45	40	45	50	50	1.824	0.920283	0.554856	0.029		0.138		0.0003	0.1673	0.167766	0.722156		Bahrain	3.99165e-07	3.69251e-07	5.17494e-07	7.02401e-07	9.43839e-07	1.24041e-06	3.31603e-07	3.16721e-07	4.43718e-07	5.04205e-07	5.58554e-07	4.78939e-07	5.12104e-07	5.92148e-07	6.07384e-07		Bahrain	1.71823e-06	1.58946e-06	2.22758e-06	3.02352e-06
Bangladesh	1533	1638	1729	1857	2012	2151	2225	2500	2900	3410	3695	4150	4785	5525	6390	2.163	1.09132	0.495591	0.025			0.04	0.0003	0.0653	0.0653	0.560891		Bangladesh	7.68322e-06	8.11798e-06	8.29203e-06	8.75344e-06	9.3564e-06	1.01816e-05	1.14873e-05	1.23278e-05	1.43102e-05	1.67306e-05	1.78516e-05	1.9341e-05	2.11952e-05	2.54684e-05	3.02137e-05		Bangladesh	6.59946e-05	6.9729e-05	7.1224e-05	7.51873e-05
Barbados	27	27	25	28	24	27	0	5	0	0	0	0	0	0	0	1.708	0.861756	0.151943	0.005	0.046	0.07		0.0003	0.1213	0.1213	0.273243		Barbados	2.51369e-07	2.48568e-07	2.22717e-07	2.45173e-07	2.07319e-07	2.37403e-07	0	4.57999e-08	0	0	0	0	0	0	0		Barbados	5.66241e-07	5.5993e-07	5.01698e-07	5.52282e-07
Belarus	10596	10800	11032	11243	11437	11785	12080	12305	12480	12635	12740	13020	13780	13945	12790	1.208	0.609485	0	0.001				0.0003	0.0013	0.0013	0.0013		Belarus	1.05724e-06	1.06558e-06	1.0533e-06	1.05507e-06	1.05882e-06	1.11054e-06	1.24161e-06	1.20798e-06	1.22601e-06	1.23413e-06	1.22536e-06	1.20801e-06	1.21516e-06	1.27973e-06	1.20394e-06		Belarus	1.05724e-06	1.06558e-06	1.0533e-06	1.05507e-06
Belgium	5917	5887	5967	6271	6386	6559	6510	7180	6820	6750	6735	6780	6860	6870	6765	1.47	0.741675	0.027938	0.00335428	0.000486604	0.00568933	0.000388821	0.0003	0.010219	0.0103997	0.0381571		Belgium	4.72291e-06	4.6466e-06	4.55753e-06	4.70773e-06	4.72952e-06	4.94447e-06	5.35275e-06	5.6387e-06	5.3597e-06	5.27434e-06	5.18212e-06	5.03231e-06	4.83935e-06	5.04353e-06	5.09423e-06		Belgium	1.73286e-05	1.70486e-05	1.67218e-05	1.72729e-05
Belize	10	14	13	14	16	15	0	0	0	0	0	0	0	0	0	2.007	1.01261	0.109808	0.00075	0.01	0.05		0.0003	0.06105	0.06105	0.170858		Belize	4.68569e-08	6.48686e-08	5.82884e-08	6.16975e-08	6.95622e-08	6.63802e-08	0	0	0	0	0	0	0	0	0		Belize	1.31136e-07	1.81545e-07	1.63129e-07	1.7267e-07
Benin	379	378	402	430	477	516	370	405	420	530	545	585	640	855	1025	4.556	2.29869	0.406157	0.002	0.102	0.228		0.0003	0.3323	0.3323	0.738457		Benin	9.66624e-06	9.53329e-06	9.81091e-06	1.03146e-05	1.1288e-05	1.24291e-05	9.72093e-06	1.01629e-05	1.05467e-05	1.32327e-05	1.33991e-05	1.3874e-05	1.44262e-05	2.00564e-05	2.46629e-05		Benin	2.14809e-05	2.11855e-05	2.18024e-05	2.29217e-05
Bhutan	33	36	29	34	34	38	0	0	0	0	5	10	5	5	5	1.462	0.737639	0.95976	0.00075			0.04	0.0003	0.04105	0.04105	1.00081		Bhutan	1.03972e-07	1.1216e-07	8.74307e-08	1.0075e-07	9.93939e-08	1.13073e-07	0	0	0	0	1.51856e-08	2.92975e-08	1.39228e-08	1.44891e-08	1.48619e-08		Bhutan	2.53486e-06	2.73448e-06	2.13158e-06	2.45632e-06
Bolivia, Plurinational State of	814	777	810	810	844	860	675	695	755	815	810	860	970	990	1060	2.547	1.28507	0.0590913	0.02				0.0003	0.0203	0.0203	0.0793913		Bolivia, Plurinational State of	1.26826e-06	1.19712e-06	1.20763e-06	1.18696e-06	1.22013e-06	1.26548e-06	1.08337e-06	1.06541e-06	1.15819e-06	1.24308e-06	1.21655e-06	1.24598e-06	1.3357e-06	1.41869e-06	1.55809e-06		Bolivia, Plurinational State of	4.96004e-06	4.68182e-06	4.72292e-06	4.64207e-06
Bosnia and Herzegovina	43599	43358	43591	43679	45381	46814	48215	50345	53555	56450	58600	61410	63690	66380	66735	1.486	0.749748	0.0198911	0.015				0.0003	0.0153	0.0153	0.0351911		Bosnia and Herzegovina	5.11983e-05	5.03479e-05	4.89825e-05	4.82412e-05	4.94462e-05	5.19193e-05	5.83243e-05	5.81677e-05	6.19194e-05	6.48932e-05	6.63343e-05	6.70575e-05	6.61006e-05	7.16945e-05	7.39324e-05		Bosnia and Herzegovina	0.00011776	0.000115804	0.000112663	0.000110958
Botswana	46	51	47	47	62	64	5	0	5	5	5	0	5	5	20	2.732	1.37841	0.124804	0.00075		0		0.0003	0.00105	0.00105	0.125854		Botswana	3.70711e-09	4.06425e-09	3.62443e-09	3.56239e-09	4.63606e-09	4.87114e-09	4.15083e-10	0	3.9673e-10	3.9446e-10	3.88426e-10	0	3.56124e-10	3.70609e-10	1.52058e-09		Botswana	4.44338e-07	4.87145e-07	4.34428e-07	4.26991e-07
Brazil	19529	19829	20047	20148	20570	20524	20880	21905	23060	24200	23940	24155	25995	26665	26765	1.619	0.816852	0.0596709	0.01	0.00616	0.02684		0.0003	0.0433	0.0433	0.102971		Brazil	6.49016e-05	6.51643e-05	6.37515e-05	6.29758e-05	6.34293e-05	6.44186e-05	7.14815e-05	7.16251e-05	7.54541e-05	7.87312e-05	7.6694e-05	7.46469e-05	7.6352e-05	8.15054e-05	8.3916e-05		Brazil	0.000154341	0.000154966	0.000151606	0.000149762
British Overseas Territories	0	0	0	221	203	189	95	95	65	85	95	105	75	80	80	n.a.		0.172628	0.01	0.02	0.08		0.0003	0.1103	0.1103	0.282928		British Overseas Territories	0	0	0	1.75963e-06	1.59455e-06	1.51112e-06	8.28466e-07	7.91286e-07	5.41782e-07	7.04431e-07	7.75262e-07	8.26574e-07	5.6115e-07	6.22906e-07	6.38933e-07		British Overseas Territories	0	0	0	4.51359e-06
Brunei Darussalam	14	16	16	14	21	15	0	0	0	0	0	0	0	0	0	1.747	0.881433	0.2431	0.03			0.01	0.0003	0.0403	0.0403	0.2834		Brunei Darussalam	4.33033e-08	4.8938e-08	4.73563e-08	4.07274e-08	6.02687e-08	4.38185e-08	0	0	0	0	0	0	0	0	0		Brunei Darussalam	3.0452e-07	3.44144e-07	3.33022e-07	2.86406e-07
Bulgaria	31329	36393	43245	50867	61255	74293	85005	98260	105490	111225	118455	124070	128525	130120	128420	1.81	0.913219	0	0.03				0.0003	0.0303	0.0303	0.0303		Bulgaria	7.2858e-05	8.36915e-05	9.62347e-05	0.000111258	0.000132176	0.000163174	0.00020364	0.00022483	0.00024154	0.000253215	0.000265549	0.000268304	0.000264163	0.000278319	0.000281751		Bulgaria	7.2858e-05	8.36915e-05	9.62347e-05	0.000111258
Burkina Faso	264	279	285	293	296	323	195	215	255	265	300	315	380	490	590	4.186	2.11201	0.405591	0.012	0.167	0.086		0.0003	0.2653	0.2653	0.670891		Burkina Faso	5.37563e-06	5.61775e-06	5.55309e-06	5.61124e-06	5.59238e-06	6.21157e-06	4.09023e-06	4.30735e-06	5.11226e-06	5.28235e-06	5.88854e-06	5.96437e-06	6.83854e-06	9.17678e-06	1.13339e-05		Burkina Faso	1.35939e-05	1.42062e-05	1.40427e-05	1.41897e-05
Burundi	142	125	118	118	128	130	50	40	45	55	50	55	490	595	595	4.878	2.46115	0.382204	0.00075		0.189		0.0003	0.19005	0.19005	0.572254		Burundi	2.0713e-06	1.80301e-06	1.64704e-06	1.61884e-06	1.73239e-06	1.79091e-06	7.513e-07	5.74066e-07	6.46273e-07	7.8537e-07	7.03052e-07	7.46015e-07	6.31694e-06	7.98255e-06	8.18794e-06		Burundi	6.23685e-06	5.429e-06	4.95934e-06	4.87444e-06
Cape Verde	88	84	81	87	92	95	5	0	0	0	5	5	15	15	20	1.522	0.767911	0.36	0.00075		0.042		0.0003	0.04305	0.04305	0.40305		Cape Verde	2.90766e-07	2.74456e-07	2.56101e-07	2.70362e-07	2.82052e-07	2.96455e-07	1.70184e-08	0	0	0	1.59255e-08	1.53624e-08	4.38033e-08	4.55849e-08	6.23437e-08		Cape Verde	2.72226e-06	2.56956e-06	2.39771e-06	2.53123e-06
Chile	2178	2182	2233	2240	2255	2369	2400	2555	2745	3015	3130	3275	3555	3840	4160	1.167	0.588799	0.0198931	0.01				0.0003	0.0103	0.0103	0.0301931		Chile	1.7218e-06	1.70574e-06	1.68919e-06	1.66548e-06	1.65406e-06	1.76874e-06	1.95445e-06	1.98729e-06	2.13656e-06	2.33329e-06	2.38523e-06	2.4075e-06	2.48382e-06	2.79206e-06	3.10256e-06		Chile	5.04723e-06	5.00015e-06	4.95164e-06	4.88213e-06
China	36967	39442	42858	46235	50339	54724	59170	62305	65470	67900	65440	65275	66235	68825	71385	0.999	0.504036	0.112521	0.0101174	0	0	0.000210548	0.0003	0.010628	0.0241609	0.123149		China	6.85511e-05	7.23257e-05	7.60497e-05	8.06375e-05	8.66133e-05	9.58411e-05	0.000113029	0.000113676	0.000119534	0.000123261	0.000116978	0.000112558	0.000108553	0.000117386	0.000124885		China	0.000349407	0.000368646	0.000387627	0.000411012
Costa Rica	364	365	386	399	444	486	330	385	405	500	535	590	720	730	790	1.33	0.671039	0.0446649	0.00075	0.002	0.02		0.0003	0.02305	0.02305	0.0677149		Costa Rica	6.43962e-07	6.38535e-07	6.53448e-07	6.63892e-07	7.28822e-07	8.12023e-07	6.01396e-07	6.7014e-07	7.05442e-07	8.65934e-07	9.12376e-07	9.70599e-07	1.12576e-06	1.18782e-06	1.31852e-06		Costa Rica	1.89179e-06	1.87585e-06	1.91966e-06	1.95034e-06
Côte d'Ivoire	867	858	901	970	1003	1144	1265	1375	1590	1660	1700	1830	2025	2665	2770	4.283	2.16095	0.389764	0.039	0.063	0.084		0.0003	0.1863	0.1863	0.576064		Côte d'Ivoire	1.23971e-05	1.21317e-05	1.23279e-05	1.30448e-05	1.3307e-05	1.5449e-05	1.86328e-05	1.93442e-05	2.23844e-05	2.32362e-05	2.34321e-05	2.43322e-05	2.55906e-05	3.50483e-05	3.73665e-05		Côte d'Ivoire	3.83334e-05	3.75127e-05	3.81196e-05	4.03363e-05
Denmark	5406	5437	5501	5625	5520	5578	5425	6815	5495	5205	5190	5085	4955	4705	4235	1.5	0.756811		0.00225396	8.50554e-05	0.000687419	0.000628425	0.0003	0.00395486	0.00417812	0.00395486		Denmark	1.73358e-06	1.7241e-06	1.68801e-06	1.69651e-06	1.64243e-06	1.68936e-06	1.79208e-06	2.15021e-06	1.73494e-06	1.63398e-06	1.60435e-06	1.51631e-06	1.40432e-06	1.38771e-06	1.28122e-06		Denmark	1.64095e-06	1.63197e-06	1.59781e-06	1.60586e-06
Dominica	86	90	102	97	100	93	20	15	20	25	25	15	15	10	5	1.484	0.748739	0.328911	0.0075	0.015	0.16		0.0003	0.1828	0.1828	0.511711		Dominica	1.2066e-06	1.24865e-06	1.3694e-06	1.27998e-06	1.3018e-06	1.23231e-06	2.89056e-07	2.07063e-07	2.76275e-07	3.43368e-07	3.38116e-07	1.95697e-07	1.85999e-07	1.29043e-07	6.61814e-08		Dominica	3.37762e-06	3.49533e-06	3.83335e-06	3.58303e-06
Dominican Republic	3616	3662	3668	3705	3650	3541	3365	3290	3110	3035	2970	2870	2795	2670	2520	2.243	1.13169	0.252813	0.01	0.03	0.12		0.0003	0.1603	0.1603	0.413113		Dominican Republic	4.44887e-05	4.45526e-05	4.31833e-05	4.28722e-05	4.16672e-05	4.11454e-05	4.26476e-05	3.98257e-05	3.76729e-05	3.65541e-05	3.52241e-05	3.28347e-05	3.03919e-05	3.02135e-05	2.92499e-05		Dominican Republic	0.000114653	0.000114817	0.000111289	0.000110487
Djibouti	26	23	24	28	33	40	0	0	0	5	10	0	5	25	50	2.609	1.31635	0.0196773	0.00075				0.0003	0.00105	0.00105	0.0207273		Djibouti	2.09532e-09	1.8329e-09	1.85077e-09	2.12227e-09	2.46758e-09	3.04446e-09	0	0	0	3.9446e-10	7.76853e-10	0	3.56124e-10	1.85305e-09	3.80145e-09		Djibouti	4.13621e-08	3.61818e-08	3.65347e-08	4.18942e-08
Ecuador	2377	2363	2407	2367	2303	2320	2200	2295	2335	2410	2355	2500	2685	2920	3140	1.823	0.919778	0.0224466	0.01		0.01		0.0003	0.0203	0.0203	0.0427466		Ecuador	3.70351e-06	3.64066e-06	3.5886e-06	3.46855e-06	3.32934e-06	3.41386e-06	3.53097e-06	3.51814e-06	3.58194e-06	3.67584e-06	3.53701e-06	3.62204e-06	3.69728e-06	4.18443e-06	4.61546e-06		Ecuador	7.79864e-06	7.66631e-06	7.55668e-06	7.30388e-06
El Salvador	248	287	300	314	351	413	315	355	420	485	530	675	765	825	960	1.775	0.89556	0.0340384	0.00075		0.0152		0.0003	0.01625	0.01625	0.0502884		El Salvador	3.09309e-07	3.53962e-07	3.58037e-07	3.6833e-07	4.06189e-07	4.8648e-07	4.04706e-07	4.35628e-07	5.15749e-07	5.9216e-07	6.37204e-07	7.82842e-07	8.43252e-07	9.46377e-07	1.12957e-06		El Salvador	9.57211e-07	1.09539e-06	1.10801e-06	1.13986e-06
Eritrea	2758	2845	2945	3642	6023	8993	13525	14840	15895	16305	16400	16905	17850	18515	19155	3.713	1.87336	0.0198931	0.005		0.001		0.0003	0.0063	0.0063	0.0261931		Eritrea	1.33359e-06	1.36033e-06	1.36263e-06	1.65628e-06	2.70222e-06	4.10683e-06	6.7368e-06	7.06006e-06	7.56722e-06	7.71801e-06	7.64423e-06	7.60104e-06	7.62819e-06	8.2342e-06	8.73801e-06		Eritrea	5.54458e-06	5.65574e-06	5.66532e-06	6.88621e-06
Estonia	2469	2643	2820	2995	3046	3120	3035	3355	3290	3270	3210	3105	3115	3090	2985	1.31	0.660949	0	0.001				0.0003	0.0013	0.0013	0.0013		Estonia	2.4635e-07	2.60772e-07	2.69244e-07	2.81057e-07	2.81995e-07	2.94008e-07	3.11945e-07	3.29359e-07	3.23202e-07	3.194e-07	3.08743e-07	2.88086e-07	2.74691e-07	2.83569e-07	2.80981e-07		Estonia	2.4635e-07	2.60772e-07	2.69244e-07	2.81057e-07
Eswatini	10	14	13	20	21	21	0	0	0	0	0	0	0	0	0	2.753	1.389	0.125125	0.00075		0.005		0.0003	0.00605	0.00605	0.131175		Eswatini	4.64348e-09	6.42842e-09	5.77633e-09	8.73452e-09	9.04779e-09	9.2095e-09	0	0	0	0	0	0	0	0	0		Eswatini	1.00679e-07	1.3938e-07	1.25241e-07	1.8938e-07
Fiji	132	176	183	199	200	153	125	125	120	110	60	50	50	35	10	2.281	1.15086	0.351975	0.00075				0.0003	0.00105	0.00105	0.353025		Fiji	1.06378e-08	1.40256e-08	1.41122e-08	1.50833e-08	1.4955e-08	1.16451e-08	1.03771e-08	9.91136e-09	9.52151e-09	8.67812e-09	4.66112e-09	3.74694e-09	3.56124e-09	2.59426e-09	7.6029e-10		Fiji	3.57657e-06	4.71562e-06	4.74471e-06	5.07122e-06
Finland	4368	4433	4482	4658	4686	4910	4955	5995	5180	4895	4640	4585	4515	4450	4310	1.26	0.635721	0.00254627	0.00132379	3.54355e-05	0.000261161	0.000288624	0.0003	0.00220901	0.00232607	0.00475527		Finland	7.79819e-07	7.82604e-07	7.65681e-07	7.82126e-07	7.76235e-07	8.27878e-07	9.1126e-07	1.05304e-06	9.10518e-07	8.55499e-07	7.98529e-07	7.61166e-07	7.12399e-07	7.30702e-07	7.25922e-07		Finland	1.59421e-06	1.59991e-06	1.56531e-06	1.59893e-06
France	36408	36827	37536	39151	39628	40596	41625	48390	44535	43560	43030	42425	41735	41165	39725	1.66	0.837538	0.0311626	0.00305514	0.000636213	0.00540286	0.00145195	0.0003	0.0108462	0.0110525	0.0420087		France	3.08848e-05	3.08921e-05	3.04692e-05	3.12361e-05	3.11911e-05	3.25241e-05	3.63739e-05	4.03878e-05	3.71961e-05	3.61736e-05	3.51869e-05	3.34657e-05	3.12898e-05	3.21178e-05	3.17917e-05		France	0.000117388	0.000117416	0.000115809	0.000118723
Gabon	130	131	126	125	131	147	40	50	50	60	40	40	50	55	45	3.647	1.84006	0.6864	0.00075	0.001	0.252		0.0003	0.25405	0.25405	0.94045		Gabon	2.53484e-06	2.52587e-06	2.35095e-06	2.29236e-06	2.37005e-06	2.70706e-06	8.03442e-07	9.59231e-07	9.59897e-07	1.14529e-06	7.51845e-07	7.25264e-07	8.61652e-07	9.86368e-07	8.27792e-07		Gabon	9.38354e-06	9.35035e-06	8.7028e-06	8.48593e-06
Gambia	726	758	814	888	981	1104	1140	1250	1315	1420	1540	1610	1755	2010	2120	4.006	2.02119	0.389764	0.00075	0.016	0.136		0.0003	0.15305	0.15305	0.542814		Gambia	8.52821e-06	8.80488e-06	9.14978e-06	9.8107e-06	1.06923e-05	1.2248e-05	1.37947e-05	1.4447e-05	1.52088e-05	1.63292e-05	1.74383e-05	1.75864e-05	1.82202e-05	2.17163e-05	2.34941e-05		Gambia	3.02465e-05	3.12278e-05	3.2451e-05	3.47951e-05
Georgia	7235	7460	7831	8383	8972	9915	10540	10885	11495	11920	12030	13030	15740	16905	15685	1.81	0.913219	0.019899	0.03				0.0003	0.0303	0.0303	0.050199		Georgia	1.68255e-05	1.71555e-05	1.74266e-05	1.83356e-05	1.93597e-05	2.17769e-05	2.52499e-05	2.49061e-05	2.63201e-05	2.71371e-05	2.69686e-05	2.81776e-05	3.23512e-05	3.61589e-05	3.44126e-05		Georgia	2.78754e-05	2.8422e-05	2.88712e-05	3.03773e-05
Ghana	8287	8264	8444	8528	8839	9080	9525	9755	10100	10545	10880	11365	12205	12860	13315	3.397	1.71393	0.405968	0.003	0.112	0.158		0.0003	0.2733	0.2733	0.679268		Ghana	0.00017383	0.000171416	0.000169489	0.000168244	0.000172032	0.000179882	0.000205816	0.000201327	0.000208591	0.000216536	0.000219998	0.00022168	0.000226266	0.000248106	0.000263494		Ghana	0.000432043	0.000426042	0.000421253	0.00041816
Grenada	9	11	12	13	13	16	0	0	0	0	0	0	0	0	0	1.487	0.750252	0.213231	0.01	0.02	0.1		0.0003	0.1303	0.1303	0.343531		Grenada	9.00067e-08	1.08782e-07	1.14836e-07	1.22276e-07	1.2063e-07	1.51121e-07	0	0	0	0	0	0	0	0	0		Grenada	2.37299e-07	2.868e-07	3.02761e-07	3.22376e-07
Greece	73199	74833	78703	83175	86157	88114	89280	91920	90970	89045	87750	85935	84240	82315	79825	1.32	0.665994	0.00957832	0.00468454	2.35023e-05	0.00245686	4.03832e-05	3.20226e-05	0.0072373	0.00727335	0.0168156		Greece	4.08627e-05	4.13094e-05	4.20416e-05	4.36698e-05	4.46265e-05	4.64559e-05	5.1341e-05	5.04869e-05	4.99998e-05	4.86618e-05	4.72205e-05	4.46089e-05	4.15619e-05	4.2264e-05	4.204e-05		Greece	9.44726e-05	9.55052e-05	9.7198e-05	0.000100962
Guatemala	248	266	285	294	311	320	160	205	200	250	270	305	395	410	405	2.311	1.16599	0.0336926	0.00075				0.0003	0.00105	0.00105	0.0347426		Guatemala	1.99861e-08	2.11979e-08	2.19779e-08	2.22839e-08	2.32551e-08	2.43557e-08	1.32827e-08	1.62546e-08	1.58692e-08	1.9723e-08	2.0975e-08	2.28563e-08	2.81338e-08	3.039e-08	3.07917e-08		Guatemala	6.61305e-07	7.01399e-07	7.27211e-07	7.37333e-07
Guinea	801	844	918	1093	1253	1382	1535	1850	2450	2880	3075	3355	3800	4565	5050	4.217	2.12765	0.405205	0.00075		0.227		0.0003	0.22805	0.22805	0.633255		Guinea	1.40201e-05	1.46081e-05	1.53754e-05	1.7993e-05	2.03493e-05	2.28454e-05	2.76767e-05	3.18593e-05	4.22213e-05	4.93476e-05	5.18829e-05	5.46059e-05	5.87836e-05	7.34899e-05	8.33895e-05		Guinea	3.89313e-05	4.05641e-05	4.26947e-05	4.99635e-05
Guinea-Bissau	73	78	88	103	131	147	120	135	140	160	195	200	210	240	260	3.836	1.93542	0.405205	0.00075	0.002	0.076		0.0003	0.07905	0.07905	0.484255		Guinea-Bissau	4.42907e-07	4.67969e-07	5.10902e-07	5.8775e-07	7.37464e-07	8.42327e-07	7.49996e-07	8.05879e-07	8.36306e-07	9.50311e-07	1.14048e-06	1.12836e-06	1.12607e-06	1.33928e-06	1.48821e-06		Guinea-Bissau	2.71322e-06	2.86675e-06	3.12975e-06	3.60052e-06
Guyana	34	32	30	30	31	33	0	0	0	0	0	0	0	0	0	2.412	1.21695	0.109685	0.00075	0.01	0.05		0.0003	0.06105	0.06105	0.170735		Guyana	1.59313e-07	1.48271e-07	1.34512e-07	1.32209e-07	1.34777e-07	1.46036e-07	0	0	0	0	0	0	0	0	0		Guyana	4.45543e-07	4.14662e-07	3.76181e-07	3.69741e-07
Haiti	163	173	172	178	184	194	50	40	75	80	75	55	75	85	80	2.656	1.34006	0.213231	0.01	0.03	0.1		0.0003	0.1403	0.1403	0.353531		Haiti	1.75523e-06	1.84215e-06	1.77231e-06	1.80273e-06	1.83841e-06	1.97297e-06	5.5463e-07	4.23791e-07	7.9516e-07	8.43318e-07	7.78517e-07	5.50728e-07	7.13775e-07	8.41848e-07	8.12713e-07		Haiti	4.42286e-06	4.64189e-06	4.4659e-06	4.54257e-06
Honduras	299	320	334	362	373	411	285	305	375	465	465	590	760	950	1045	2.5	1.26135	0.0336926	0.00075	0.0004	0.0016		0.0003	0.00305	0.00305	0.0367426		Honduras	6.99937e-08	7.40748e-08	7.48168e-08	7.97007e-08	8.1017e-08	9.08663e-08	6.87259e-08	7.0248e-08	8.64304e-08	1.06561e-07	1.04931e-07	1.28431e-07	1.57237e-07	2.04541e-07	2.30784e-07		Honduras	8.43197e-07	8.92362e-07	9.013e-07	9.60136e-07
Hong Kong	0	0	0	0	24	92	75	130	215	270	265	360	470	560	610	0.751	0.37891	0.201389	0.03				0.0003	0.0303	0.07727	0.231689		Hong Kong	0	0	0	0	1.32066e-07	5.153e-07	4.58192e-07	7.58557e-07	1.25541e-06	1.56754e-06	1.51498e-06	1.98532e-06	2.46349e-06	3.05461e-06	3.41295e-06		Hong Kong	0	0	0	0
India	13637	15028	16901	18820	21096	23902	27355	31045	36030	42650	45355	53100	66125	78985	92585	1.975	0.996468	0.495591	0.0156702	0	0.0193568	0.00972176	0.0003	0.0450487	0.0450487	0.54064		India	4.71508e-05	5.13812e-05	5.59175e-05	6.12006e-05	6.76784e-05	7.80509e-05	9.74304e-05	0.000105611	0.000122654	0.000144359	0.000151167	0.000170724	0.000202065	0.000251179	0.000302004		India	0.000565867	0.000616638	0.000671079	0.000734483
Indonesia	5589	5931	6464	7014	7524	7944	8395	8760	9325	9920	10155	10820	11925	13220	14015	2.127	1.07316	0.0784	0.039651	0	0	0.0187238	0.0003	0.0586748	0.0586748	0.137075		Indonesia	2.51695e-05	2.6412e-05	2.78552e-05	2.97079e-05	3.1439e-05	3.37872e-05	3.89447e-05	3.88142e-05	4.13463e-05	4.37328e-05	4.4084e-05	4.53102e-05	4.74627e-05	5.47571e-05	5.95436e-05		Indonesia	5.88003e-05	6.1703e-05	6.50747e-05	6.94029e-05
Iraq	19691	20717	21580	22078	22982	31270	51780	55930	59815	62745	64685	68835	71805	72870	71990	3.249	1.63925	0.231914	0.03		0.03		0.0003	0.0603	0.0603	0.292214		Iraq	9.11324e-05	9.48124e-05	9.557e-05	9.61017e-05	9.86899e-05	0.000136681	0.000246862	0.000254681	0.00027256	0.000284276	0.000288583	0.00029624	0.000293707	0.000310187	0.000314325		Iraq	0.000441628	0.000459461	0.000463133	0.000465709
Iran, Islamic Republic of	15187	15869	16912	18141	18948	21088	26895	29115	33295	36250	36800	39350	45025	50375	54425	1.695	0.855197	0.125064	0.03		0.01		0.0003	0.0403	0.0403	0.165364		Iran, Islamic Republic of	4.69748e-05	4.85373e-05	5.00556e-05	5.2774e-05	5.43796e-05	6.1603e-05	8.56943e-05	8.86045e-05	0.000101396	0.000109763	0.000109724	0.000113179	0.000123084	0.00014331	0.000158816		Iran, Islamic Republic of	0.000192753	0.000199164	0.000205394	0.000216549
Ireland	3192	3252	3301	3437	3520	3684	3665	4590	4160	4225	4205	4485	4610	4765	4675	1.5	0.756811	0.0113288	0.00141037	0.000200032	0.000962482	0.000135415	0.0003	0.0030083	0.00317552	0.0143371		Ireland	7.77975e-07	7.83766e-07	7.69863e-07	7.87859e-07	7.96022e-07	8.48e-07	9.20162e-07	1.10068e-06	9.9826e-07	1.00806e-06	9.87939e-07	1.01647e-06	9.93021e-07	1.06816e-06	1.07495e-06		Ireland	3.51247e-06	3.53861e-06	3.47584e-06	3.55709e-06
Iceland	453	474	486	467	475	474	325	325	260	270	270	300	295	285	250	1.59	0.80222	0	0.001				0.0003	0.0013	0.0013	0.0013		Iceland	4.51991e-08	4.67673e-08	4.64016e-08	4.38242e-08	4.39749e-08	4.46666e-08	3.34043e-08	3.19052e-08	2.55418e-08	2.63725e-08	2.59691e-08	2.78344e-08	2.6014e-08	2.61544e-08	2.35328e-08		Iceland	4.51991e-08	4.67673e-08	4.64016e-08	4.38242e-08
Israel	2597	2738	2880	3040	3289	3498	3630	3690	3800	3820	3640	3490	3570	3770	3900	2.85	1.43794	0.0591	0.005				0.0003	0.0053	0.0053	0.0644		Israel	1.05642e-06	1.10136e-06	1.12104e-06	1.16306e-06	1.24139e-06	1.34387e-06	1.5211e-06	1.47685e-06	1.52193e-06	1.52119e-06	1.42734e-06	1.32013e-06	1.28347e-06	1.4105e-06	1.49668e-06		Israel	1.28365e-05	1.33826e-05	1.36217e-05	1.41323e-05
Italy	133996	133815	135819	141813	147001	151734	154070	161545	160005	158140	155770	153510	150905	149185	145310	1.2	0.605449	0.00568991	0.0319977	0.000175553	0.00223009	7.49446e-05	0.0003	0.0347783	0.0348457	0.0404682		Italy	0.000358368	0.000353895	0.000347586	0.000356713	0.000364785	0.00038326	0.000424466	0.000425086	0.000421326	0.000414033	0.00040159	0.000381771	0.000356694	0.000366971	0.000366636		Italy	0.000416191	0.000410997	0.00040367	0.00041427
Jamaica	526	523	515	494	499	500	345	375	365	335	330	330	300	305	275	1.358	0.685166	0.251775	0.01	0.04	0.11		0.0003	0.1603	0.1603	0.412075		Jamaica	6.47153e-06	6.36291e-06	6.06309e-06	5.71629e-06	5.69642e-06	5.80985e-06	4.37248e-06	4.5394e-06	4.42142e-06	4.0348e-06	3.91378e-06	3.77541e-06	3.2621e-06	3.45136e-06	3.19195e-06		Jamaica	1.6636e-05	1.63568e-05	1.55861e-05	1.46946e-05
Japan	12702	13524	14119	14587	14746	14868	14900	15240	15470	15645	14140	14190	14465	14800	14590	1.2	0.605449	0	0.00075				0.0003	0.00105	0.00105	0.00105		Japan	1.02364e-06	1.07774e-06	1.0888e-06	1.10563e-06	1.10263e-06	1.13163e-06	1.23695e-06	1.20839e-06	1.22748e-06	1.23427e-06	1.09847e-06	1.06338e-06	1.03027e-06	1.097e-06	1.10926e-06		Japan	1.02364e-06	1.07774e-06	1.0888e-06	1.10563e-06
Yemen	520	568	607	699	809	954	945	1130	1460	1755	1800	1945	2170	2490	2720	4.59	2.31584	0.556721	0.0236		0.0095		0.0003	0.0334	0.0334	0.590121		Yemen	1.33302e-06	1.43984e-06	1.48898e-06	1.6853e-06	1.92426e-06	2.3097e-06	2.49548e-06	2.85009e-06	3.68498e-06	4.4042e-06	4.44804e-06	4.63642e-06	4.91642e-06	5.87087e-06	6.57817e-06		Yemen	2.35523e-05	2.54396e-05	2.63077e-05	2.97764e-05
Jordan	2253	2326	2456	2629	2778	3011	3120	3380	3625	3910	3940	4270	4705	5075	5180	2.639	1.33148	0.240555	0.035		0.0022		0.0003	0.0375	0.0375	0.278055		Jordan	6.48456e-06	6.62006e-06	6.76414e-06	7.11665e-06	7.41876e-06	8.18471e-06	9.25042e-06	9.57155e-06	1.02725e-05	1.10167e-05	1.09314e-05	1.14282e-05	1.19683e-05	1.34346e-05	1.40654e-05		Jordan	4.80817e-05	4.90865e-05	5.01548e-05	5.27686e-05
Yugoslavia, Federal Republic of (April 27, 1992-February 4, 2003)	15737	10343	8631	7827	7592	7554	7075	6585	6350	5820	5295	4735	4265	3770	3140	n.a.												Yugoslavia, Federal Republic of (April 27, 1992-February 4, 2003)																	Yugoslavia, Federal Republic of (April 27, 1992-February 4, 2003)
Yugoslavia, Socialist Federal Republic (until 04/26/1992)	0	0	0	0	0	0	0	0	0	0	0	0	0	0	0	n.a.												Yugoslavia, Socialist Federal Republic (until 04/26/1992)																	Yugoslavia, Socialist Federal Republic (until 04/26/1992)
Cambodia	413	432	457	484	498	510	385	415	400	450	450	460	475	480	520	2.579	1.30121	0.4228	0.03			0.3	0.0003	0.3303	0.343876	0.7531		Cambodia	1.09003e-05	1.12747e-05	1.15417e-05	1.20144e-05	1.21955e-05	1.27126e-05	1.04674e-05	1.07767e-05	1.03943e-05	1.16267e-05	1.14489e-05	1.12896e-05	1.108e-05	1.1652e-05	1.29478e-05		Cambodia	2.38721e-05	2.46921e-05	2.52768e-05	2.63119e-05
Cameroon	5488	5759	6084	6481	6902	7420	7895	8155	8865	9735	9865	10170	10860	12190	13790	4.322	2.18063	0.406346	0.002	0.003	0.2		0.0003	0.2053	0.2053	0.611646		Cameroon	8.64751e-05	8.9734e-05	9.17342e-05	9.60472e-05	0.000100909	0.000110422	0.000128149	0.000126429	0.000137532	0.000150165	0.000149843	0.000149014	0.000151238	0.000176665	0.000204995		Cameroon	0.000257633	0.000267342	0.000273301	0.000286151
Canada	4411	4651	4891	5133	5342	5571	5635	5825	6140	6245	5965	5985	6170	6420	6490	1.26	0.635721	0.0408197	0.00503104	0.000969899	0.00475696	0.00246564	0.000299766	0.0135233	0.0152271	0.054343		Canada	5.15518e-06	5.37509e-06	5.46977e-06	5.64214e-06	5.79282e-06	6.14912e-06	6.78403e-06	6.69805e-06	7.06517e-06	7.14488e-06	6.72014e-06	6.50429e-06	6.37303e-06	6.90098e-06	7.15571e-06		Canada	1.83979e-05	1.91828e-05	1.95207e-05	2.01358e-05
Kazakhstan	21515	20536	19593	18833	18286	17801	17485	17255	17070	16890	16430	16260	16135	15800	15045	3.012	1.51968	0.0687378	0.00075				0.0003	0.00105	0.00105	0.0697878		Kazakhstan	1.73388e-06	1.63654e-06	1.51093e-06	1.42746e-06	1.36734e-06	1.35486e-06	1.45154e-06	1.36816e-06	1.35444e-06	1.33249e-06	1.27637e-06	1.2185e-06	1.14921e-06	1.17113e-06	1.14386e-06		Kazakhstan	0.000115242	0.000108772	0.000100423	9.48753e-05
Qatar	73	88	131	203	243	258	180	135	220	185	85	190	190	140	135	1.729	0.872351	0.231914	0.03		0.03		0.0003	0.0603	0.0603	0.292214		Qatar	3.37853e-07	4.02736e-07	5.80152e-07	8.83623e-07	1.0435e-06	1.12771e-06	8.58154e-07	6.14731e-07	1.00248e-06	8.38171e-07	3.79215e-07	8.17689e-07	7.77165e-07	5.9594e-07	5.89442e-07		Qatar	1.63724e-06	1.95166e-06	2.81142e-06	4.28204e-06
Kenya	6086	6164	6383	6426	6435	6547	6590	6675	6855	6965	6780	6865	7145	7620	7795	3.208	1.61857	0.406911	0.0015		0.1666		0.0003	0.1684	0.1684	0.575311		Kenya	7.86614e-05	7.87817e-05	7.89441e-05	7.81154e-05	7.71717e-05	7.99182e-05	8.77411e-05	8.48843e-05	8.72338e-05	8.81266e-05	8.44736e-05	8.25087e-05	8.16182e-05	9.05845e-05	9.50491e-05		Kenya	0.000268734	0.000269145	0.0002697	0.000266869
Kyrgyzstan	3999	4008	3932	3895	3813	3720	3560	3600	3835	3940	3895	4235	4930	5335	5505	2.7	1.36226	0.0678496	0.00075				0.0003	0.00105	0.00105	0.0688996		Kyrgyzstan	3.22276e-07	3.19402e-07	3.03219e-07	2.95223e-07	2.85117e-07	2.83135e-07	2.95539e-07	2.85447e-07	3.04292e-07	3.10835e-07	3.02584e-07	3.17366e-07	3.51139e-07	3.9544e-07	4.18539e-07		Kyrgyzstan	2.11473e-05	2.09587e-05	1.98968e-05	1.93722e-05
Kiribati	7	6	6	5	5	4	0	0	0	0	0	0	0	0	0	3.147	1.58779	0.0199	0.00075				0.0003	0.00105	0.00105	0.02095		Kiribati	5.64125e-10	4.78147e-10	4.62694e-10	3.78977e-10	3.73875e-10	3.04446e-10	0	0	0	0	0	0	0	0	0		Kiribati	1.12556e-08	9.54017e-09	9.23184e-09	7.5615e-09
Colombia	5660	5977	6326	6664	6891	7171	7465	8010	8900	10000	10120	11015	12905	15105	16510	1.645	0.82997	0.0759438	0.00860084	0.0254645	0.0328902	0.000187691	0.0003	0.0674432	0.0701326	0.143387		Colombia	3.04666e-05	3.18144e-05	3.25838e-05	3.37372e-05	3.44168e-05	3.64553e-05	4.13929e-05	4.24216e-05	4.71678e-05	5.26943e-05	5.2511e-05	5.51343e-05	6.13933e-05	7.47821e-05	8.38411e-05		Colombia	6.22894e-05	6.5045e-05	6.6618e-05	6.89761e-05
Comoros	11	13	13	13	18	21	0	0	0	0	0	0	0	0	0	3.878	1.95661	0.234375	0.01		0.008		0.0003	0.0183	0.0183	0.252675		Comoros	1.54501e-08	1.80557e-08	1.74722e-08	1.71731e-08	2.3458e-08	2.78568e-08	0	0	0	0	0	0	0	0	0		Comoros	2.13326e-07	2.49302e-07	2.41245e-07	2.37115e-07
Congo, Democratic Republic	3528	3450	3465	3347	3286	3149	2855	2775	2680	2580	2465	2475	2720	2800	2870	6.051	3.05298	0.690864	0.00075		0.186		0.0003	0.18705	0.18705	0.877914		Congo, Democratic Republic	5.06494e-05	4.89776e-05	4.76008e-05	4.51926e-05	4.37716e-05	4.26964e-05	4.22221e-05	3.91972e-05	3.78816e-05	3.62594e-05	3.41133e-05	3.30408e-05	3.45119e-05	3.6972e-05	3.88713e-05		Congo, Democratic Republic	0.000237721	0.000229875	0.000223413	0.00021211
Congo, Republic	543	514	496	524	505	508	405	425	350	375	345	375	425	430	420	4.157	2.09738	0.690864	0.00075		0.251		0.0003	0.25205	0.25205	0.942914		Congo, Republic	1.05045e-05	9.83265e-06	9.18166e-06	9.53393e-06	9.06454e-06	9.28136e-06	8.07081e-06	8.08928e-06	6.66638e-06	7.10169e-06	6.43362e-06	6.74582e-06	7.26638e-06	7.65089e-06	7.66524e-06		Congo, Republic	3.9297e-05	3.67838e-05	3.43484e-05	3.56662e-05
Korea, Democratic People's Republic	444	416	386	392	354	356	220	185	130	45	20	35	20	20	15	1.78	0.898083	0	0.00075				0.0003	0.00105	0.00105	0.00105		Korea, Democratic People's Republic	3.57816e-08	3.31515e-08	2.97666e-08	2.97118e-08	2.64704e-08	2.70957e-08	1.82636e-08	1.46688e-08	1.0315e-08	3.55014e-09	1.55371e-09	2.62286e-09	1.4245e-09	1.48244e-09	1.14043e-09		Korea, Democratic People's Republic	3.57816e-08	3.31515e-08	2.97666e-08	2.97118e-08
Korea, Republic	10493	10992	11541	12143	12714	13522	14335	15425	16270	17295	16025	16200	17070	17760	18170	0.721	0.363774	0	0.00075				0.0003	0.00105	0.00105	0.00105		Korea, Republic	8.45623e-07	8.75965e-07	8.89991e-07	9.20384e-07	9.5069e-07	1.02918e-06	1.19004e-06	1.22306e-06	1.29096e-06	1.36444e-06	1.24491e-06	1.21401e-06	1.21581e-06	1.3164e-06	1.38145e-06		Korea, Republic	8.45623e-07	8.75965e-07	8.89991e-07	9.20384e-07
Kosovo	35195	44956	52183	56952	61141	67569	66175	67455	69915	73675	77045	84155	88405	92765	95640	1.545	0.779516											Kosovo																	Kosovo
Croatia	58101	58600	58874	62568	68116	76989	86035	94985	102375	106385	108545	109415	108320	106340	102955	1.46	0.73663	0.0198911	0.005				0.0003	0.0053	0.0053	0.0251911		Croatia	2.36345e-05	2.35719e-05	2.29167e-05	2.39377e-05	2.57094e-05	2.95778e-05	3.60518e-05	3.80159e-05	4.1002e-05	4.23643e-05	4.25633e-05	4.13876e-05	3.89428e-05	3.97859e-05	3.95105e-05		Croatia	0.000112336	0.000112038	0.000108924	0.000113777
Cuba	4726	4672	4620	4515	4382	4289	4000	3825	3740	3575	3380	3280	3345	3480	3075	1.439	0.726034	0.251775	0.005	0.017	0.083		0.0003	0.1053	0.1053	0.357075		Cuba	3.81953e-05	3.73381e-05	3.57292e-05	3.43194e-05	3.28601e-05	3.27375e-05	3.33015e-05	3.04154e-05	2.97602e-05	2.82845e-05	2.63326e-05	2.46501e-05	2.38928e-05	2.58681e-05	2.34457e-05		Cuba	0.000129521	0.000126614	0.000121159	0.000116378
Kuwait	135	143	167	198	383	645	790	645	650	420	375	360	375	395	360	1.524	0.76892	0.23198	0.00075		0.04		0.0003	0.04105	0.04105	0.27303		Kuwait	4.25339e-07	4.45523e-07	5.0348e-07	5.86722e-07	1.11964e-06	1.91926e-06	2.56399e-06	1.99943e-06	2.01633e-06	1.29541e-06	1.13892e-06	1.05471e-06	1.04421e-06	1.14464e-06	1.07005e-06		Kuwait	2.82899e-06	2.96324e-06	3.34872e-06	3.90237e-06
Laos, People's Democratic Republic	417	437	437	442	452	457	345	330	335	365	365	350	350	355	315	2.421	1.22149	0.407512	0.0204	0	0	0.272	0.0003	0.2927	0.301158	0.700212		Laos, People's Democratic Republic	9.63869e-06	9.98841e-06	9.66559e-06	9.60883e-06	9.69394e-06	9.97635e-06	8.21465e-06	7.50485e-06	7.62385e-06	8.25906e-06	8.13273e-06	7.5228e-06	7.14998e-06	7.54709e-06	6.86902e-06		Laos, People's Democratic Republic	2.24106e-05	2.32237e-05	2.24731e-05	2.23412e-05
Lesotho	22	23	19	19	18	20	0	0	0	0	0	0	0	5	5	2.694	1.35923	0.12448	0.00075				0.0003	0.00105	0.00105	0.12553		Lesotho	1.77296e-09	1.8329e-09	1.4652e-09	1.44011e-09	1.34595e-09	1.52223e-09	0	0	0	0	0	0	0	3.70609e-10	3.80145e-10		Lesotho	2.11963e-07	2.19128e-07	1.75168e-07	1.7217e-07
Latvia	6576	7877	8963	9976	10655	11201	11635	13100	13080	13325	13495	13360	13305	13240	12820	1.36	0.686176	0	0.001				0.0003	0.0013	0.0013	0.0013		Latvia	6.56135e-07	7.77186e-07	8.55755e-07	9.36168e-07	9.86426e-07	1.05551e-06	1.19587e-06	1.28602e-06	1.28495e-06	1.30153e-06	1.29797e-06	1.23956e-06	1.17328e-06	1.21503e-06	1.20676e-06		Latvia	6.56135e-07	7.77186e-07	8.55755e-07	9.36168e-07
Lebanon	10085	9884	9863	9847	9780	9992	10675	10650	10560	10625	10470	10755	11305	11655	11830	2.239	1.12967	0.0296036	0.03		0.01		0.0003	0.0403	0.0403	0.0699036		Lebanon	3.11938e-05	3.02314e-05	2.91922e-05	2.86459e-05	2.8068e-05	2.9189e-05	3.40133e-05	3.24107e-05	3.21591e-05	3.2172e-05	3.12177e-05	3.09337e-05	3.09042e-05	3.31569e-05	3.45207e-05		Lebanon	5.41082e-05	5.24389e-05	5.06363e-05	4.96887e-05
Liberia	224	196	184	168	164	172	65	85	105	105	120	140	170	260	315	3.95	1.99294	0.406628	0.077	0.009	0.055		0.0003	0.1413	0.1413	0.547928		Liberia	2.42928e-06	2.10193e-06	1.90947e-06	1.71358e-06	1.65026e-06	1.7617e-06	7.26158e-07	9.06975e-07	1.12116e-06	1.11474e-06	1.25451e-06	1.41185e-06	1.62942e-06	2.59342e-06	3.22287e-06		Liberia	9.42019e-06	8.15081e-06	7.40448e-06	6.64488e-06
Libya	1016	1089	1494	2161	2511	2556	2560	2615	2615	2740	2630	2530	2800	2985	3025	2.355	1.18819	0.345434	0.003	0.002	0.02		0.0003	0.0253	0.0253	0.370734		Libya	1.97289e-06	2.09107e-06	2.77603e-06	3.94666e-06	4.52413e-06	4.68752e-06	5.12078e-06	4.99604e-06	4.99951e-06	5.20853e-06	4.92295e-06	4.56834e-06	4.80531e-06	5.33116e-06	5.54161e-06		Libya	2.89097e-05	3.06415e-05	4.06785e-05	5.78323e-05
Liechtenstein	72	68	72	73	77	79	5	5	0	0	0	0	5	5	15	1.45	0.731584	0	0.001				0.0003	0.0013	0.0013	0.0013		Liechtenstein	7.18396e-09	6.70924e-09	6.87431e-09	6.85047e-09	7.12856e-09	7.44444e-09	5.13912e-10	4.90849e-10	0	0	0	0	4.40916e-10	4.58849e-10	1.41197e-09		Liechtenstein	7.18396e-09	6.70924e-09	6.87431e-09	6.85047e-09
Lithuania	13190	14484	15868	16974	17665	18538	19335	20710	21355	21585	21445	21090	20660	20200	19340	1.18	0.595358	0	0.001				0.0003	0.0013	0.0013	0.0013		Lithuania	1.31606e-06	1.42907e-06	1.51502e-06	1.59287e-06	1.6354e-06	1.7469e-06	1.9873e-06	2.03309e-06	2.09787e-06	2.10833e-06	2.06262e-06	1.95676e-06	1.82187e-06	1.85375e-06	1.8205e-06		Lithuania	1.31606e-06	1.42907e-06	1.51502e-06	1.59287e-06
Luxembourg	3647	3748	3874	4265	4556	4953	5295	5805	6035	6345	6825	7020	7225	7375	7475	1.25	0.630676	0.0163591	0.00471612	0.000117695	0.00144637	1.38947e-05	0.0003	0.00659408	0.00676816	0.0229532		Luxembourg	1.8945e-06	1.92527e-06	1.92567e-06	2.08374e-06	2.19595e-06	2.42996e-06	2.83343e-06	2.96693e-06	3.08662e-06	3.2266e-06	3.41761e-06	3.39097e-06	3.31704e-06	3.52362e-06	3.66329e-06		Luxembourg	6.42491e-06	6.52926e-06	6.53065e-06	7.0667e-06
Macau	0	0	0	0	0	5	0	0	0	0	0	0	0	0	0	0.586	0.295661	0.201389	0.03				0.0003	0.0303	0.07727	0.231689		Macau	0	0	0	0	0	2.80054e-08	0	0	0	0	0	0	0	0	0		Macau	0	0	0	0
Madagascar	467	545	628	724	830	1034	1190	1515	1850	2115	2295	2690	3055	3615	4700	3.972	2.00404	0.359148	0.0015		0.11695		0.0003	0.11875	0.11875	0.477898		Madagascar	4.25637e-06	4.91193e-06	5.47706e-06	6.20623e-06	7.01909e-06	8.90055e-06	1.11727e-05	1.35857e-05	1.66013e-05	1.88708e-05	2.01636e-05	2.27984e-05	2.46087e-05	3.0304e-05	4.04132e-05		Madagascar	1.71293e-05	1.97676e-05	2.20419e-05	2.49763e-05
Malawi	65	68	65	71	72	67	20	20	15	25	10	10	35	60	65	3.648	1.84057	0.381308	0.0015	0	0.049	0	0.0003	0.0508	0.0508	0.432108		Malawi	2.53434e-07	2.62176e-07	2.4251e-07	2.60361e-07	2.60474e-07	2.46717e-07	8.03284e-08	7.67234e-08	5.75825e-08	9.54218e-08	3.75849e-08	3.62561e-08	1.20607e-07	2.15165e-07	2.39093e-07		Malawi	2.15573e-06	2.23009e-06	2.06281e-06	2.21465e-06
Malaysia	1609	1598	1629	1671	1713	1774	1750	1795	1990	2060	2015	2095	2320	2425	2575	1.55	0.782038	0.264308	0.0165802	0	0	0.0550568	0.0003	0.071937	0.0877329	0.336245		Malaysia	1.08344e-05	1.06405e-05	1.04963e-05	1.05826e-05	1.07026e-05	1.12818e-05	1.21388e-05	1.18922e-05	1.31932e-05	1.35792e-05	1.30794e-05	1.31179e-05	1.38068e-05	1.50187e-05	1.6358e-05		Malaysia	4.1524e-05	4.07805e-05	4.02281e-05	4.05588e-05
Maldives	14	14	12	13	12	15	0	0	0	0	0	0	0	0	0	1.575	0.794652	0.496	0.1734		0.0014	0.0097	0.003	0.1875	0.1875	0.6835		Maldives	2.01473e-07	1.99228e-07	1.65248e-07	1.75954e-07	1.60232e-07	2.0387e-07	0	0	0	0	0	0	0	0	0		Maldives	7.34437e-07	7.26252e-07	6.02383e-07	6.4141e-07
Mali	164	167	188	206	215	224	150	165	180	200	205	235	220	300	350	5.614	2.83249	0.357751	0.00288849	0.0856586	0.147578		0.0003	0.236426	0.236426	0.594176		Mali	2.97595e-06	2.99662e-06	3.26441e-06	3.51573e-06	3.61993e-06	3.83887e-06	2.80389e-06	2.94586e-06	3.2159e-06	3.55278e-06	3.5859e-06	3.96533e-06	3.52825e-06	5.00694e-06	5.99173e-06		Mali	7.47906e-06	7.531e-06	8.20401e-06	8.83561e-06
Malta	141	159	169	193	188	197	55	85	60	80	100	130	150	145	135	1.06	0.534813	0	0.03				0.0003	0.0303	0.0303	0.0303		Malta	3.27906e-07	3.65646e-07	3.76082e-07	4.22137e-07	4.05666e-07	4.32683e-07	1.31759e-07	1.94489e-07	1.37382e-07	1.82128e-07	2.24177e-07	2.81127e-07	3.08302e-07	3.10147e-07	2.96187e-07		Malta	3.27906e-07	3.65646e-07	3.76082e-07	4.22137e-07
Morocco	20398	20577	21017	21735	22654	23681	24655	25325	26360	27300	27615	29300	32040	34160	36150	2.23	1.12513	0.345434	0.03	0.01	0.015		0.0003	0.0553	0.0553	0.400734		Morocco	8.65766e-05	8.63631e-05	8.53589e-05	8.67638e-05	8.9215e-05	9.49263e-05	0.000107797	0.000105757	0.000110155	0.000113431	0.000112985	0.00011564	0.000120188	0.000133352	0.000144752		Morocco	0.000627381	0.000625833	0.000618556	0.000628737
Marshall Islands	0	0	0	0	1	1	0	0	0	0	0	0	0	0	0	2.919	1.47275	0.0199	0.00075				0.0003	0.00105	0.00105	0.02095		Marshall Islands	0	0	0	0	7.47751e-11	7.61116e-11	0	0	0	0	0	0	0	0	0		Marshall Islands	0	0	0	0
Mauritania	67	71	80	80	93	104	25	30	25	30	30	20	25	30	25	4.697	2.36983	0.356592	0.00075	0.012	0.058		0.0003	0.07105	0.07105	0.427642		Mauritania	3.65365e-07	3.82863e-07	4.17452e-07	4.10306e-07	4.7056e-07	5.35622e-07	1.40436e-07	1.60961e-07	1.34227e-07	1.60151e-07	1.57701e-07	1.01417e-07	1.20489e-07	1.50467e-07	1.28616e-07		Mauritania	2.19909e-06	2.30441e-06	2.5126e-06	2.46959e-06
Mauritius	444	443	434	430	413	420	280	325	325	415	450	455	475	515	510	1.39	0.701312	0.238313	0.0358908	0	0.0124892	0.00608871	0.0003	0.0547687	0.0587758	0.293081		Mauritius	2.00295e-06	1.97616e-06	1.87345e-06	1.8244e-06	1.72869e-06	1.78941e-06	1.30116e-06	1.4425e-06	1.4435e-06	1.8327e-06	1.95686e-06	1.90865e-06	1.8938e-06	2.13679e-06	2.17049e-06		Mauritius	9.98755e-06	9.854e-06	9.3418e-06	9.09725e-06
Mexico	4686	4999	5371	5713	6176	6411	6615	7075	7715	8375	8255	8975	10200	10940	11325	1.91	0.963673	0	0.00175	0.000505	0.00277		0.0003	0.005325	0.005325	0.005325		Mexico	1.91518e-06	2.02034e-06	2.10052e-06	2.19603e-06	2.34204e-06	2.47461e-06	2.785e-06	2.84499e-06	3.10449e-06	3.3508e-06	3.25227e-06	3.41092e-06	3.68436e-06	4.11239e-06	4.36664e-06		Mexico	1.91518e-06	2.02034e-06	2.10052e-06	2.19603e-06
Micronesia, Federated States of	0	0	0	0	0	0	0	0	0	0	0	0	0	0	0	2.748	1.38648	0.0199	0.00075				0.0003	0.00105	0.00105	0.02095		Micronesia, Federated States of	0	0	0	0	0	0	0	0	0	0	0	0	0	0	0		Micronesia, Federated States of	0	0	0	0
Moldova, Republic of	4605	4598	4540	4443	4706	5504	6255	6515	7800	9435	10645	13160	16125	16115	15715	1.731	0.87336	0	0.001				0.0003	0.0013	0.0013	0.0013		Moldova, Republic of	4.59474e-07	4.53663e-07	4.33463e-07	4.1694e-07	4.35675e-07	5.1866e-07	6.42904e-07	6.39576e-07	7.66255e-07	9.21572e-07	1.02385e-06	1.221e-06	1.42195e-06	1.47887e-06	1.47927e-06		Moldova, Republic of	4.59474e-07	4.53663e-07	4.33463e-07	4.1694e-07
Monaco	3	5	6	4	1	1	0	0	0	0	0	0	0	0	0	2.11	1.06458	0	0.001				0.0003	0.0013	0.0013	0.0013		Monaco	2.99332e-10	4.93326e-10	5.72859e-10	3.75368e-10	9.25787e-11	9.42334e-11	0	0	0	0	0	0	0	0	0		Monaco	2.99332e-10	4.93326e-10	5.72859e-10	3.75368e-10
Mongolia	2499	2554	2554	2586	2666	2846	2960	3010	3035	3155	3120	3175	3490	3745	4105	2.7	1.36226	0	0.00075				0.0003	0.00105	0.00105	0.00105		Mongolia	2.01393e-07	2.03531e-07	1.96953e-07	1.96007e-07	1.9935e-07	2.16614e-07	2.45729e-07	2.38666e-07	2.40815e-07	2.48904e-07	2.42378e-07	2.3793e-07	2.48575e-07	2.77586e-07	3.12099e-07		Mongolia	2.01393e-07	2.03531e-07	1.96953e-07	1.96007e-07
Montenegro (from June 3, 2006)	3744	4566	4999	5286	5768	6791	6110	6120	6325	6490	6685	6875	7155	7290	7280	1.74	0.877901	0.0198911	0.0025				0.0003	0.0028	0.0028	0.0226911		Montenegro (from June 3, 2006)	8.04603e-07	9.7032e-07	1.028e-06	1.06841e-06	1.15014e-06	1.37833e-06	1.35262e-06	1.29403e-06	1.3383e-06	1.36536e-06	1.38487e-06	1.37388e-06	1.35897e-06	1.44093e-06	1.47598e-06		Montenegro (from June 3, 2006)	6.52047e-06	7.86343e-06	8.33089e-06	8.65838e-06
Mozambique	525	547	576	579	579	588	455	445	430	400	395	410	430	475	460	4.763	2.40313	0.359659	0.026		0.028		0.0003	0.0543	0.0543	0.413959		Mozambique	2.188e-06	2.25428e-06	2.29708e-06	2.26951e-06	2.23896e-06	2.3144e-06	1.95338e-06	1.82471e-06	1.76443e-06	1.63194e-06	1.58689e-06	1.58892e-06	1.58384e-06	1.82075e-06	1.80862e-06		Mozambique	1.66803e-05	1.71856e-05	1.75119e-05	1.73017e-05
Myanmar	398	419	421	440	459	484	355	405	410	480	520	545	695	830	1045	2.115	1.0671	0.368154	0.0224217	0	0	0.24896	0.0003	0.271681	0.273608	0.639835		Myanmar	8.35795e-06	8.70089e-06	8.45988e-06	8.69032e-06	8.94354e-06	9.59922e-06	7.6795e-06	8.36793e-06	8.47712e-06	9.86766e-06	1.05264e-05	1.06425e-05	1.2899e-05	1.60311e-05	2.07031e-05		Myanmar	1.95452e-05	2.03471e-05	1.97835e-05	2.03224e-05
Namibia	234	269	283	293	314	337	190	175	220	240	245	290	420	595	780	3.212	1.62059	0.125451	0.00075		0.02		0.0003	0.02105	0.02105	0.146501		Namibia	3.78056e-07	4.29759e-07	4.37514e-07	4.45219e-07	4.70706e-07	5.14213e-07	3.16214e-07	2.78179e-07	3.49953e-07	3.79583e-07	3.81564e-07	4.3568e-07	5.99714e-07	8.8415e-07	1.18888e-06		Namibia	2.63115e-06	2.99099e-06	3.04496e-06	3.09858e-06
Nauru	1	1	1	1	0	1	0	0	0	0	0	0	0	0	0	3.331	1.68063	0.0199	0.00075				0.0003	0.00105	0.00105	0.02095		Nauru	8.05893e-11	7.96912e-11	7.71156e-11	7.57955e-11	0	7.61116e-11	0	0	0	0	0	0	0	0	0		Nauru	1.60795e-09	1.59003e-09	1.53864e-09	1.5123e-09
Nepal	1098	1277	1434	1668	1990	2269	2570	2970	3230	3490	3545	3780	4115	4565	4725	1.984	1.00101	0.95976	0.01			0.03	0.0003	0.0403	0.0403	1.00006		Nepal	3.39622e-06	3.90586e-06	4.24431e-06	4.85238e-06	5.71118e-06	6.62828e-06	8.18868e-06	9.03848e-06	9.83655e-06	1.05675e-05	1.05699e-05	1.08721e-05	1.12491e-05	1.29868e-05	1.37879e-05		Nepal	8.42784e-05	9.69255e-05	0.000105324	0.000120414
New Zealand	633	703	775	819	811	884	795	880	890	935	815	805	835	835	900	1.56	0.787084	0.0295468	0.00293314	6.0606e-05	0.000801643	0.00226583	0.0003	0.00636123	0.00840607	0.035908		New Zealand	4.08399e-07	4.48507e-07	4.78463e-07	4.96971e-07	4.85492e-07	5.3865e-07	5.28367e-07	5.58612e-07	5.65352e-07	5.90539e-07	5.06874e-07	4.82954e-07	4.76126e-07	4.95492e-07	5.47804e-07		New Zealand	1.74455e-06	1.91588e-06	2.04384e-06	2.1229e-06
Nicaragua	256	261	259	274	287	289	145	130	170	235	250	290	450	460	485	2.218	1.11907	0.0215783	0.0012	0.0024	0.0096		0.0003	0.0135	0.0135	0.0350783		Nicaragua	2.65254e-07	2.67421e-07	2.56795e-07	2.67017e-07	2.7592e-07	2.82809e-07	1.54767e-07	1.32529e-07	1.73428e-07	2.38367e-07	2.49703e-07	2.79414e-07	4.12087e-07	4.38378e-07	4.74095e-07		Nicaragua	6.89234e-07	6.94865e-07	6.67254e-07	6.93814e-07
Netherlands	27681	27519	27358	27649	27651	27825	27975	29290	27760	27140	26500	26060	25850	25575	25505	1.43	0.721493	0.0487157	0.0041392	0.000931847	0.00462822	0.00071827	0.0003	0.0107175	0.0107865	0.0594332		Netherlands	2.29167e-05	2.25287e-05	2.1673e-05	2.15286e-05	2.12403e-05	2.1756e-05	2.38577e-05	2.38581e-05	2.26275e-05	2.19956e-05	2.11484e-05	2.0062e-05	1.89141e-05	1.9474e-05	1.99204e-05		Netherlands	0.00012627	0.000124132	0.000119417	0.000118621
Niger	118	121	126	131	137	149	45	55	45	50	45	65	95	100	135	6.061	3.05802	0.403328	0.022	0.06	0.201		0.0003	0.2833	0.2833	0.686628		Niger	2.56576e-06	2.60167e-06	2.62162e-06	2.67899e-06	2.76398e-06	3.05981e-06	1.00794e-06	1.17664e-06	9.63373e-07	1.06429e-06	9.4321e-07	1.31425e-06	1.82563e-06	1.99988e-06	2.7693e-06		Niger	6.21858e-06	6.30562e-06	6.35397e-06	6.49302e-06
Nigeria	5410	5795	6235	7121	8387	10243	13425	15365	18395	20170	20095	20470	21670	21530	21830	4.482	2.26135	0.501203	0.005	0.045	0.244		0.0003	0.2943	0.2943	0.795503		Nigeria	0.000122201	0.000129439	0.000134766	0.000151281	0.000175778	0.000218514	0.000312378	0.000341473	0.000409096	0.000446005	0.00043755	0.000429957	0.000432605	0.000447292	0.000465194		Nigeria	0.000330314	0.000349878	0.000364277	0.000408918
North Macedonia	19460	20135	22055	23935	26198	29980	30060	31235	33170	35485	37350	40675	44165	47020	47255	1.5	0.756811	0.120104	0.02				0.0003	0.0203	0.0203	0.140404		North Macedonia	3.03198e-05	3.10219e-05	3.28818e-05	3.50738e-05	3.78732e-05	4.41153e-05	4.82459e-05	4.78819e-05	5.08835e-05	5.41233e-05	5.60965e-05	5.89306e-05	6.08159e-05	6.73807e-05	6.94598e-05		North Macedonia	0.000209705	0.000214561	0.000227425	0.000242586
Norway	1936	1975	2016	2028	2063	2068	1930	1915	1660	1700	1700	1670	1710	1720	1745	1.4	0.706357		0.00214691	8.30108e-05	0.000800059	0.000814528	0.0003	0.00414451	0.00439937	0.00414451		Norway	6.53708e-07	6.59445e-07	6.5138e-07	6.4404e-07	6.46335e-07	6.59482e-07	6.71311e-07	6.362e-07	5.51867e-07	5.61932e-07	5.53336e-07	5.24354e-07	5.10305e-07	5.34166e-07	5.55873e-07		Norway	6.15838e-07	6.21243e-07	6.13644e-07	6.0673e-07
Oman	71	145	171	164	172	185	95	65	60	60	50	60	40	35	50	2.525	1.27397	0.887369	0.0329798	0	0.0798317	0	0.0003	0.113111	0.113111	1.00048		Oman	6.16386e-07	1.24479e-06	1.42055e-06	1.33907e-06	1.38549e-06	1.51684e-06	8.49583e-07	5.55206e-07	5.12854e-07	5.0992e-07	4.18433e-07	4.84367e-07	3.06909e-07	2.79468e-07	4.09512e-07		Oman	5.45199e-06	1.10103e-05	1.25649e-05	1.18442e-05
Austria	41371	41101	40774	41005	40671	40767	40915	43165	41645	40325	39835	39575	38950	38350	37425	1.32	0.665994	0.00286129	0.00173354	4.39805e-05	0.000452966	1.18058e-05	0.0003	0.00254229	0.00260329	0.00540357		Austria	8.26622e-06	8.12075e-06	7.79578e-06	7.70573e-06	7.54007e-06	7.69295e-06	8.42134e-06	8.48572e-06	8.19259e-06	7.88753e-06	7.67251e-06	7.35294e-06	6.87817e-06	7.04767e-06	7.05464e-06		Austria	1.71579e-05	1.6856e-05	1.61814e-05	1.59945e-05
Pakistan	8836	9241	9658	10187	11124	12118	13320	14280	15295	16150	16505	17995	19800	22175	24335	3.605	1.81887	0.151539	0.0455839	0	0.0018	0.0018	0.0003	0.0494839	0.0494839	0.201023		Pakistan	3.35589e-05	3.4706e-05	3.50998e-05	3.63885e-05	3.92006e-05	4.34667e-05	5.21128e-05	5.33613e-05	5.71938e-05	6.00455e-05	6.04267e-05	6.35526e-05	6.64618e-05	7.74613e-05	8.71938e-05		Pakistan	0.000136329	0.000140989	0.000142589	0.000147824
Palestinian Territories	0	0	0	138	272	526	590	730	795	805	845	1000	1170	1240	1385	3.311	1.67053	0.0294426	0.03		0.005		0.0003	0.0353	0.0353	0.0647426		Palestinian Territories	0	0	0	3.51648e-07	6.83772e-07	1.34593e-06	1.64665e-06	1.94595e-06	2.12069e-06	2.13508e-06	2.20689e-06	2.51937e-06	2.80158e-06	3.08996e-06	3.54009e-06		Palestinian Territories	0	0	0	6.44945e-07
Palau	0	0	0	0	1	0	0	0	0	0	0	0	0	0	0	1.907	0.962159	0.0199	0.00075				0.0003	0.00105	0.00105	0.02095		Palau	0	0	0	0	7.47751e-11	0	0	0	0	0	0	0	0	0	0		Palau	0	0	0	0
Panama	170	173	180	197	192	211	65	70	85	100	90	100	115	160	155	2.119	1.06912	0.0502036	0.0015	0.003	0.0225		0.0003	0.0273	0.0273	0.0775036		Panama	3.56204e-07	3.58451e-07	3.60901e-07	3.88224e-07	3.73277e-07	4.17548e-07	1.40298e-07	1.44309e-07	1.75355e-07	2.05119e-07	1.81784e-07	1.94841e-07	2.12962e-07	3.08347e-07	3.06397e-07		Panama	1.01125e-06	1.01763e-06	1.02458e-06	1.10215e-06
Papua New Guinea	19	19	22	23	20	23	0	0	0	0	0	0	0	0	0	3.099	1.56357	0.9639	0.035				0.0003	0.0353	0.0353	0.9992		Papua New Guinea	5.14773e-08	5.09037e-08	5.70362e-08	5.86079e-08	5.02773e-08	5.88524e-08	0	0	0	0	0	0	0	0	0		Papua New Guinea	1.45712e-06	1.44088e-06	1.61446e-06	1.65895e-06
Paraguay	671	667	690	704	723	731	595	605	595	625	665	705	750	765	745	2.422	1.222	0.021879	0.00075				0.0003	0.00105	0.00105	0.022929		Paraguay	5.40754e-08	5.3154e-08	5.32098e-08	5.336e-08	5.40624e-08	5.56376e-08	4.93949e-08	4.7971e-08	4.72108e-08	4.93075e-08	5.16607e-08	5.28318e-08	5.34187e-08	5.67032e-08	5.66416e-08		Paraguay	1.18085e-06	1.16073e-06	1.16195e-06	1.16523e-06
Peru	4971	4910	4915	4841	4811	4807	4730	4790	5000	5145	5110	5290	5660	5995	6160	1.98	0.998991	0.0198733	0.00075		0.01		0.0003	0.01105	0.01105	0.0309233		Peru	4.21593e-06	4.11779e-06	3.98877e-06	3.86146e-06	3.78587e-06	3.85033e-06	4.13237e-06	3.99698e-06	4.17511e-06	4.27161e-06	4.17765e-06	4.17191e-06	4.24249e-06	4.67636e-06	4.9287e-06		Peru	1.17982e-05	1.15236e-05	1.11625e-05	1.08062e-05
Philippines	11804	11652	11723	11707	11778	11868	12120	12460	13230	14240	15235	17080	18985	21615	23655	1.916	0.9667	0.215104	0.01			0.01	0.0003	0.0203	0.039488	0.235404		Philippines	3.57752e-05	3.4921e-05	3.39983e-05	3.33706e-05	3.31211e-05	3.39707e-05	3.78393e-05	3.7155e-05	3.94785e-05	4.22492e-05	4.45099e-05	4.8136e-05	5.08532e-05	6.02528e-05	6.7636e-05		Philippines	0.000213271	0.000208178	0.000202678	0.000198936
Poland	161213	171485	186444	204774	221091	237664	247385	265010	263395	261935	260475	258490	258055	257345	248585	1.158	0.584258	0	0.001				0.0003	0.0013	0.0013	0.0013		Poland	1.60854e-05	1.69196e-05	1.7801e-05	1.92164e-05	2.04683e-05	2.23959e-05	2.54268e-05	2.6016e-05	2.58754e-05	2.55847e-05	2.50529e-05	2.3983e-05	2.27561e-05	2.36165e-05	2.33996e-05		Poland	1.60854e-05	1.69196e-05	1.7801e-05	1.92164e-05
Portugal	32514	32910	34034	35660	36484	36701	36620	37175	36075	34950	34100	33290	32975	32530	31965	1.44	0.726539	0.00872703	0.0141976	6.77491e-05	0.00782135	2.43705e-05	0.000288389	0.0223994	0.0224303	0.0311265		Portugal	5.59748e-05	5.60252e-05	5.60661e-05	5.77391e-05	5.8278e-05	5.96724e-05	6.49424e-05	6.29679e-05	6.11471e-05	5.89014e-05	5.65898e-05	5.32924e-05	5.0172e-05	5.15081e-05	5.19157e-05		Portugal	7.76762e-05	7.77461e-05	7.78029e-05	8.01244e-05
Rwanda	263	282	300	320	332	339	255	260	305	395	475	595	880	1125	1445	3.698	1.86579	0.4071	0.00075		0.04		0.0003	0.04105	0.04105	0.44815		Rwanda	8.28623e-07	8.78584e-07	9.04456e-07	9.48237e-07	9.70552e-07	1.00873e-06	8.27616e-07	8.05973e-07	9.46125e-07	1.2183e-06	1.44263e-06	1.7432e-06	2.45041e-06	3.26004e-06	4.29508e-06		Rwanda	9.04622e-06	9.59165e-06	9.8741e-06	1.03521e-05
Romania	53716	63450	77357	95475	120720	148822	171275	195525	213380	225600	237090	247390	255980	261425	259785	1.71	0.862765	0.097405	0.01				0.0003	0.0103	0.0103	0.107705		Romania	4.24648e-05	4.96009e-05	5.8518e-05	7.09873e-05	8.85491e-05	0.000111113	0.000139478	0.000152081	0.000166083	0.00017459	0.000180676	0.00018186	0.000178849	0.000190082	0.00019375		Romania	0.000444045	0.000518667	0.000611911	0.0007423
Russian Federation	85810	87835	90515	94918	96842	99975	103735	105195	107055	109200	109390	110585	117050	121170	115655	1.41	0.711403	0	0.001				0.0003	0.0013	0.0013	0.0013		Russian Federation	8.56188e-06	8.66626e-06	8.64205e-06	8.90729e-06	8.9655e-06	9.42098e-06	1.06621e-05	1.0327e-05	1.05169e-05	1.06662e-05	1.05213e-05	1.02602e-05	1.03218e-05	1.11198e-05	1.08867e-05		Russian Federation	8.56188e-06	8.66626e-06	8.64205e-06	8.90729e-06
Solomon Islands	0	0	0	1	0	1	0	0	0	0	0	0	0	0	0	3.557	1.79465	0.351975	0.00075				0.0003	0.00105	0.00105	0.353025		Solomon Islands	0	0	0	7.57955e-11	0	7.61116e-11	0	0	0	0	0	0	0	0	0		Solomon Islands	0	0	0	2.54835e-08
Zambia	147	157	169	189	210	222	105	115	125	155	175	190	250	275	280	4.101	2.06912	0.406157	0.0015	0.006	0.176		0.0003	0.1838	0.1838	0.589957		Zambia	2.07372e-06	2.19011e-06	2.28131e-06	2.50762e-06	2.74873e-06	2.95774e-06	1.52584e-06	1.59616e-06	1.73616e-06	2.14053e-06	2.37976e-06	2.49239e-06	3.11694e-06	3.56808e-06	3.72643e-06		Zambia	6.65619e-06	7.02977e-06	7.32251e-06	8.04889e-06
Samoa	23	20	19	20	17	16	0	0	0	0	0	0	0	0	0	3.829	1.93189	0.1664	0.00075				0.0003	0.00105	0.00105	0.16745		Samoa	1.85355e-09	1.59382e-09	1.4652e-09	1.51591e-09	1.27118e-09	1.21779e-09	0	0	0	0	0	0	0	0	0		Samoa	2.95598e-07	2.54177e-07	2.33664e-07	2.41751e-07
San Marino	3	1	4	6	7	7	0	0	0	0	0	0	0	0	0	1.149	0.579717	0	0.001				0.0003	0.0013	0.0013	0.0013		San Marino	2.99332e-10	9.86653e-11	3.81906e-10	5.63052e-10	6.48051e-10	6.59634e-10	0	0	0	0	0	0	0	0	0		San Marino	2.99332e-10	9.86653e-11	3.81906e-10	5.63052e-10
Sao Tome and Principe	8	9	9	7	6	6	0	0	0	0	0	0	0	0	0	3.644	1.83855	0.6864	0.00075	0.021	0.18		0.0003	0.20205	0.20205	0.88845		Sao Tome and Principe	1.24061e-07	1.38014e-07	1.33553e-07	1.02096e-07	8.63332e-08	8.78762e-08	0	0	0	0	0	0	0	0	0		Sao Tome and Principe	5.4552e-07	6.06871e-07	5.87257e-07	4.48937e-07
Saudi Arabia	450	546	643	837	1161	1535	1325	1180	1160	1235	1090	1000	945	930	890	2.28	1.15035	0.460611	0.067445	0	0.0986605	0	0.0003	0.166406	0.166406	0.627016		Saudi Arabia	5.74736e-06	6.89575e-06	7.85836e-06	1.00542e-05	1.37584e-05	1.85156e-05	1.74325e-05	1.4828e-05	1.45868e-05	1.54411e-05	1.34197e-05	1.18764e-05	1.0667e-05	1.09247e-05	1.07238e-05		Saudi Arabia	2.1656e-05	2.59832e-05	2.96103e-05	3.78842e-05
Sweden	5534	5638	5748	5941	5986	6158	6210	7685	6855	6705	6780	6885	7140	7610	7850	1.45	0.731584		0.00282157	0.00010914	0.00119547	0.000817622	0.0003	0.00524381	0.00554404	0.00524381		Sweden	2.35479e-06	2.37231e-06	2.34043e-06	2.3776e-06	2.36336e-06	2.47473e-06	2.72203e-06	3.21739e-06	2.8719e-06	2.79298e-06	2.78103e-06	2.72425e-06	2.68514e-06	2.97829e-06	3.15127e-06		Sweden	2.22727e-06	2.24384e-06	2.21369e-06	2.24885e-06
Switzerland	10557	10568	10649	10570	10469	10320	10200	9995	9365	9310	9190	9215	8880	8765	8520	1.33	0.671039	0.0260508	0.00372122	0.000178243	0.00133222	0.000777803	0.0003	0.00630949	0.00662596	0.0323603		Switzerland	5.3688e-06	5.3145e-06	5.18216e-06	5.05566e-06	4.93994e-06	4.95667e-06	5.34348e-06	5.0011e-06	4.68913e-06	4.63492e-06	4.5052e-06	4.35774e-06	3.99121e-06	4.09975e-06	4.08769e-06		Switzerland	2.62205e-05	2.59553e-05	2.5309e-05	2.46912e-05
Senegal	691	689	738	783	833	932	895	875	970	1075	1140	1210	1305	1395	1420	3.818	1.92634	0.206852	0.004	0.017	0.127		0.0003	0.1483	0.1483	0.355152		Senegal	7.86515e-06	7.75499e-06	8.03805e-06	8.38218e-06	8.79739e-06	1.00189e-05	1.0494e-05	9.79904e-06	1.08705e-05	1.19783e-05	1.25082e-05	1.28069e-05	1.31279e-05	1.4604e-05	1.52482e-05		Senegal	1.88357e-05	1.85718e-05	1.92497e-05	2.00738e-05
Serbia	33423	45621	49698	51105	56237	59571	58035	59430	61570	63610	65530	68570	71120	73205	73520	1.61	0.812311	0.0198911	0.0025				0.0003	0.0028	0.0028	0.0226911		Serbia	7.18276e-06	9.69491e-06	1.022e-05	1.03294e-05	1.12137e-05	1.20908e-05	1.28476e-05	1.2566e-05	1.30275e-05	1.33822e-05	1.35752e-05	1.37028e-05	1.3508e-05	1.44696e-05	1.49057e-05		Serbia	5.82088e-05	7.85672e-05	8.28223e-05	8.37091e-05
Serbia (including Kosovo) (June 3, 2006-February 16, 2008)	15875	9376	6591	6160	5703	5505	5220	4985	4725	4540	4335	3835	3485	3070	2605	1.61	0.812311	0.0198911	0.0025				0.0003	0.0028	0.0028	0.0226911		Serbia (including Kosovo) (June 3, 2006-February 16, 2008)	3.41161e-06	1.99249e-06	1.35538e-06	1.24507e-06	1.13718e-06	1.11732e-06	1.15559e-06	1.05404e-06	9.99759e-07	9.55119e-07	8.98042e-07	7.66373e-07	6.61917e-07	6.06811e-07	5.28148e-07		Serbia (including Kosovo) (June 3, 2006-February 16, 2008)	2.76476e-05	1.61471e-05	1.0984e-05	1.009e-05
Serbia and Montenegro (February 5, 2003-June 2, 2006)	25669	14974	10736	9762	8564	8029	7380	6840	6430	5985	5510	4865	4370	3800	3270	1.61	0.812311	0.0198911	0.0025				0.0003	0.0028	0.0028	0.0226911		Serbia and Montenegro (February 5, 2003-June 2, 2006)	5.51639e-06	3.18212e-06	2.20777e-06	1.97311e-06	1.70766e-06	1.6296e-06	1.63377e-06	1.44627e-06	1.36052e-06	1.25912e-06	1.14146e-06	9.72205e-07	8.30007e-07	7.51101e-07	6.62973e-07		Serbia and Montenegro (February 5, 2003-June 2, 2006)	4.47046e-05	2.57878e-05	1.78917e-05	1.599e-05
Seychelles	87	81	80	77	75	76	5	5	5	5	5	5	0	0	0	2.02	1.01917	0.19	0.00075		0.006		0.0003	0.00705	0.00705	0.19705		Seychelles	4.70756e-08	4.33406e-08	4.14221e-08	3.91863e-08	3.76546e-08	3.88386e-08	2.78699e-09	2.66191e-09	2.66376e-09	2.64852e-09	2.60801e-09	2.5158e-09	0	0	0		Seychelles	1.31578e-06	1.21139e-06	1.15776e-06	1.09527e-06
Sierra Leone	599	585	595	604	614	649	625	675	715	715	745	760	810	1040	1145	3.791	1.91271	0.406157	0.00075	0.028	0.225		0.0003	0.25405	0.25405	0.660207		Sierra Leone	1.16798e-05	1.12797e-05	1.11017e-05	1.10767e-05	1.11085e-05	1.19516e-05	1.25538e-05	1.29496e-05	1.37265e-05	1.3648e-05	1.40031e-05	1.378e-05	1.39588e-05	1.86513e-05	2.10627e-05		Sierra Leone	3.03525e-05	2.93128e-05	2.88503e-05	2.87853e-05
Zimbabwe	415	452	462	512	545	584	620	910	1215	1525	1595	1685	1920	2210	2495	3.724	1.87891	0.351975	0.0015	0	0.014		0.0003	0.0158	0.0158	0.367775		Zimbabwe	5.03261e-07	5.42021e-07	5.36108e-07	5.83957e-07	6.13227e-07	6.68854e-07	7.74505e-07	1.08576e-06	1.45067e-06	1.81038e-06	1.86452e-06	1.90009e-06	2.05779e-06	2.46494e-06	2.85442e-06		Zimbabwe	1.17143e-05	1.26166e-05	1.24789e-05	1.35927e-05
Singapore	733	761	797	829	891	955	835	885	930	1050	1035	1055	1130	1140	1190	0.97	0.489405	0.160334	0.03				0.0003	0.0303	0.063179	0.190634		Singapore	3.55439e-06	3.64904e-06	3.69815e-06	3.78078e-06	4.00883e-06	4.37358e-06	4.17095e-06	4.22231e-06	4.44008e-06	4.98432e-06	4.83796e-06	4.7571e-06	4.84277e-06	5.08434e-06	5.44389e-06		Singapore	1.07249e-05	1.10105e-05	1.11586e-05	1.1408e-05
Slovakia	13055	14239	15909	17813	19242	20581	21165	21975	22020	22230	22030	22395	22785	22550	21605	1.49	0.751766	0	0.001				0.0003	0.0013	0.0013	0.0013		Slovakia	1.30259e-06	1.40489e-06	1.51893e-06	1.67161e-06	1.7814e-06	1.93942e-06	2.17539e-06	2.15728e-06	2.1632e-06	2.17133e-06	2.11888e-06	2.07784e-06	2.00925e-06	2.06941e-06	2.0337e-06		Slovakia	1.30259e-06	1.40489e-06	1.51893e-06	1.67161e-06
Slovenia	4687	4772	4936	5397	5776	6207	6255	6635	6600	6450	6380	6340	6220	6135	5980	1.51	0.761857	0	0.001				0.0003	0.0013	0.0013	0.0013		Slovenia	4.67656e-07	4.70831e-07	4.71272e-07	5.06465e-07	5.34734e-07	5.84907e-07	6.42904e-07	6.51356e-07	6.4837e-07	6.30009e-07	6.1364e-07	5.88233e-07	5.485e-07	5.63008e-07	5.62904e-07		Slovenia	4.67656e-07	4.70831e-07	4.71272e-07	5.06465e-07
Somalia	1670	1711	1921	2603	3738	5279	7720	8960	9885	10655	11180	12530	13640	15330	17455	6.132	3.09384	0.0198931	0.005		0.001		0.0003	0.0063	0.0063	0.0261931		Somalia	8.07504e-07	8.1811e-07	8.88834e-07	1.18377e-06	1.67706e-06	2.41076e-06	3.84533e-06	4.26268e-06	4.70601e-06	5.04357e-06	5.21113e-06	5.63389e-06	5.82905e-06	6.81773e-06	7.96251e-06		Somalia	3.3573e-06	3.4014e-06	3.69544e-06	4.92169e-06
Soviet Union (until 25.12.1991)	1523	1343	1199	1464	1254	1135	870	845	765	650	590	530	445	405	260	n.a.												Soviet Union (until 25.12.1991)																	Soviet Union (until 25.12.1991)
Spain	34347	35826	39119	44251	47204	49203	50680	55415	52900	52150	52460	53870	54830	55975	56160	1.12	0.565086	0.00723017	0.00262202	0.000374818	0.00108027	2.03522e-05	0.000290737	0.0043882	0.00445605	0.0116184		Spain	1.1747e-05	1.21163e-05	1.28024e-05	1.4234e-05	1.49795e-05	1.58929e-05	1.78551e-05	1.86471e-05	1.78131e-05	1.74601e-05	1.72953e-05	1.71322e-05	1.65734e-05	1.76076e-05	1.81203e-05		Spain	3.06282e-05	3.15911e-05	3.33799e-05	3.71126e-05
Sri Lanka	9255	8972	8748	8453	8293	8111	7840	7615	7465	7330	7000	6830	6815	6960	6960	1.974	0.995964	0.494006	0.025			0.025	0.0003	0.0503	0.0503	0.544306		Sri Lanka	3.57299e-05	3.42514e-05	3.23169e-05	3.06925e-05	2.97062e-05	2.95736e-05	3.11788e-05	2.89249e-05	2.83748e-05	2.77023e-05	2.60505e-05	2.45192e-05	2.32529e-05	2.47135e-05	2.53494e-05		Sri Lanka	0.00038664	0.000370641	0.000349707	0.00033213
St. Kitts and Nevis	0	0	0	2	3	4	0	0	0	0	0	0	0	0	5	1.505	0.759334	0.23315	0.01	0.04	0.11		0.0003	0.1603	0.1603	0.39345		St. Kitts and Nevis	0	0	0	2.31429e-08	3.4247e-08	4.64788e-08	0	0	0	0	0	0	0	0	5.80354e-08		St. Kitts and Nevis	0	0	0	5.68032e-08
St. Lucia	41	46	44	47	44	37	0	0	0	0	0	0	0	0	0	1.379	0.695762	0.213231	0.01	0.03	0.1		0.0003	0.1403	0.1403	0.353531		St. Lucia	4.41499e-07	4.8982e-07	4.53381e-07	4.76003e-07	4.39621e-07	3.76288e-07	0	0	0	0	0	0	0	0	0		St. Lucia	1.1125e-06	1.23426e-06	1.14244e-06	1.19944e-06
St. Vincent and the Grenadines	19	23	19	20	19	16	0	0	0	0	0	0	0	0	0	1.775	0.89556	0.147776	0.03	0.03	0.068		0.0003	0.1283	0.1283	0.276076		St. Vincent and the Grenadines	1.87098e-07	2.23963e-07	1.79033e-07	1.8523e-07	1.73599e-07	1.48802e-07	0	0	0	0	0	0	0	0	0		St. Vincent and the Grenadines	4.02596e-07	4.81922e-07	3.85243e-07	3.98577e-07
Stateless	3030	3112	3159	3008	3317	3987	4815	5535	6085	6255	6155	6650	6965	7290	7225	n.a.												Stateless																	Stateless
South Africa	1768	1828	1907	1960	1990	2050	2035	2195	2385	2645	2630	2805	3130	3450	3550	2.216	1.11806	0.125484	0.0015	0.001	0.003		0.0003	0.0058	0.0058	0.131284		South Africa	7.87042e-07	8.04683e-07	8.12328e-07	8.20612e-07	8.21956e-07	8.61873e-07	9.33185e-07	9.61383e-07	1.04533e-06	1.15265e-06	1.12858e-06	1.16112e-06	1.23144e-06	1.41255e-06	1.49089e-06		South Africa	1.78148e-05	1.82141e-05	1.83872e-05	1.85747e-05
Sudan (including South Sudan) (until July 8, 2011)	644	591	483	415	360	327	145	135	115	100	80	35	30	35	15	4.323	2.18113	0.344047	0.039	0.001	0.021		0.0003	0.0613	0.0613	0.405347		Sudan (including South Sudan) (until July 8, 2011)	3.02994e-06	2.7496e-06	2.17451e-06	1.83638e-06	1.57156e-06	1.45301e-06	7.02755e-07	6.24926e-07	5.32714e-07	4.60579e-07	3.62827e-07	1.53125e-07	1.24745e-07	1.51456e-07	6.65796e-08		Sudan (including South Sudan) (until July 8, 2011)	2.00355e-05	1.81817e-05	1.4379e-05	1.21431e-05
Sudan (excluding South Sudan) (from July 9, 2011)	0	27	133	237	365	558	560	745	840	1125	1220	1495	1765	2230	2660	4.323	2.18113	0.344047	0.039	0.001	0.021		0.0003	0.0613	0.0613	0.405347		Sudan (excluding South Sudan) (from July 9, 2011)	0	1.25616e-07	5.98777e-07	1.04873e-06	1.59339e-06	2.47945e-06	2.71409e-06	3.44866e-06	3.89112e-06	5.18152e-06	5.53311e-06	6.54062e-06	7.33918e-06	9.64989e-06	1.18068e-05		Sudan (excluding South Sudan) (from July 9, 2011)	0	8.30638e-07	3.95942e-06	6.93473e-06
South Sudan (from July 9, 2011)	0	2	13	20	27	41	10	5	5	15	15	55	75	145	235	3.864	1.94955	0.344047	0.039	0.001	0.021		0.0003	0.0613	0.0613	0.405347		South Sudan (from July 9, 2011)	0	9.30489e-09	5.85271e-08	8.85002e-08	1.17867e-07	1.82182e-07	4.84659e-08	2.31454e-08	2.31615e-08	6.90869e-08	6.80301e-08	2.40625e-07	3.11863e-07	6.27459e-07	1.04308e-06		South Sudan (from July 9, 2011)	0	6.15288e-08	3.87011e-07	5.85209e-07
Suriname	12	14	14	13	14	11	0	0	0	0	0	0	0	0	0	2.249	1.13471	0.151776	0.01	0.015	0.07		0.0003	0.0953	0.0953	0.247076		Suriname	8.77732e-08	1.01261e-07	9.79882e-08	8.94314e-08	9.50142e-08	7.59883e-08	0	0	0	0	0	0	0	0	0		Suriname	2.27562e-07	2.6253e-07	2.54045e-07	2.31861e-07
Syria	8910	9651	11518	14929	26487	69878	130175	149470	163625	175995	183660	197455	208795	218755	223605	2.712	1.36831	0.0294426	0.05		0.01		0.0003	0.0603	0.0603	0.0897426		Syria	4.12366e-05	4.41683e-05	5.10091e-05	6.49833e-05	0.000113741	0.000305435	0.000620612	0.000680621	0.000745594	0.000797373	0.000819372	0.000849772	0.000854043	0.000931177	0.000976312		Syria	6.13711e-05	6.57342e-05	7.59152e-05	9.67126e-05
Tajikistan	256	288	299	354	450	577	925	1105	1290	1525	1605	2010	2710	2995	3315	3.072	1.54995	0.133277	0.05				0.0003	0.0503	0.0503	0.183577		Tajikistan	9.88316e-07	1.09946e-06	1.10457e-06	1.28536e-06	1.61194e-06	2.1038e-06	3.67862e-06	4.19725e-06	4.90335e-06	5.76344e-06	5.973e-06	7.21574e-06	9.24655e-06	1.06346e-05	1.20737e-05		Tajikistan	3.607e-06	4.01266e-06	4.03128e-06	4.69111e-06
Taiwan	2775	2924	3190	3432	3693	3932	4030	4270	4740	5070	4825	4950	5355	5705	5825	0.999	0.504036	0.092191	0.02				0.0003	0.0203	0.058676	0.112491		Taiwan	1.24972e-05	1.30214e-05	1.37469e-05	1.45366e-05	1.54315e-05	1.67238e-05	1.86957e-05	1.89201e-05	2.10172e-05	2.23518e-05	2.09463e-05	2.07292e-05	2.13139e-05	2.36305e-05	2.47483e-05		Taiwan	2.3959e-05	2.49641e-05	2.63549e-05	2.78688e-05
Tanzania	383	403	427	480	504	531	455	485	500	620	640	675	860	1050	1160	4.606	2.32392	0.382019	0.0015	0	0.23		0.0003	0.2318	0.2318	0.613819		Tanzania	6.81397e-06	7.08989e-06	7.26933e-06	8.03172e-06	8.31978e-06	8.92215e-06	8.33874e-06	8.48964e-06	8.75828e-06	1.07981e-05	1.0976e-05	1.11669e-05	1.35224e-05	1.71814e-05	1.94698e-05		Tanzania	1.80438e-05	1.87744e-05	1.92496e-05	2.12684e-05
Thailand	38502	38520	38418	37965	37162	36098	34960	33770	32990	31520	30190	28980	28010	26845	25520	1.212	0.611504	0.655449	0.0495517	0	0	0.208501	0.0003	0.258352	0.283891	0.913802		Thailand	0.000838924	0.000829963	0.000801013	0.000778017	0.000751309	0.000742842	0.000784691	0.000723964	0.000707733	0.000672329	0.000634109	0.000587174	0.000539396	0.000537987	0.000524593		Thailand	0.00270037	0.00267152	0.00257834	0.00250432
Timor-Leste	0	0	0	0	0	0	0	0	0	0	0	0	0	0	0	2.707	1.36579	0.242026	0.03			0.04	0.0003	0.0703	0.0703	0.312326		Timor-Leste	0	0	0	0	0	0	0	0	0	0	0	0	0	0	0		Timor-Leste	0	0	0	0
Togo	3462	3468	3497	3509	3582	3615	3560	3625	3730	3835	3755	3635	3655	3770	3790	4.192	2.11504	0.4071	0.005	0.094	0.186		0.0003	0.2853	0.2853	0.6924		Togo	7.58083e-05	7.50934e-05	7.32741e-05	7.22668e-05	7.27771e-05	7.47604e-05	8.03022e-05	7.80987e-05	8.04167e-05	8.22074e-05	7.92613e-05	7.40156e-05	7.07346e-05	7.59277e-05	7.82944e-05		Togo	0.000183981	0.000182246	0.00017783	0.000175386
Tonga	23	20	21	22	20	21	0	0	0	0	0	0	0	0	0	3.129	1.57871	0.1664	0.00075				0.0003	0.00105	0.00105	0.16745		Tonga	1.85355e-09	1.59382e-09	1.61943e-09	1.6675e-09	1.4955e-09	1.59834e-09	0	0	0	0	0	0	0	0	0		Tonga	2.95598e-07	2.54177e-07	2.5826e-07	2.65927e-07
Trinidad and Tobago	163	167	166	158	148	149	25	25	15	25	25	35	30	35	30	1.532	0.772957	0.172628	0.01	0.02	0.08		0.0003	0.1103	0.1103	0.282928		Trinidad and Tobago	1.37991e-06	1.39802e-06	1.34473e-06	1.25802e-06	1.16253e-06	1.19131e-06	2.18017e-07	2.08233e-07	1.25027e-07	2.07185e-07	2.04016e-07	2.75525e-07	2.2446e-07	2.72521e-07	2.396e-07		Trinidad and Tobago	3.53958e-06	3.58602e-06	3.44935e-06	3.22691e-06
Chad	47	50	52	69	75	77	15	10	15	15	15	25	30	45	40	6.12	3.08779	0.405214	0.009	0.003	0.09		0.0003	0.1023	0.1023	0.507514		Chad	3.6903e-07	3.8821e-07	3.9069e-07	5.0954e-07	5.46392e-07	5.70989e-07	1.21323e-07	7.7252e-08	1.15958e-07	1.15295e-07	1.13531e-07	1.82529e-07	2.0818e-07	3.24971e-07	2.96296e-07		Chad	1.83077e-06	1.92592e-06	1.93823e-06	2.52785e-06
Czechia	18461	19218	20358	21692	22405	23303	23635	24665	24430	24210	24020	23735	23570	23425	22435	1.45	0.731584	0	0.001				0.0003	0.0013	0.0013	0.0013		Czechia	1.84199e-06	1.89615e-06	1.94371e-06	2.03562e-06	2.07423e-06	2.19592e-06	2.42926e-06	2.42136e-06	2.39995e-06	2.36473e-06	2.31029e-06	2.20216e-06	2.07848e-06	2.14971e-06	2.11183e-06		Czechia	1.84199e-06	1.89615e-06	1.94371e-06	2.03562e-06
Czechoslovakia (until December 31, 1992)	1406	1312	1186	989	889	823	615	560	490	420	355	290	260	200	120	n.a.												Czechoslovakia (until December 31, 1992)																	Czechoslovakia (until December 31, 1992)
Tunisia	5734	5894	6176	6572	7103	7725	8395	9055	9740	10630	11190	12515	14610	16790	19575	1.832	0.924319	0.345434	0.0214199	0.00235335	0.0211801	0	0.0003	0.0452533	0.0452533	0.390687		Tunisia	1.99157e-05	2.02433e-05	2.05263e-05	2.14685e-05	2.28908e-05	2.53402e-05	3.00363e-05	3.09438e-05	3.33077e-05	3.61433e-05	3.74654e-05	4.04202e-05	4.4848e-05	5.36362e-05	6.4142e-05		Tunisia	0.000171939	0.000174767	0.00017721	0.000185345
Turkey	501386	500668	499314	496297	491665	476483	461120	446850	437070	424955	408760	394790	385510	386195	372840	1.51	0.761857	0.0296332	0.016699	1.05535e-05	0.004403	0	0.0003	0.0214126	0.0214126	0.0510457		Turkey	0.000824003	0.000813653	0.000785227	0.000767121	0.000749731	0.000739567	0.000780653	0.000722544	0.000707221	0.000683684	0.000647569	0.000603326	0.000559947	0.000583757	0.000578071		Turkey	0.00196435	0.00193968	0.00187191	0.00182875
Turkmenistan	603	626	639	660	751	868	635	635	640	680	625	645	1090	1095	1035	2.69	1.35721	0.13495	0.012				0.0003	0.0123	0.0123	0.14725		Turkmenistan	5.69259e-07	5.84387e-07	5.77243e-07	5.86007e-07	6.57829e-07	7.73902e-07	6.17525e-07	5.89811e-07	5.94868e-07	6.28431e-07	5.68767e-07	5.66216e-07	9.0944e-07	9.50771e-07	9.21797e-07		Turkmenistan	6.81493e-06	6.99602e-06	6.91051e-06	7.01542e-06
Tuvalu	0	0	0	0	0	0	0	0	0	0	0	0	0	0	0	3.208	1.61857	0.1664	0.00075				0.0003	0.00105	0.00105	0.16745		Tuvalu	0	0	0	0	0	0	0	0	0	0	0	0	0	0	0		Tuvalu	0	0	0	0
Uganda	650	674	685	731	749	805	805	800	910	1045	1105	1255	1645	2185	2625	4.283	2.16095	0.382204	0.00075		0.168		0.0003	0.16905	0.16905	0.551254		Uganda	8.43367e-06	8.64761e-06	8.50469e-06	8.92044e-06	9.01705e-06	9.86444e-06	1.07594e-05	1.02127e-05	1.1625e-05	1.32732e-05	1.38206e-05	1.51417e-05	1.88636e-05	2.6075e-05	3.21317e-05		Uganda	2.75013e-05	2.81989e-05	2.77329e-05	2.90886e-05
Ukraine	49241	49123	49643	49436	51916	54260	55650	56490	57905	58550	59080	61205	423940	432355	453345	0.977	0.492936	0	0.001				0.0003	0.0013	0.0013	0.0013		Ukraine	4.91313e-06	4.84673e-06	4.73974e-06	4.63917e-06	4.80631e-06	5.1131e-06	5.71984e-06	5.54561e-06	5.68846e-06	5.71892e-06	5.68242e-06	5.67868e-06	3.73844e-05	3.96772e-05	4.26739e-05		Ukraine	4.91313e-06	4.84673e-06	4.73974e-06	4.63917e-06
Hungary	20435	23795	30941	39274	45956	53016	57670	62175	63655	63430	63275	63185	63230	64390	62680	1.51	0.761857	0	0.001				0.0003	0.0013	0.0013	0.0013		Hungary	2.03895e-06	2.34774e-06	2.95414e-06	3.68555e-06	4.25455e-06	4.99588e-06	5.92746e-06	6.1037e-06	6.25333e-06	6.19558e-06	6.0859e-06	5.86239e-06	5.57582e-06	5.90906e-06	5.90014e-06		Hungary	2.03895e-06	2.34774e-06	2.95414e-06	3.68555e-06
Unclear / No information provided	10447	9893	9635	8797	9550	12381	15130	15410	16315	17300	17780	18180	18405	18065	17365	n.a.												Unclear / No information provided																	Unclear / No information provided
Uruguay	232	227	233	229	231	232	80	95	100	120	165	165	180	185	225	1.409	0.710898	0.0198812	0.01				0.0003	0.0103	0.0103	0.0301812		Uruguay	1.83406e-07	1.77453e-07	1.76257e-07	1.70265e-07	1.6944e-07	1.73215e-07	6.51483e-08	7.38916e-08	7.78346e-08	9.28672e-08	1.25739e-07	1.21294e-07	1.25763e-07	1.34513e-07	1.67807e-07		Uruguay	5.37418e-07	5.19976e-07	5.1647e-07	4.98914e-07
Uzbekistan	3362	3409	3348	3224	3086	3030	2845	2815	2815	2960	2980	3095	3540	3845	4085	3.5	1.76589	0.135028	0.03				0.0003	0.0303	0.0303	0.165328		Uzbekistan	7.81859e-06	7.83954e-06	7.45042e-06	7.05166e-06	6.65896e-06	6.65498e-06	6.81554e-06	6.44103e-06	6.4455e-06	6.73873e-06	6.68049e-06	6.69299e-06	7.27593e-06	8.22424e-06	8.9624e-06		Uzbekistan	4.26612e-05	4.27755e-05	4.06524e-05	3.84766e-05
Vanuatu	2	2	2	2	2	3	0	0	0	0	0	0	0	0	0	3.596	1.81433	0.351975	0.00075				0.0003	0.00105	0.00105	0.353025		Vanuatu	1.61179e-10	1.59382e-10	1.54231e-10	1.51591e-10	1.4955e-10	2.28335e-10	0	0	0	0	0	0	0	0	0		Vanuatu	5.41905e-08	5.35866e-08	5.18547e-08	5.0967e-08
Vatican City	4	4	1	1	1	1	0	0	0	0	0	0	0	0	0	n.a.												Vatican City																	Vatican City
Venezuela, Bolivarian Republic of	1746	1803	1858	1924	2039	2139	2145	2365	2700	3060	3155	3385	4160	5520	6110	2.079	1.04894	0.106173	0.00377107	0.00400629	0.0207201	0	0.0003	0.0287975	0.0287975	0.134971		Venezuela, Bolivarian Republic of	3.85911e-06	3.94068e-06	3.92965e-06	3.99957e-06	4.18157e-06	4.46506e-06	4.8838e-06	5.14304e-06	5.87562e-06	6.62094e-06	6.72208e-06	6.95713e-06	8.12626e-06	1.12215e-05	1.27405e-05		Venezuela, Bolivarian Republic of	1.80872e-05	1.84695e-05	1.84178e-05	1.87455e-05
United Arab Emirates	262	441	580	638	766	949	1025	860	640	510	430	465	525	495	470	1.2	0.605449	0.495076	0.0171		0.0189		0.0003	0.0363	0.0363	0.531376		United Arab Emirates	7.29954e-07	1.21497e-06	1.54628e-06	1.67179e-06	1.98017e-06	2.49709e-06	2.94175e-06	2.35743e-06	1.75559e-06	1.39098e-06	1.15485e-06	1.20469e-06	1.29273e-06	1.26844e-06	1.23536e-06		United Arab Emirates	1.06854e-05	1.77853e-05	2.26351e-05	2.44724e-05
United States	25759	27048	28065	28931	28946	29497	30190	31305	32060	32425	30150	30620	31320	31745	31290	1.6165	0.81559	0.0386324	0.00384663	0.00711948	0.00861795	0.00118313	0.0003	0.0210672	0.0218799	0.0596996		United States	4.32576e-05	4.49161e-05	4.50987e-05	4.56944e-05	4.51027e-05	4.67827e-05	5.22257e-05	5.17242e-05	5.30084e-05	5.33052e-05	4.88071e-05	4.78154e-05	4.64847e-05	4.90318e-05	4.95725e-05		United States	0.000118029	0.000122554	0.000123052	0.000124678
United Kingdom	21390	21604	21817	22072	21987	22131	22225	25490	22745	20160	19970	18130	17985	17835	16835	1.56	0.787084	0.0195831	0.00451323	0.0013378	0.00457919	0.000575841	0.0017718	0.0127779	0.0134903	0.032361		United Kingdom	2.21472e-05	2.21195e-05	2.16156e-05	2.14939e-05	2.11229e-05	2.16413e-05	2.37049e-05	2.59671e-05	2.31868e-05	2.04341e-05	1.99318e-05	1.74556e-05	1.64579e-05	1.69844e-05	1.64446e-05		United Kingdom	5.31276e-05	5.30612e-05	5.18525e-05	5.15605e-05
Vietnam	33323	33183	32747	32537	32630	33580	34435	35140	36570	37475	38060	39470	42650	46085	50535	1.913	0.965187	0.208254	0.0259562	0	0	0.090939	0.0003	0.117195	0.132723	0.325449		Vietnam	0.000339453	0.000334259	0.000319206	0.00031173	0.000308412	0.000323064	0.000361346	0.000352195	0.000366782	0.000373708	0.000373736	0.000373879	0.00038398	0.000431781	0.000485656		Vietnam	0.000832367	0.000819633	0.000782722	0.000764389
Central African Republic	14	15	17	19	19	28	0	0	10	5	10	10	10	15	10	6.012	3.0333	0.4071	0.001	0.001	0.151		0.0003	0.1533	0.1533	0.5604		Central African Republic	1.64724e-07	1.74524e-07	1.91401e-07	2.10257e-07	2.07426e-07	3.11144e-07	0	0	1.15845e-07	5.75912e-08	1.1342e-07	1.09411e-07	1.03988e-07	1.62327e-07	1.11002e-07		Central African Republic	6.02163e-07	6.37985e-07	6.99681e-07	7.68609e-07
Cyprus	305	373	437	589	714	839	810	940	935	990	995	1030	1030	1070	1070	1.389	0.700807	0.4148	0.15		0.01		0.0003	0.1603	0.167094	0.5751		Cyprus	3.91155e-06	4.73032e-06	5.36284e-06	7.10444e-06	8.49624e-06	1.01621e-05	1.07009e-05	1.1861e-05	1.18061e-05	1.24291e-05	1.23008e-05	1.22833e-05	1.16746e-05	1.26212e-05	1.2946e-05		Cyprus	1.34627e-05	1.62807e-05	1.84577e-05	2.44519e-05
Number of non-German women in childbearing age in Germany	2180900	2233963	2319953	2433304	2565667	2766402	2948510	3102430	3178545	3244655	3264285	3342860	3822395	3931325	3963385	1.982												Sum significant variants	0.0046492	0.00467187	0.00463439	0.00470442	0.00485456	0.0054234	0.00645082	0.00644878	0.00674498	0.0069473	0.00689956	0.00688039	0.00693637	0.00756711	0.00798259		Sum all variants	0.0150622	0.0152317	0.015221	0.0155536
Number of all women in childbearing age in Germany	19118958	18607490	18459359	18311283	18167592	18126918	17968463	17804226	17649759	17491074	17307186	17209738	17213732	17275810	17335738
Share of non-German women in childbearing age	0.11407	0.120057	0.125679	0.132886	0.141222	0.152613	0.164094	0.174252	0.18009	0.185503	0.188609	0.194242	0.222055	0.227562	0.228625
Number of live births with non-German mother in Germany	113480	112358	114762	119806	130626	147905	184661	183883	189159	189689	186723	189789	191565	192319	194321
Total live births in Germany	677947	662685	673544	682069	714927	737575	792131	784884	787523	778090	773144	795492	738819	692989	677117
Live births with non-German mother % of all live births in Germany	0.167388	0.16955	0.170385	0.175651	0.182712	0.200529	0.233119	0.23428	0.240195	0.243788	0.241511	0.238581	0.259285	0.277521	0.286983
Fertility rate adjustment factor	1.46741	1.41224	1.35572	1.32182	1.29379	1.31397	1.42065	1.34449	1.33375	1.3142	1.28049	1.22826	1.16766	1.21954	1.25526
Fertility adjusted haemoglobinopathy carriage rate, significant variants	0.0046492	0.00467187	0.00463439	0.00470442	0.00485456	0.0054234	0.00645082	0.00644878	0.00674498	0.0069473	0.00689956	0.00688039	0.00693637	0.00756711	0.00798259
Fertility adjusted haemoglobinopathy carriage rate, all variants	0.0150622	0.0152317	0.015221	0.0155536	0.0161379	0.0179239	0.0213243	0.0213843	0.022552	0.0234601	0.0234068	0.0236508	0.0242316	0.0268629	0.0288311
Fertility adjusted haemoglobinopathy carriage rate (country weighted), significant variants	0.0047686	0.00480598	0.00479103	0.00489421	0.00510891	0.00585304	0.00724556	0.00732921	0.0077983	0.0081404	0.00812782	0.00817931	0.00833014	0.00916975	0.00977489
Fertility adjusted haemoglobinopathy carriage rate (country weighted), all variants	0.0161422	0.0163483	0.0163818	0.0167978	0.0175455	0.0198766	0.0245271	0.0247858	0.0264637	0.027793	0.0278457	0.0283684	0.0293741	0.032771	0.0354204
CF: haemoglobinopathies carrier frequency in pregnancies; SV: only significant variants; AV: any variant; TFR (2023): total fertility rate as published for the year 2023; Cw FRF: country-specific fertility-rate weighting factor
[truncated: 107 more columns]

## Sheet: S2
Baden-Württemberg	2010	2011	2012	2013	2014	2015	2016	2017	2018	2019	2020	2021	2022	2023	2024	TFR 2023	Cw FRF 20203	CF any alpha variant	CF A/ß-Thal.	CF A/HbC	CF A/HbS	CF A/HbE	CF other beta variants	CF any beta variant	CF, SV (a/b coincidence)	CF, AV (a/b coincidence)		significant variants	2010	2011	2012	2013	2014	2015	2016	2017	2018	2019	2020	2021	2022	2023	2024		all variants	2010	2011	2012	2013
Afghanistan	755	833	880	960	1038	1838	4220	4105	4265	4450	4590	5305	6780	7465	8140	4.84	2.44198	0.151944	0.03				0.0003	0.0303	0.0303	0.182244		Afghanistan	1.28232e-05	1.39891e-05	1.41498e-05	1.47762e-05	1.54609e-05	2.78033e-05	6.80716e-05	6.42149e-05	6.64009e-05	6.95609e-05	7.08605e-05	7.92863e-05	9.77052e-05	0.000111839	0.000122764		Afghanistan	7.71272e-05	8.41393e-05	8.51063e-05	8.88739e-05
Egypt	355	365	421	448	499	590	690	780	885	960	970	1105	1240	1375	1475	2.75	1.38749	0.161989	0.02		0.002		0.0003	0.0223	0.0223	0.184289		Egypt	4.43752e-06	4.51127e-06	4.9821e-06	5.07496e-06	5.47016e-06	6.56849e-06	8.19153e-06	8.98007e-06	1.01405e-05	1.10443e-05	1.10211e-05	1.21545e-05	1.31514e-05	1.5161e-05	1.6372e-05		Egypt	3.66721e-05	3.72816e-05	4.11726e-05	4.194e-05
Albania	537	574	635	741	925	2281	1885	2085	2490	3080	3580	4245	5050	5675	6095	1.348	0.680121	0.0879363	0.05	0	0.03	0	0.0003	0.0803	0.0803	0.168236		Albania	2.41711e-05	2.55463e-05	2.70592e-05	3.02262e-05	3.65134e-05	9.14428e-05	8.0582e-05	8.64374e-05	0.000102737	0.000127594	0.00014647	0.000168137	0.000192864	0.000225322	0.00024361		Albania	5.06409e-05	5.3522e-05	5.66917e-05	6.33268e-05
Algeria	588	635	663	684	700	757	785	780	805	825	820	875	1020	1180	1475	2.766	1.39556	0.346633	0.035	0.012	0.009		0.0003	0.0563	0.0563	0.402933		Algeria	1.85564e-05	1.98145e-05	1.98083e-05	1.9562e-05	1.93732e-05	2.12771e-05	2.35282e-05	2.26717e-05	2.32872e-05	2.39621e-05	2.35218e-05	2.42989e-05	2.7312e-05	3.28482e-05	4.13338e-05		Algeria	0.000132806	0.00014181	0.000141766	0.000140003
Andorra	0	0	1	1	1	1	10	20	5	5	5	5	5	5	5	1.082	0.545913	0	0.001				0.0003	0.0013	0.0013	0.0013		Andorra	0	0	6.89873e-10	6.60379e-10	6.39055e-10	6.49011e-10	6.92077e-09	1.34231e-08	3.33984e-09	3.35333e-09	3.31179e-09	3.20615e-09	3.09142e-09	3.21392e-09	3.23533e-09		Andorra	0	0	6.89873e-10	6.60379e-10
Angola	287	270	250	260	248	237	220	205	185	160	145	155	145	145	125	5.124	2.58527	0.406157	0.00075		0.247		0.0003	0.24805	0.24805	0.654207		Angola	3.99051e-05	3.71196e-05	3.29083e-05	3.27614e-05	3.02403e-05	2.93492e-05	2.90518e-05	2.62527e-05	2.35789e-05	2.04749e-05	1.83255e-05	1.89645e-05	1.71062e-05	1.7784e-05	1.54331e-05		Angola	0.000105246	9.78993e-05	8.67922e-05	8.64049e-05
Antigua and Barbuda	0	0	0	0	0	0	0	0	0	0	0	0	0	0	0	1.578	0.796165	0.213231	0.01	0.02	0.1		0.0003	0.1303	0.1303	0.343531		Antigua and Barbuda	0	0	0	0	0	0	0	0	0	0	0	0	0	0	0		Antigua and Barbuda	0	0	0	0
Equatorial Guinea	1	1	2	2	1	1	0	0	0	0	0	0	0	0	0	4.081	2.05903	0.4071	0.00075		0.2		0.0003	0.20105	0.20105	0.60815		Equatorial Guinea	1.12697e-07	1.11431e-07	2.13383e-07	2.0426e-07	9.88323e-08	1.00372e-07	0	0	0	0	0	0	0	0	0		Equatorial Guinea	3.40893e-07	3.37063e-07	6.45456e-07	6.1786e-07
Argentina	367	378	382	324	316	312	340	355	370	375	380	435	475	520	540	1.5	0.756811	0.0218768	0.01				0.0003	0.0103	0.0103	0.0321768		Argentina	2.1189e-06	2.15789e-06	2.08798e-06	1.69524e-06	1.6e-06	1.60436e-06	1.86435e-06	1.88776e-06	1.95817e-06	1.99265e-06	1.9942e-06	2.21002e-06	2.32689e-06	2.64827e-06	2.76845e-06		Argentina	6.61937e-06	6.74118e-06	6.52277e-06	5.29588e-06
Armenia	205	212	238	268	298	320	355	385	400	420	430	460	540	570	550	1.9	0.958628	0.019899	0.02				0.0003	0.0203	0.0203	0.040199		Armenia	2.33269e-06	2.38524e-06	2.56389e-06	2.76363e-06	2.97377e-06	3.24306e-06	3.8365e-06	4.03494e-06	4.17223e-06	4.39853e-06	4.44747e-06	4.606e-06	5.21357e-06	5.72127e-06	5.5573e-06		Armenia	4.6193e-06	4.72337e-06	5.07713e-06	5.47268e-06
Azerbaijan	236	253	277	295	270	304	305	345	365	380	415	460	600	720	765	1.55	0.782038	0.316272	0.054		0.006		0.0003	0.0603	0.0603	0.376572		Azerbaijan	7.97694e-06	8.45549e-06	8.86386e-06	9.03627e-06	8.00343e-06	9.15166e-06	9.79103e-06	1.07403e-05	1.1309e-05	1.18213e-05	1.27501e-05	1.36819e-05	1.72073e-05	2.1467e-05	2.29606e-05		Azerbaijan	4.98159e-05	5.28044e-05	5.53546e-05	5.64313e-05
Ethiopia	428	418	406	389	367	364	360	350	355	355	340	360	350	365	380	3.989	2.01261	0.0198931	0.005	0	0.001		0.0003	0.0063	0.0063	0.0261931		Ethiopia	1.51144e-06	1.45955e-06	1.35735e-06	1.24492e-06	1.13658e-06	1.14486e-06	1.20741e-06	1.13838e-06	1.14916e-06	1.1538e-06	1.09136e-06	1.1187e-06	1.04871e-06	1.13699e-06	1.1916e-06		Ethiopia	6.28402e-06	6.06825e-06	5.64337e-06	5.1759e-06
Australia	407	459	448	432	453	487	510	505	525	515	475	435	450	455	480	1.5	0.756811	0.0363039	0.00425757	8.18525e-05	0.00113573	0.00433954	5.97528e-05	0.00987444	0.0122397	0.0461784		Australia	2.79237e-06	3.11375e-06	2.90988e-06	2.68599e-06	2.72561e-06	2.97583e-06	3.32317e-06	3.19112e-06	3.30174e-06	3.25193e-06	2.96219e-06	2.62622e-06	2.61956e-06	2.75362e-06	2.92427e-06		Australia	1.05351e-05	1.17477e-05	1.09785e-05	1.01338e-05
Bahamas	0	0	0	0	0	1	0	0	0	0	0	0	0	0	0	1.373	0.692735	0.291373	0.01	0.03	0.14		0.0003	0.1803	0.1803	0.471673		Bahamas	0	0	0	0	0	9.00129e-08	0	0	0	0	0	0	0	0	0		Bahamas	0	0	0	0
Bahrain	1	3	4	3	7	6	0	0	0	0	0	0	5	5	5	1.824	0.920283	0.554856	0.029		0.138		0.0003	0.1673	0.167766	0.722156		Bahrain	9.40396e-08	2.78949e-07	3.56114e-07	2.55667e-07	5.77293e-07	5.02532e-07	0	0	0	0	0	0	3.9895e-07	4.14758e-07	4.17521e-07		Bahrain	4.04798e-07	1.20075e-06	1.53291e-06	1.10053e-06
Bangladesh	182	196	210	230	246	237	230	270	290	290	320	345	390	415	440	2.163	1.09132	0.495591	0.025			0.04	0.0003	0.0653	0.0653	0.560891		Bangladesh	6.6618e-06	7.09365e-06	7.2771e-06	7.62941e-06	7.89665e-06	7.72628e-06	7.99562e-06	9.10243e-06	9.73023e-06	9.76953e-06	1.06466e-05	1.11123e-05	1.21122e-05	1.33993e-05	1.43011e-05		Bangladesh	5.72212e-05	6.09306e-05	6.25063e-05	6.55324e-05
Barbados	6	5	5	7	5	5	0	0	0	0	0	0	0	0	0	1.708	0.861756	0.151943	0.005	0.046	0.07		0.0003	0.1213	0.1213	0.273243		Barbados	4.07962e-07	3.36149e-07	3.21852e-07	4.31329e-07	2.98144e-07	3.02789e-07	0	0	0	0	0	0	0	0	0		Barbados	9.18984e-07	7.57217e-07	7.25012e-07	9.71621e-07
Belarus	1255	1316	1368	1403	1411	1454	1475	1500	1525	1540	1560	1575	1685	1680	1605	1.208	0.609485	0	0.001				0.0003	0.0013	0.0013	0.0013		Belarus	9.14522e-07	9.482e-07	9.43746e-07	9.26511e-07	9.01707e-07	9.43662e-07	1.02081e-06	1.00673e-06	1.01865e-06	1.03282e-06	1.03328e-06	1.00994e-06	1.04181e-06	1.07988e-06	1.03854e-06		Belarus	9.14522e-07	9.482e-07	9.43746e-07	9.26511e-07
Belgium	582	561	580	604	616	633	650	640	665	630	605	610	625	605	590	1.47	0.741675	0.027938	0.00335428	0.000486604	0.00568933	0.000388821	0.0003	0.010219	0.0103997	0.0381571		Belgium	3.39274e-06	3.23359e-06	3.20092e-06	3.19086e-06	3.14917e-06	3.2865e-06	3.5987e-06	3.43622e-06	3.55348e-06	3.38006e-06	3.20572e-06	3.12911e-06	3.09133e-06	3.11098e-06	3.05406e-06		Belgium	1.24482e-05	1.18642e-05	1.17443e-05	1.17074e-05
Belize	2	3	2	2	2	3	0	0	0	0	0	0	0	0	0	2.007	1.01261	0.109808	0.00075	0.01	0.05		0.0003	0.06105	0.06105	0.170858		Belize	6.8442e-08	1.0151e-07	6.4795e-08	6.20248e-08	6.0022e-08	9.14357e-08	0	0	0	0	0	0	0	0	0		Belize	1.91545e-07	2.84091e-07	1.81339e-07	1.73586e-07
Benin	40	39	41	37	38	38	10	15	15	25	30	55	60	85	105	4.556	2.29869	0.406157	0.002	0.102	0.228		0.0003	0.3323	0.3323	0.738457		Benin	7.45071e-06	7.18283e-06	7.23003e-06	6.24571e-06	6.20739e-06	6.3041e-06	1.76906e-06	2.57337e-06	2.56114e-06	4.28581e-06	5.07926e-06	9.01495e-06	9.48259e-06	1.3966e-05	1.7367e-05		Benin	1.65574e-05	1.59621e-05	1.6067e-05	1.38796e-05
Bhutan	1	2	1	2	3	5	0	0	0	0	0	5	5	5	5	1.462	0.737639	0.95976	0.00075			0.04	0.0003	0.04105	0.04105	1.00081		Bhutan	2.30102e-08	4.55034e-08	2.17841e-08	4.17055e-08	6.05382e-08	1.02469e-07	0	0	0	0	0	1.0124e-07	9.76177e-08	1.01486e-07	1.02162e-07		Bhutan	5.60995e-07	1.10939e-06	5.31101e-07	1.01679e-06
Bolivia, Plurinational State of	124	115	121	114	125	126	120	125	145	150	140	155	175	190	210	2.547	1.28507	0.0590913	0.02				0.0003	0.0203	0.0203	0.0793913		Bolivia, Plurinational State of	1.41099e-06	1.29388e-06	1.30349e-06	1.17558e-06	1.24739e-06	1.27695e-06	1.29685e-06	1.31005e-06	1.51243e-06	1.5709e-06	1.44801e-06	1.55202e-06	1.68958e-06	1.90709e-06	2.12188e-06		Bolivia, Plurinational State of	5.51825e-06	5.06024e-06	5.09781e-06	4.59756e-06
Bosnia and Herzegovina	8590	8597	8645	8541	8931	9334	9600	10160	10900	11695	12210	12755	13265	13825	14010	1.486	0.749748	0.0198911	0.015				0.0003	0.0153	0.0153	0.0351911		Bosnia and Herzegovina	7.36702e-05	7.29019e-05	7.01911e-05	6.63819e-05	6.71717e-05	7.12965e-05	7.81941e-05	8.02538e-05	8.569e-05	9.23112e-05	9.51823e-05	9.62592e-05	9.65259e-05	0.000104587	0.000106693		Bosnia and Herzegovina	0.000169447	0.00016768	0.000161445	0.000152683
Botswana	4	6	7	5	6	8	0	0	0	0	0	0	0	0	0	2.732	1.37841	0.124804	0.00075		0		0.0003	0.00105	0.00105	0.125854		Botswana	2.35427e-09	3.49174e-09	3.90044e-09	2.66691e-09	3.09696e-09	4.19361e-09	0	0	0	0	0	0	0	0	0		Botswana	2.82185e-07	4.18523e-07	4.6751e-07	3.19659e-07
Brazil	3730	3710	3719	3608	3642	3661	3770	3930	4040	4155	4015	4000	4235	4385	4360	1.619	0.816852	0.0596709	0.01	0.00616	0.02684		0.0003	0.0433	0.0433	0.102971		Brazil	9.05324e-05	8.90354e-05	8.54555e-05	7.93604e-05	7.75216e-05	7.91401e-05	8.69041e-05	8.78538e-05	8.98838e-05	9.28157e-05	8.85773e-05	8.54315e-05	8.72141e-05	9.38813e-05	9.39679e-05		Brazil	0.000215293	0.000211733	0.00020322	0.000188726
British Overseas Territories	0	0	0	9	9	9	0	0	0	0	10	5	0	0	0	n.a.		0.172628	0.01	0.02	0.08		0.0003	0.1103	0.1103	0.282928		British Overseas Territories	0	0	0	5.04275e-07	4.87992e-07	4.95595e-07	0	0	0	0	5.61985e-07	2.72029e-07	0	0	0		British Overseas Territories	0	0	0	1.2935e-06
Brunei Darussalam	10	11	13	8	9	8	0	0	0	0	0	0	0	0	0	1.747	0.881433	0.2431	0.03			0.01	0.0003	0.0403	0.0403	0.2834		Brunei Darussalam	2.25898e-07	2.45696e-07	2.78019e-07	1.63774e-07	1.78296e-07	1.60955e-07	0	0	0	0	0	0	0	0	0		Brunei Darussalam	1.58857e-06	1.7278e-06	1.9551e-06	1.1517e-06
Bulgaria	4500	5156	6179	7130	8713	10149	11195	12035	12990	13775	14380	14980	15300	15345	14900	1.81	0.913219	0	0.03				0.0003	0.0303	0.0303	0.0303		Bulgaria	7.64297e-05	8.65877e-05	9.93543e-05	0.000109744	0.000129779	0.000153523	0.000180583	0.000188265	0.000202239	0.000215326	0.000221999	0.000223885	0.000220485	0.000229896	0.000224716		Bulgaria	7.64297e-05	8.65877e-05	9.93543e-05	0.000109744
Burkina Faso	34	36	39	38	41	46	20	35	30	30	40	40	60	65	85	4.186	2.11201	0.405591	0.012	0.167	0.086		0.0003	0.2653	0.2653	0.670891		Burkina Faso	5.05619e-06	5.29347e-06	5.4907e-06	5.12119e-06	5.34707e-06	6.09262e-06	2.82474e-06	4.79386e-06	4.0895e-06	4.10602e-06	5.40687e-06	5.23441e-06	7.57066e-06	8.52653e-06	1.12244e-05		Burkina Faso	1.27861e-05	1.33861e-05	1.38849e-05	1.29505e-05
Burundi	8	6	6	8	9	11	0	0	0	0	0	5	105	45	25	4.878	2.46115	0.382204	0.00075		0.189		0.0003	0.19005	0.19005	0.572254		Burundi	8.52246e-07	6.32004e-07	6.05125e-07	7.72338e-07	8.40824e-07	1.04368e-06	0	0	0	0	0	4.68714e-07	9.49079e-06	4.22865e-06	2.3649e-06		Burundi	2.56617e-06	1.90301e-06	1.82207e-06	2.32557e-06
Cape Verde	9	9	6	7	9	11	5	0	0	0	0	0	0	0	5	1.522	0.767911	0.36	0.00075		0.042		0.0003	0.04305	0.04305	0.40305		Cape Verde	2.17182e-07	2.14742e-07	1.37072e-07	1.53081e-07	1.90463e-07	2.36415e-07	1.14592e-07	0	0	0	0	0	0	0	1.07139e-07		Cape Verde	2.03333e-06	2.01049e-06	1.28332e-06	1.4332e-06
Chile	348	359	372	361	377	385	395	405	435	460	410	445	485	485	515	1.167	0.588799	0.0198931	0.01				0.0003	0.0103	0.0103	0.0301931		Chile	2.0092e-06	2.04943e-06	2.03332e-06	1.88884e-06	1.90886e-06	1.97973e-06	2.16593e-06	2.15364e-06	2.30218e-06	2.44432e-06	2.15164e-06	2.26083e-06	2.37588e-06	2.47002e-06	2.64028e-06		Chile	5.88971e-06	6.00762e-06	5.96041e-06	5.53687e-06
China	5464	5844	6536	7089	7902	8715	9580	10180	10520	10705	10135	9990	10235	10715	11170	0.999	0.504036	0.112521	0.0101174	0	0	0.000210548	0.0003	0.010628	0.0241609	0.123149		China	7.39998e-05	7.82571e-05	8.38012e-05	8.70056e-05	9.38522e-05	0.000105121	0.000123222	0.000126982	0.000130599	0.000133433	0.000124763	0.000119055	0.00011761	0.000128005	0.000134329		China	0.000377179	0.000398878	0.000427137	0.00044347
Costa Rica	61	57	68	67	74	88	95	105	85	90	85	95	120	135	130	1.33	0.671039	0.0446649	0.00075	0.002	0.02		0.0003	0.02305	0.02305	0.0677149		Costa Rica	7.88148e-07	7.28193e-07	8.31774e-07	7.84504e-07	8.38489e-07	1.01266e-06	1.16575e-06	1.24951e-06	1.0067e-06	1.07023e-06	9.98249e-07	1.0801e-06	1.31552e-06	1.5386e-06	1.49149e-06		Costa Rica	2.31538e-06	2.13924e-06	2.44354e-06	2.30467e-06
Côte d'Ivoire	86	91	93	110	112	126	125	140	160	150	150	175	180	220	260	4.283	2.16095	0.389764	0.039	0.063	0.084		0.0003	0.1863	0.1863	0.576064		Côte d'Ivoire	8.98087e-06	9.39626e-06	9.19436e-06	1.04101e-05	1.02571e-05	1.1719e-05	1.23975e-05	1.34655e-05	1.5316e-05	1.44167e-05	1.42381e-05	1.60813e-05	1.59489e-05	2.02655e-05	2.41097e-05		Côte d'Ivoire	2.777e-05	2.90545e-05	2.84302e-05	3.21894e-05
Denmark	326	338	354	361	339	331	325	330	340	310	325	315	320	295	290	1.5	0.756811		0.00225396	8.50554e-05	0.000687419	0.000628425	0.0003	0.00395486	0.00417812	0.00395486		Denmark	7.63495e-07	7.82706e-07	7.84893e-07	7.66193e-07	6.96267e-07	6.90428e-07	7.22896e-07	7.11829e-07	7.29915e-07	6.68198e-07	6.91852e-07	6.49175e-07	6.35882e-07	6.09431e-07	6.03093e-07		Denmark	7.22697e-07	7.40882e-07	7.42952e-07	7.25251e-07
Dominica	9	10	12	7	8	10	0	0	0	0	0	0	0	0	0	1.484	0.748739	0.328911	0.0075	0.015	0.16		0.0003	0.1828	0.1828	0.511711		Dominica	9.22202e-07	1.01316e-06	1.16408e-06	6.50016e-07	7.18888e-07	9.1261e-07	0	0	0	0	0	0	0	0	0		Dominica	2.58152e-06	2.83613e-06	3.25861e-06	1.81959e-06
Dominican Republic	552	566	575	552	550	543	545	525	495	475	475	450	435	435	395	2.243	1.13169	0.252813	0.01	0.03	0.12		0.0003	0.1603	0.1603	0.413113		Dominican Republic	4.95998e-05	5.02864e-05	4.89133e-05	4.49492e-05	4.33402e-05	4.34552e-05	4.65094e-05	4.34483e-05	4.0771e-05	3.92816e-05	3.8795e-05	3.55808e-05	3.31641e-05	3.44782e-05	3.15163e-05		Dominican Republic	0.000127825	0.000129594	0.000126056	0.00011584
Djibouti	5	4	4	5	7	7	0	0	0	0	0	0	0	0	0	2.609	1.31635	0.0196773	0.00075				0.0003	0.00105	0.00105	0.0207273		Djibouti	2.94284e-09	2.32782e-09	2.22882e-09	2.66691e-09	3.61312e-09	3.66941e-09	0	0	0	0	0	0	0	0	0		Djibouti	5.80923e-08	4.59518e-08	4.39974e-08	5.26455e-08
Ecuador	273	278	289	273	263	253	255	290	285	295	265	285	290	345	380	1.823	0.919778	0.0224466	0.01		0.01		0.0003	0.0203	0.0203	0.0427466		Ecuador	3.10646e-06	3.12782e-06	3.11329e-06	2.81519e-06	2.6245e-06	2.56404e-06	2.7558e-06	3.03931e-06	2.97271e-06	3.08945e-06	2.74089e-06	2.85372e-06	2.79988e-06	3.46287e-06	3.83959e-06		Ecuador	6.54141e-06	6.58639e-06	6.55579e-06	5.92808e-06
El Salvador	42	53	58	58	65	72	75	80	95	100	95	125	135	135	130	1.775	0.89556	0.0340384	0.00075		0.0152		0.0003	0.01625	0.01625	0.0502884		El Salvador	3.82569e-07	4.77342e-07	5.00158e-07	4.78775e-07	5.19232e-07	5.8411e-07	6.48822e-07	6.71156e-07	7.93212e-07	8.38332e-07	7.86549e-07	1.00192e-06	1.04336e-06	1.0847e-06	1.05148e-06		El Salvador	1.18393e-06	1.47722e-06	1.54782e-06	1.48165e-06
Eritrea	364	353	361	345	522	849	1390	1560	1665	1750	1740	1800	1935	1990	2040	3.713	1.87336	0.0198931	0.005		0.001		0.0003	0.0063	0.0063	0.0261931		Eritrea	1.28543e-06	1.23258e-06	1.20691e-06	1.1041e-06	1.61661e-06	2.67028e-06	4.66194e-06	5.07394e-06	5.38973e-06	5.68776e-06	5.5852e-06	5.5935e-06	5.79785e-06	6.19891e-06	6.39699e-06		Eritrea	5.34435e-06	5.12462e-06	5.01787e-06	4.59045e-06
Estonia	387	405	421	443	442	458	440	445	460	465	455	440	425	405	405	1.31	0.660949	0	0.001				0.0003	0.0013	0.0013	0.0013		Estonia	2.82008e-07	2.91809e-07	2.90436e-07	2.92548e-07	2.82462e-07	2.97247e-07	3.04514e-07	2.98665e-07	3.07265e-07	3.11859e-07	3.01373e-07	2.82141e-07	2.62771e-07	2.60327e-07	2.62062e-07		Estonia	2.82008e-07	2.91809e-07	2.90436e-07	2.92548e-07
Eswatini	3	3	3	3	3	2	0	0	0	0	0	0	0	0	0	2.753	1.389	0.125125	0.00075		0.005		0.0003	0.00605	0.00605	0.131175		Eswatini	1.01738e-08	1.00595e-08	9.63169e-09	9.2199e-09	8.92219e-09	6.0408e-09	0	0	0	0	0	0	0	0	0		Eswatini	2.20586e-07	2.18108e-07	2.08832e-07	1.99904e-07
Fiji	4	2	2	2	1	1	0	0	0	0	0	0	0	0	0	2.281	1.15086	0.351975	0.00075				0.0003	0.00105	0.00105	0.353025		Fiji	2.35427e-09	1.16391e-09	1.11441e-09	1.06677e-09	5.1616e-10	5.24201e-10	0	0	0	0	0	0	0	0	0		Fiji	7.9154e-07	3.91324e-07	3.74681e-07	3.58662e-07
Finland	548	547	556	575	575	589	620	630	620	565	515	530	500	485	500	1.26	0.635721	0.00254627	0.00132379	3.54355e-05	0.000261161	0.000288624	0.0003	0.00220901	0.00232607	0.00475527		Finland	7.14514e-07	7.05198e-07	6.86315e-07	6.79424e-07	6.57485e-07	6.83986e-07	7.67761e-07	7.56561e-07	7.41015e-07	6.78007e-07	6.10351e-07	6.08092e-07	5.53144e-07	5.5781e-07	5.78893e-07		Finland	1.46071e-06	1.44166e-06	1.40306e-06	1.38897e-06
France	7817	7910	8171	8345	8349	8506	8460	8290	8295	7995	7750	7550	7345	7120	7005	1.66	0.837538	0.0311626	0.00305514	0.000636213	0.00540286	0.00145195	0.0003	0.0108462	0.0110525	0.0420087		France	4.84292e-05	4.84549e-05	4.79249e-05	4.68529e-05	4.53617e-05	4.69348e-05	4.97785e-05	4.73037e-05	4.71074e-05	4.5587e-05	4.36426e-05	4.11602e-05	3.86098e-05	3.89101e-05	3.85366e-05		France	0.000184072	0.000184169	0.000182155	0.00017808
Gabon	17	19	20	19	18	26	5	15	5	10	5	5	10	5	5	3.647	1.84006	0.6864	0.00075	0.001	0.252		0.0003	0.25405	0.25405	0.94045		Gabon	2.42089e-06	2.67531e-06	2.69634e-06	2.45201e-06	2.24795e-06	3.29763e-06	6.76239e-07	1.96739e-06	6.52682e-07	1.31063e-06	6.47199e-07	6.26555e-07	1.20827e-06	6.28074e-07	6.32258e-07		Gabon	8.96173e-06	9.90353e-06	9.9814e-06	9.07693e-06
Gambia	148	156	172	207	258	343	440	485	485	500	540	565	620	690	780	4.006	2.02119	0.389764	0.00075	0.016	0.136		0.0003	0.15305	0.15305	0.542814		Gambia	1.2697e-05	1.3233e-05	1.39697e-05	1.60936e-05	1.9411e-05	2.62081e-05	3.58507e-05	3.83226e-05	3.81406e-05	3.9479e-05	4.21091e-05	4.26532e-05	4.51305e-05	5.2216e-05	5.942e-05		Gambia	4.50319e-05	4.69328e-05	4.95456e-05	5.70783e-05
Georgia	1317	1338	1425	1581	1637	1788	1980	2055	2155	2235	2240	2360	2830	3060	2875	1.81	0.913219	0.019899	0.03				0.0003	0.0303	0.0303	0.050199		Georgia	2.23684e-05	2.24698e-05	2.29131e-05	2.43346e-05	2.43829e-05	2.7047e-05	3.19388e-05	3.21466e-05	3.35507e-05	3.49368e-05	3.45812e-05	3.52716e-05	4.07825e-05	4.58443e-05	4.33596e-05		Georgia	3.70585e-05	3.72265e-05	3.79608e-05	4.03159e-05
Ghana	662	640	635	638	646	632	665	660	645	680	660	650	660	655	645	3.397	1.71393	0.405968	0.003	0.112	0.158		0.0003	0.2733	0.2733	0.679268		Ghana	0.000101416	9.69439e-05	9.20956e-05	8.85748e-05	8.67895e-05	8.62314e-05	9.67548e-05	9.31245e-05	9.05757e-05	9.58763e-05	9.19036e-05	8.7624e-05	8.57884e-05	8.85121e-05	8.77414e-05		Ghana	0.000252062	0.000240947	0.000228897	0.000220146
Grenada	2	2	2	3	3	4	0	0	0	0	0	0	0	0	0	1.487	0.750252	0.213231	0.01	0.02	0.1		0.0003	0.1303	0.1303	0.343531		Grenada	1.46077e-07	1.44436e-07	1.38293e-07	1.98571e-07	1.92159e-07	2.60204e-07	0	0	0	0	0	0	0	0	0		Grenada	3.85126e-07	3.808e-07	3.64604e-07	5.23524e-07
Greece	17433	17724	18781	19720	20371	20650	20700	20645	20495	19960	19395	18760	18130	17500	16805	1.32	0.665994	0.00957832	0.00468454	2.35023e-05	0.00245686	4.03832e-05	3.20226e-05	0.0072373	0.00727335	0.0168156		Greece	7.10745e-05	7.14491e-05	7.24901e-05	7.28603e-05	7.28353e-05	7.49831e-05	8.01523e-05	7.75228e-05	7.6594e-05	7.48958e-05	7.18742e-05	6.73035e-05	6.27159e-05	6.29353e-05	6.08384e-05		Greece	0.000164321	0.000165187	0.000167594	0.000168449
Guatemala	35	35	41	42	47	45	20	30	30	50	55	50	70	90	95	2.311	1.16599	0.0336926	0.00075				0.0003	0.00105	0.00105	0.0347426		Guatemala	2.05999e-08	2.03685e-08	2.28454e-08	2.24021e-08	2.42595e-08	2.35891e-08	1.11797e-08	1.62626e-08	1.61854e-08	2.70846e-08	2.94239e-08	2.58958e-08	3.49569e-08	4.67254e-08	4.96499e-08		Guatemala	6.81613e-07	6.73956e-07	7.55914e-07	7.41245e-07
Guinea	44	48	45	57	60	64	60	115	215	250	230	235	245	295	320	4.217	2.12765	0.405205	0.00075		0.227		0.0003	0.22805	0.22805	0.633255		Guinea	5.62458e-06	6.06697e-06	5.44588e-06	6.6032e-06	6.7263e-06	7.2865e-06	7.28438e-06	1.35397e-05	2.5193e-05	2.94125e-05	2.67243e-05	2.64343e-05	2.6573e-05	3.32639e-05	3.63233e-05		Guinea	1.56185e-05	1.68469e-05	1.51223e-05	1.83359e-05
Guinea-Bissau	2	3	3	2	3	3	0	0	0	0	0	0	0	0	0	3.836	1.93542	0.405205	0.00075	0.002	0.076		0.0003	0.07905	0.07905	0.484255		Guinea-Bissau	8.86215e-08	1.31439e-07	1.25849e-07	8.03122e-08	1.16578e-07	1.18395e-07	0	0	0	0	0	0	0	0	0		Guinea-Bissau	5.42889e-07	8.05186e-07	7.70941e-07	4.91987e-07
Guyana	1	2	2	1	1	1	0	0	0	0	0	0	0	0	0	2.412	1.21695	0.109685	0.00075	0.01	0.05		0.0003	0.06105	0.06105	0.170735		Guyana	3.4221e-08	6.76732e-08	6.4795e-08	3.10124e-08	3.0011e-08	3.04786e-08	0	0	0	0	0	0	0	0	0		Guyana	9.5704e-08	1.89258e-07	1.81209e-07	8.67307e-08
Haiti	26	25	22	20	19	21	10	10	10	15	15	5	5	10	10	2.656	1.34006	0.213231	0.01	0.03	0.1		0.0003	0.1403	0.1403	0.353531		Haiti	2.04474e-06	1.94401e-06	1.63797e-06	1.4254e-06	1.31041e-06	1.47091e-06	7.46911e-07	7.24332e-07	7.20891e-07	1.0857e-06	1.07225e-06	3.46017e-07	3.33636e-07	6.93712e-07	6.98333e-07		Haiti	5.15238e-06	4.89856e-06	4.12739e-06	3.59176e-06
Honduras	47	49	51	51	59	63	45	60	60	75	70	90	100	100	105	2.5	1.26135	0.0336926	0.00075	0.0004	0.0016		0.0003	0.00305	0.00305	0.0367426		Honduras	8.03535e-08	8.28317e-08	8.25459e-08	7.90168e-08	8.846e-08	9.59289e-08	7.30674e-08	9.44781e-08	9.40293e-08	1.18011e-07	1.08779e-07	1.35398e-07	1.45059e-07	1.50807e-07	1.59402e-07		Honduras	9.68e-07	9.97854e-07	9.94411e-07	9.51897e-07
Hong Kong	0	0	0	0	1	24	25	45	80	80	75	95	110	130	135	0.751	0.37891	0.201389	0.03				0.0003	0.0303	0.07727	0.231689		Hong Kong	0	0	0	0	3.79844e-08	9.2583e-07	1.0284e-06	1.79516e-06	3.17624e-06	3.18907e-06	2.95271e-06	3.6208e-06	4.04249e-06	4.96679e-06	5.19218e-06		Hong Kong	0	0	0	0
India	2048	2397	2776	3155	3528	4225	4825	5470	6365	7390	7545	8565	10415	12535	14555	1.975	0.996468	0.495591	0.0156702	0	0.0193568	0.00972176	0.0003	0.0450487	0.0450487	0.54064		India	5.17153e-05	5.98482e-05	6.63632e-05	7.2199e-05	7.81278e-05	9.50206e-05	0.000115715	0.000127218	0.000147331	0.000171747	0.000173177	0.000190318	0.000223145	0.000279208	0.000326362		India	0.000620648	0.000718252	0.00079644	0.000866477
Indonesia	744	797	856	1013	1072	1079	1115	1195	1210	1290	1260	1355	1600	1920	2200	2.127	1.07316	0.0784	0.039651	0	0	0.0187238	0.0003	0.0586748	0.0586748	0.137075		Indonesia	2.44699e-05	2.59186e-05	2.66533e-05	3.01933e-05	3.09201e-05	3.16069e-05	3.48287e-05	3.61993e-05	3.64795e-05	3.90485e-05	3.76679e-05	3.92158e-05	4.46496e-05	5.57025e-05	6.4251e-05		Indonesia	5.7166e-05	6.05504e-05	6.22669e-05	7.0537e-05
Iraq	2600	2734	2820	2879	2918	4172	6725	7090	7290	7455	7445	7720	8100	8135	8045	3.249	1.63925	0.231914	0.03		0.03		0.0003	0.0603	0.0603	0.292214		Iraq	8.78816e-05	9.13727e-05	9.02386e-05	8.81878e-05	8.64963e-05	0.000125594	0.000215884	0.000220721	0.000225869	0.000231914	0.000228734	0.000229617	0.000232299	0.000242547	0.000241462		Iraq	0.000425875	0.000442793	0.000437296	0.000427359
Iran, Islamic Republic of	1346	1467	1635	1762	1800	1964	2555	2730	3010	3150	3185	3460	3900	4345	4690	1.695	0.855197	0.125064	0.03		0.01		0.0003	0.0403	0.0403	0.165364		Iran, Islamic Republic of	3.04059e-05	3.27669e-05	3.49662e-05	3.60712e-05	3.56593e-05	3.95144e-05	5.4816e-05	5.68e-05	6.23281e-05	6.54905e-05	6.53978e-05	6.87783e-05	7.47506e-05	8.65798e-05	9.40769e-05		Iran, Islamic Republic of	0.000124765	0.000134453	0.000143478	0.000148012
Ireland	422	434	439	465	482	480	500	495	495	495	475	500	475	470	495	1.5	0.756811	0.0113288	0.00141037	0.000200032	0.000962482	0.000135415	0.0003	0.0030083	0.00317552	0.0143371		Ireland	7.51164e-07	7.63845e-07	7.39784e-07	7.50097e-07	7.52414e-07	7.60966e-07	8.45271e-07	8.11522e-07	8.07667e-07	8.10929e-07	7.68524e-07	7.83168e-07	7.17387e-07	7.37963e-07	7.82393e-07		Ireland	3.39142e-06	3.44867e-06	3.34004e-06	3.3866e-06
Iceland	71	76	71	67	72	70	60	65	45	50	55	70	60	55	55	1.59	0.80222	0	0.001				0.0003	0.0013	0.0013	0.0013		Iceland	5.17379e-08	5.47593e-08	4.8981e-08	4.42454e-08	4.6012e-08	4.54308e-08	4.15246e-08	4.36252e-08	3.00585e-08	3.35333e-08	3.64296e-08	4.48861e-08	3.70971e-08	3.53531e-08	3.55886e-08		Iceland	5.17379e-08	5.47593e-08	4.8981e-08	4.42454e-08
Israel	270	277	289	294	309	357	375	385	400	395	380	380	450	440	510	2.85	1.43794	0.0591	0.005				0.0003	0.0053	0.0053	0.0644		Israel	8.02134e-07	8.13685e-07	8.12829e-07	7.9154e-07	8.05062e-07	9.44611e-07	1.05808e-06	1.05346e-06	1.0893e-06	1.08003e-06	1.02614e-06	9.93413e-07	1.13431e-06	1.15306e-06	1.3454e-06		Israel	9.74668e-06	9.88704e-06	9.87664e-06	9.61796e-06
Italy	42759	42595	43058	44467	45619	46637	46645	46430	46290	45425	44270	42970	41570	40490	39070	1.2	0.605449	0.00568991	0.0319977	0.000175553	0.00223009	7.49446e-05	0.0003	0.0347783	0.0348457	0.0404682		Italy	0.000835188	0.000822638	0.000796212	0.000787113	0.00078143	0.000811314	0.000865298	0.000835273	0.000828798	0.000816595	0.000785973	0.000738558	0.000688929	0.00069762	0.000677638		Italy	0.000969947	0.000955373	0.000924683	0.000914115
Jamaica	72	75	72	69	74	72	55	70	65	45	55	60	50	50	40	1.358	0.685166	0.251775	0.01	0.04	0.11		0.0003	0.1603	0.1603	0.412075		Jamaica	6.46954e-06	6.6634e-06	6.1248e-06	5.61865e-06	5.83123e-06	5.76202e-06	4.69361e-06	5.79311e-06	5.35376e-06	3.72142e-06	4.49206e-06	4.74411e-06	3.81196e-06	3.96301e-06	3.19153e-06		Jamaica	1.66309e-05	1.71292e-05	1.57447e-05	1.44436e-05
Japan	1500	1591	1681	1740	1742	1728	1770	1785	1830	1785	1590	1600	1695	1695	1610	1.2	0.605449	0	0.00075				0.0003	0.00105	0.00105	0.00105		Japan	8.82852e-07	9.25892e-07	9.36662e-07	9.28086e-07	8.9915e-07	9.0582e-07	9.89404e-07	9.67627e-07	9.87308e-07	9.66919e-07	8.50619e-07	8.28666e-07	8.46456e-07	8.79996e-07	8.41434e-07		Japan	8.82852e-07	9.25892e-07	9.36662e-07	9.28086e-07
Yemen	29	37	42	45	40	45	50	65	90	90	85	90	100	95	115	4.59	2.31584	0.556721	0.0236		0.0095		0.0003	0.0334	0.0334	0.590121		Yemen	5.4294e-07	6.84934e-07	7.44426e-07	7.63499e-07	6.56752e-07	7.50357e-07	8.89053e-07	1.12083e-06	1.54455e-06	1.55078e-06	1.44649e-06	1.48272e-06	1.58852e-06	1.56889e-06	1.91183e-06		Yemen	9.59283e-06	1.21016e-05	1.31527e-05	1.34897e-05
Jordan	260	272	288	300	306	335	380	410	415	450	425	470	485	525	540	2.639	1.33148	0.240555	0.035		0.0022		0.0003	0.0375	0.0375	0.278055		Jordan	5.46527e-06	5.65329e-06	5.73125e-06	5.71482e-06	5.64089e-06	6.2717e-06	7.58623e-06	7.93771e-06	7.99634e-06	8.70575e-06	8.12024e-06	8.69359e-06	8.65004e-06	9.73447e-06	1.00793e-05		Jordan	4.05239e-05	4.1918e-05	4.24961e-05	4.23743e-05
Yugoslavia, Federal Republic of (April 27, 1992-February 4, 2003)	3073	1874	1523	1306	1276	1331	1255	1120	1035	965	895	790	735	645	545	n.a.												Yugoslavia, Federal Republic of (April 27, 1992-February 4, 2003)																	Yugoslavia, Federal Republic of (April 27, 1992-February 4, 2003)
Yugoslavia, Socialist Federal Republic (until 04/26/1992)	0	0	0	0	0	0	0	0	0	0	0	0	0	0	0	n.a.												Yugoslavia, Socialist Federal Republic (until 04/26/1992)																	Yugoslavia, Socialist Federal Republic (until 04/26/1992)
Cambodia	126	128	133	141	133	131	145	145	155	160	155	140	150	140	155	2.579	1.30121	0.4228	0.03			0.3	0.0003	0.3303	0.343876	0.7531		Cambodia	2.42873e-05	2.43957e-05	2.42705e-05	2.46304e-05	2.24827e-05	2.24896e-05	2.65449e-05	2.57425e-05	2.73871e-05	2.83847e-05	2.7157e-05	2.37465e-05	2.45323e-05	2.38041e-05	2.65301e-05		Cambodia	5.31901e-05	5.34273e-05	5.31533e-05	5.39413e-05
Cameroon	922	978	1069	1176	1252	1441	1670	1735	1795	1920	1880	1930	2135	2525	2920	4.322	2.18063	0.406346	0.002	0.003	0.2		0.0003	0.2053	0.2053	0.611646		Cameroon	0.000106103	0.000111283	0.000116464	0.000122644	0.000126354	0.000147694	0.000182523	0.000183894	0.00018935	0.000203354	0.000196651	0.000195441	0.000208464	0.000256314	0.000298385		Cameroon	0.00031611	0.000331543	0.000346979	0.00036539
Canada	717	778	761	753	803	805	795	840	875	870	790	790	805	865	885	1.26	0.635721	0.0408197	0.00503104	0.000969899	0.00475696	0.00246564	0.000299766	0.0135233	0.0152271	0.054343		Canada	6.11991e-06	6.56597e-06	6.14935e-06	5.82456e-06	6.01075e-06	6.1196e-06	6.44461e-06	6.60356e-06	6.84603e-06	6.8344e-06	6.12907e-06	5.93357e-06	5.82988e-06	6.51263e-06	6.7076e-06		Canada	2.18409e-05	2.34328e-05	2.19459e-05	2.07868e-05
Kazakhstan	3430	3308	3167	3070	2994	2917	2870	2840	2845	2760	2650	2580	2530	2450	2300	3.012	1.51968	0.0687378	0.00075				0.0003	0.00105	0.00105	0.0697878		Kazakhstan	2.01879e-06	1.92511e-06	1.76467e-06	1.63749e-06	1.54538e-06	1.5291e-06	1.60429e-06	1.53953e-06	1.53491e-06	1.49507e-06	1.4177e-06	1.33622e-06	1.26344e-06	1.27197e-06	1.20205e-06		Kazakhstan	0.000134178	0.000127952	0.000117288	0.000108835
Qatar	21	18	18	19	15	12	0	0	15	0	0	0	5	0	0	1.729	0.872351	0.231914	0.03		0.03		0.0003	0.0603	0.0603	0.292214		Qatar	7.09813e-07	6.01576e-07	5.75991e-07	5.81997e-07	4.44635e-07	3.6125e-07	0	0	4.64751e-07	0	0	0	1.43395e-07	0	0		Qatar	3.43976e-06	2.91524e-06	2.79125e-06	2.82036e-06
Kenya	1169	1222	1221	1235	1206	1206	1215	1210	1215	1160	1125	1120	1145	1170	1175	3.208	1.61857	0.406911	0.0015		0.1666		0.0003	0.1684	0.1684	0.575311		Kenya	0.000110348	0.000114055	0.000109115	0.000105647	9.98353e-05	0.000101391	0.000108925	0.000105198	0.000105131	0.000100777	9.65258e-05	9.30316e-05	9.17049e-05	9.74203e-05	9.84884e-05		Kenya	0.000376986	0.00038965	0.000372773	0.000360927
Kyrgyzstan	617	615	601	597	586	575	560	570	615	635	625	685	780	885	950	2.7	1.36226	0.0678496	0.00075				0.0003	0.00105	0.00105	0.0688996		Kyrgyzstan	3.63146e-07	3.57903e-07	3.3488e-07	3.1843e-07	3.0247e-07	3.01416e-07	3.13032e-07	3.0899e-07	3.318e-07	3.43974e-07	3.34363e-07	3.54773e-07	3.89519e-07	4.59467e-07	4.96499e-07		Kyrgyzstan	2.38292e-05	2.34851e-05	2.19744e-05	2.08949e-05
Kiribati	0	1	1	0	0	0	0	0	0	0	0	0	0	0	0	3.147	1.58779	0.0199	0.00075				0.0003	0.00105	0.00105	0.02095		Kiribati	0	5.81956e-10	5.57205e-10	0	0	0	0	0	0	0	0	0	0	0	0		Kiribati	0	1.16114e-08	1.11176e-08	0
Colombia	765	818	876	896	974	1006	1065	1205	1290	1365	1350	1425	1610	1830	1955	1.645	0.82997	0.0759438	0.00860084	0.0254645	0.0328902	0.000187691	0.0003	0.0674432	0.0701326	0.143387		Colombia	3.00738e-05	3.17961e-05	3.26024e-05	3.19211e-05	3.35795e-05	3.5223e-05	3.97631e-05	4.36302e-05	4.6486e-05	4.93873e-05	4.82395e-05	4.92953e-05	5.37021e-05	6.34589e-05	6.82452e-05		Colombia	6.14863e-05	6.50075e-05	6.6656e-05	6.52631e-05
Comoros	3	3	2	3	6	4	0	0	0	0	0	0	0	0	0	3.878	1.95661	0.234375	0.01		0.008		0.0003	0.0183	0.0183	0.252675		Comoros	3.07737e-08	3.0428e-08	1.94226e-08	2.78883e-08	5.39756e-08	3.65443e-08	0	0	0	0	0	0	0	0	0		Comoros	4.24904e-07	4.20131e-07	2.68175e-07	3.85064e-07
Congo, Democratic Republic	305	290	298	279	259	242	225	215	200	175	160	185	195	190	180	6.051	3.05298	0.690864	0.00075		0.186		0.0003	0.18705	0.18705	0.877914		Congo, Democratic Republic	3.1979e-05	3.00647e-05	2.95801e-05	2.65101e-05	2.38151e-05	2.25986e-05	2.24053e-05	2.07623e-05	1.92221e-05	1.68872e-05	1.52485e-05	1.70687e-05	1.73475e-05	1.75725e-05	1.67585e-05		Congo, Democratic Republic	0.000150093	0.000141108	0.000138833	0.000124424
Congo, Republic	102	95	82	84	74	72	50	50	25	20	25	35	25	15	10	4.157	2.09738	0.690864	0.00075		0.251		0.0003	0.25205	0.25205	0.942914		Congo, Republic	1.4411e-05	1.32712e-05	1.0968e-05	1.07551e-05	9.16882e-06	9.06e-06	6.70915e-06	6.50634e-06	3.23772e-06	2.60063e-06	3.21052e-06	4.35136e-06	2.9969e-06	1.86939e-06	1.25456e-06		Congo, Republic	5.39113e-05	4.96474e-05	4.1031e-05	4.02347e-05
Korea, Democratic People's Republic	99	94	85	101	93	107	85	65	35	25	15	15	10	10	10	1.78	0.898083	0	0.00075				0.0003	0.00105	0.00105	0.00105		Korea, Democratic People's Republic	5.82682e-08	5.47039e-08	4.73624e-08	5.38717e-08	4.80029e-08	5.60895e-08	4.75137e-08	3.52357e-08	1.88829e-08	1.35423e-08	8.02471e-09	7.76874e-09	4.99384e-09	5.19172e-09	5.2263e-09		Korea, Democratic People's Republic	5.82682e-08	5.47039e-08	4.73624e-08	5.38717e-08
Korea, Republic	1185	1226	1282	1367	1423	1533	1595	1755	1875	1930	1680	1730	1830	1905	1960	0.721	0.363774	0	0.00075				0.0003	0.00105	0.00105	0.00105		Korea, Republic	6.97453e-07	7.13478e-07	7.14337e-07	7.29134e-07	7.34495e-07	8.03601e-07	8.91582e-07	9.51364e-07	1.01159e-06	1.04546e-06	8.98768e-07	8.95995e-07	9.13872e-07	9.89022e-07	1.02435e-06		Korea, Republic	6.97453e-07	7.13478e-07	7.14337e-07	7.29134e-07
Kosovo	8287	11319	13369	14924	15703	17459	17390	17825	18570	19765	20915	23220	24515	26055	27260	1.545	0.779516											Kosovo																	Kosovo
Croatia	18694	18709	18695	19618	20990	23631	26140	28170	30320	31550	31950	31955	31350	30665	29500	1.46	0.73663	0.0198911	0.005				0.0003	0.0053	0.0053	0.0251911		Croatia	5.55374e-05	5.49575e-05	5.25808e-05	5.28178e-05	5.46869e-05	6.25269e-05	7.37552e-05	7.70802e-05	8.2569e-05	8.62656e-05	8.62771e-05	8.35382e-05	7.90239e-05	8.03601e-05	7.78221e-05		Croatia	0.000263971	0.000261215	0.000249918	0.000251045
Cuba	644	663	659	623	607	599	595	550	535	500	475	460	460	480	450	1.439	0.726034	0.251775	0.005	0.017	0.083		0.0003	0.1053	0.1053	0.357075		Cuba	3.80121e-05	3.86939e-05	3.68247e-05	3.33247e-05	3.14204e-05	3.14894e-05	3.33547e-05	2.99e-05	2.89464e-05	2.71619e-05	2.54842e-05	2.38922e-05	2.30373e-05	2.49914e-05	2.35855e-05		Cuba	0.0001289	0.000131212	0.000124874	0.000113005
Kuwait	10	11	21	32	58	77	70	15	15	5	0	0	0	0	15	1.524	0.76892	0.23198	0.00075		0.04		0.0003	0.04105	0.04105	0.27303		Kuwait	2.30102e-07	2.50269e-07	4.57465e-07	6.67287e-07	1.1704e-06	1.57802e-06	1.52976e-06	3.17896e-07	3.16385e-07	1.05888e-07	0	0	0	0	3.06485e-07		Kuwait	1.53044e-06	1.66457e-06	3.04267e-06	4.43823e-06
Laos, People's Democratic Republic	101	109	104	101	104	105	100	95	95	95	100	90	90	90	85	2.421	1.22149	0.407512	0.0204	0	0	0.272	0.0003	0.2927	0.301158	0.700212		Laos, People's Democratic Republic	1.70499e-05	1.81937e-05	1.66209e-05	1.54513e-05	1.53965e-05	1.57867e-05	1.60326e-05	1.47706e-05	1.47004e-05	1.47598e-05	1.53442e-05	1.33692e-05	1.28909e-05	1.34016e-05	1.27414e-05		Laos, People's Democratic Republic	3.96422e-05	4.23016e-05	3.86446e-05	3.59253e-05
Lesotho	3	2	2	2	1	1	0	0	0	0	0	0	0	0	0	2.694	1.35923	0.12448	0.00075				0.0003	0.00105	0.00105	0.12553		Lesotho	1.7657e-09	1.16391e-09	1.11441e-09	1.06677e-09	5.1616e-10	5.24201e-10	0	0	0	0	0	0	0	0	0		Lesotho	2.11095e-07	1.39149e-07	1.33231e-07	1.27535e-07
Latvia	699	852	987	1170	1260	1323	1380	1455	1490	1530	1510	1490	1450	1450	1415	1.36	0.686176	0	0.001				0.0003	0.0013	0.0013	0.0013		Latvia	5.09363e-07	6.1388e-07	6.80905e-07	7.72643e-07	8.05209e-07	8.58642e-07	9.55066e-07	9.76532e-07	9.95272e-07	1.02612e-06	1.00016e-06	9.55432e-07	8.96513e-07	9.32036e-07	9.15598e-07		Latvia	5.09363e-07	6.1388e-07	6.80905e-07	7.72643e-07
Lebanon	1047	1035	1015	1018	986	935	950	920	920	900	865	890	925	955	925	2.239	1.12967	0.0296036	0.03		0.01		0.0003	0.0403	0.0403	0.0699036		Lebanon	2.36515e-05	2.31178e-05	2.17069e-05	2.08402e-05	1.95334e-05	1.88116e-05	2.03817e-05	1.91414e-05	1.90504e-05	1.87116e-05	1.77611e-05	1.76915e-05	1.77293e-05	1.90296e-05	1.85546e-05		Lebanon	4.10255e-05	4.00997e-05	3.76523e-05	3.61491e-05
Liberia	32	28	24	20	17	14	0	0	0	0	0	0	0	5	0	3.95	1.99294	0.406628	0.077	0.009	0.055		0.0003	0.1413	0.1413	0.547928		Liberia	2.53454e-06	2.19281e-06	1.79961e-06	1.43556e-06	1.18083e-06	9.87595e-07	0	0	0	0	0	0	0	3.49328e-07	0		Liberia	9.82836e-06	8.50321e-06	6.97848e-06	5.56677e-06
Libya	108	92	113	118	103	95	80	90	90	80	80	85	105	120	110	2.355	1.18819	0.345434	0.003	0.002	0.02		0.0003	0.0253	0.0253	0.370734		Libya	1.53162e-06	1.29006e-06	1.51714e-06	1.51653e-06	1.28101e-06	1.19992e-06	1.07751e-06	1.17556e-06	1.16997e-06	1.04417e-06	1.03124e-06	1.06074e-06	1.26344e-06	1.50115e-06	1.38522e-06		Libya	2.24436e-05	1.89039e-05	2.22314e-05	2.22225e-05
Liechtenstein	23	20	21	19	16	19	0	0	0	0	0	0	0	0	0	1.45	0.731584	0	0.001				0.0003	0.0013	0.0013	0.0013		Liechtenstein	1.67602e-08	1.44103e-08	1.44873e-08	1.25472e-08	1.02249e-08	1.23312e-08	0	0	0	0	0	0	0	0	0		Liechtenstein	1.67602e-08	1.44103e-08	1.44873e-08	1.25472e-08
Lithuania	1975	2147	2397	2556	2676	2818	2870	2920	3055	3060	3015	2950	2880	2845	2725	1.18	0.595358	0	0.001				0.0003	0.0013	0.0013	0.0013		Lithuania	1.43919e-06	1.54695e-06	1.65363e-06	1.68793e-06	1.71011e-06	1.82891e-06	1.98626e-06	1.95978e-06	2.04064e-06	2.05224e-06	1.99701e-06	1.89163e-06	1.78066e-06	1.82872e-06	1.76325e-06		Lithuania	1.43919e-06	1.54695e-06	1.65363e-06	1.68793e-06
Luxembourg	426	431	448	428	454	492	520	540	545	555	550	520	525	505	560	1.25	0.630676	0.0163591	0.00471612	0.000117695	0.00144637	1.38947e-05	0.0003	0.00659408	0.00676816	0.0229532		Luxembourg	1.61617e-06	1.61677e-06	1.60907e-06	1.47151e-06	1.5105e-06	1.66243e-06	1.87363e-06	1.88688e-06	1.8953e-06	1.93788e-06	1.89663e-06	1.73598e-06	1.68995e-06	1.68999e-06	1.88653e-06		Luxembourg	5.48101e-06	5.48304e-06	5.45692e-06	4.99042e-06
Macau	0	0	0	0	0	1	0	0	0	0	0	0	0	0	0	0.586	0.295661	0.201389	0.03				0.0003	0.0303	0.07727	0.231689		Macau	0	0	0	0	0	3.85762e-08	0	0	0	0	0	0	0	0	0		Macau	0	0	0	0
Madagascar	83	96	114	144	184	253	325	455	605	745	820	960	1150	1355	1760	3.972	2.00404	0.359148	0.0015		0.11695		0.0003	0.11875	0.11875	0.477898		Madagascar	5.52485e-06	6.3184e-06	7.18399e-06	8.68655e-06	1.07411e-05	1.49991e-05	2.05461e-05	2.7895e-05	3.6915e-05	4.56409e-05	4.96133e-05	5.62311e-05	6.49498e-05	7.95602e-05	0.000104029		Madagascar	2.22342e-05	2.54277e-05	2.89112e-05	3.49581e-05
Malawi	6	4	5	11	13	13	0	0	0	5	5	5	5	5	5	3.648	1.84057	0.381308	0.0015	0	0.049	0	0.0003	0.0508	0.0508	0.432108		Malawi	1.70853e-07	1.12622e-07	1.34791e-07	2.83861e-07	3.2464e-07	3.29698e-07	0	0	0	1.31038e-07	1.29414e-07	1.25286e-07	1.20803e-07	1.2559e-07	1.26427e-07		Malawi	1.45329e-06	9.57973e-07	1.14654e-06	2.41454e-06
Malaysia	283	271	274	293	287	317	325	335	350	320	325	320	330	350	385	1.55	0.782038	0.264308	0.0165802	0	0	0.0550568	0.0003	0.071937	0.0877329	0.336245		Malaysia	1.39173e-05	1.31775e-05	1.27567e-05	1.30581e-05	1.23777e-05	1.38845e-05	1.51795e-05	1.51736e-05	1.57777e-05	1.44835e-05	1.45276e-05	1.38479e-05	1.37696e-05	1.51828e-05	1.68123e-05		Malaysia	5.33395e-05	5.05039e-05	4.88913e-05	5.00464e-05
Maldives	1	1	1	4	4	5	0	0	0	0	0	0	0	0	0	1.575	0.794652	0.496	0.1734		0.0014	0.0097	0.003	0.1875	0.1875	0.6835		Maldives	1.05101e-07	1.03921e-07	9.95009e-08	3.80988e-07	3.68686e-07	4.68037e-07	0	0	0	0	0	0	0	0	0		Maldives	3.8313e-07	3.78826e-07	3.62714e-07	1.38883e-06
Mali	21	19	17	16	16	17	0	5	5	15	10	10	15	15	25	5.614	2.83249	0.357751	0.00288849	0.0856586	0.147578		0.0003	0.236426	0.236426	0.594176		Mali	2.78305e-06	2.48971e-06	2.13289e-06	1.9216e-06	1.85956e-06	2.00656e-06	0	6.10302e-07	6.07402e-07	1.82957e-06	1.2046e-06	1.16618e-06	1.68667e-06	1.75351e-06	2.94198e-06		Mali	6.99426e-06	6.25705e-06	5.36031e-06	4.82931e-06
Malta	21	22	21	27	28	28	10	20	10	10	10	5	10	10	5	1.06	0.534813	0	0.03				0.0003	0.0303	0.0303	0.0303		Malta	3.56672e-07	3.69459e-07	3.37666e-07	4.15581e-07	4.17057e-07	4.23555e-07	1.61307e-07	3.12862e-07	1.55688e-07	1.56317e-07	1.5438e-07	7.47279e-08	1.44108e-07	1.49818e-07	7.5408e-08		Malta	3.56672e-07	3.69459e-07	3.37666e-07	4.15581e-07
Morocco	1003	1029	1082	1148	1236	1293	1355	1415	1525	1645	1725	1905	2210	2465	2790	2.23	1.12513	0.345434	0.03	0.01	0.015		0.0003	0.0553	0.0553	0.400734		Morocco	3.10909e-05	3.15385e-05	3.17525e-05	3.2249e-05	3.35999e-05	3.56971e-05	3.98911e-05	4.03982e-05	4.33318e-05	4.69303e-05	4.8603e-05	5.19625e-05	5.8125e-05	6.74006e-05	7.67953e-05		Morocco	0.000225301	0.000228545	0.000230096	0.000233694
Marshall Islands	0	0	0	0	1	1	0	0	0	0	0	0	0	0	0	2.919	1.47275	0.0199	0.00075				0.0003	0.00105	0.00105	0.02095		Marshall Islands	0	0	0	0	5.1616e-10	5.24201e-10	0	0	0	0	0	0	0	0	0		Marshall Islands	0	0	0	0
Mauritania	4	5	7	8	10	12	5	0	0	0	5	0	0	0	0	4.697	2.36983	0.356592	0.00075	0.012	0.058		0.0003	0.07105	0.07105	0.427642		Mauritania	1.59306e-07	1.96895e-07	2.63929e-07	2.88738e-07	3.49268e-07	4.25652e-07	1.89123e-07	0	0	0	1.81002e-07	0	0	0	0		Mauritania	9.58843e-07	1.18509e-06	1.58856e-06	1.73788e-06
Mauritius	78	76	80	75	70	67	60	65	45	45	45	30	25	45	30	1.39	0.701312	0.238313	0.0358908	0	0.0124892	0.00608871	0.0003	0.0547687	0.0587758	0.293081		Mauritius	2.56981e-06	2.47578e-06	2.49525e-06	2.23928e-06	2.02251e-06	1.96599e-06	1.87742e-06	1.97239e-06	1.35901e-06	1.3645e-06	1.3476e-06	8.69741e-07	6.98849e-07	1.30777e-06	8.77657e-07		Mauritius	1.28141e-05	1.23453e-05	1.24424e-05	1.1166e-05
Mexico	803	857	935	989	1040	1097	1135	1245	1300	1400	1340	1410	1570	1680	1760	1.91	0.963673	0	0.00175	0.000505	0.00277		0.0003	0.005325	0.005325	0.005325		Mexico	2.39686e-06	2.52931e-06	2.64215e-06	2.67526e-06	2.72237e-06	2.91632e-06	3.21756e-06	3.4227e-06	3.55693e-06	3.84601e-06	3.63558e-06	3.70347e-06	3.97617e-06	4.42334e-06	4.66485e-06		Mexico	2.39686e-06	2.52931e-06	2.64215e-06	2.67526e-06
Micronesia, Federated States of	0	0	0	0	0	0	0	0	0	0	0	0	0	0	0	2.748	1.38648	0.0199	0.00075				0.0003	0.00105	0.00105	0.02095		Micronesia, Federated States of	0	0	0	0	0	0	0	0	0	0	0	0	0	0	0		Micronesia, Federated States of	0	0	0	0
Moldova, Republic of	569	577	575	588	619	685	800	870	975	1145	1310	1450	1705	1780	1770	1.731	0.87336	0	0.001				0.0003	0.0013	0.0013	0.0013		Moldova, Republic of	4.14632e-07	4.15738e-07	3.96677e-07	3.88303e-07	3.95575e-07	4.44573e-07	5.53662e-07	5.83906e-07	6.51269e-07	7.67912e-07	8.67688e-07	9.29783e-07	1.05418e-06	1.14416e-06	1.14531e-06		Moldova, Republic of	4.14632e-07	4.15738e-07	3.96677e-07	3.88303e-07
Monaco	0	1	2	2	1	1	0	0	0	0	0	0	0	0	0	2.11	1.06458	0	0.001				0.0003	0.0013	0.0013	0.0013		Monaco	0	7.20517e-10	1.37975e-09	1.32076e-09	6.39055e-10	6.49011e-10	0	0	0	0	0	0	0	0	0		Monaco	0	7.20517e-10	1.37975e-09	1.32076e-09
Mongolia	337	350	353	349	351	363	365	400	435	490	470	480	540	550	590	2.7	1.36226	0	0.00075				0.0003	0.00105	0.00105	0.00105		Mongolia	1.98347e-07	2.03685e-07	1.96693e-07	1.86151e-07	1.81172e-07	1.90285e-07	2.0403e-07	2.16835e-07	2.34688e-07	2.65429e-07	2.51441e-07	2.486e-07	2.69667e-07	2.85544e-07	3.08352e-07		Mongolia	1.98347e-07	2.03685e-07	1.96693e-07	1.86151e-07
Montenegro (from June 3, 2006)	644	767	820	846	858	865	885	895	910	920	965	975	990	1000	965	1.74	0.877901	0.0198911	0.0025				0.0003	0.0028	0.0028	0.0226911		Montenegro (from June 3, 2006)	1.01077e-06	1.19029e-06	1.21842e-06	1.20331e-06	1.18097e-06	1.20916e-06	1.31921e-06	1.29378e-06	1.30922e-06	1.32895e-06	1.37668e-06	1.34658e-06	1.31837e-06	1.38446e-06	1.3449e-06		Montenegro (from June 3, 2006)	8.19122e-06	9.64609e-06	9.87404e-06	9.75159e-06
Mozambique	38	36	38	38	39	40	20	25	30	25	20	15	25	35	30	4.763	2.40313	0.359659	0.026		0.028		0.0003	0.0543	0.0543	0.413959		Mozambique	1.15662e-06	1.08344e-06	1.09499e-06	1.04817e-06	1.04102e-06	1.08435e-06	5.7815e-07	7.00842e-07	8.37015e-07	7.00329e-07	5.53323e-07	4.01755e-07	6.45632e-07	9.397e-07	8.10823e-07		Mozambique	8.81756e-06	8.25963e-06	8.3477e-06	7.99081e-06
Myanmar	28	33	29	27	29	28	5	15	20	20	30	35	35	75	90	2.115	1.0671	0.368154	0.0224217	0	0	0.24896	0.0003	0.271681	0.273608	0.639835		Myanmar	4.29432e-06	5.0043e-06	4.21068e-06	3.75269e-06	3.90051e-06	3.82469e-06	7.283e-07	2.11885e-06	2.81171e-06	2.82307e-06	4.18215e-06	4.72354e-06	4.55452e-06	1.01464e-05	1.22568e-05		Myanmar	1.00423e-05	1.17026e-05	9.84673e-06	8.7757e-06
Namibia	38	41	48	44	47	53	50	50	65	65	65	70	80	120	155	3.212	1.62059	0.125451	0.00075		0.02		0.0003	0.02105	0.02105	0.146501		Namibia	4.48377e-07	4.7834e-07	5.3619e-07	4.70494e-07	4.86345e-07	5.56976e-07	5.60316e-07	5.43378e-07	7.03036e-07	7.05875e-07	6.97131e-07	7.26809e-07	8.00917e-07	1.24898e-06	1.62401e-06		Namibia	3.12056e-06	3.3291e-06	3.73172e-06	3.27449e-06
Nauru	0	0	0	0	0	0	0	0	0	0	0	0	0	0	0	3.331	1.68063	0.0199	0.00075				0.0003	0.00105	0.00105	0.02095		Nauru	0	0	0	0	0	0	0	0	0	0	0	0	0	0	0		Nauru	0	0	0	0
Nepal	94	113	134	171	225	287	385	485	525	600	610	635	715	780	865	1.984	1.00101	0.95976	0.01			0.03	0.0003	0.0403	0.0403	1.00006		Nepal	2.12344e-06	2.52397e-06	2.86573e-06	3.50067e-06	4.45741e-06	5.77425e-06	8.25994e-06	1.00908e-05	1.08712e-05	1.24744e-05	1.25252e-05	1.26226e-05	1.37043e-05	1.55425e-05	1.73511e-05		Nepal	5.2694e-05	6.26333e-05	7.11142e-05	8.68704e-05
New Zealand	105	115	105	105	103	109	95	130	130	105	105	90	90	100	100	1.56	0.787084	0.0295468	0.00293314	6.0606e-05	0.000801643	0.00226583	0.0003	0.00636123	0.00840607	0.035908		New Zealand	4.94755e-07	5.35787e-07	4.68391e-07	4.48366e-07	4.25623e-07	4.57434e-07	4.25136e-07	5.64179e-07	5.61499e-07	4.5535e-07	4.49709e-07	3.73169e-07	3.59816e-07	4.15638e-07	4.18406e-07		New Zealand	2.11343e-06	2.28871e-06	2.00081e-06	1.91527e-06
Nicaragua	39	40	44	38	41	40	25	25	25	15	20	30	50	40	50	2.218	1.11907	0.0215783	0.0012	0.0024	0.0096		0.0003	0.0135	0.0135	0.0350783		Nicaragua	2.95125e-07	2.99292e-07	3.15219e-07	2.60596e-07	2.7209e-07	2.69589e-07	1.79674e-07	1.74242e-07	1.73415e-07	1.04469e-07	1.37566e-07	1.99768e-07	3.21032e-07	2.67002e-07	3.35976e-07		Nicaragua	7.6685e-07	7.77678e-07	8.19063e-07	6.7713e-07
Netherlands	1582	1560	1527	1624	1636	1653	1665	1640	1565	1560	1535	1530	1500	1500	1490	1.43	0.721493	0.0487157	0.0041392	0.000931847	0.00462822	0.00071827	0.0003	0.0107175	0.0107865	0.0594332		Netherlands	9.56524e-06	9.32626e-06	8.74071e-06	8.89852e-06	8.67482e-06	8.90151e-06	9.56109e-06	9.13285e-06	8.67378e-06	8.68099e-06	8.43605e-06	8.14036e-06	7.69518e-06	8.00009e-06	7.9997e-06		Netherlands	5.27039e-05	5.13872e-05	4.81609e-05	4.90304e-05
Niger	7	9	9	8	7	9	0	0	0	0	0	0	0	0	0	6.061	3.05802	0.403328	0.022	0.06	0.201		0.0003	0.2833	0.2833	0.686628		Niger	1.11161e-06	1.41316e-06	1.35305e-06	1.15129e-06	9.74854e-07	1.27291e-06	0	0	0	0	0	0	0	0	0		Niger	2.69418e-06	3.42503e-06	3.27936e-06	2.79037e-06
Nigeria	672	730	776	917	1093	1434	2055	2555	3120	3535	3510	3515	3515	3415	3445	4.482	2.26135	0.501203	0.005	0.045	0.244		0.0003	0.2943	0.2943	0.795503		Nigeria	0.000110858	0.000119073	0.000121193	0.000137091	0.000158127	0.000210692	0.000321968	0.000388205	0.000471799	0.000536713	0.000526316	0.000510253	0.000491995	0.000496938	0.000504643		Nigeria	0.000299653	0.000321859	0.000327589	0.000370562
North Macedonia	3082	3185	3459	3923	4299	5052	4935	5205	5605	6245	6695	7490	8425	9165	9205	1.5	0.756811	0.120104	0.02				0.0003	0.0203	0.0203	0.140404		North Macedonia	3.507e-05	3.58349e-05	3.72625e-05	4.04542e-05	4.29001e-05	5.11998e-05	5.33328e-05	5.45503e-05	5.84634e-05	6.5402e-05	6.92461e-05	7.49977e-05	8.13413e-05	9.1992e-05	9.3009e-05		North Macedonia	0.00024256	0.00024785	0.000257724	0.000279799
Norway	251	249	256	247	256	256	270	260	250	290	285	275	300	305	315	1.4	0.706357		0.00214691	8.30108e-05	0.000800059	0.000814528	0.0003	0.00414451	0.00439937	0.00414451		Norway	6.18973e-07	6.07143e-07	5.97663e-07	5.51998e-07	5.53638e-07	5.62263e-07	6.32362e-07	5.90533e-07	5.65123e-07	6.5819e-07	6.38829e-07	5.96752e-07	6.27707e-07	6.63456e-07	6.89773e-07		Norway	5.83115e-07	5.7197e-07	5.6304e-07	5.2002e-07
Oman	5	11	13	5	5	3	0	0	0	0	0	0	0	0	0	2.525	1.27397	0.887369	0.0329798	0	0.0798317	0	0.0003	0.113111	0.113111	1.00048		Oman	3.17018e-07	6.89605e-07	7.80325e-07	2.87294e-07	2.78017e-07	1.69409e-07	0	0	0	0	0	0	0	0	0		Oman	2.80405e-06	6.09961e-06	6.90204e-06	2.54114e-06
Austria	5740	5695	5665	5663	5522	5486	5445	5305	5255	5060	4900	4840	4725	4545	4455	1.32	0.665994	0.00286129	0.00173354	4.39805e-05	0.000452966	1.18058e-05	0.0003	0.00254229	0.00260329	0.00540357		Austria	8.37611e-06	8.21708e-06	7.82616e-06	7.48892e-06	7.06666e-06	7.12997e-06	7.54626e-06	7.12999e-06	7.02923e-06	6.79573e-06	6.49932e-06	6.21496e-06	5.85019e-06	5.8503e-06	5.77266e-06		Austria	1.7386e-05	1.70559e-05	1.62445e-05	1.55445e-05
Pakistan	1231	1314	1394	1441	1536	1674	1880	1985	2085	2175	2235	2390	2585	2855	3070	3.605	1.81887	0.151539	0.0455839	0	0.0018	0.0018	0.0003	0.0494839	0.0494839	0.201023		Pakistan	3.41452e-05	3.6038e-05	3.6606e-05	3.62225e-05	3.73637e-05	4.13551e-05	4.9526e-05	5.07113e-05	5.3013e-05	5.55247e-05	5.63496e-05	5.83354e-05	6.08373e-05	6.98541e-05	7.5615e-05		Pakistan	0.000138711	0.0001464	0.000148708	0.00014715
Palestinian Territories	0	0	0	29	36	56	85	85	95	80	75	105	135	170	210	3.311	1.67053	0.0294426	0.03		0.005		0.0003	0.0353	0.0353	0.0647426		Palestinian Territories	0	0	0	5.20023e-07	6.24701e-07	9.86896e-07	1.59737e-06	1.54908e-06	1.7231e-06	1.45689e-06	1.34892e-06	1.82824e-06	2.26649e-06	2.96719e-06	3.68977e-06		Palestinian Territories	0	0	0	9.53757e-07
Palau	0	0	0	0	0	0	0	0	0	0	0	0	0	0	0	1.907	0.962159	0.0199	0.00075				0.0003	0.00105	0.00105	0.02095		Palau	0	0	0	0	0	0	0	0	0	0	0	0	0	0	0		Palau	0	0	0	0
Panama	19	22	27	28	29	34	10	10	5	5	15	15	20	20	15	2.119	1.06912	0.0502036	0.0015	0.003	0.0225		0.0003	0.0273	0.0273	0.0775036		Panama	2.90753e-07	3.32879e-07	3.91158e-07	3.88303e-07	3.89184e-07	4.63394e-07	1.45336e-07	1.40943e-07	7.01366e-08	7.04199e-08	2.08643e-07	2.01987e-07	2.5968e-07	2.69969e-07	2.03826e-07		Panama	8.25434e-07	9.45029e-07	1.11048e-06	1.10238e-06
Papua New Guinea	1	2	2	3	1	2	0	0	0	0	0	0	0	0	0	3.099	1.56357	0.9639	0.035				0.0003	0.0353	0.0353	0.9992		Papua New Guinea	1.97871e-08	3.91296e-08	3.74654e-08	5.37955e-08	1.73528e-08	3.52463e-08	0	0	0	0	0	0	0	0	0		Papua New Guinea	5.60092e-07	1.1076e-06	1.06049e-06	1.52273e-06
Paraguay	143	134	144	154	158	163	165	180	170	165	200	210	215	240	215	2.422	1.222	0.021879	0.00075				0.0003	0.00105	0.00105	0.022929		Paraguay	8.41652e-08	7.79821e-08	8.02375e-08	8.21409e-08	8.15532e-08	8.54448e-08	9.22326e-08	9.75758e-08	9.17171e-08	8.93791e-08	1.06996e-07	1.08762e-07	1.07368e-07	1.24601e-07	1.12365e-07		Paraguay	1.83793e-06	1.70291e-06	1.75216e-06	1.79372e-06
Peru	719	731	739	716	717	722	740	730	740	775	790	810	840	870	910	1.98	0.998991	0.0198733	0.00075		0.01		0.0003	0.01105	0.01105	0.0309233		Peru	4.45347e-06	4.47693e-06	4.33344e-06	4.01906e-06	3.89472e-06	3.98298e-06	4.35316e-06	4.16452e-06	4.20152e-06	4.41801e-06	4.44773e-06	4.41487e-06	4.41455e-06	4.75339e-06	5.00505e-06		Peru	1.2463e-05	1.25286e-05	1.21271e-05	1.12473e-05
Philippines	2229	2199	2159	2135	2104	2134	2190	2305	2405	2615	2725	3010	3250	3590	3940	1.916	0.9667	0.215104	0.01			0.01	0.0003	0.0203	0.039488	0.235404		Philippines	4.93381e-05	4.81273e-05	4.52422e-05	4.28265e-05	4.08419e-05	4.20696e-05	4.60384e-05	4.69912e-05	4.87969e-05	5.3272e-05	5.48252e-05	5.86276e-05	6.10371e-05	7.0094e-05	7.74402e-05		Philippines	0.000294124	0.000286906	0.000269707	0.000255306
Poland	16529	17806	19942	22049	23959	25668	26375	26550	26635	26315	25710	25005	24680	24455	23530	1.158	0.584258	0	0.001				0.0003	0.0013	0.0013	0.0013		Poland	1.20447e-05	1.28295e-05	1.37574e-05	1.45607e-05	1.53111e-05	1.66588e-05	1.82535e-05	1.78192e-05	1.77913e-05	1.76486e-05	1.70292e-05	1.60339e-05	1.52593e-05	1.57193e-05	1.52255e-05		Poland	1.20447e-05	1.28295e-05	1.37574e-05	1.45607e-05
Portugal	7496	7594	7891	8255	8378	8397	8305	8140	7940	7645	7335	7090	6945	6705	6515	1.44	0.726539	0.00872703	0.0141976	6.77491e-05	0.00782135	2.43705e-05	0.000288389	0.0223994	0.0224303	0.0311265		Portugal	9.42478e-05	9.44073e-05	9.39274e-05	9.40592e-05	9.23782e-05	9.40302e-05	9.91711e-05	9.42625e-05	9.15097e-05	8.84656e-05	8.38269e-05	7.84424e-05	7.40887e-05	7.43626e-05	7.27368e-05		Portugal	0.000130788	0.000131009	0.000130343	0.000130526
Rwanda	13	16	21	22	22	24	10	5	10	30	30	45	55	100	125	3.698	1.86579	0.4071	0.00075		0.04		0.0003	0.04105	0.04105	0.44815		Rwanda	2.99133e-07	3.64027e-07	4.57465e-07	4.5876e-07	4.43947e-07	4.91851e-07	2.18537e-07	1.05965e-07	2.10924e-07	6.35326e-07	6.27456e-07	9.11163e-07	1.07379e-06	2.02971e-06	2.55404e-06		Rwanda	3.26568e-06	3.97415e-06	4.99423e-06	5.00836e-06
Romania	12871	15093	18358	21955	28057	34351	38755	42685	46305	48675	50380	51785	52850	53750	53145	1.71	0.862765	0.097405	0.01				0.0003	0.0103	0.0103	0.107705		Romania	7.43116e-05	8.61616e-05	0.000100343	0.000114874	0.00014206	0.000176639	0.000212508	0.000226983	0.000245063	0.000258646	0.00026439	0.000263094	0.000258897	0.000273739	0.000272461		Romania	0.000777061	0.000900974	0.00104927	0.00120121
Russian Federation	11670	12065	12473	12985	13272	13701	13955	14160	14345	14525	14395	14475	14985	15195	14505	1.41	0.711403	0	0.001				0.0003	0.0013	0.0013	0.0013		Russian Federation	8.50396e-06	8.69304e-06	8.60478e-06	8.57502e-06	8.48154e-06	8.8921e-06	9.65793e-06	9.50357e-06	9.582e-06	9.74141e-06	9.53463e-06	9.2818e-06	9.265e-06	9.7671e-06	9.38569e-06		Russian Federation	8.50396e-06	8.69304e-06	8.60478e-06	8.57502e-06
Solomon Islands	0	0	0	0	0	0	0	0	0	0	0	0	0	0	0	3.557	1.79465	0.351975	0.00075				0.0003	0.00105	0.00105	0.353025		Solomon Islands	0	0	0	0	0	0	0	0	0	0	0	0	0	0	0		Solomon Islands	0	0	0	0
Zambia	27	23	20	25	31	28	5	15	15	25	20	30	35	40	40	4.101	2.06912	0.406157	0.0015	0.006	0.176		0.0003	0.1838	0.1838	0.589957		Zambia	2.78174e-06	2.34301e-06	1.95075e-06	2.33418e-06	2.80093e-06	2.56929e-06	4.89245e-07	1.42337e-06	1.41661e-06	2.37054e-06	1.87294e-06	2.7198e-06	3.05956e-06	3.63519e-06	3.65941e-06		Zambia	8.92876e-06	7.52054e-06	6.26147e-06	7.49221e-06
Samoa	4	2	2	2	2	1	0	0	0	0	0	0	0	0	0	3.829	1.93189	0.1664	0.00075				0.0003	0.00105	0.00105	0.16745		Samoa	2.35427e-09	1.16391e-09	1.11441e-09	1.06677e-09	1.03232e-09	5.24201e-10	0	0	0	0	0	0	0	0	0		Samoa	3.7545e-07	1.85616e-07	1.77722e-07	1.70124e-07
San Marino	1	0	0	0	0	0	0	0	0	0	0	0	0	0	0	1.149	0.579717	0	0.001				0.0003	0.0013	0.0013	0.0013		San Marino	7.28703e-10	0	0	0	0	0	0	0	0	0	0	0	0	0	0		San Marino	7.28703e-10	0	0	0
Sao Tome and Principe	0	0	1	0	0	0	0	0	0	0	0	0	0	0	0	3.644	1.83855	0.6864	0.00075	0.021	0.18		0.0003	0.20205	0.20205	0.88845		Sao Tome and Principe	0	0	1.07222e-07	0	0	0	0	0	0	0	0	0	0	0	0		Sao Tome and Principe	0	0	4.71475e-07	0
Saudi Arabia	49	83	125	137	213	271	160	135	145	150	115	115	105	105	100	2.28	1.15035	0.460611	0.067445	0	0.0986605	0	0.0003	0.166406	0.166406	0.627016		Saudi Arabia	4.57058e-06	7.65503e-06	1.10383e-05	1.15808e-05	1.74238e-05	2.25137e-05	1.41742e-05	1.1598e-05	1.23979e-05	1.28772e-05	9.75022e-06	9.43922e-06	8.31003e-06	8.6393e-06	8.28272e-06		Saudi Arabia	1.72219e-05	2.88441e-05	4.15925e-05	4.36364e-05
Sweden	673	692	710	725	693	696	700	680	735	710	705	715	720	755	775	1.45	0.731584		0.00282157	0.00010914	0.00119547	0.000817622	0.0003	0.00524381	0.00554404	0.00524381		Sweden	2.09145e-06	2.12634e-06	2.08886e-06	2.0418e-06	1.88866e-06	1.92639e-06	2.06602e-06	1.94632e-06	2.09375e-06	2.03071e-06	1.99143e-06	1.95525e-06	1.89847e-06	2.06964e-06	2.13862e-06		Sweden	1.97819e-06	2.01119e-06	1.97574e-06	1.93123e-06
Switzerland	2817	2763	2822	2720	2666	2643	2635	2575	2565	2530	2555	2575	2465	2420	2425	1.33	0.671039	0.0260508	0.00372122	0.000178243	0.00133222	0.000777803	0.0003	0.00630949	0.00662596	0.0323603		Switzerland	1.04627e-05	1.01468e-05	9.92274e-06	9.15519e-06	8.68368e-06	8.74289e-06	9.29481e-06	8.80859e-06	8.7327e-06	8.64832e-06	8.62559e-06	8.41582e-06	7.76803e-06	7.9284e-06	7.99771e-06		Switzerland	5.10983e-05	4.95558e-05	4.84613e-05	4.47127e-05
Senegal	80	76	76	80	78	88	70	95	120	145	175	185	215	230	260	3.818	1.92634	0.206852	0.004	0.017	0.127		0.0003	0.1483	0.1483	0.355152		Senegal	6.65026e-06	6.24677e-06	5.98109e-06	6.02672e-06	5.68631e-06	6.51527e-06	5.5265e-06	7.27353e-06	9.14396e-06	1.10936e-05	1.32229e-05	1.35327e-05	1.51644e-05	1.68652e-05	1.9192e-05		Senegal	1.59262e-05	1.49599e-05	1.43237e-05	1.44329e-05
Serbia	5928	8681	9661	9406	9989	10520	10095	10385	10770	11015	11285	11725	12060	12410	12470	1.61	0.812311	0.0198911	0.0025				0.0003	0.0028	0.0028	0.0226911		Serbia	9.30408e-06	1.34719e-05	1.43551e-05	1.33787e-05	1.37491e-05	1.47056e-05	1.50479e-05	1.50122e-05	1.54948e-05	1.59113e-05	1.60994e-05	1.61935e-05	1.60602e-05	1.71811e-05	1.73792e-05		Serbia	7.53999e-05	0.000109176	0.000116333	0.00010842
Serbia (including Kosovo) (June 3, 2006-February 16, 2008)	4174	2250	1077	889	738	678	650	555	465	430	410	370	350	315	270	1.61	0.812311	0.0198911	0.0025				0.0003	0.0028	0.0028	0.0226911		Serbia (including Kosovo) (June 3, 2006-February 16, 2008)	6.55115e-06	3.49174e-06	1.60029e-06	1.26447e-06	1.0158e-06	9.47756e-07	9.68908e-07	8.0229e-07	6.68995e-07	6.21139e-07	5.84912e-07	5.11011e-07	4.66092e-07	4.36104e-07	3.76294e-07		Serbia (including Kosovo) (June 3, 2006-February 16, 2008)	5.30903e-05	2.82969e-05	1.29687e-05	1.02472e-05
Serbia and Montenegro (February 5, 2003-June 2, 2006)	6379	3371	2109	1837	1709	1624	1485	1320	1225	1125	1045	900	810	710	590	1.61	0.812311	0.0198911	0.0025				0.0003	0.0028	0.0028	0.0226911		Serbia and Montenegro (February 5, 2003-June 2, 2006)	1.00119e-05	5.2314e-06	3.13372e-06	2.61286e-06	2.35231e-06	2.27014e-06	2.21358e-06	1.90815e-06	1.76241e-06	1.62507e-06	1.49081e-06	1.243e-06	1.07867e-06	9.82965e-07	8.22271e-07		Serbia and Montenegro (February 5, 2003-June 2, 2006)	8.11363e-05	4.2395e-05	2.53956e-05	2.11746e-05
Seychelles	10	7	7	7	7	7	0	0	0	0	0	0	0	0	0	2.02	1.01917	0.19	0.00075		0.006		0.0003	0.00705	0.00705	0.19705		Seychelles	3.95181e-08	2.73519e-08	2.61886e-08	2.5069e-08	2.42595e-08	2.46375e-08	0	0	0	0	0	0	0	0	0		Seychelles	1.10455e-06	7.64496e-07	7.31982e-07	7.00687e-07
Sierra Leone	71	72	67	64	62	63	35	40	45	40	40	40	40	50	55	3.791	1.91271	0.406157	0.00075	0.028	0.225		0.0003	0.25405	0.25405	0.660207		Sierra Leone	1.01108e-05	1.0138e-05	9.03274e-06	8.25941e-06	7.74294e-06	7.9904e-06	4.73367e-06	5.24638e-06	5.87413e-06	5.24254e-06	5.1776e-06	5.01244e-06	4.83308e-06	6.28074e-06	6.95484e-06		Sierra Leone	2.62752e-05	2.63459e-05	2.34736e-05	2.1464e-05
Zimbabwe	33	36	40	48	52	55	75	110	160	245	320	335	360	410	490	3.724	1.87891	0.351975	0.0015	0	0.014		0.0003	0.0158	0.0158	0.367775		Zimbabwe	2.92266e-07	3.15254e-07	3.35384e-07	3.85255e-07	4.03883e-07	4.33839e-07	6.30855e-07	8.97284e-07	1.29894e-06	1.99704e-06	2.57606e-06	2.61079e-06	2.70523e-06	3.20304e-06	3.85353e-06		Zimbabwe	6.80305e-06	7.33813e-06	7.80671e-06	8.96754e-06
Singapore	134	143	155	168	189	203	185	195	195	195	195	185	190	195	205	0.97	0.489405	0.160334	0.03				0.0003	0.0303	0.063179	0.190634		Singapore	4.74553e-06	5.00737e-06	5.19673e-06	5.39177e-06	5.86988e-06	6.40291e-06	6.22237e-06	6.36045e-06	6.33023e-06	6.3558e-06	6.27706e-06	5.7652e-06	5.70915e-06	6.09157e-06	6.44661e-06		Singapore	1.4319e-05	1.51091e-05	1.56804e-05	1.62689e-05
Slovakia	2218	2387	2700	3040	3274	3492	3505	3560	3590	3615	3570	3495	3515	3465	3305	1.49	0.751766	0	0.001				0.0003	0.0013	0.0013	0.0013		Slovakia	1.61626e-06	1.71987e-06	1.86266e-06	2.00755e-06	2.09227e-06	2.26635e-06	2.42573e-06	2.38932e-06	2.398e-06	2.42446e-06	2.36462e-06	2.2411e-06	2.17327e-06	2.22725e-06	2.13855e-06		Slovakia	1.61626e-06	1.71987e-06	1.86266e-06	2.00755e-06
Slovenia	1515	1509	1526	1599	1644	1709	1725	1695	1680	1610	1585	1545	1470	1410	1375	1.51	0.761857	0	0.001				0.0003	0.0013	0.0013	0.0013		Slovenia	1.10399e-06	1.08726e-06	1.05275e-06	1.05595e-06	1.05061e-06	1.10916e-06	1.19383e-06	1.13761e-06	1.12219e-06	1.07977e-06	1.04984e-06	9.907e-07	9.08879e-07	9.06325e-07	8.89715e-07		Slovenia	1.10399e-06	1.08726e-06	1.05275e-06	1.05595e-06
Somalia	112	102	95	102	170	294	525	710	775	825	835	990	1060	1180	1350	6.132	3.09384	0.0198931	0.005		0.001		0.0003	0.0063	0.0063	0.0261931		Somalia	3.95518e-07	3.56157e-07	3.17607e-07	3.2643e-07	5.26483e-07	9.24691e-07	1.7608e-06	2.30929e-06	2.50873e-06	2.68137e-06	2.68025e-06	3.07642e-06	3.17608e-06	3.67573e-06	4.2333e-06		Somalia	1.64442e-06	1.48077e-06	1.32049e-06	1.35718e-06
Soviet Union (until 25.12.1991)	168	141	118	105	91	82	50	55	50	35	35	35	25	20	10	n.a.												Soviet Union (until 25.12.1991)																	Soviet Union (until 25.12.1991)
Spain	5704	5995	6709	7336	7720	7889	7915	7705	7660	7445	7340	7350	7315	7275	7280	1.12	0.565086	0.00723017	0.00262202	0.000374818	0.00108027	2.03522e-05	0.000290737	0.0043882	0.00445605	0.0116184		Spain	1.42474e-05	1.48061e-05	1.58647e-05	1.66058e-05	1.69107e-05	1.75501e-05	1.87764e-05	1.77257e-05	1.75384e-05	1.7115e-05	1.66646e-05	1.6155e-05	1.55028e-05	1.60289e-05	1.61468e-05		Spain	3.71477e-05	3.86042e-05	4.13646e-05	4.32966e-05
Sri Lanka	1487	1435	1433	1414	1423	1428	1430	1470	1440	1445	1425	1425	1425	1465	1490	1.974	0.995964	0.494006	0.025			0.025	0.0003	0.0503	0.0503	0.544306		Sri Lanka	4.19263e-05	4.00056e-05	3.82507e-05	3.61299e-05	3.51858e-05	3.58596e-05	3.82926e-05	3.81738e-05	3.72171e-05	3.74972e-05	3.65201e-05	3.53552e-05	3.40901e-05	3.64357e-05	3.73043e-05		Sri Lanka	0.000453692	0.000432908	0.000413918	0.000390969
St. Kitts and Nevis	0	0	0	1	1	1	0	0	0	0	0	0	0	0	0	1.505	0.759334	0.23315	0.01	0.04	0.11		0.0003	0.1603	0.1603	0.39345		St. Kitts and Nevis	0	0	0	8.14298e-08	7.88004e-08	8.00281e-08	0	0	0	0	0	0	0	0	0		St. Kitts and Nevis	0	0	0	1.99866e-07
St. Lucia	6	5	5	7	7	7	0	0	0	0	0	0	0	0	0	1.379	0.695762	0.213231	0.01	0.03	0.1		0.0003	0.1403	0.1403	0.353531		St. Lucia	4.71863e-07	3.88802e-07	3.72266e-07	4.98891e-07	4.82781e-07	4.90303e-07	0	0	0	0	0	0	0	0	0		St. Lucia	1.18901e-06	9.79712e-07	9.38044e-07	1.25712e-06
St. Vincent and the Grenadines	3	3	3	3	3	2	0	0	0	0	0	0	0	0	0	1.775	0.89556	0.147776	0.03	0.03	0.068		0.0003	0.1283	0.1283	0.276076		St. Vincent and the Grenadines	2.15752e-07	2.13328e-07	2.04255e-07	1.95523e-07	1.89209e-07	1.28105e-07	0	0	0	0	0	0	0	0	0		St. Vincent and the Grenadines	4.64255e-07	4.5904e-07	4.39516e-07	4.20726e-07
Stateless	211	223	220	198	193	294	420	425	480	500	495	540	600	630	640	n.a.												Stateless																	Stateless
South Africa	328	313	319	330	323	345	360	375	425	435	440	445	480	505	520	2.216	1.11806	0.125484	0.0015	0.001	0.003		0.0003	0.0058	0.0058	0.131284		South Africa	1.06637e-06	1.00617e-06	9.81848e-07	9.72281e-07	9.20927e-07	9.98978e-07	1.11158e-06	1.1229e-06	1.26657e-06	1.30161e-06	1.30026e-06	1.27309e-06	1.32408e-06	1.44824e-06	1.50119e-06		South Africa	2.41375e-05	2.27749e-05	2.22243e-05	2.20077e-05
Sudan (including South Sudan) (until July 8, 2011)	81	81	69	56	45	37	10	10	10	5	5	5	5	5	0	4.323	2.18113	0.344047	0.039	0.001	0.021		0.0003	0.0613	0.0613	0.405347		Sudan (including South Sudan) (until July 8, 2011)	2.78325e-06	2.75199e-06	2.24458e-06	1.74381e-06	1.35603e-06	1.13232e-06	3.26341e-07	3.16476e-07	3.14972e-07	1.58122e-07	1.56163e-07	1.51182e-07	1.45773e-07	1.51549e-07	0		Sudan (including South Sudan) (until July 8, 2011)	1.84043e-05	1.81976e-05	1.48423e-05	1.15309e-05
Sudan (excluding South Sudan) (from July 9, 2011)	0	2	13	21	36	45	25	35	60	80	90	105	120	135	175	4.323	2.18113	0.344047	0.039	0.001	0.021		0.0003	0.0613	0.0613	0.405347		Sudan (excluding South Sudan) (from July 9, 2011)	0	6.79503e-08	4.22892e-07	6.53927e-07	1.08482e-06	1.37715e-06	8.15852e-07	1.10767e-06	1.88983e-06	2.52996e-06	2.81094e-06	3.17483e-06	3.49854e-06	4.09181e-06	5.33954e-06		Sudan (excluding South Sudan) (from July 9, 2011)	0	4.49322e-07	2.79638e-06	4.32411e-06
South Sudan (from July 9, 2011)	0	0	0	3	5	4	0	0	0	0	0	0	5	15	25	3.864	1.94955	0.344047	0.039	0.001	0.021		0.0003	0.0613	0.0613	0.405347		South Sudan (from July 9, 2011)	0	0	0	9.34182e-08	1.50669e-07	1.22414e-07	0	0	0	0	0	0	1.45773e-07	4.54646e-07	7.62791e-07		South Sudan (from July 9, 2011)	0	0	0	6.17729e-07
Suriname	0	1	2	2	1	0	0	0	0	0	0	0	0	0	0	2.249	1.13471	0.151776	0.01	0.015	0.07		0.0003	0.0953	0.0953	0.247076		Suriname	0	5.28194e-08	1.01146e-07	9.68217e-08	4.68476e-08	0	0	0	0	0	0	0	0	0	0		Suriname	0	1.3694e-07	2.62232e-07	2.51021e-07
Syria	777	805	961	1245	2371	7157	13585	15370	16870	17820	18345	19720	20970	21795	22270	2.712	1.36831	0.0294426	0.05		0.01		0.0003	0.0603	0.0603	0.0897426		Syria	2.62631e-05	2.69038e-05	3.07515e-05	3.81361e-05	7.02819e-05	0.000215455	0.000436102	0.000478488	0.00052269	0.000554354	0.000563617	0.000586536	0.000601397	0.000649824	0.000668409		Syria	3.90865e-05	4.00401e-05	4.57665e-05	5.67567e-05
Tajikistan	41	43	39	38	43	47	50	75	95	115	120	155	240	265	310	3.072	1.54995	0.133277	0.05				0.0003	0.0503	0.0503	0.183577		Tajikistan	1.156e-06	1.19877e-06	1.04102e-06	9.7096e-07	1.06324e-06	1.18025e-06	1.3389e-06	1.94764e-06	2.4553e-06	2.9842e-06	3.07538e-06	3.84565e-06	5.74149e-06	6.59076e-06	7.7613e-06		Tajikistan	4.219e-06	4.3751e-06	3.79935e-06	3.54366e-06
Taiwan	417	443	511	559	610	654	685	690	770	790	715	760	810	890	885	0.999	0.504036	0.092191	0.02				0.0003	0.0203	0.058676	0.112491		Taiwan	1.37153e-05	1.44067e-05	1.59114e-05	1.66618e-05	1.75948e-05	1.91579e-05	2.13975e-05	2.09021e-05	2.32147e-05	2.39139e-05	2.13755e-05	2.1996e-05	2.26043e-05	2.58209e-05	2.58469e-05		Taiwan	2.62943e-05	2.76199e-05	3.05045e-05	3.19433e-05
Tanzania	54	52	57	61	55	56	35	60	65	80	80	85	105	125	145	4.606	2.32392	0.382019	0.0015	0	0.23		0.0003	0.2318	0.2318	0.613819		Tanzania	7.0164e-06	6.68063e-06	7.01155e-06	7.18279e-06	6.26716e-06	6.48053e-06	4.31909e-06	7.18034e-06	7.74175e-06	9.56678e-06	9.44827e-06	9.71858e-06	1.15757e-05	1.43267e-05	1.67296e-05		Tanzania	1.85798e-05	1.76907e-05	1.8567e-05	1.90204e-05
Thailand	6757	6776	6856	6765	6675	6513	6290	6095	5920	5700	5440	5280	5045	4830	4585	1.212	0.611504	0.655449	0.0495517	0	0	0.208501	0.0003	0.258352	0.283891	0.913802		Thailand	0.00107526	0.00106617	0.00103288	0.000975594	0.000931532	0.000923085	0.000950634	0.000893317	0.000863546	0.000834813	0.000786864	0.00073936	0.000681174	0.000677985	0.000647882		Thailand	0.00346109	0.00343183	0.00332467	0.00314029
Timor-Leste	0	0	0	0	0	0	0	0	0	0	0	0	0	0	0	2.707	1.36579	0.242026	0.03			0.04	0.0003	0.0703	0.0703	0.312326		Timor-Leste	0	0	0	0	0	0	0	0	0	0	0	0	0	0	0		Timor-Leste	0	0	0	0
Togo	384	387	383	395	420	439	500	545	605	650	685	725	785	900	970	4.192	2.11504	0.4071	0.005	0.094	0.186		0.0003	0.2853	0.2853	0.6924		Togo	6.14102e-05	6.11947e-05	5.79864e-05	5.72464e-05	5.89042e-05	6.25281e-05	7.59421e-05	8.02747e-05	8.86889e-05	9.56704e-05	9.95729e-05	0.000102026	0.000106516	0.00012696	0.000137746		Togo	0.000149037	0.000148514	0.000140728	0.000138932
Tonga	6	5	5	5	3	4	0	0	0	0	0	0	0	0	0	3.129	1.57871	0.1664	0.00075				0.0003	0.00105	0.00105	0.16745		Tonga	3.53141e-09	2.90978e-09	2.78603e-09	2.66691e-09	1.54848e-09	2.09681e-09	0	0	0	0	0	0	0	0	0		Tonga	5.63175e-07	4.64041e-07	4.44305e-07	4.25309e-07
Trinidad and Tobago	25	28	27	24	23	19	0	0	0	5	5	5	0	0	0	1.532	0.772957	0.172628	0.01	0.02	0.08		0.0003	0.1103	0.1103	0.282928		Trinidad and Tobago	1.54569e-06	1.71173e-06	1.58039e-06	1.34473e-06	1.24709e-06	1.04626e-06	0	0	0	2.84517e-07	2.80992e-07	2.72029e-07	0	0	0		Trinidad and Tobago	3.96481e-06	4.39071e-06	4.05383e-06	3.44934e-06
Chad	3	2	2	4	4	4	0	0	0	0	0	0	0	0	0	6.12	3.08779	0.405214	0.009	0.003	0.09		0.0003	0.1023	0.1023	0.507514		Chad	1.7203e-07	1.13398e-07	1.08575e-07	2.07867e-07	2.01155e-07	2.04289e-07	0	0	0	0	0	0	0	0	0		Chad	8.53447e-07	5.62573e-07	5.38646e-07	1.03123e-06
Czechia	2446	2582	2728	2876	2970	3008	3010	2945	2920	2885	2770	2650	2595	2520	2425	1.45	0.731584	0	0.001				0.0003	0.0013	0.0013	0.0013		Czechia	1.78241e-06	1.86037e-06	1.88197e-06	1.89925e-06	1.89799e-06	1.95223e-06	2.08315e-06	1.97656e-06	1.95047e-06	1.93487e-06	1.83473e-06	1.69926e-06	1.60445e-06	1.61982e-06	1.56913e-06		Czechia	1.78241e-06	1.86037e-06	1.88197e-06	1.89925e-06
Czechoslovakia (until December 31, 1992)	280	266	232	202	176	164	130	120	105	95	75	65	55	45	30	n.a.												Czechoslovakia (until December 31, 1992)																	Czechoslovakia (until December 31, 1992)
Tunisia	789	855	925	992	1099	1264	1405	1455	1510	1595	1660	1840	2210	2515	3015	1.832	0.924319	0.345434	0.0214199	0.00235335	0.0211801	0	0.0003	0.0452533	0.0452533	0.390687		Tunisia	2.0014e-05	2.14446e-05	2.22136e-05	2.28041e-05	2.4448e-05	2.85566e-05	3.38484e-05	3.39934e-05	3.51107e-05	3.72369e-05	3.82743e-05	4.10713e-05	4.75651e-05	5.62743e-05	6.79115e-05		Tunisia	0.000172788	0.000185138	0.000191777	0.000196875
Turkey	87357	87498	87650	87281	86576	83874	80920	78225	76130	73715	70785	68440	66885	67355	65445	1.51	0.761857	0.0296332	0.016699	1.05535e-05	0.004403	0	0.0003	0.0214126	0.0214126	0.0510457		Turkey	0.00104851	0.00103841	0.00099597	0.000949375	0.000911299	0.000896613	0.000922435	0.000864758	0.0008376	0.000814305	0.000772251	0.000722851	0.00068115	0.000713116	0.00069751		Turkey	0.00249956	0.00247547	0.00237431	0.00226323
Turkmenistan	94	106	111	109	114	118	110	105	110	120	110	100	135	135	100	2.69	1.35721	0.13495	0.012				0.0003	0.0123	0.0123	0.14725		Turkmenistan	6.48097e-07	7.22623e-07	7.24526e-07	6.81054e-07	6.89295e-07	7.24596e-07	7.20292e-07	6.66768e-07	6.952e-07	7.61463e-07	6.89361e-07	6.06702e-07	7.8974e-07	8.21033e-07	6.12224e-07		Turkmenistan	7.75874e-06	8.65093e-06	8.67371e-06	8.15328e-06
Tuvalu	0	0	0	0	0	0	0	0	0	0	0	0	0	0	0	3.208	1.61857	0.1664	0.00075				0.0003	0.00105	0.00105	0.16745		Tuvalu	0	0	0	0	0	0	0	0	0	0	0	0	0	0	0		Tuvalu	0	0	0	0
Uganda	93	89	88	92	90	91	110	100	100	140	145	175	245	345	455	4.283	2.16095	0.382204	0.00075		0.168		0.0003	0.16905	0.16905	0.551254		Uganda	8.81263e-06	8.33885e-06	7.89448e-06	7.90047e-06	7.47916e-06	7.68007e-06	9.89963e-06	8.72761e-06	8.68615e-06	1.22097e-05	1.24891e-05	1.45923e-05	1.96982e-05	2.88374e-05	3.82853e-05		Uganda	2.8737e-05	2.71921e-05	2.57431e-05	2.57626e-05
Ukraine	5968	6024	6281	6285	6561	6814	7070	7230	7370	7430	7480	7620	54400	57765	60340	0.977	0.492936	0	0.001				0.0003	0.0013	0.0013	0.0013		Ukraine	4.3489e-06	4.34039e-06	4.33309e-06	4.15048e-06	4.19284e-06	4.42236e-06	4.89298e-06	4.85246e-06	4.92292e-06	4.98304e-06	4.95443e-06	4.88617e-06	3.36347e-05	3.71304e-05	3.90439e-05		Ukraine	4.3489e-06	4.34039e-06	4.33309e-06	4.15048e-06
Hungary	4230	5140	7283	9608	11414	13417	14580	15310	15940	15915	15785	15660	15720	16015	15615	1.51	0.761857	0	0.001				0.0003	0.0013	0.0013	0.0013		Hungary	3.08241e-06	3.70346e-06	5.02434e-06	6.34492e-06	7.29417e-06	8.70778e-06	1.00905e-05	1.02754e-05	1.06474e-05	1.06736e-05	1.04553e-05	1.00417e-05	9.71944e-06	1.02942e-05	1.01039e-05		Hungary	3.08241e-06	3.70346e-06	5.02434e-06	6.34492e-06
Unclear / No information provided	612	582	575	409	460	628	950	1025	1145	1280	1295	1310	1305	1305	1290	n.a.												Unclear / No information provided																	Unclear / No information provided
Uruguay	51	50	51	47	43	43	35	30	15	15	20	15	20	20	25	1.409	0.710898	0.0198812	0.01				0.0003	0.0103	0.0103	0.0301812		Uruguay	2.94452e-07	2.85436e-07	2.78762e-07	2.45915e-07	2.17721e-07	2.21113e-07	1.91918e-07	1.59529e-07	7.93854e-08	7.9706e-08	1.04958e-07	7.62077e-08	9.79744e-08	1.01857e-07	1.28169e-07		Uruguay	8.62807e-07	8.36387e-07	8.16831e-07	7.20583e-07
Uzbekistan	484	505	507	493	470	472	490	470	465	475	450	465	510	550	580	3.5	1.76589	0.135028	0.03				0.0003	0.0303	0.0303	0.165328		Uzbekistan	8.22044e-06	8.48076e-06	8.15223e-06	7.58821e-06	7.0006e-06	7.13992e-06	7.90405e-06	7.35226e-06	7.23949e-06	7.42504e-06	6.94711e-06	6.9497e-06	7.3495e-06	8.23999e-06	8.74733e-06		Uzbekistan	4.48539e-05	4.62743e-05	4.44817e-05	4.14042e-05
Vanuatu	1	1	1	1	1	1	0	0	0	0	0	0	0	0	0	3.596	1.81433	0.351975	0.00075				0.0003	0.00105	0.00105	0.353025		Vanuatu	5.88568e-10	5.81956e-10	5.57205e-10	5.33383e-10	5.1616e-10	5.24201e-10	0	0	0	0	0	0	0	0	0		Vanuatu	1.97885e-07	1.95662e-07	1.8734e-07	1.79331e-07
Vatican City	0	0	0	0	0	0	0	0	0	0	0	0	0	0	0	n.a.												Vatican City																	Vatican City
Venezuela, Bolivarian Republic of	334	331	325	322	353	377	390	425	435	450	405	420	455	455	465	2.079	1.04894	0.106173	0.00377107	0.00400629	0.0207201	0	0.0003	0.0287975	0.0287975	0.134971		Venezuela, Bolivarian Republic of	5.39148e-06	5.28303e-06	4.96665e-06	4.71043e-06	4.99717e-06	5.42007e-06	5.97903e-06	6.31864e-06	6.43659e-06	6.68544e-06	5.94236e-06	5.96588e-06	6.23177e-06	6.4787e-06	6.66519e-06		Venezuela, Bolivarian Republic of	2.52693e-05	2.4761e-05	2.32781e-05	2.20772e-05
United Arab Emirates	10	19	23	28	28	26	10	25	5	0	0	5	5	10	30	1.2	0.605449	0.495076	0.0171		0.0189		0.0003	0.0363	0.0363	0.531376		United Arab Emirates	2.03476e-07	3.82262e-07	4.43058e-07	5.16315e-07	4.99643e-07	4.71182e-07	1.93249e-07	4.68519e-07	9.32586e-08	0	0	8.95255e-08	8.63221e-08	1.79485e-07	5.42042e-07		United Arab Emirates	2.97858e-06	5.59572e-06	6.48568e-06	7.55805e-06
United States	3974	4042	4168	4216	4289	4346	4265	4380	4450	4445	4060	4140	4240	4340	4290	1.6165	0.81559	0.0386324	0.00384663	0.00711948	0.00861795	0.00118313	0.0003	0.0210672	0.0218799	0.0596996		United States	4.87395e-05	4.90166e-05	4.83949e-05	4.68593e-05	4.61314e-05	4.74728e-05	4.96794e-05	4.94766e-05	5.00286e-05	5.01742e-05	4.52607e-05	4.46803e-05	4.41222e-05	4.69523e-05	4.67206e-05		United States	0.000132986	0.000133742	0.000132046	0.000127856
United Kingdom	2686	2658	2721	2770	2687	2690	2615	2390	2300	2000	1865	1620	1580	1565	1530	1.56	0.787084	0.0195831	0.00451323	0.0013378	0.00457919	0.000575841	0.0017718	0.0127779	0.0134903	0.032361		United Kingdom	2.03111e-05	1.98736e-05	1.94793e-05	1.89823e-05	1.7819e-05	1.81168e-05	1.87803e-05	1.66456e-05	1.59426e-05	1.39192e-05	1.28188e-05	1.07797e-05	1.01373e-05	1.04389e-05	1.02735e-05		United Kingdom	4.87231e-05	4.76736e-05	4.67279e-05	4.55356e-05
Vietnam	2705	2750	2676	2776	2891	3006	3110	3230	3330	3445	3515	3630	3950	4400	4945	1.913	0.965187	0.208254	0.0259562	0	0	0.090939	0.0003	0.117195	0.132723	0.325449		Vietnam	0.000201243	0.000202293	0.000188477	0.000187161	0.000188621	0.00019918	0.000219745	0.000221325	0.000227093	0.000235884	0.000237696	0.000237642	0.000249339	0.00028875	0.000326677		Vietnam	0.000493466	0.00049604	0.000462163	0.000458936
Central African Republic	3	3	4	3	3	3	0	0	0	0	0	0	0	0	0	6.012	3.0333	0.4071	0.001	0.001	0.151		0.0003	0.1533	0.1533	0.5604		Central African Republic	2.57793e-07	2.54897e-07	3.25408e-07	2.33622e-07	2.26078e-07	2.296e-07	0	0	0	0	0	0	0	0	0		Central African Republic	9.42381e-07	9.31795e-07	1.18955e-06	8.54022e-07
Cyprus	55	74	108	140	134	125	130	120	130	125	150	145	135	135	135	1.389	0.700807	0.4148	0.15		0.01		0.0003	0.1603	0.167094	0.5751		Cyprus	5.15147e-06	6.8532e-06	9.57658e-06	1.18833e-05	1.10068e-05	1.04275e-05	1.15642e-05	1.0352e-05	1.11613e-05	1.07754e-05	1.27703e-05	1.19509e-05	1.07285e-05	1.11536e-05	1.12279e-05		Cyprus	1.77302e-05	2.35872e-05	3.29604e-05	4.08998e-05
Number of non-German women in childbearing age in Baden-Württemberg	377275	386028	402545	420562	441898	472210	494910	507045	520880	528235	526065	532865	591245	606290	609580	1.982												Sum significant variants	0.00551556	0.00554818	0.00545342	0.00538092	0.00540896	0.00593294	0.00678542	0.00681191	0.00703032	0.00723797	0.0071104	0.00702295	0.00705959	0.00762141	0.00787647		Sum all variants	0.0168154	0.0170884	0.0169998	0.0169293
Number of all women in childbearing age in Baden-Württemberg	2577762	2495146	2487187	2477767	2468797	2475011	2460283	2445589	2427016	2406168	2379116	2363753	2377096	2383780	2386093
Share of non-German women in childbearing age	0.146358	0.154712	0.161848	0.169734	0.178993	0.190791	0.20116	0.20733	0.214617	0.219534	0.221118	0.225432	0.248726	0.25434	0.255472
Number of live births with non-German mother in Baden-Württemberg	19180	19004	19114	19549	20774	23638	28320	28108	29151	29700	28954	29841	29399	29504	29585
Total live births in Baden-Württemberg	90695	88823	89477	91505	95632	100269	107487	107375	108919	108985	108024	113534	104549	98419	97507
Live births with non-German mother % of all live births in Baden-Württemberg	0.211478	0.213954	0.213619	0.213639	0.217229	0.235746	0.263474	0.261774	0.267639	0.272515	0.268033	0.262838	0.281198	0.29978	0.303414
Fertility rate adjustment factor	1.44494	1.38292	1.31988	1.25867	1.21361	1.23562	1.30977	1.26259	1.24705	1.24133	1.21217	1.16593	1.13056	1.17866	1.18766
Fertility adjusted haemoglobinopathy carriage rate, significant variants	0.00551556	0.00554818	0.00545342	0.00538092	0.00540896	0.00593294	0.00678542	0.00681191	0.00703032	0.00723797	0.0071104	0.00702295	0.00705959	0.00762141	0.00787647
Fertility adjusted haemoglobinopathy carriage rate, all variants	0.0168154	0.0170884	0.0169998	0.0169293	0.0172298	0.0191022	0.0220697	0.0224123	0.0233818	0.0243957	0.0241272	0.0241776	0.0247714	0.0272686	0.0287592
Fertility adjusted haemoglobinopathy carriage rate (country weighted), significant variants	0.00512858	0.00517829	0.00509905	0.00507838	0.00515638	0.00584645	0.00703038	0.0072215	0.00760613	0.00797033	0.00786564	0.00785161	0.00799233	0.00871182	0.0091449
Fertility adjusted haemoglobinopathy carriage rate (country weighted), all variants	0.0165653	0.0168766	0.0167959	0.0168339	0.0172139	0.0195846	0.0236694	0.0244081	0.0258327	0.027285	0.0270645	0.0273514	0.0283609	0.031413	0.0335141
CF: haemoglobinopathies carrier frequency in pregnancies; SV: only significant variants; AV: any variant; TFR (2023): total fertility rate as published for the year 2023; Cw FRF: country-specific fertility-rate weighting factor
[truncated: 43 more columns]

## Sheet: S3
Bavaria	2010	2011	2012	2013	2014	2015	2016	2017	2018	2019	2020	2021	2022	2023	2024	TFR 2023	Cw FRF 20203	CF any alpha variant	CF A/ß-Thal.	CF A/HbC	CF A/HbS	CF A/HbE	CF other beta variants	CF any beta variant	CF, SV (a/b coincidence)	CF, AV (a/b coincidence)		significant variants	2010	2011	2012	2013	2014	2015	2016	2017	2018	2019	2020	2021	2022	2023	2024		all variants	2010	2011	2012	2013
Afghanistan	2070	2114	2286	2453	2750	3640	6155	6120	6305	6590	6795	7955	9750	10555	11385	4.84	2.44198	0.151944	0.03				0.0003	0.0303	0.0303	0.182244		Afghanistan	3.02615e-05	2.99456e-05	3.14373e-05	3.24575e-05	3.57553e-05	4.68226e-05	8.35233e-05	8.23176e-05	8.55418e-05	8.96554e-05	8.9312e-05	0.000100009	0.000116841	0.000129947	0.000142566		Afghanistan	0.000182012	0.000180112	0.000189084	0.000195221
Egypt	348	368	418	465	566	643	755	840	950	1095	1205	1395	1620	1880	1940	2.75	1.38749	0.161989	0.02		0.002		0.0003	0.0223	0.0223	0.184289		Egypt	3.74422e-06	3.83653e-06	4.23065e-06	4.52827e-06	5.41609e-06	6.08734e-06	7.5403e-06	8.31539e-06	9.48592e-06	1.0964e-05	1.16565e-05	1.29073e-05	1.42879e-05	1.70345e-05	1.78791e-05		Egypt	3.09426e-05	3.17054e-05	3.49626e-05	3.74221e-05
Albania	698	732	824	966	1260	2273	1800	2105	2605	3275	3880	4620	5460	6045	6290	1.348	0.680121	0.0879363	0.05	0	0.03	0	0.0003	0.0803	0.0803	0.168236		Albania	2.70426e-05	2.74797e-05	3.0031e-05	3.38741e-05	4.34161e-05	7.74866e-05	6.47329e-05	7.50354e-05	9.36643e-05	0.00011808	0.000135153	0.000153927	0.000173404	0.000197232	0.00020874		Albania	5.66568e-05	5.75727e-05	6.29178e-05	7.09695e-05
Algeria	252	258	278	285	296	316	335	345	350	355	370	405	465	590	815	2.766	1.39556	0.346633	0.035	0.012	0.009		0.0003	0.0563	0.0563	0.402933		Algeria	6.84519e-06	6.79069e-06	7.10362e-06	7.00693e-06	7.15097e-06	7.55279e-06	8.44676e-06	8.62236e-06	8.82322e-06	8.97398e-06	9.03624e-06	9.46062e-06	1.03541e-05	1.34967e-05	1.89629e-05		Algeria	4.89903e-05	4.86002e-05	5.08398e-05	5.01478e-05
Andorra	0	1	1	0	2	4	5	5	5	5	5	5	5	0	0	1.082	0.545913	0	0.001				0.0003	0.0013	0.0013	0.0013		Andorra	0	6.07755e-10	5.90024e-10	0	1.11568e-09	2.20757e-09	2.91105e-09	2.88544e-09	2.91048e-09	2.91851e-09	2.81962e-09	2.69693e-09	2.57077e-09	0	0		Andorra	0	6.07755e-10	5.90024e-10	0
Angola	213	201	206	196	195	188	170	165	150	135	145	140	145	140	145	5.124	2.58527	0.406157	0.00075		0.247		0.0003	0.24805	0.24805	0.654207		Angola	2.54915e-05	2.33088e-05	2.31917e-05	2.1231e-05	2.07558e-05	1.97974e-05	1.88854e-05	1.81686e-05	1.66602e-05	1.50356e-05	1.56022e-05	1.44087e-05	1.42252e-05	1.41102e-05	1.48644e-05		Angola	6.72313e-05	6.14747e-05	6.11658e-05	5.59946e-05
Antigua and Barbuda	0	0	0	0	0	0	0	0	0	0	0	0	0	0	0	1.578	0.796165	0.213231	0.01	0.02	0.1		0.0003	0.1303	0.1303	0.343531		Antigua and Barbuda	0	0	0	0	0	0	0	0	0	0	0	0	0	0	0		Antigua and Barbuda	0	0	0	0
Equatorial Guinea	2	3	4	3	3	4	0	0	0	0	0	0	0	0	0	4.081	2.05903	0.4071	0.00075		0.2		0.0003	0.20105	0.20105	0.60815		Equatorial Guinea	1.94004e-07	2.81975e-07	3.64998e-07	2.6339e-07	2.58815e-07	3.4141e-07	0	0	0	0	0	0	0	0	0		Equatorial Guinea	5.86837e-07	8.52938e-07	1.10407e-06	7.96722e-07
Argentina	313	305	328	307	311	312	300	315	375	415	420	515	635	710	785	1.5	0.756811	0.0218768	0.01				0.0003	0.0103	0.0103	0.0321768		Argentina	1.55546e-06	1.46866e-06	1.53334e-06	1.38086e-06	1.37456e-06	1.36428e-06	1.38387e-06	1.44028e-06	1.7295e-06	1.91926e-06	1.87657e-06	2.2009e-06	2.58679e-06	2.97141e-06	3.34154e-06		Argentina	4.8592e-06	4.58805e-06	4.79009e-06	4.31376e-06
Armenia	452	484	530	642	811	963	1165	1230	1220	1200	1195	1240	1405	1410	1410	1.9	0.958628	0.019899	0.02				0.0003	0.0203	0.0203	0.040199		Armenia	4.42702e-06	4.59332e-06	4.88313e-06	5.69123e-06	7.0645e-06	8.29916e-06	1.05915e-05	1.10841e-05	1.10894e-05	1.09377e-05	1.0523e-05	1.04442e-05	1.12803e-05	1.16301e-05	1.18292e-05		Armenia	8.76659e-06	9.09591e-06	9.6698e-06	1.127e-05
Azerbaijan	536	591	645	754	875	1039	1275	1355	1395	1410	1465	1470	1740	2030	2200	1.55	0.782038	0.316272	0.054		0.006		0.0003	0.0603	0.0603	0.376572		Azerbaijan	1.55941e-05	1.66606e-05	1.76524e-05	1.98547e-05	2.26407e-05	2.65977e-05	3.44322e-05	3.62706e-05	3.76654e-05	3.81755e-05	3.83206e-05	3.67782e-05	4.1497e-05	4.9737e-05	5.48251e-05		Azerbaijan	9.73846e-05	0.000104045	0.000110239	0.000123992
Ethiopia	1053	1134	1270	1406	1574	2086	2535	2500	2500	2480	2420	2395	2395	2445	2450	3.989	2.01261	0.0198931	0.005	0	0.001		0.0003	0.0063	0.0063	0.0261931		Ethiopia	3.20071e-06	3.33994e-06	3.63137e-06	3.86813e-06	4.2551e-06	5.57913e-06	7.15246e-06	6.99164e-06	7.05231e-06	7.01521e-06	6.61353e-06	6.2604e-06	5.96755e-06	6.25872e-06	6.37891e-06		Ethiopia	1.33074e-05	1.38862e-05	1.50979e-05	1.60822e-05
Australia	587	627	668	680	720	775	765	705	725	715	675	690	670	705	715	1.5	0.756811	0.0363039	0.00425757	8.18525e-05	0.00113573	0.00433954	5.97528e-05	0.00987444	0.0122397	0.0461784		Australia	3.46646e-06	3.58776e-06	3.71085e-06	3.63458e-06	3.78154e-06	4.02703e-06	4.19343e-06	3.83053e-06	3.97338e-06	3.92939e-06	3.58387e-06	3.5041e-06	3.24336e-06	3.50612e-06	3.61674e-06		Australia	1.30784e-05	1.3536e-05	1.40004e-05	1.37127e-05
Bahamas	3	4	4	3	3	3	0	0	0	0	0	0	0	0	0	1.373	0.692735	0.291373	0.01	0.03	0.14		0.0003	0.1803	0.1803	0.471673		Bahamas	2.60972e-07	3.37164e-07	3.27327e-07	2.36206e-07	2.32104e-07	2.2963e-07	0	0	0	0	0	0	0	0	0		Bahamas	6.82714e-07	8.82036e-07	8.56302e-07	6.17926e-07
Bahrain	14	10	15	17	19	25	0	0	0	0	5	5	5	5	0	1.824	0.920283	0.554856	0.029		0.138		0.0003	0.1673	0.167766	0.722156		Bahrain	1.1332e-06	7.84312e-07	1.14214e-06	1.24545e-06	1.3678e-06	1.78055e-06	0	0	0	0	3.63874e-07	3.4804e-07	3.31759e-07	3.40832e-07	0		Bahrain	4.87793e-06	3.37611e-06	4.91642e-06	5.36111e-06
Bangladesh	196	209	229	243	260	290	330	360	415	470	495	580	675	805	920	2.163	1.09132	0.495591	0.025			0.04	0.0003	0.0653	0.0653	0.560891		Bangladesh	6.17513e-06	6.38036e-06	6.78696e-06	6.92938e-06	7.28536e-06	8.03939e-06	9.65082e-06	1.04355e-05	1.21342e-05	1.37803e-05	1.40215e-05	1.57144e-05	1.74328e-05	2.13587e-05	2.48279e-05		Bangladesh	5.3041e-05	5.48038e-05	5.82962e-05	5.95195e-05
Barbados	5	5	3	3	3	3	0	5	0	0	0	0	0	0	0	1.708	0.861756	0.151943	0.005	0.046	0.07		0.0003	0.1213	0.1213	0.273243		Barbados	2.92622e-07	2.83541e-07	1.65161e-07	1.58912e-07	1.56152e-07	1.54488e-07	0	2.69234e-07	0	0	0	0	0	0	0		Barbados	6.59168e-07	6.38712e-07	3.72046e-07	3.57969e-07
Belarus	1570	1626	1687	1738	1825	1944	1985	2050	2110	2185	2245	2330	2495	2615	2255	1.208	0.609485	0	0.001				0.0003	0.0013	0.0013	0.0013		Belarus	9.84736e-07	9.8821e-07	9.95371e-07	9.86661e-07	1.01805e-06	1.07288e-06	1.15569e-06	1.18303e-06	1.22822e-06	1.27539e-06	1.26601e-06	1.25677e-06	1.28281e-06	1.38128e-06	1.21152e-06		Belarus	9.84736e-07	9.8821e-07	9.95371e-07	9.86661e-07
Belgium	597	586	617	670	709	707	700	715	725	730	705	730	745	750	720	1.47	0.741675	0.027938	0.00335428	0.000486604	0.00568933	0.000388821	0.0003	0.010219	0.0103997	0.0381571		Belgium	2.99552e-06	2.84907e-06	2.91227e-06	3.04278e-06	3.16396e-06	3.12142e-06	3.26029e-06	3.30085e-06	3.37606e-06	3.40872e-06	3.18044e-06	3.14992e-06	3.06427e-06	3.16919e-06	3.09452e-06		Belgium	1.09907e-05	1.04534e-05	1.06853e-05	1.11641e-05
Belize	2	4	3	4	3	4	0	0	0	0	0	0	0	0	0	2.007	1.01261	0.109808	0.00075	0.01	0.05		0.0003	0.06105	0.06105	0.170858		Belize	5.89105e-08	1.14165e-07	8.31253e-08	1.0664e-07	7.85908e-08	1.03671e-07	0	0	0	0	0	0	0	0	0		Belize	1.6487e-07	3.19507e-07	2.32639e-07	2.98448e-07
Benin	46	47	49	50	51	53	35	55	55	55	50	75	80	135	160	4.556	2.29869	0.406157	0.002	0.102	0.228		0.0003	0.3323	0.3323	0.738457		Benin	7.37505e-06	7.30153e-06	7.39014e-06	7.25563e-06	7.27219e-06	7.47684e-06	5.20877e-06	8.11319e-06	8.18359e-06	8.20618e-06	7.20739e-06	1.03406e-05	1.05141e-05	1.82276e-05	2.1973e-05		Benin	1.63893e-05	1.62259e-05	1.64228e-05	1.61239e-05
Bhutan	8	9	9	9	7	6	0	0	0	0	0	0	0	0	0	1.462	0.737639	0.95976	0.00075			0.04	0.0003	0.04105	0.04105	1.00081		Bhutan	1.58446e-07	1.72719e-07	1.6768e-07	1.61336e-07	1.23304e-07	1.04563e-07	0	0	0	0	0	0	0	0	0		Bhutan	3.86294e-06	4.21095e-06	4.08809e-06	3.93341e-06
Bolivia, Plurinational State of	129	118	122	119	124	129	125	125	130	140	145	160	165	145	165	2.547	1.28507	0.0590913	0.02				0.0003	0.0203	0.0203	0.0793913		Bolivia, Plurinational State of	1.26346e-06	1.11986e-06	1.12404e-06	1.05492e-06	1.08015e-06	1.11173e-06	1.13643e-06	1.12643e-06	1.18165e-06	1.27606e-06	1.27686e-06	1.34763e-06	1.32474e-06	1.196e-06	1.38427e-06		Bolivia, Plurinational State of	4.94128e-06	4.37966e-06	4.39601e-06	4.12567e-06
Bosnia and Herzegovina	10001	9943	10111	10350	10943	11614	12670	13820	15240	16715	17755	19025	20155	21475	21855	1.486	0.749748	0.0198911	0.015				0.0003	0.0153	0.0153	0.0351911		Bosnia and Herzegovina	7.38264e-05	7.11204e-05	7.02121e-05	6.91523e-05	7.18443e-05	7.54371e-05	8.6817e-05	9.38638e-05	0.000104406	0.000114828	0.000117839	0.000120774	0.000121962	0.000133503	0.000138192		Bosnia and Herzegovina	0.000169806	0.000163582	0.000161493	0.000159055
Botswana	10	11	11	10	14	17	5	0	0	0	0	0	0	5	15	2.732	1.37841	0.124804	0.00075		0		0.0003	0.00105	0.00105	0.125854		Botswana	5.06601e-09	5.39967e-09	5.24214e-09	4.58526e-09	6.30786e-09	7.57792e-09	2.35124e-09	0	0	0	0	0	0	2.13317e-09	6.50909e-09		Botswana	6.07218e-07	6.47211e-07	6.28328e-07	5.49594e-07
Brazil	3924	3991	4016	3998	4095	4090	4080	4200	4365	4570	4525	4650	4935	5000	5035	1.619	0.816852	0.0596709	0.01	0.00616	0.02684		0.0003	0.0433	0.0433	0.102971		Brazil	8.19773e-05	8.07895e-05	7.89238e-05	7.55971e-05	7.60863e-05	7.51836e-05	7.91198e-05	8.07301e-05	8.46297e-05	8.8849e-05	8.49932e-05	8.35405e-05	8.45132e-05	8.79679e-05	9.01005e-05		Brazil	0.000194949	0.000192124	0.000187687	0.000179776
British Overseas Territories	0	0	0	19	17	18	20	15	15	15	10	10	15	15	25	n.a.		0.172628	0.01	0.02	0.08		0.0003	0.1103	0.1103	0.282928		British Overseas Territories	0	0	0	9.15174e-07	8.04617e-07	8.42869e-07	9.87967e-07	7.34455e-07	7.40828e-07	7.42874e-07	4.78468e-07	4.57648e-07	6.5436e-07	6.72254e-07	1.13961e-06		British Overseas Territories	0	0	0	2.34749e-06
Brunei Darussalam	0	0	1	1	1	0	0	0	0	0	0	0	0	0	0	1.747	0.881433	0.2431	0.03			0.01	0.0003	0.0403	0.0403	0.2834		Brunei Darussalam	0	0	1.82907e-08	1.75987e-08	1.7293e-08	0	0	0	0	0	0	0	0	0	0		Brunei Darussalam	0	0	1.28625e-07	1.23758e-07
Bulgaria	5544	6372	7669	9324	10988	12797	14260	14995	16060	16910	17835	18490	19080	19240	19090	1.81	0.913219	0	0.03				0.0003	0.0303	0.0303	0.0303		Bulgaria	8.10481e-05	9.02618e-05	0.000105465	0.000123373	0.000142865	0.000164612	0.000193508	0.000201691	0.000217891	0.000230056	0.000234419	0.000232453	0.00022865	0.000236872	0.00023905		Bulgaria	8.10481e-05	9.02618e-05	0.000105465	0.000123373
Burkina Faso	35	39	37	37	41	42	25	30	60	55	55	55	70	80	110	4.186	2.11201	0.405591	0.012	0.167	0.086		0.0003	0.2653	0.2653	0.670891		Burkina Faso	4.48004e-06	4.83713e-06	4.45518e-06	4.28661e-06	4.66752e-06	4.73041e-06	2.97039e-06	3.53311e-06	7.12754e-06	6.55161e-06	6.32962e-06	6.05419e-06	7.34489e-06	8.6237e-06	1.20606e-05		Burkina Faso	1.13291e-05	1.22321e-05	1.12663e-05	1.084e-05
Burundi	23	21	19	19	18	18	5	5	5	5	5	0	20	5	10	4.878	2.46115	0.382204	0.00075		0.189		0.0003	0.19005	0.19005	0.572254		Burundi	2.10898e-06	1.86583e-06	1.63888e-06	1.57687e-06	1.46793e-06	1.45229e-06	4.25574e-07	4.21829e-07	4.25489e-07	4.26664e-07	4.12207e-07	0	1.50331e-06	3.86104e-07	7.8543e-07		Burundi	6.35029e-06	5.61815e-06	4.93479e-06	4.74807e-06
Cape Verde	7	6	10	10	11	13	0	0	0	0	0	0	0	0	0	1.522	0.767911	0.36	0.00075		0.042		0.0003	0.04305	0.04305	0.40305		Cape Verde	1.45395e-07	1.20756e-07	1.95389e-07	1.87996e-07	2.03203e-07	2.3759e-07	0	0	0	0	0	0	0	0	0		Cape Verde	1.36124e-06	1.13057e-06	1.8293e-06	1.76008e-06
Chile	312	309	311	314	327	347	355	370	405	410	435	450	480	530	605	1.167	0.588799	0.0198931	0.01				0.0003	0.0103	0.0103	0.0301931		Chile	1.55049e-06	1.48793e-06	1.45386e-06	1.41235e-06	1.44527e-06	1.51732e-06	1.63758e-06	1.69175e-06	1.86785e-06	1.89614e-06	1.94359e-06	1.92312e-06	1.95537e-06	2.21809e-06	2.57533e-06		Chile	4.54505e-06	4.36165e-06	4.26181e-06	4.14011e-06
China	5680	5999	6614	7286	8023	8687	9530	9965	10935	11635	11570	12370	12885	13915	14870	0.999	0.504036	0.112521	0.0101174	0	0	0.000210548	0.0003	0.010628	0.0241609	0.123149		China	6.62122e-05	6.77605e-05	7.25276e-05	7.68735e-05	8.31791e-05	8.91034e-05	0.00010312	0.000106878	0.000118299	0.00012622	0.000121262	0.000124005	0.000123125	0.000136604	0.000148478		China	0.000337485	0.000345377	0.000369675	0.000391826
Costa Rica	61	57	54	66	77	91	85	85	95	120	120	135	150	175	175	1.33	0.671039	0.0446649	0.00075	0.002	0.02		0.0003	0.02305	0.02305	0.0677149		Costa Rica	6.78387e-07	6.1423e-07	5.64925e-07	6.64339e-07	7.61599e-07	8.9048e-07	8.77459e-07	8.69738e-07	9.80495e-07	1.24194e-06	1.19986e-06	1.2911e-06	1.36745e-06	1.63899e-06	1.66705e-06		Costa Rica	1.99293e-06	1.80445e-06	1.6596e-06	1.95166e-06
Côte d'Ivoire	84	88	93	98	104	116	125	155	250	245	225	210	290	495	490	4.283	2.16095	0.389764	0.039	0.063	0.084		0.0003	0.1863	0.1863	0.576064		Côte d'Ivoire	7.55038e-06	7.66445e-06	7.86361e-06	7.97285e-06	8.31402e-06	9.17451e-06	1.04294e-05	1.28187e-05	2.08547e-05	2.0494e-05	1.81833e-05	1.62326e-05	2.13678e-05	3.74701e-05	3.77267e-05		Côte d'Ivoire	2.33468e-05	2.36995e-05	2.43153e-05	2.46531e-05
Denmark	545	564	597	656	676	689	695	625	595	585	615	660	660	635	565	1.5	0.756811		0.00225396	8.50554e-05	0.000687419	0.000628425	0.0003	0.00395486	0.00417812	0.00395486		Denmark	1.09864e-06	1.10166e-06	1.13209e-06	1.19691e-06	1.21197e-06	1.22212e-06	1.30048e-06	1.1592e-06	1.11314e-06	1.09745e-06	1.11464e-06	1.14415e-06	1.09062e-06	1.07801e-06	9.75595e-07		Denmark	1.03993e-06	1.04279e-06	1.0716e-06	1.13295e-06
Dominica	12	9	12	10	10	11	5	0	0	0	0	0	0	0	0	1.484	0.748739	0.328911	0.0075	0.015	0.16		0.0003	0.1828	0.1828	0.511711		Dominica	1.05836e-06	7.69138e-07	9.95597e-07	7.98272e-07	7.84406e-07	8.53652e-07	4.09339e-07	0	0	0	0	0	0	0	0		Dominica	2.96267e-06	2.15304e-06	2.78697e-06	2.2346e-06
Dominican Republic	531	539	541	566	571	569	560	540	520	505	490	440	440	435	410	2.243	1.13169	0.252813	0.01	0.03	0.12		0.0003	0.1603	0.1603	0.413113		Dominican Republic	4.10681e-05	4.03932e-05	3.93602e-05	3.96209e-05	3.92766e-05	3.8722e-05	4.0203e-05	3.84261e-05	3.7324e-05	3.63474e-05	3.40727e-05	2.92646e-05	2.78956e-05	2.83328e-05	2.71617e-05		Dominican Republic	0.000105838	0.000104098	0.000101436	0.000102108
Djibouti	7	6	6	7	7	10	0	0	0	5	10	0	5	20	45	2.609	1.31635	0.0196773	0.00075				0.0003	0.00105	0.00105	0.0207273		Djibouti	3.54621e-09	2.94528e-09	2.85935e-09	3.20968e-09	3.15393e-09	4.4576e-09	0	0	0	2.35726e-09	4.55477e-09	0	2.07639e-09	8.53269e-09	1.95273e-08		Djibouti	7.0003e-08	5.81405e-08	5.64442e-08	6.33599e-08
Ecuador	373	356	366	368	382	407	400	380	385	440	425	465	505	545	580	1.823	0.919778	0.0224466	0.01		0.01		0.0003	0.0203	0.0203	0.0427466		Ecuador	3.65327e-06	3.37856e-06	3.37212e-06	3.26226e-06	3.32755e-06	3.50754e-06	3.63658e-06	3.42435e-06	3.49951e-06	4.01049e-06	3.74251e-06	3.91656e-06	4.0545e-06	4.4953e-06	4.86591e-06		Ecuador	7.69285e-06	7.11438e-06	7.10083e-06	6.86949e-06
El Salvador	31	38	48	45	53	64	40	60	75	60	80	85	105	110	130	1.775	0.89556	0.0340384	0.00075		0.0152		0.0003	0.01625	0.01625	0.0502884		El Salvador	2.43048e-07	2.88684e-07	3.54014e-07	3.19331e-07	3.69568e-07	4.41515e-07	2.91105e-07	4.32816e-07	5.45715e-07	4.37777e-07	5.63924e-07	5.73097e-07	6.74827e-07	7.26294e-07	8.73045e-07		El Salvador	7.52154e-07	8.93382e-07	1.09556e-06	9.88224e-07
Eritrea	291	276	266	288	767	1284	1845	2060	2205	2275	2260	2310	2430	2515	2640	3.713	1.87336	0.0198931	0.005		0.001		0.0003	0.0063	0.0063	0.0261931		Eritrea	8.84526e-07	8.12896e-07	7.60586e-07	7.92333e-07	2.07348e-06	3.43414e-06	5.20564e-06	5.76111e-06	6.22014e-06	6.43532e-06	6.17627e-06	6.03822e-06	6.05475e-06	6.43791e-06	6.8736e-06		Eritrea	3.67753e-06	3.37972e-06	3.16224e-06	3.29423e-06
Estonia	336	389	418	461	493	510	500	520	520	520	530	530	530	510	490	1.31	0.660949	0	0.001				0.0003	0.0013	0.0013	0.0013		Estonia	2.10746e-07	2.36417e-07	2.4663e-07	2.61709e-07	2.75014e-07	2.81466e-07	2.91105e-07	3.00086e-07	3.0269e-07	3.03525e-07	2.9888e-07	2.85874e-07	2.72502e-07	2.69389e-07	2.63257e-07		Estonia	2.10746e-07	2.36417e-07	2.4663e-07	2.61709e-07
Eswatini	1	1	1	1	0	2	0	0	0	0	0	0	0	0	0	2.753	1.389	0.125125	0.00075		0.005		0.0003	0.00605	0.00605	0.131175		Eswatini	2.91899e-09	2.8284e-09	2.74588e-09	2.64198e-09	0	5.13685e-09	0	0	0	0	0	0	0	0	0		Eswatini	6.32888e-08	6.13247e-08	5.95356e-08	5.72829e-08
Fiji	10	8	7	6	5	5	0	0	0	0	0	0	0	0	0	2.281	1.15086	0.351975	0.00075				0.0003	0.00105	0.00105	0.353025		Fiji	5.06601e-09	3.92704e-09	3.33591e-09	2.75116e-09	2.25281e-09	2.2288e-09	0	0	0	0	0	0	0	0	0		Fiji	1.70327e-06	1.32033e-06	1.12158e-06	9.24978e-07
Finland	778	818	830	902	922	968	980	905	920	870	845	845	855	850	835	1.26	0.635721	0.00254627	0.00132379	3.54355e-05	0.000261161	0.000288624	0.0003	0.00220901	0.00232607	0.00475527		Finland	8.73132e-07	8.89533e-07	8.76249e-07	9.1623e-07	9.20278e-07	9.55896e-07	1.02091e-06	9.34481e-07	9.58213e-07	9.08638e-07	8.52624e-07	8.15523e-07	7.86573e-07	8.03357e-07	8.02693e-07		Finland	1.78497e-06	1.8185e-06	1.79135e-06	1.87308e-06
France	5647	5759	5904	6647	6986	7100	7220	6750	6825	6710	6740	6865	6840	6745	6715	1.66	0.837538	0.0311626	0.00305514	0.000636213	0.00540286	0.00145195	0.0003	0.0108462	0.0110525	0.0420087		France	3.01131e-05	2.97573e-05	2.96165e-05	3.2082e-05	3.31325e-05	3.33143e-05	3.57384e-05	3.31179e-05	3.37764e-05	3.3299e-05	3.23145e-05	3.14816e-05	2.98997e-05	3.02907e-05	3.06723e-05		France	0.000114455	0.000113103	0.000112567	0.000121938
Gabon	6	6	8	10	16	17	5	0	0	0	0	5	5	0	0	3.647	1.84006	0.6864	0.00075	0.001	0.252		0.0003	0.25405	0.25405	0.94045		Gabon	7.3544e-07	7.12617e-07	9.22435e-07	1.10941e-06	1.74423e-06	1.8335e-06	5.68887e-07	0	0	0	0	5.27042e-07	5.02388e-07	0	0		Gabon	2.72247e-06	2.63799e-06	3.4147e-06	4.10686e-06
Gambia	40	40	39	46	50	58	45	80	105	115	130	125	140	190	175	4.006	2.02119	0.389764	0.00075	0.016	0.136		0.0003	0.15305	0.15305	0.542814		Gambia	2.95373e-06	2.86206e-06	2.7091e-06	3.07444e-06	3.28373e-06	3.76854e-06	3.08449e-06	5.43528e-06	7.19571e-06	7.90277e-06	8.63086e-06	7.93779e-06	8.47444e-06	1.18155e-05	1.10691e-05		Gambia	1.04758e-05	1.01507e-05	9.6082e-06	1.09039e-05
Georgia	1284	1331	1449	1589	1719	1880	2005	2030	2130	2175	2230	2370	2725	2945	2520	1.81	0.913219	0.019899	0.03				0.0003	0.0303	0.0303	0.050199		Georgia	1.87709e-05	1.88541e-05	1.99268e-05	2.10253e-05	2.23503e-05	2.41831e-05	2.72078e-05	2.73047e-05	2.88984e-05	2.95904e-05	2.93106e-05	2.97953e-05	3.26557e-05	3.62572e-05	3.15561e-05		Georgia	3.10983e-05	3.12362e-05	3.30134e-05	3.48332e-05
Ghana	434	456	460	467	466	490	505	510	535	540	545	595	645	660	645	3.397	1.71393	0.405968	0.003	0.112	0.158		0.0003	0.2733	0.2733	0.679268		Ghana	5.72277e-05	5.82626e-05	5.7059e-05	5.57354e-05	5.465e-05	5.68522e-05	6.18113e-05	6.1874e-05	6.54703e-05	6.62646e-05	6.46121e-05	6.74703e-05	6.97187e-05	7.32909e-05	7.28516e-05		Ghana	0.000142235	0.000144808	0.000141816	0.000138527
Grenada	3	4	4	4	4	4	0	0	0	0	0	0	0	0	0	1.487	0.750252	0.213231	0.01	0.02	0.1		0.0003	0.1303	0.1303	0.343531		Grenada	1.886e-07	2.43663e-07	2.36554e-07	2.27604e-07	2.2365e-07	2.21267e-07	0	0	0	0	0	0	0	0	0		Grenada	4.97238e-07	6.42409e-07	6.23666e-07	6.00068e-07
Greece	14247	15056	16224	17822	18821	19451	19795	19545	19885	19420	19375	19165	18830	18490	18240	1.32	0.665994	0.00957832	0.00468454	2.35023e-05	0.00245686	4.03832e-05	3.20226e-05	0.0072373	0.00727335	0.0168156		Greece	4.99959e-05	5.11952e-05	5.35573e-05	5.66064e-05	5.87411e-05	6.00604e-05	6.44803e-05	6.31057e-05	6.47606e-05	6.34208e-05	6.11299e-05	5.78362e-05	5.4167e-05	5.46434e-05	5.48276e-05		Greece	0.000115588	0.000118361	0.000123822	0.000130871
Guatemala	53	55	58	59	59	63	50	60	65	80	75	90	90	100	120	2.311	1.16599	0.0336926	0.00075				0.0003	0.00105	0.00105	0.0347426		Guatemala	2.68499e-08	2.69984e-08	2.76404e-08	2.7053e-08	2.65831e-08	2.80829e-08	2.35124e-08	2.79666e-08	3.056e-08	3.77162e-08	3.41608e-08	3.92092e-08	3.7375e-08	4.26634e-08	5.20727e-08		Guatemala	8.88414e-07	8.93328e-07	9.1457e-07	8.95136e-07
Guinea	41	42	39	39	45	44	20	30	40	45	50	75	70	65	65	4.217	2.12765	0.405205	0.00075		0.227		0.0003	0.22805	0.22805	0.633255		Guinea	4.51119e-06	4.4778e-06	4.03665e-06	3.88391e-06	4.40359e-06	4.25985e-06	2.04266e-06	3.03704e-06	4.08452e-06	4.60777e-06	4.94627e-06	7.09655e-06	6.31361e-06	6.02296e-06	6.12609e-06		Guinea	1.25268e-05	1.24341e-05	1.12091e-05	1.07849e-05
Guinea-Bissau	0	0	1	3	4	2	0	0	0	0	0	0	0	0	0	3.836	1.93542	0.405205	0.00075	0.002	0.076		0.0003	0.07905	0.07905	0.484255		Guinea-Bissau	0	0	3.5878e-08	1.03561e-07	1.35683e-07	6.71187e-08	0	0	0	0	0	0	0	0	0		Guinea-Bissau	0	0	2.19786e-07	6.3441e-07
Guyana	6	5	4	4	4	8	0	0	0	0	0	0	0	0	0	2.412	1.21695	0.109685	0.00075	0.01	0.05		0.0003	0.06105	0.06105	0.170735		Guyana	1.76731e-07	1.42706e-07	1.10834e-07	1.0664e-07	1.04788e-07	2.07342e-07	0	0	0	0	0	0	0	0	0		Guyana	4.94255e-07	3.99097e-07	3.09963e-07	2.98234e-07
Haiti	22	24	24	25	24	21	5	0	10	10	10	5	5	15	20	2.656	1.34006	0.213231	0.01	0.03	0.1		0.0003	0.1403	0.1403	0.353531		Haiti	1.48921e-06	1.57418e-06	1.52825e-06	1.5317e-06	1.44489e-06	1.2508e-06	3.1417e-07	0	6.28215e-07	6.2995e-07	6.08605e-07	2.91061e-07	2.77445e-07	8.55097e-07	1.15965e-06		Haiti	3.75255e-06	3.96665e-06	3.85093e-06	3.8596e-06
Honduras	46	49	55	57	61	63	70	70	60	75	75	110	125	135	125	2.5	1.26135	0.0336926	0.00075	0.0004	0.0016		0.0003	0.00305	0.00305	0.0367426		Honduras	6.76916e-08	6.98685e-08	7.61358e-08	7.59188e-08	7.98352e-08	8.15741e-08	9.56169e-08	9.47756e-08	8.19411e-08	1.02709e-07	9.9229e-08	1.39203e-07	1.50786e-07	1.67302e-07	1.57561e-07		Honduras	8.15464e-07	8.41689e-07	9.1719e-07	9.14576e-07
Hong Kong	0	0	0	0	7	15	15	20	50	50	65	90	110	145	150	0.751	0.37891	0.201389	0.03				0.0003	0.0303	0.07727	0.231689		Hong Kong	0	0	0	0	2.32099e-07	4.92055e-07	5.19086e-07	6.86024e-07	1.72994e-06	1.73472e-06	2.17872e-06	2.88542e-06	3.36166e-06	4.55245e-06	4.79007e-06		Hong Kong	0	0	0	0
India	2203	2495	2934	3323	3751	4333	5125	5930	7215	8815	9460	11370	14015	16690	19500	1.975	0.996468	0.495591	0.0156702	0	0.0193568	0.00972176	0.0003	0.0450487	0.0450487	0.54064		India	4.78821e-05	5.25458e-05	5.99886e-05	6.53713e-05	7.25093e-05	8.28672e-05	0.000103398	0.000118587	0.000145536	0.000178301	0.000184863	0.000212519	0.000249704	0.000305496	0.000363042		India	0.000574645	0.000630615	0.000719937	0.000784536
Indonesia	925	967	1027	1126	1200	1296	1415	1435	1485	1610	1670	1870	2040	2275	2445	2.127	1.07316	0.0784	0.039651	0	0	0.0187238	0.0003	0.0586748	0.0586748	0.137075		Indonesia	2.61861e-05	2.65255e-05	2.73495e-05	2.88513e-05	3.02133e-05	3.22826e-05	3.71831e-05	3.73768e-05	3.90148e-05	4.24156e-05	4.25056e-05	4.5525e-05	4.73404e-05	5.42375e-05	5.92885e-05		Indonesia	6.11753e-05	6.19683e-05	6.38932e-05	6.74017e-05
Iraq	4187	4542	4867	4915	5097	6131	8485	8735	9085	9400	9395	9795	9815	9515	8785	3.249	1.63925	0.231914	0.03		0.03		0.0003	0.0603	0.0603	0.292214		Iraq	0.000121814	0.000128041	0.0001332	0.000129424	0.000131885	0.00015695	0.000229143	0.000233818	0.000245298	0.000254503	0.000245749	0.000245063	0.000234076	0.000233127	0.000218927		Iraq	0.000590311	0.000620488	0.000645489	0.00062719
Iran, Islamic Republic of	1141	1179	1324	1455	1467	1629	2105	2280	2625	2910	3095	3440	4265	4940	5500	1.695	0.855197	0.125064	0.03		0.01		0.0003	0.0403	0.0403	0.165364		Iran, Islamic Republic of	2.21854e-05	2.22129e-05	2.42169e-05	2.56061e-05	2.53688e-05	2.78701e-05	3.79922e-05	4.07886e-05	4.7368e-05	5.26558e-05	5.41057e-05	5.75201e-05	6.79789e-05	8.08907e-05	9.16026e-05		Iran, Islamic Republic of	9.10339e-05	9.11465e-05	9.937e-05	0.00010507
Ireland	672	696	707	761	773	819	800	775	745	780	765	815	810	850	845	1.5	0.756811	0.0113288	0.00141037	0.000200032	0.000962482	0.000135415	0.0003	0.0030083	0.00317552	0.0143371		Ireland	1.02958e-06	1.03326e-06	1.01897e-06	1.0553e-06	1.05332e-06	1.10411e-06	1.13774e-06	1.09248e-06	1.05931e-06	1.11214e-06	1.05379e-06	1.07381e-06	1.0173e-06	1.09673e-06	1.10895e-06		Ireland	4.64844e-06	4.66505e-06	4.60052e-06	4.76454e-06
Iceland	61	63	63	62	69	78	75	75	80	65	65	80	70	55	45	1.59	0.80222	0	0.001				0.0003	0.0013	0.0013	0.0013		Iceland	3.82604e-08	3.82886e-08	3.71715e-08	3.51973e-08	3.84908e-08	4.30477e-08	4.36658e-08	4.32816e-08	4.65676e-08	3.79407e-08	3.66551e-08	4.31509e-08	3.59908e-08	2.90518e-08	2.41766e-08		Iceland	3.82604e-08	3.82886e-08	3.71715e-08	3.51973e-08
Israel	364	379	400	424	441	466	500	465	475	500	470	475	495	575	545	2.85	1.43794	0.0591	0.005				0.0003	0.0053	0.0053	0.0644		Israel	9.30795e-07	9.39076e-07	9.62193e-07	9.81333e-07	1.00295e-06	1.04851e-06	1.18681e-06	1.09403e-06	1.12725e-06	1.18986e-06	1.08057e-06	1.04454e-06	1.0376e-06	1.23826e-06	1.19375e-06		Israel	1.131e-05	1.14107e-05	1.16916e-05	1.19241e-05
Italy	18973	19197	19829	21653	23097	24230	24990	24910	25405	25320	25150	25470	25420	25280	25255	1.2	0.605449	0.00568991	0.0319977	0.000175553	0.00223009	7.49446e-05	0.0003	0.0347783	0.0348457	0.0404682		Italy	0.000318979	0.000312729	0.0003136	0.00032949	0.000345358	0.000358438	0.000389989	0.00038532	0.000396387	0.000396151	0.000380159	0.000368243	0.000350328	0.000357926	0.000363694		Italy	0.000370447	0.000363189	0.000364201	0.000382654
Jamaica	138	131	127	121	120	121	105	115	110	105	100	105	80	75	65	1.358	0.685166	0.251775	0.01	0.04	0.11		0.0003	0.1603	0.1603	0.412075		Jamaica	1.06731e-05	9.81726e-06	9.23982e-06	8.4702e-06	8.25429e-06	8.23438e-06	7.53806e-06	8.18333e-06	7.89545e-06	7.55738e-06	6.95362e-06	6.98359e-06	5.07193e-06	4.88496e-06	4.30613e-06		Jamaica	2.74367e-05	2.52367e-05	2.37523e-05	2.17739e-05
Japan	2042	2167	2296	2365	2415	2533	2525	2520	2610	2575	2355	2440	2470	2530	2480	1.2	0.605449	0	0.00075				0.0003	0.00105	0.00105	0.00105		Japan	1.03448e-06	1.06374e-06	1.09418e-06	1.08441e-06	1.08811e-06	1.12911e-06	1.18737e-06	1.1746e-06	1.2271e-06	1.21399e-06	1.07265e-06	1.063e-06	1.02574e-06	1.07938e-06	1.07617e-06		Japan	1.03448e-06	1.06374e-06	1.09418e-06	1.08441e-06
Yemen	33	34	45	46	53	75	65	60	120	200	200	235	290	435	585	4.59	2.31584	0.556721	0.0236		0.0095		0.0003	0.0334	0.0334	0.590121		Yemen	5.31786e-07	5.30898e-07	6.82159e-07	6.70933e-07	7.59604e-07	1.06346e-06	9.72292e-07	8.89603e-07	1.79465e-06	2.99933e-06	2.8977e-06	3.25664e-06	3.83084e-06	5.9034e-06	8.07499e-06		Yemen	9.39577e-06	9.38006e-06	1.20526e-05	1.18542e-05
Jordan	200	211	242	265	299	338	375	415	450	515	520	575	655	740	760	2.639	1.33148	0.240555	0.035		0.0022		0.0003	0.0375	0.0375	0.278055		Jordan	3.61858e-06	3.69913e-06	4.11882e-06	4.33962e-06	4.81135e-06	5.38096e-06	6.29795e-06	6.90841e-06	7.55605e-06	8.67135e-06	8.45887e-06	8.94654e-06	9.71454e-06	1.12753e-05	1.17784e-05		Jordan	2.68311e-05	2.74283e-05	3.05403e-05	3.21775e-05
Yugoslavia, Federal Republic of (April 27, 1992-February 4, 2003)	3049	2674	2334	1998	1947	1845	1750	1670	1720	1515	1345	1140	1015	875	715	n.a.												Yugoslavia, Federal Republic of (April 27, 1992-February 4, 2003)																	Yugoslavia, Federal Republic of (April 27, 1992-February 4, 2003)
Yugoslavia, Socialist Federal Republic (until 04/26/1992)	0	0	0	0	0	0	0	0	0	0	0	0	0	0	0	n.a.												Yugoslavia, Socialist Federal Republic (until 04/26/1992)																	Yugoslavia, Socialist Federal Republic (until 04/26/1992)
Cambodia	69	76	80	87	98	100	90	85	90	100	105	100	100	100	85	2.579	1.30121	0.4228	0.03			0.3	0.0003	0.3303	0.343876	0.7531		Cambodia	1.1448e-05	1.2218e-05	1.24859e-05	1.30646e-05	1.44608e-05	1.45987e-05	1.38606e-05	1.29754e-05	1.38578e-05	1.54401e-05	1.56628e-05	1.42678e-05	1.36004e-05	1.39723e-05	1.20798e-05		Cambodia	2.50714e-05	2.67579e-05	2.73444e-05	2.86119e-05
Cameroon	390	396	464	551	625	665	695	720	770	850	860	895	955	1000	1105	4.322	2.18063	0.406346	0.002	0.003	0.2		0.0003	0.2053	0.2053	0.611646		Cameroon	3.86305e-05	3.80075e-05	4.32348e-05	4.93987e-05	5.50597e-05	5.79592e-05	6.39014e-05	6.56175e-05	7.07833e-05	7.83531e-05	7.65887e-05	7.62374e-05	7.75429e-05	8.34172e-05	9.37543e-05		Cameroon	0.000115091	0.000113235	0.000128808	0.000147172
Canada	829	865	909	935	1003	1083	1100	1090	1150	1125	1085	1095	1140	1200	1225	1.26	0.635721	0.0408197	0.00503104	0.000969899	0.00475696	0.00246564	0.000299766	0.0135233	0.0152271	0.054343		Canada	6.09046e-06	6.15772e-06	6.28216e-06	6.21734e-06	6.55366e-06	7.00098e-06	7.5015e-06	7.3679e-06	7.84093e-06	7.69165e-06	7.16681e-06	6.91813e-06	6.86552e-06	7.42448e-06	7.70894e-06		Canada	2.17358e-05	2.19758e-05	2.24199e-05	2.21886e-05
Kazakhstan	3591	3427	3288	3171	3071	3049	2980	2965	2915	2940	2900	2895	2880	2795	2565	3.012	1.51968	0.0687378	0.00075				0.0003	0.00105	0.00105	0.0697878		Kazakhstan	1.8192e-06	1.68224e-06	1.56692e-06	1.45399e-06	1.38367e-06	1.35912e-06	1.40134e-06	1.38201e-06	1.3705e-06	1.38607e-06	1.32088e-06	1.26123e-06	1.196e-06	1.19244e-06	1.11305e-06		Kazakhstan	0.000120913	0.00011181	0.000104145	9.66386e-05
Qatar	17	20	33	58	90	92	100	75	60	75	45	95	65	45	30	1.729	0.872351	0.231914	0.03		0.03		0.0003	0.0603	0.0603	0.292214		Qatar	4.94587e-07	5.6381e-07	9.03145e-07	1.52728e-06	2.32876e-06	2.35514e-06	2.70056e-06	2.0076e-06	1.62002e-06	2.03061e-06	1.17708e-06	2.37682e-06	1.55017e-06	1.10254e-06	7.47616e-07		Qatar	2.39677e-06	2.73223e-06	4.37665e-06	7.40123e-06
Kenya	1024	1050	1107	1118	1122	1162	1185	1160	1180	1205	1160	1185	1190	1215	1185	3.208	1.61857	0.406911	0.0015		0.1666		0.0003	0.1684	0.1684	0.575311		Kenya	8.31992e-05	8.26641e-05	8.46089e-05	8.22164e-05	8.10774e-05	8.3073e-05	8.93712e-05	8.67159e-05	8.89764e-05	9.11124e-05	8.47379e-05	8.27974e-05	7.92572e-05	8.31352e-05	8.24708e-05		Kenya	0.000284236	0.000282408	0.000289053	0.000280879
Kyrgyzstan	467	478	472	473	451	432	455	460	535	560	575	655	805	920	965	2.7	1.36226	0.0678496	0.00075				0.0003	0.00105	0.00105	0.0688996		Kyrgyzstan	2.36583e-07	2.3464e-07	2.24935e-07	2.16883e-07	2.03203e-07	1.92568e-07	2.13962e-07	2.1441e-07	2.51532e-07	2.64013e-07	2.619e-07	2.85356e-07	3.34299e-07	3.92504e-07	4.18752e-07		Kyrgyzstan	1.55242e-05	1.53968e-05	1.47599e-05	1.42316e-05
Kiribati	1	1	1	1	1	1	0	0	0	0	0	0	0	0	0	3.147	1.58779	0.0199	0.00075				0.0003	0.00105	0.00105	0.02095		Kiribati	5.06601e-10	4.90879e-10	4.76558e-10	4.58526e-10	4.50561e-10	4.4576e-10	0	0	0	0	0	0	0	0	0		Kiribati	1.01079e-08	9.79421e-09	9.50846e-09	9.14869e-09
Colombia	847	913	979	1069	1145	1241	1315	1410	1595	1770	1810	2005	2175	2405	2470	1.645	0.82997	0.0759438	0.00860084	0.0254645	0.0328902	0.000187691	0.0003	0.0674432	0.0701326	0.143387		Colombia	2.86603e-05	2.99348e-05	3.11623e-05	3.27395e-05	3.4458e-05	3.69491e-05	4.13031e-05	4.38973e-05	5.00878e-05	5.57367e-05	5.50651e-05	5.83432e-05	6.03294e-05	6.85333e-05	7.15907e-05		Colombia	5.85963e-05	6.1202e-05	6.37116e-05	6.69364e-05
Comoros	3	3	3	3	4	10	0	0	0	0	0	0	0	0	0	3.878	1.95661	0.234375	0.01		0.008		0.0003	0.0183	0.0183	0.252675		Comoros	2.6488e-08	2.5666e-08	2.49172e-08	2.39744e-08	3.14106e-08	7.76896e-08	0	0	0	0	0	0	0	0	0		Comoros	3.6573e-07	3.5438e-07	3.44041e-07	3.31023e-07
Congo, Democratic Republic	317	339	383	400	427	435	445	470	475	490	520	525	620	720	785	6.051	3.05298	0.690864	0.00075		0.186		0.0003	0.18705	0.18705	0.877914		Congo, Democratic Republic	2.86084e-05	2.96444e-05	3.25149e-05	3.26733e-05	3.42729e-05	3.45429e-05	3.72782e-05	3.9026e-05	3.97834e-05	4.1153e-05	4.21928e-05	4.07449e-05	4.58669e-05	5.47213e-05	6.0683e-05		Congo, Democratic Republic	0.000134273	0.000139135	0.000152608	0.000153351
Congo, Republic	41	36	27	33	34	42	20	25	25	35	20	40	55	75	55	4.157	2.09738	0.690864	0.00075		0.251		0.0003	0.25205	0.25205	0.942914		Congo, Republic	4.98594e-06	4.24204e-06	3.08871e-06	3.63225e-06	3.67731e-06	4.49415e-06	2.25763e-06	2.79721e-06	2.82148e-06	3.96098e-06	2.18673e-06	4.18314e-06	5.48276e-06	7.68094e-06	5.72914e-06		Congo, Republic	1.86523e-05	1.58694e-05	1.15548e-05	1.35882e-05
Korea, Democratic People's Republic	49	44	42	43	42	40	20	20	25	0	0	10	5	5	0	1.78	0.898083	0	0.00075				0.0003	0.00105	0.00105	0.00105		Korea, Democratic People's Republic	2.48235e-08	2.15987e-08	2.00154e-08	1.97166e-08	1.89236e-08	1.78304e-08	9.40494e-09	9.32219e-09	1.17539e-08	0	0	4.35658e-09	2.07639e-09	2.13317e-09	0		Korea, Democratic People's Republic	2.48235e-08	2.15987e-08	2.00154e-08	1.97166e-08
Korea, Republic	935	1024	1116	1228	1307	1456	1540	1720	1785	2000	1810	1975	2170	2285	2405	0.721	0.363774	0	0.00075				0.0003	0.00105	0.00105	0.00105		Korea, Republic	4.73672e-07	5.0266e-07	5.31839e-07	5.6307e-07	5.88884e-07	6.49027e-07	7.24181e-07	8.01708e-07	8.39225e-07	9.42904e-07	8.24414e-07	8.60424e-07	9.01154e-07	9.74859e-07	1.04362e-06		Korea, Republic	4.73672e-07	5.0266e-07	5.31839e-07	5.6307e-07
Kosovo	6351	8149	10104	11158	12171	13563	13795	14685	15820	17310	18445	20680	21745	22855	23440	1.545	0.779516											Kosovo																	Kosovo
Croatia	13895	13962	14153	15208	17258	20405	23715	26790	30050	31845	33195	34080	34145	33935	33585	1.46	0.73663	0.0198911	0.005				0.0003	0.0053	0.0053	0.0251911		Croatia	3.55313e-05	3.45947e-05	3.40448e-05	3.51984e-05	3.92492e-05	4.59118e-05	5.62906e-05	6.303e-05	7.13134e-05	7.57819e-05	7.63178e-05	7.49431e-05	7.15736e-05	7.30786e-05	7.35633e-05		Croatia	0.000168882	0.00016443	0.000161816	0.000167299
Cuba	827	810	794	784	785	789	775	725	705	670	630	625	680	735	655	1.439	0.726034	0.251775	0.005	0.017	0.083		0.0003	0.1053	0.1053	0.357075		Cuba	4.20156e-05	3.98748e-05	3.79468e-05	3.60512e-05	3.54701e-05	3.5271e-05	3.65483e-05	3.38895e-05	3.32406e-05	3.16775e-05	2.87771e-05	2.73064e-05	2.83196e-05	3.14472e-05	2.85042e-05		Cuba	0.000142476	0.000135217	0.000128679	0.00012225
Kuwait	22	21	23	40	126	204	250	205	205	80	70	55	45	65	40	1.524	0.76892	0.23198	0.00075		0.04		0.0003	0.04105	0.04105	0.27303		Kuwait	4.35725e-07	4.03012e-07	4.28516e-07	7.17047e-07	2.21947e-06	3.55513e-06	4.59611e-06	3.73564e-06	3.76806e-06	1.47452e-06	1.24649e-06	9.36768e-07	7.30593e-07	1.08416e-06	6.78599e-07		Kuwait	2.89807e-06	2.68049e-06	2.85013e-06	4.76919e-06
Laos, People's Democratic Republic	60	63	62	70	72	74	70	65	80	95	95	80	80	80	70	2.421	1.22149	0.407512	0.0204	0	0	0.272	0.0003	0.2927	0.301158	0.700212		Laos, People's Democratic Republic	8.71811e-06	8.86993e-06	8.47446e-06	9.20591e-06	9.30446e-06	9.46102e-06	9.44124e-06	8.68972e-06	1.07879e-05	1.28459e-05	1.24107e-05	9.99632e-06	9.52871e-06	9.78928e-06	8.71228e-06		Laos, People's Democratic Republic	2.02702e-05	2.06232e-05	1.97037e-05	2.14044e-05
Lesotho	4	3	3	3	3	2	0	0	0	0	0	0	0	0	0	2.694	1.35923	0.12448	0.00075				0.0003	0.00105	0.00105	0.12553		Lesotho	2.0264e-09	1.47264e-09	1.42967e-09	1.37558e-09	1.35168e-09	8.9152e-10	0	0	0	0	0	0	0	0	0		Lesotho	2.42262e-07	1.76058e-07	1.70922e-07	1.64454e-07
Latvia	768	960	1135	1318	1421	1487	1545	1565	1600	1645	1635	1640	1645	1650	1590	1.36	0.686176	0	0.001				0.0003	0.0013	0.0013	0.0013		Latvia	4.81705e-07	5.83445e-07	6.69677e-07	7.48227e-07	7.92688e-07	8.20666e-07	8.99516e-07	9.03142e-07	9.31353e-07	9.60191e-07	9.22016e-07	8.84593e-07	8.45783e-07	8.71553e-07	8.54241e-07		Latvia	4.81705e-07	5.83445e-07	6.69677e-07	7.48227e-07
Lebanon	317	310	307	301	295	299	335	365	370	380	380	450	495	510	510	2.239	1.12967	0.0296036	0.03		0.01		0.0003	0.0403	0.0403	0.0699036		Lebanon	6.1637e-06	5.84053e-06	5.61526e-06	5.2972e-06	5.10143e-06	5.1155e-06	6.04626e-06	6.52975e-06	6.67664e-06	6.87602e-06	6.64303e-06	7.52443e-06	7.88969e-06	8.35106e-06	8.49405e-06		Lebanon	1.06914e-05	1.01309e-05	9.74012e-06	9.18842e-06
Liberia	19	17	16	13	13	14	0	0	0	5	0	0	5	0	5	3.95	1.99294	0.406628	0.077	0.009	0.055		0.0003	0.1413	0.1413	0.547928		Liberia	1.29531e-06	1.12299e-06	1.0261e-06	8.02159e-07	7.88225e-07	8.39812e-07	0	0	0	3.1722e-07	0	0	2.79423e-07	0	2.91979e-07		Liberia	5.0229e-06	4.3547e-06	3.97897e-06	3.11058e-06
Libya	36	27	42	66	87	97	115	100	100	120	105	110	130	130	115	2.355	1.18819	0.345434	0.003	0.002	0.02		0.0003	0.0253	0.0253	0.370734		Libya	4.3944e-07	3.19352e-07	4.82277e-07	7.29187e-07	9.44505e-07	1.04185e-06	1.30303e-06	1.1231e-06	1.13285e-06	1.36317e-06	1.15236e-06	1.1547e-06	1.30081e-06	1.33638e-06	1.20243e-06		Libya	6.43934e-06	4.67963e-06	7.06704e-06	1.06851e-05
Liechtenstein	15	15	14	15	18	18	5	5	0	0	0	0	5	5	15	1.45	0.731584	0	0.001				0.0003	0.0013	0.0013	0.0013		Liechtenstein	9.40831e-09	9.11633e-09	8.26034e-09	8.51548e-09	1.00411e-08	9.93408e-09	2.91105e-09	2.88544e-09	0	0	0	0	2.57077e-09	2.64107e-09	8.05888e-09		Liechtenstein	9.40831e-09	9.11633e-09	8.26034e-09	8.51548e-09
Lithuania	1270	1433	1566	1742	1837	1954	2030	2080	2175	2195	2200	2210	2160	2135	2105	1.18	0.595358	0	0.001				0.0003	0.0013	0.0013	0.0013		Lithuania	7.9657e-07	8.70914e-07	9.23978e-07	9.88932e-07	1.02475e-06	1.0784e-06	1.18189e-06	1.20034e-06	1.26606e-06	1.28123e-06	1.24063e-06	1.19204e-06	1.11057e-06	1.12774e-06	1.13093e-06		Lithuania	7.9657e-07	8.70914e-07	9.23978e-07	9.88932e-07
Luxembourg	192	213	229	276	298	306	315	305	330	365	375	390	415	440	485	1.25	0.630676	0.0163591	0.00471612	0.000117695	0.00144637	1.38947e-05	0.0003	0.00659408	0.00676816	0.0229532		Luxembourg	6.26972e-07	6.73962e-07	7.03448e-07	8.15744e-07	8.65469e-07	8.79232e-07	9.54812e-07	9.16365e-07	1.00008e-06	1.1092e-06	1.10098e-06	1.09519e-06	1.11088e-06	1.21001e-06	1.3566e-06		Luxembourg	2.12629e-06	2.28565e-06	2.38564e-06	2.76648e-06
Macau	0	0	0	0	0	2	0	0	0	0	0	0	0	0	0	0.586	0.295661	0.201389	0.03				0.0003	0.0303	0.07727	0.231689		Macau	0	0	0	0	0	6.56074e-08	0	0	0	0	0	0	0	0	0		Macau	0	0	0	0
Madagascar	115	133	165	188	206	240	260	295	345	370	410	475	500	575	735	3.972	2.00404	0.359148	0.0015		0.11695		0.0003	0.11875	0.11875	0.477898		Madagascar	6.58885e-06	7.38367e-06	8.89294e-06	9.74917e-06	1.0497e-05	1.20992e-05	1.38276e-05	1.55509e-05	1.83445e-05	1.97281e-05	2.11201e-05	2.34037e-05	2.34831e-05	2.7744e-05	3.60713e-05		Madagascar	2.65161e-05	2.97148e-05	3.57887e-05	3.92345e-05
Malawi	6	7	8	8	7	9	0	0	0	0	0	0	0	0	0	3.648	1.84057	0.381308	0.0015	0	0.049	0	0.0003	0.0508	0.0508	0.432108		Malawi	1.47059e-07	1.66244e-07	1.84451e-07	1.77471e-07	1.5259e-07	1.94097e-07	0	0	0	0	0	0	0	0	0		Malawi	1.25089e-06	1.41409e-06	1.56895e-06	1.50958e-06
Malaysia	278	278	300	308	323	330	365	375	420	450	455	535	570	600	635	1.55	0.782038	0.264308	0.0165802	0	0	0.0550568	0.0003	0.071937	0.0877329	0.336245		Malaysia	1.17675e-05	1.14023e-05	1.19457e-05	1.18002e-05	1.21599e-05	1.2291e-05	1.43414e-05	1.46047e-05	1.64992e-05	1.77265e-05	1.73162e-05	1.94748e-05	1.97782e-05	2.13885e-05	2.30237e-05		Malaysia	4.51e-05	4.37004e-05	4.57829e-05	4.52252e-05
Maldives	2	2	2	2	2	3	0	0	0	0	0	0	0	0	0	1.575	0.794652	0.496	0.1734		0.0014	0.0097	0.003	0.1875	0.1875	0.6835		Maldives	1.80929e-07	1.75314e-07	1.70199e-07	1.63759e-07	1.60915e-07	2.388e-07	0	0	0	0	0	0	0	0	0		Maldives	6.59546e-07	6.39078e-07	6.20433e-07	5.96957e-07
Mali	19	20	23	29	31	34	55	50	45	45	35	55	50	70	80	5.614	2.83249	0.357751	0.00288849	0.0856586	0.147578		0.0003	0.236426	0.236426	0.594176		Mali	2.16733e-06	2.2106e-06	2.46802e-06	2.99411e-06	3.145e-06	3.4126e-06	5.82363e-06	5.24763e-06	4.76385e-06	4.777e-06	3.58955e-06	5.39527e-06	4.67535e-06	6.72448e-06	7.81671e-06		Mali	5.44685e-06	5.5556e-06	6.20254e-06	7.52468e-06
Malta	34	37	40	44	38	37	20	20	20	30	40	50	50	35	45	1.06	0.534813	0	0.03				0.0003	0.0303	0.0303	0.0303		Malta	4.97048e-07	5.24119e-07	5.50084e-07	5.82197e-07	4.94073e-07	4.75944e-07	2.714e-07	2.69012e-07	2.71346e-07	4.08143e-07	5.25751e-07	6.28592e-07	5.99187e-07	4.30901e-07	5.63501e-07		Malta	4.97048e-07	5.24119e-07	5.50084e-07	5.82197e-07
Morocco	1105	1124	1176	1227	1314	1432	1520	1615	1715	1755	1850	2040	2400	2565	2830	2.23	1.12513	0.345434	0.03	0.01	0.015		0.0003	0.0553	0.0553	0.400734		Morocco	2.94825e-05	2.90588e-05	2.95161e-05	2.96309e-05	3.11807e-05	3.36186e-05	3.76449e-05	3.96457e-05	4.24659e-05	4.35763e-05	4.43787e-05	4.68071e-05	5.24912e-05	5.7634e-05	6.46772e-05		Morocco	0.000213646	0.000210575	0.000213889	0.000214721
Marshall Islands	0	0	0	0	0	0	0	0	0	0	0	0	0	0	0	2.919	1.47275	0.0199	0.00075				0.0003	0.00105	0.00105	0.02095		Marshall Islands	0	0	0	0	0	0	0	0	0	0	0	0	0	0	0		Marshall Islands	0	0	0	0
Mauritania	11	14	14	14	17	20	0	5	5	10	5	0	0	5	0	4.697	2.36983	0.356592	0.00075	0.012	0.058		0.0003	0.07105	0.07105	0.427642		Mauritania	3.7708e-07	4.65026e-07	4.51459e-07	4.34377e-07	5.18296e-07	6.03262e-07	0	1.577e-07	1.59069e-07	3.19016e-07	1.54103e-07	0	0	1.44345e-07	0		Mauritania	2.2696e-06	2.79894e-06	2.71728e-06	2.61447e-06
Mauritius	84	84	85	85	80	82	80	90	65	90	110	110	120	130	130	1.39	0.701312	0.238313	0.0358908	0	0.0124892	0.00608871	0.0003	0.0547687	0.0587758	0.293081		Mauritius	2.38207e-06	2.30815e-06	2.26748e-06	2.18169e-06	2.01768e-06	2.04609e-06	2.10584e-06	2.34822e-06	1.71066e-06	2.37514e-06	2.80459e-06	2.68255e-06	2.78952e-06	3.10462e-06	3.15778e-06		Mauritius	1.1878e-05	1.15094e-05	1.13066e-05	1.08788e-05
Mexico	873	931	1004	1077	1350	1275	1370	1475	1605	1750	1785	1965	2205	2340	2400	1.91	0.963673	0	0.00175	0.000505	0.00277		0.0003	0.005325	0.005325	0.005325		Mexico	2.2429e-06	2.31769e-06	2.4265e-06	2.50444e-06	3.08474e-06	2.88232e-06	3.26721e-06	3.48666e-06	3.82689e-06	4.18414e-06	4.12321e-06	4.34148e-06	4.64385e-06	5.06293e-06	5.28166e-06		Mexico	2.2429e-06	2.31769e-06	2.4265e-06	2.50444e-06
Micronesia, Federated States of	0	0	0	0	0	0	0	0	0	0	0	0	0	0	0	2.748	1.38648	0.0199	0.00075				0.0003	0.00105	0.00105	0.02095		Micronesia, Federated States of	0	0	0	0	0	0	0	0	0	0	0	0	0	0	0		Micronesia, Federated States of	0	0	0	0
Moldova, Republic of	782	788	770	747	824	874	980	1135	1275	1515	1600	2110	2405	2245	2060	1.731	0.87336	0	0.001				0.0003	0.0013	0.0013	0.0013		Moldova, Republic of	4.90486e-07	4.78911e-07	4.54319e-07	4.24071e-07	4.59658e-07	4.82355e-07	5.70567e-07	6.54995e-07	7.42172e-07	8.84309e-07	9.02279e-07	1.1381e-06	1.23654e-06	1.18584e-06	1.10675e-06		Moldova, Republic of	4.90486e-07	4.78911e-07	4.54319e-07	4.24071e-07
Monaco	1	1	1	0	0	0	0	0	0	0	0	0	0	0	0	2.11	1.06458	0	0.001				0.0003	0.0013	0.0013	0.0013		Monaco	6.2722e-10	6.07755e-10	5.90024e-10	0	0	0	0	0	0	0	0	0	0	0	0		Monaco	6.2722e-10	6.07755e-10	5.90024e-10	0
Mongolia	336	359	373	375	383	399	420	430	445	460	455	465	515	565	570	2.7	1.36226	0	0.00075				0.0003	0.00105	0.00105	0.00105		Mongolia	1.70218e-07	1.76226e-07	1.77756e-07	1.71947e-07	1.72565e-07	1.77858e-07	1.97504e-07	2.00427e-07	2.09219e-07	2.16868e-07	2.07242e-07	2.02581e-07	2.13868e-07	2.41048e-07	2.47345e-07		Mongolia	1.70218e-07	1.76226e-07	1.77756e-07	1.71947e-07
Montenegro (from June 3, 2006)	429	489	536	569	611	643	620	665	705	765	805	835	880	895	890	1.74	0.877901	0.0198911	0.0025				0.0003	0.0028	0.0028	0.0226911		Montenegro (from June 3, 2006)	5.79552e-07	6.40107e-07	6.8116e-07	6.95737e-07	7.34115e-07	7.6433e-07	7.77475e-07	8.26567e-07	8.8389e-07	9.61762e-07	9.77758e-07	9.70064e-07	9.74519e-07	1.01823e-06	1.02988e-06		Montenegro (from June 3, 2006)	4.69666e-06	5.1874e-06	5.52009e-06	5.63822e-06
Mozambique	128	135	147	155	163	166	175	165	165	155	150	165	165	165	145	4.763	2.40313	0.359659	0.026		0.028		0.0003	0.0543	0.0543	0.413959		Mozambique	3.35341e-06	3.42704e-06	3.62279e-06	3.67541e-06	3.79798e-06	3.82666e-06	4.25574e-06	3.97724e-06	4.01176e-06	3.77902e-06	3.5332e-06	3.7174e-06	3.54351e-06	3.64041e-06	3.25393e-06		Mozambique	2.55649e-05	2.61262e-05	2.76186e-05	2.80197e-05
Myanmar	65	70	75	80	84	85	85	95	85	130	145	150	190	230	280	2.115	1.0671	0.368154	0.0224217	0	0	0.24896	0.0003	0.271681	0.273608	0.639835		Myanmar	8.58063e-06	8.95391e-06	9.31358e-06	9.55859e-06	9.86218e-06	9.87324e-06	1.04156e-05	1.15385e-05	1.04136e-05	1.59706e-05	1.72098e-05	1.70285e-05	2.05604e-05	2.55696e-05	3.16612e-05		Myanmar	2.00659e-05	2.09388e-05	2.17799e-05	2.23528e-05
Namibia	34	34	37	42	44	44	15	20	25	25	20	30	40	50	80	3.212	1.62059	0.125451	0.00075		0.02		0.0003	0.02105	0.02105	0.146501		Namibia	3.45309e-07	3.34593e-07	3.53492e-07	3.86079e-07	3.97438e-07	3.93203e-07	1.4141e-07	1.86888e-07	2.35637e-07	2.36287e-07	1.82625e-07	2.62017e-07	3.33013e-07	4.2765e-07	6.95956e-07		Namibia	2.40324e-06	2.32866e-06	2.4602e-06	2.68699e-06
Nauru	0	0	0	0	0	0	0	0	0	0	0	0	0	0	0	3.331	1.68063	0.0199	0.00075				0.0003	0.00105	0.00105	0.02095		Nauru	0	0	0	0	0	0	0	0	0	0	0	0	0	0	0		Nauru	0	0	0	0
Nepal	161	170	205	229	299	337	385	440	495	520	545	590	635	715	725	1.984	1.00101	0.95976	0.01			0.03	0.0003	0.0403	0.0403	1.00006		Nepal	3.13046e-06	3.20287e-06	3.7496e-06	4.03009e-06	5.1706e-06	5.76563e-06	6.94869e-06	7.87148e-06	8.93226e-06	9.40928e-06	9.5275e-06	9.86536e-06	1.01211e-05	1.17079e-05	1.20749e-05		Nepal	7.76835e-05	7.94805e-05	9.30478e-05	0.000100008
New Zealand	106	112	136	140	136	147	155	120	120	140	135	140	150	145	165	1.56	0.787084	0.0295468	0.00293314	6.0606e-05	0.000801643	0.00226583	0.0003	0.00636123	0.00840607	0.035908		New Zealand	4.29908e-07	4.40146e-07	5.1887e-07	5.13921e-07	4.90565e-07	5.24593e-07	5.83528e-07	4.47789e-07	4.51674e-07	5.28408e-07	4.92271e-07	4.88289e-07	4.98694e-07	4.95254e-07	5.73214e-07		New Zealand	1.83643e-06	1.88016e-06	2.21645e-06	2.1953e-06
Nicaragua	30	34	33	39	41	40	30	25	30	40	40	45	60	65	55	2.218	1.11907	0.0215783	0.0012	0.0024	0.0096		0.0003	0.0135	0.0135	0.0350783		Nicaragua	1.95403e-07	2.14584e-07	2.02197e-07	2.29918e-07	2.3751e-07	2.29248e-07	1.81381e-07	1.49821e-07	1.81345e-07	2.42461e-07	2.34246e-07	2.52059e-07	3.20357e-07	3.56544e-07	3.06857e-07		Nicaragua	5.07735e-07	5.57575e-07	5.25387e-07	5.97418e-07
Netherlands	1770	1800	1825	1936	1996	2044	2080	2015	2030	1955	1975	1955	1940	1940	1940	1.43	0.721493	0.0487157	0.0041392	0.000931847	0.00462822	0.00071827	0.0003	0.0107175	0.0107865	0.0594332		Netherlands	9.21154e-06	9.07695e-06	8.93452e-06	9.11931e-06	9.23863e-06	9.35998e-06	1.00481e-05	9.64841e-06	9.80458e-06	9.46841e-06	9.24117e-06	8.74953e-06	8.27625e-06	8.50257e-06	8.64816e-06		Netherlands	5.07551e-05	5.00135e-05	4.92287e-05	5.02469e-05
Niger	7	10	9	11	11	11	0	0	0	0	0	0	0	0	5	6.061	3.05802	0.403328	0.022	0.06	0.201		0.0003	0.2833	0.2833	0.686628		Niger	9.56801e-07	1.32444e-06	1.15722e-06	1.36086e-06	1.33722e-06	1.32297e-06	0	0	0	0	0	0	0	0	5.85405e-07		Niger	2.31898e-06	3.21001e-06	2.80472e-06	3.29829e-06
Nigeria	743	837	998	1301	1777	2424	3550	4235	4950	4980	4870	4740	4680	4365	4215	4.482	2.26135	0.501203	0.005	0.045	0.244		0.0003	0.2943	0.2943	0.795503		Nigeria	0.000105501	0.00011516	0.000133305	0.000167202	0.00022441	0.000302855	0.000467903	0.000553276	0.000652298	0.000658064	0.000621723	0.000578795	0.000544736	0.000521964	0.000512658		Nigeria	0.000285172	0.000311281	0.000360329	0.000451954
North Macedonia	2631	2688	2919	3163	3504	3802	4035	4390	4800	5360	5770	6295	6855	7405	7505	1.5	0.756811	0.120104	0.02				0.0003	0.0203	0.0203	0.140404		North Macedonia	2.57688e-05	2.551e-05	2.68941e-05	2.80395e-05	3.05228e-05	3.27657e-05	3.6684e-05	3.95603e-05	4.36303e-05	4.8855e-05	5.081e-05	5.3021e-05	5.50368e-05	6.10784e-05	6.29632e-05		North Macedonia	0.000178228	0.000176438	0.000186011	0.000193933
Norway	284	294	298	310	330	340	340	315	310	300	305	310	320	305	310	1.4	0.706357		0.00214691	8.30108e-05	0.000800059	0.000814528	0.0003	0.00414451	0.00439937	0.00414451		Norway	6.02818e-07	6.04677e-07	5.95022e-07	5.95562e-07	6.22973e-07	6.35011e-07	6.69895e-07	6.15177e-07	6.10665e-07	5.92598e-07	5.82061e-07	5.65859e-07	5.56789e-07	5.45202e-07	5.63628e-07		Norway	5.67896e-07	5.69647e-07	5.60552e-07	5.61061e-07
Oman	20	12	17	23	43	50	45	15	20	25	10	15	10	10	10	2.525	1.27397	0.887369	0.0329798	0	0.0798317	0	0.0003	0.113111	0.113111	1.00048		Oman	1.09147e-06	6.34561e-07	8.72734e-07	1.13608e-06	2.08708e-06	2.40098e-06	2.27959e-06	7.53176e-07	1.01295e-06	1.26968e-06	4.90664e-07	7.0397e-07	4.47359e-07	4.59593e-07	4.67462e-07		Oman	9.65418e-06	5.61275e-06	7.71941e-06	1.00487e-05
Austria	19475	19445	19226	19382	19374	19294	19205	18550	18640	17900	17760	17740	17420	17155	16865	1.32	0.665994	0.00286129	0.00173354	4.39805e-05	0.000452966	1.18058e-05	0.0003	0.00254229	0.00260329	0.00540357		Austria	2.44612e-05	2.36655e-05	2.27163e-05	2.20342e-05	2.16425e-05	2.13234e-05	2.2391e-05	2.14371e-05	2.1728e-05	2.0923e-05	2.0056e-05	1.91616e-05	1.79358e-05	1.8146e-05	1.81447e-05		Austria	5.07733e-05	4.91218e-05	4.71516e-05	4.57356e-05
Pakistan	630	653	732	833	919	1048	1215	1345	1480	1570	1660	1895	2165	2555	2905	3.605	1.81887	0.151539	0.0455839	0	0.0018	0.0018	0.0003	0.0494839	0.0494839	0.201023		Pakistan	1.50412e-05	1.51065e-05	1.644e-05	1.80005e-05	1.95139e-05	2.2016e-05	2.69264e-05	2.95451e-05	3.27927e-05	3.48829e-05	3.56328e-05	3.89072e-05	4.23713e-05	5.13714e-05	5.94087e-05		Pakistan	6.11031e-05	6.13684e-05	6.67857e-05	7.3125e-05
Palestinian Territories	0	0	0	33	48	59	100	145	160	175	200	220	220	200	195	3.311	1.67053	0.0294426	0.03		0.005		0.0003	0.0353	0.0353	0.0647426		Palestinian Territories	0	0	0	5.08702e-07	7.27077e-07	8.84176e-07	1.58093e-06	2.27217e-06	2.52898e-06	2.77371e-06	3.06254e-06	3.22221e-06	3.07148e-06	2.86861e-06	2.84478e-06		Palestinian Territories	0	0	0	9.32993e-07
Palau	0	0	0	0	0	0	0	0	0	0	0	0	0	0	0	1.907	0.962159	0.0199	0.00075				0.0003	0.00105	0.00105	0.02095		Palau	0	0	0	0	0	0	0	0	0	0	0	0	0	0	0		Palau	0	0	0	0
Panama	32	35	33	41	42	43	30	45	35	45	35	30	40	65	75	2.119	1.06912	0.0502036	0.0015	0.003	0.0225		0.0003	0.0273	0.0273	0.0775036		Panama	4.21492e-07	4.467e-07	4.08887e-07	4.88789e-07	4.92013e-07	4.9836e-07	3.66793e-07	5.45348e-07	4.2784e-07	5.51599e-07	4.14484e-07	3.39813e-07	4.31889e-07	7.21012e-07	8.46182e-07		Panama	1.1966e-06	1.26816e-06	1.16081e-06	1.38765e-06
Papua New Guinea	6	8	9	7	6	6	0	0	0	0	0	0	0	0	0	3.099	1.56357	0.9639	0.035				0.0003	0.0353	0.0353	0.9992		Papua New Guinea	1.02189e-07	1.32023e-07	1.44193e-07	1.07906e-07	9.08847e-08	8.99162e-08	0	0	0	0	0	0	0	0	0		Papua New Guinea	2.89255e-06	3.73704e-06	4.08151e-06	3.05439e-06
Paraguay	94	92	94	95	94	97	95	95	90	100	100	110	115	125	135	2.422	1.222	0.021879	0.00075				0.0003	0.00105	0.00105	0.022929		Paraguay	4.76205e-08	4.51609e-08	4.47964e-08	4.356e-08	4.23528e-08	4.32387e-08	4.46735e-08	4.42804e-08	4.23139e-08	4.71452e-08	4.55477e-08	4.79223e-08	4.7757e-08	5.33293e-08	5.85818e-08		Paraguay	1.0399e-06	9.86185e-07	9.78226e-07	9.51225e-07
Peru	1120	1094	1117	1085	1091	1076	1095	1060	1120	1130	1130	1180	1280	1415	1495	1.98	0.998991	0.0198733	0.00075		0.01		0.0003	0.01105	0.01105	0.0309233		Peru	5.97114e-06	5.65152e-06	5.60198e-06	5.2356e-06	5.17311e-06	5.04762e-06	5.41893e-06	5.19956e-06	5.54155e-06	5.60646e-06	5.41649e-06	5.41004e-06	5.59399e-06	6.35309e-06	6.82721e-06		Peru	1.67101e-05	1.58157e-05	1.56771e-05	1.46518e-05
Philippines	2309	2314	2357	2409	2487	2578	2680	2605	2770	2925	3080	3440	3860	4335	4735	1.916	0.9667	0.215104	0.01			0.01	0.0003	0.0203	0.039488	0.235404		Philippines	4.39912e-05	4.27183e-05	4.22426e-05	4.1541e-05	4.21411e-05	4.32175e-05	4.73955e-05	4.56637e-05	4.89774e-05	5.18608e-05	5.27586e-05	5.63611e-05	6.0284e-05	6.95538e-05	7.72725e-05		Philippines	0.000262249	0.000254661	0.000251826	0.000247643
Poland	19467	21049	23288	26863	29724	32176	33370	33605	34055	33840	33595	33470	33580	33385	31735	1.158	0.584258	0	0.001				0.0003	0.0013	0.0013	0.0013		Poland	1.22101e-05	1.27926e-05	1.37405e-05	1.52501e-05	1.65812e-05	1.77577e-05	1.94284e-05	1.9393e-05	1.98233e-05	1.97525e-05	1.8945e-05	1.80532e-05	1.72653e-05	1.76344e-05	1.70499e-05		Poland	1.22101e-05	1.27926e-05	1.37405e-05	1.52501e-05
Portugal	2263	2351	2518	2821	3071	3154	3165	3155	3225	3170	3155	3290	3320	3375	3480	1.44	0.726539	0.00872703	0.0141976	6.77491e-05	0.00782135	2.43705e-05	0.000288389	0.0223994	0.0224303	0.0311265		Portugal	2.44904e-05	2.46532e-05	2.5634e-05	2.7632e-05	2.95583e-05	3.00336e-05	3.1794e-05	3.14147e-05	3.23903e-05	3.19258e-05	3.06981e-05	3.06187e-05	2.94525e-05	3.07592e-05	3.22592e-05		Portugal	3.39853e-05	3.42112e-05	3.55723e-05	3.83449e-05
Rwanda	40	39	34	35	38	36	15	20	20	25	25	25	55	65	90	3.698	1.86579	0.4071	0.00075		0.04		0.0003	0.04105	0.04105	0.44815		Rwanda	7.92228e-07	7.48451e-07	6.33459e-07	6.27416e-07	6.69363e-07	6.27375e-07	2.75766e-07	3.64453e-07	3.67616e-07	4.60788e-07	4.45175e-07	4.25804e-07	8.92947e-07	1.08416e-06	1.52685e-06		Rwanda	8.64889e-06	8.17097e-06	6.91558e-06	6.84961e-06
Romania	15502	18301	22324	27629	33817	40223	45030	49115	53020	55365	57225	59025	60675	61055	60070	1.71	0.862765	0.097405	0.01				0.0003	0.0103	0.0103	0.107705		Romania	7.70374e-05	8.81247e-05	0.00010436	0.000124273	0.000149464	0.000175883	0.000207719	0.000224569	0.000244528	0.000256048	0.000255682	0.000252249	0.000247171	0.00025552	0.000255702		Romania	0.000805565	0.000921502	0.00109128	0.0012995
Russian Federation	12791	13277	13878	14833	15248	15851	16450	16595	17165	17780	17900	18315	19715	20380	18940	1.41	0.711403	0	0.001				0.0003	0.0013	0.0013	0.0013		Russian Federation	8.02278e-06	8.06917e-06	8.18835e-06	8.42068e-06	8.50591e-06	8.74806e-06	9.57737e-06	9.57677e-06	9.99167e-06	1.03782e-05	1.00942e-05	9.87885e-06	1.01365e-05	1.0765e-05	1.01757e-05		Russian Federation	8.02278e-06	8.06917e-06	8.18835e-06	8.42068e-06
Solomon Islands	0	0	0	1	0	0	0	0	0	0	0	0	0	0	0	3.557	1.79465	0.351975	0.00075				0.0003	0.00105	0.00105	0.353025		Solomon Islands	0	0	0	4.58526e-10	0	0	0	0	0	0	0	0	0	0	0		Solomon Islands	0	0	0	1.54163e-07
Zambia	15	18	23	28	37	37	30	30	25	40	50	50	65	75	70	4.101	2.06912	0.406157	0.0015	0.006	0.176		0.0003	0.1838	0.1838	0.589957		Zambia	1.33019e-06	1.54669e-06	1.91867e-06	2.24739e-06	2.91818e-06	2.88708e-06	2.46947e-06	2.44774e-06	2.05748e-06	3.30106e-06	3.98651e-06	3.81304e-06	4.72507e-06	5.6011e-06	5.3172e-06		Zambia	4.26961e-06	4.96453e-06	6.15849e-06	7.21362e-06
Samoa	5	3	3	3	3	3	0	0	0	0	0	0	0	0	0	3.829	1.93189	0.1664	0.00075				0.0003	0.00105	0.00105	0.16745		Samoa	2.53301e-09	1.47264e-09	1.42967e-09	1.37558e-09	1.35168e-09	1.33728e-09	0	0	0	0	0	0	0	0	0		Samoa	4.03954e-07	2.34851e-07	2.27999e-07	2.19372e-07
San Marino	0	0	0	0	0	0	0	0	0	0	0	0	0	0	0	1.149	0.579717	0	0.001				0.0003	0.0013	0.0013	0.0013		San Marino	0	0	0	0	0	0	0	0	0	0	0	0	0	0	0		San Marino	0	0	0	0
Sao Tome and Principe	1	1	1	1	1	1	0	0	0	0	0	0	0	0	0	3.644	1.83855	0.6864	0.00075	0.021	0.18		0.0003	0.20205	0.20205	0.88845		Sao Tome and Principe	9.74845e-08	9.44592e-08	9.17034e-08	8.82335e-08	8.67009e-08	8.5777e-08	0	0	0	0	0	0	0	0	0		Sao Tome and Principe	4.28657e-07	4.15354e-07	4.03236e-07	3.87979e-07
Saudi Arabia	52	76	86	131	197	275	305	245	220	210	195	185	140	140	140	2.28	1.15035	0.460611	0.067445	0	0.0986605	0	0.0003	0.166406	0.166406	0.627016		Saudi Arabia	4.17492e-06	5.91244e-06	6.4952e-06	9.51949e-06	1.40669e-05	1.94273e-05	2.27303e-05	1.80981e-05	1.63924e-05	1.56904e-05	1.4076e-05	1.27731e-05	9.21395e-06	9.46591e-06	9.62799e-06		Saudi Arabia	1.57311e-05	2.22781e-05	2.44739e-05	3.58695e-05
Sweden	935	971	974	1050	1102	1124	1140	1035	1045	1015	1030	1060	1095	1135	1180	1.45	0.731584		0.00282157	0.00010914	0.00119547	0.000817622	0.0003	0.00524381	0.00554404	0.00524381		Sweden	2.501e-06	2.5167e-06	2.45082e-06	2.54208e-06	2.62164e-06	2.64548e-06	2.83053e-06	2.54721e-06	2.59414e-06	2.52662e-06	2.47708e-06	2.4383e-06	2.40099e-06	2.55675e-06	2.70363e-06		Sweden	2.36557e-06	2.38041e-06	2.3181e-06	2.40442e-06
Switzerland	1699	1716	1709	1700	1716	1696	1665	1610	1620	1605	1590	1660	1600	1615	1510	1.33	0.671039	0.0260508	0.00372122	0.000178243	0.00133222	0.000777803	0.0003	0.00630949	0.00662596	0.0323603		Switzerland	5.43149e-06	5.31559e-06	5.13946e-06	4.91895e-06	4.879e-06	4.77075e-06	4.94083e-06	4.73558e-06	4.80634e-06	4.77499e-06	4.57008e-06	4.56366e-06	4.19294e-06	4.34798e-06	4.13491e-06		Switzerland	2.65267e-05	2.59606e-05	2.51004e-05	2.40235e-05
Senegal	129	133	151	168	188	237	295	260	290	280	310	325	350	365	365	3.818	1.92634	0.206852	0.004	0.017	0.127		0.0003	0.1483	0.1483	0.355152		Senegal	9.23013e-06	9.22101e-06	1.01635e-05	1.08799e-05	1.19637e-05	1.49211e-05	1.9593e-05	1.71164e-05	1.92571e-05	1.86444e-05	1.99425e-05	1.99977e-05	2.05286e-05	2.19938e-05	2.23704e-05		Senegal	2.21045e-05	2.20827e-05	2.43399e-05	2.60555e-05
Serbia	3814	4563	5198	5543	6031	6299	6705	7180	7775	8450	9125	10080	10735	11255	11615	1.61	0.812311	0.0198911	0.0025				0.0003	0.0028	0.0028	0.0226911		Serbia	5.15247e-06	5.97302e-06	6.60573e-06	6.77763e-06	7.24623e-06	7.48758e-06	8.40802e-06	8.92444e-06	9.74786e-06	1.06234e-05	1.10833e-05	1.17105e-05	1.1888e-05	1.28047e-05	1.34406e-05		Serbia	4.17554e-05	4.84051e-05	5.35326e-05	5.49256e-05
Serbia (including Kosovo) (June 3, 2006-February 16, 2008)	4730	4073	3481	3415	3389	3368	3350	3240	3135	3070	2935	2600	2370	2060	1750	1.61	0.812311	0.0198911	0.0025				0.0003	0.0028	0.0028	0.0226911		Serbia (including Kosovo) (June 3, 2006-February 16, 2008)	6.38993e-06	5.3316e-06	4.42373e-06	4.17564e-06	4.07187e-06	4.00352e-06	4.20088e-06	4.02718e-06	3.93049e-06	3.85962e-06	3.56487e-06	3.02056e-06	2.62456e-06	2.34364e-06	2.02505e-06		Serbia (including Kosovo) (June 3, 2006-February 16, 2008)	5.17837e-05	4.32071e-05	3.58497e-05	3.38393e-05
Serbia and Montenegro (February 5, 2003-June 2, 2006)	5440	4351	3368	3115	2900	2719	2585	2460	2310	2175	1985	1705	1495	1270	1085	1.61	0.812311	0.0198911	0.0025				0.0003	0.0028	0.0028	0.0226911		Serbia and Montenegro (February 5, 2003-June 2, 2006)	7.34909e-06	5.69551e-06	4.28013e-06	3.80882e-06	3.48434e-06	3.23206e-06	3.24157e-06	3.05768e-06	2.89615e-06	2.73442e-06	2.41099e-06	1.98079e-06	1.65558e-06	1.44487e-06	1.25553e-06		Serbia and Montenegro (February 5, 2003-June 2, 2006)	5.95568e-05	4.61562e-05	3.4686e-05	3.08666e-05
Seychelles	21	22	23	20	21	21	5	5	5	5	5	5	0	0	0	2.02	1.01917	0.19	0.00075		0.006		0.0003	0.00705	0.00705	0.19705		Seychelles	7.14308e-08	7.25099e-08	7.35942e-08	6.15735e-08	6.35292e-08	6.28522e-08	1.57869e-08	1.5648e-08	1.57837e-08	1.58273e-08	1.5291e-08	1.46257e-08	0	0	0		Seychelles	1.99652e-06	2.02668e-06	2.05698e-06	1.721e-06
Sierra Leone	87	85	101	128	150	194	285	390	415	430	455	465	505	670	740	3.791	1.91271	0.406157	0.00075	0.028	0.225		0.0003	0.25405	0.25405	0.660207		Sierra Leone	1.06639e-05	1.00954e-05	1.16457e-05	1.42005e-05	1.63522e-05	2.09234e-05	3.24266e-05	4.39827e-05	4.72083e-05	4.90496e-05	5.01428e-05	4.90149e-05	5.07412e-05	6.91609e-05	7.76946e-05		Sierra Leone	2.77125e-05	2.62352e-05	3.02641e-05	3.69033e-05
Zimbabwe	56	53	53	57	54	69	75	90	140	180	170	175	215	265	305	3.724	1.87891	0.351975	0.0015	0	0.014		0.0003	0.0158	0.0158	0.367775		Zimbabwe	4.26896e-07	3.91488e-07	3.80066e-07	3.93284e-07	3.66113e-07	4.62826e-07	5.30708e-07	6.31245e-07	9.90458e-07	1.27696e-06	1.16515e-06	1.14723e-06	1.34352e-06	1.70125e-06	1.99158e-06		Zimbabwe	9.93681e-06	9.11263e-06	8.84676e-06	9.15444e-06
Singapore	168	173	179	191	206	236	235	235	260	285	280	295	305	320	340	0.97	0.489405	0.160334	0.03				0.0003	0.0303	0.063179	0.190634		Singapore	5.12105e-06	5.10981e-06	5.13277e-06	5.26964e-06	5.58476e-06	6.3299e-06	6.64932e-06	6.59081e-06	7.35524e-06	8.08474e-06	7.67376e-06	7.73305e-06	7.62118e-06	8.21465e-06	8.87752e-06		Singapore	1.54521e-05	1.54181e-05	1.54874e-05	1.59004e-05
Slovakia	4717	5312	5982	6932	7391	7955	8170	8140	8270	8315	8125	8225	8255	8115	7675	1.49	0.751766	0	0.001				0.0003	0.0013	0.0013	0.0013		Slovakia	2.9586e-06	3.2284e-06	3.52952e-06	3.93529e-06	4.12298e-06	4.39031e-06	4.75666e-06	4.69749e-06	4.81393e-06	4.85349e-06	4.58189e-06	4.43645e-06	4.24434e-06	4.28646e-06	4.12346e-06		Slovakia	2.9586e-06	3.2284e-06	3.52952e-06	3.93529e-06
Slovenia	1283	1313	1383	1602	1781	1967	2090	2105	2190	2165	2165	2120	2115	2075	1985	1.51	0.761857	0	0.001				0.0003	0.0013	0.0013	0.0013		Slovenia	8.04724e-07	7.97983e-07	8.16003e-07	9.09454e-07	9.93509e-07	1.08557e-06	1.21682e-06	1.21477e-06	1.27479e-06	1.26372e-06	1.2209e-06	1.1435e-06	1.08744e-06	1.09604e-06	1.06646e-06		Slovenia	8.04724e-07	7.97983e-07	8.16003e-07	9.09454e-07
Somalia	418	394	421	486	737	1010	1525	1680	1820	1935	1965	2155	2290	2560	2995	6.132	3.09384	0.0198931	0.005		0.001		0.0003	0.0063	0.0063	0.0261931		Somalia	1.27056e-06	1.16044e-06	1.20379e-06	1.33706e-06	1.99238e-06	2.70131e-06	4.30276e-06	4.69838e-06	5.13408e-06	5.47356e-06	5.37008e-06	5.63305e-06	5.70592e-06	6.5531e-06	7.79789e-06		Somalia	5.2825e-06	4.82468e-06	5.00489e-06	5.55901e-06
Soviet Union (until 25.12.1991)	116	97	85	78	73	59	35	25	20	25	5	5	0	0	0	n.a.												Soviet Union (until 25.12.1991)																	Soviet Union (until 25.12.1991)
Spain	4006	4409	5031	6524	7256	7715	7960	7715	7725	7755	7995	8465	8745	9030	9320	1.12	0.565086	0.00723017	0.00262202	0.000374818	0.00108027	2.03522e-05	0.000290737	0.0043882	0.00445605	0.0116184		Spain	8.61266e-06	9.18492e-06	1.01749e-05	1.26952e-05	1.38743e-05	1.45948e-05	1.58855e-05	1.5261e-05	1.54134e-05	1.5516e-05	1.54542e-05	1.56507e-05	1.5412e-05	1.63495e-05	1.71635e-05		Spain	2.2456e-05	2.39481e-05	2.65293e-05	3.31004e-05
Sri Lanka	749	720	709	701	707	712	680	630	610	630	590	590	620	640	635	1.974	0.995964	0.494006	0.025			0.025	0.0003	0.0503	0.0503	0.544306		Sri Lanka	1.81772e-05	1.69311e-05	1.6186e-05	1.53979e-05	1.52599e-05	1.52041e-05	1.53184e-05	1.40672e-05	1.37388e-05	1.42284e-05	1.28735e-05	1.23133e-05	1.23342e-05	1.30802e-05	1.32002e-05		Sri Lanka	0.000196699	0.000183215	0.000175152	0.000166623
St. Kitts and Nevis	0	0	0	0	0	1	0	0	0	0	0	0	0	0	0	1.505	0.759334	0.23315	0.01	0.04	0.11		0.0003	0.1603	0.1603	0.39345		St. Kitts and Nevis	0	0	0	0	0	6.80527e-08	0	0	0	0	0	0	0	0	0		St. Kitts and Nevis	0	0	0	0
St. Lucia	3	3	3	5	6	5	0	0	0	0	0	0	0	0	0	1.379	0.695762	0.213231	0.01	0.03	0.1		0.0003	0.1403	0.1403	0.353531		St. Lucia	2.03075e-07	1.96773e-07	1.91032e-07	3.06339e-07	3.61222e-07	2.9781e-07	0	0	0	0	0	0	0	0	0		St. Lucia	5.11712e-07	4.95832e-07	4.81366e-07	7.7192e-07
St. Vincent and the Grenadines	0	0	1	1	3	2	0	0	0	0	0	0	0	0	0	1.775	0.89556	0.147776	0.03	0.03	0.068		0.0003	0.1283	0.1283	0.276076		St. Vincent and the Grenadines	0	0	5.82308e-08	5.60275e-08	1.65163e-07	1.08935e-07	0	0	0	0	0	0	0	0	0		St. Vincent and the Grenadines	0	0	1.25301e-07	1.2056e-07
Stateless	302	299	302	279	326	491	630	730	825	835	855	935	975	930	890	n.a.												Stateless																	Stateless
South Africa	352	367	387	399	401	418	440	465	500	555	560	605	640	720	715	2.216	1.11806	0.125484	0.0015	0.001	0.003		0.0003	0.0058	0.0058	0.131284		South Africa	9.85026e-07	9.95129e-07	1.01874e-06	1.01059e-06	9.98015e-07	1.02924e-06	1.14292e-06	1.19724e-06	1.29852e-06	1.44534e-06	1.40894e-06	1.45593e-06	1.46811e-06	1.69679e-06	1.71385e-06		South Africa	2.22962e-05	2.25249e-05	2.30594e-05	2.28749e-05
Sudan (including South Sudan) (until July 8, 2011)	102	96	72	62	52	42	35	30	20	15	15	5	0	5	0	4.323	2.18113	0.344047	0.039	0.001	0.021		0.0003	0.0613	0.0613	0.405347		Sudan (including South Sudan) (until July 8, 2011)	3.01674e-06	2.75117e-06	2.00318e-06	1.65969e-06	1.36782e-06	1.093e-06	9.60872e-07	8.16357e-07	5.48961e-07	4.12857e-07	3.98868e-07	1.27171e-07	0	1.24537e-07	0		Sudan (including South Sudan) (until July 8, 2011)	1.99482e-05	1.81922e-05	1.3246e-05	1.09747e-05
Sudan (excluding South Sudan) (from July 9, 2011)	0	6	32	48	63	80	85	110	120	160	150	180	200	235	285	4.323	2.18113	0.344047	0.039	0.001	0.021		0.0003	0.0613	0.0613	0.405347		Sudan (excluding South Sudan) (from July 9, 2011)	0	1.71948e-07	8.90301e-07	1.28492e-06	1.65716e-06	2.08191e-06	2.33355e-06	2.99331e-06	3.29377e-06	4.40381e-06	3.98868e-06	4.57814e-06	4.84887e-06	5.85322e-06	7.22013e-06		Sudan (excluding South Sudan) (from July 9, 2011)	0	1.13701e-06	5.88713e-06	8.49656e-06
South Sudan (from July 9, 2011)	0	0	4	3	3	8	0	0	0	5	5	10	15	25	40	3.864	1.94955	0.344047	0.039	0.001	0.021		0.0003	0.0613	0.0613	0.405347		South Sudan (from July 9, 2011)	0	0	1.11288e-07	8.03076e-08	7.89126e-08	2.08191e-07	0	0	0	1.37619e-07	1.32956e-07	2.54341e-07	3.63665e-07	6.22683e-07	1.01335e-06		South Sudan (from July 9, 2011)	0	0	7.35891e-07	5.31035e-07
Suriname	2	3	1	1	1	1	0	0	0	0	0	0	0	0	0	2.249	1.13471	0.151776	0.01	0.015	0.07		0.0003	0.0953	0.0953	0.247076		Suriname	9.19602e-08	1.33659e-07	4.32533e-08	4.16167e-08	4.08938e-08	4.0458e-08	0	0	0	0	0	0	0	0	0		Suriname	2.38417e-07	3.46527e-07	1.12139e-07	1.07896e-07
Syria	472	510	666	994	2207	6523	11390	13450	14765	15850	16295	17735	18515	19055	19635	2.712	1.36831	0.0294426	0.05		0.01		0.0003	0.0603	0.0603	0.0897426		Syria	1.37321e-05	1.43772e-05	1.82271e-05	2.61745e-05	5.71063e-05	0.000166985	0.000307594	0.000360029	0.000398659	0.000429136	0.000426235	0.000443715	0.000441561	0.000466866	0.000489314		Syria	2.0437e-05	2.13971e-05	2.71268e-05	3.89547e-05
Tajikistan	28	36	36	35	44	46	35	80	100	160	155	245	360	405	475	3.072	1.54995	0.133277	0.05				0.0003	0.0503	0.0503	0.183577		Tajikistan	6.79521e-07	8.46557e-07	8.21858e-07	7.68795e-07	9.49698e-07	9.82285e-07	7.88448e-07	1.78631e-06	2.25226e-06	3.61357e-06	3.38203e-06	5.11317e-06	7.16177e-06	8.27731e-06	9.87419e-06		Tajikistan	2.48001e-06	3.08963e-06	2.99949e-06	2.80583e-06
Taiwan	419	440	498	555	635	670	710	770	885	985	940	980	1090	1215	1290	0.999	0.504036	0.092191	0.02				0.0003	0.0203	0.058676	0.112491		Taiwan	1.18618e-05	1.20698e-05	1.32622e-05	1.42209e-05	1.59882e-05	1.66896e-05	1.86576e-05	2.00562e-05	2.32517e-05	2.59505e-05	2.39258e-05	2.38585e-05	2.52951e-05	2.8967e-05	3.12817e-05		Taiwan	2.2741e-05	2.31396e-05	2.54257e-05	2.72637e-05
Tanzania	88	83	95	109	116	123	145	160	165	230	215	230	285	355	375	4.606	2.32392	0.382019	0.0015	0	0.23		0.0003	0.2318	0.2318	0.613819		Tanzania	9.84176e-06	8.9945e-06	9.99455e-06	1.10335e-05	1.15381e-05	1.2104e-05	1.50528e-05	1.64639e-05	1.71257e-05	2.39381e-05	2.16187e-05	2.21206e-05	2.61281e-05	3.34355e-05	3.5924e-05		Tanzania	2.60615e-05	2.38179e-05	2.64661e-05	2.92174e-05
Thailand	6971	7096	7142	7136	7087	6967	6730	6480	6305	6070	5840	5565	5445	5170	4875	1.212	0.611504	0.655449	0.0495517	0	0	0.208501	0.0003	0.258352	0.283891	0.913802		Thailand	0.000954825	0.000941783	0.000920233	0.00088467	0.000863334	0.000839671	0.000855665	0.00081663	0.000801471	0.000773728	0.000719187	0.0006555	0.000611363	0.00059636	0.000571961		Thailand	0.00307343	0.00303145	0.00296209	0.00284762
Timor-Leste	0	0	0	0	0	0	0	0	0	0	0	0	0	0	0	2.707	1.36579	0.242026	0.03			0.04	0.0003	0.0703	0.0703	0.312326		Timor-Leste	0	0	0	0	0	0	0	0	0	0	0	0	0	0	0		Timor-Leste	0	0	0	0
Togo	869	859	881	900	931	955	965	930	910	930	885	825	795	770	715	4.192	2.11504	0.4071	0.005	0.094	0.186		0.0003	0.2853	0.2853	0.6924		Togo	0.000119619	0.000114573	0.000114079	0.000112129	0.000113977	0.000115669	0.000123301	0.000117783	0.00011625	0.000119133	0.000109527	9.76589e-05	8.97054e-05	8.92604e-05	8.43039e-05		Togo	0.000290304	0.000278058	0.000276859	0.000272129
Tonga	6	7	6	6	6	6	0	0	0	0	0	0	0	0	0	3.129	1.57871	0.1664	0.00075				0.0003	0.00105	0.00105	0.16745		Tonga	3.03961e-09	3.43616e-09	2.85935e-09	2.75116e-09	2.70337e-09	2.67456e-09	0	0	0	0	0	0	0	0	0		Tonga	4.84745e-07	5.47985e-07	4.55998e-07	4.38744e-07
Trinidad and Tobago	27	26	25	23	19	22	0	0	0	0	0	0	0	5	0	1.532	0.772957	0.172628	0.01	0.02	0.08		0.0003	0.1103	0.1103	0.282928		Trinidad and Tobago	1.43687e-06	1.34071e-06	1.25153e-06	1.10784e-06	8.99278e-07	1.03017e-06	0	0	0	0	0	0	0	2.24085e-07	0		Trinidad and Tobago	3.68567e-06	3.43902e-06	3.21027e-06	2.8417e-06
Chad	2	4	4	5	5	6	0	0	0	0	0	0	0	0	0	6.12	3.08779	0.405214	0.009	0.003	0.09		0.0003	0.1023	0.1023	0.507514		Chad	9.87149e-08	1.91303e-07	1.85721e-07	2.23368e-07	2.19488e-07	2.60579e-07	0	0	0	0	0	0	0	0	0		Chad	4.89728e-07	9.49059e-07	9.2137e-07	1.10813e-06
Czechia	7307	7593	7989	8614	8940	9363	9420	9430	9540	9410	9325	9165	8970	8755	8275	1.45	0.731584	0	0.001				0.0003	0.0013	0.0013	0.0013		Czechia	4.5831e-06	4.61469e-06	4.7137e-06	4.89016e-06	4.98707e-06	5.16738e-06	5.48443e-06	5.44194e-06	5.55319e-06	5.49264e-06	5.2586e-06	4.94347e-06	4.61196e-06	4.62451e-06	4.44581e-06		Czechia	4.5831e-06	4.61469e-06	4.7137e-06	4.89016e-06
Czechoslovakia (until December 31, 1992)	329	302	286	230	208	194	175	145	120	110	90	75	65	55	25	n.a.												Czechoslovakia (until December 31, 1992)																	Czechoslovakia (until December 31, 1992)
Tunisia	852	871	932	1009	1106	1214	1365	1475	1630	1815	1965	2205	2635	3245	3830	1.832	0.924319	0.345434	0.0214199	0.00235335	0.0211801	0	0.0003	0.0452533	0.0452533	0.390687		Tunisia	1.86023e-05	1.8427e-05	1.91423e-05	1.99396e-05	2.14768e-05	2.33228e-05	2.76643e-05	2.96307e-05	3.30285e-05	3.68787e-05	3.85737e-05	4.14014e-05	4.71608e-05	5.96667e-05	7.16291e-05		Tunisia	0.0001606	0.000159086	0.000165261	0.000172145
Turkey	65886	65706	65798	65548	65274	63193	60950	58450	56965	54925	52775	50940	49570	49700	47410	1.51	0.761857	0.0296332	0.016699	1.05535e-05	0.004403	0	0.0003	0.0214126	0.0214126	0.0510457		Turkey	0.000680673	0.000657747	0.000639452	0.000612919	0.000599755	0.000574446	0.000584493	0.000555586	0.00054617	0.000528064	0.000490201	0.000452568	0.000419795	0.000432406	0.000419545		Turkey	0.00162267	0.00156801	0.0015244	0.00146115
Turkmenistan	96	87	91	95	93	99	75	85	95	100	95	105	165	150	130	2.69	1.35721	0.13495	0.012				0.0003	0.0123	0.0123	0.14725		Turkmenistan	5.69709e-07	5.00276e-07	5.08011e-07	5.10274e-07	4.90854e-07	5.16954e-07	4.13146e-07	4.64112e-07	5.23214e-07	5.52272e-07	5.06881e-07	5.35859e-07	8.02673e-07	7.49657e-07	6.60828e-07		Turkmenistan	6.82031e-06	5.98909e-06	6.08168e-06	6.10878e-06
Tuvalu	0	0	0	0	0	0	0	0	0	0	0	0	0	0	0	3.208	1.61857	0.1664	0.00075				0.0003	0.00105	0.00105	0.16745		Tuvalu	0	0	0	0	0	0	0	0	0	0	0	0	0	0	0		Tuvalu	0	0	0	0
Uganda	159	178	183	209	224	258	315	330	370	415	445	465	580	795	950	4.283	2.16095	0.382204	0.00075		0.168		0.0003	0.16905	0.16905	0.551254		Uganda	1.29685e-05	1.40676e-05	1.40408e-05	1.54289e-05	1.6249e-05	1.8516e-05	2.38486e-05	2.47644e-05	2.80071e-05	3.15001e-05	3.26327e-05	3.26155e-05	3.87787e-05	5.46071e-05	6.6371e-05		Uganda	4.22888e-05	4.5873e-05	4.57856e-05	5.03121e-05
Ukraine	8800	8774	9013	9136	10045	11175	11480	11440	11590	11830	11920	12365	65385	64105	68245	0.977	0.492936	0	0.001				0.0003	0.0013	0.0013	0.0013		Ukraine	5.51954e-06	5.33245e-06	5.31789e-06	5.1865e-06	5.60348e-06	6.16741e-06	6.68378e-06	6.60188e-06	6.74649e-06	6.9052e-06	6.72198e-06	6.6695e-06	3.36179e-05	3.38611e-05	3.66652e-05		Ukraine	5.51954e-06	5.33245e-06	5.31789e-06	5.1865e-06
Hungary	6505	7770	10368	13666	16267	18842	20465	21250	21985	22100	22115	22160	21980	22275	21685	1.51	0.761857	0	0.001				0.0003	0.0013	0.0013	0.0013		Hungary	4.08007e-06	4.72226e-06	6.11737e-06	7.75817e-06	9.07435e-06	1.03988e-05	1.19149e-05	1.22631e-05	1.27974e-05	1.28998e-05	1.24712e-05	1.19528e-05	1.13011e-05	1.1766e-05	1.16504e-05		Hungary	4.08007e-06	4.72226e-06	6.11737e-06	7.75817e-06
Unclear / No information provided	569	546	599	650	811	1045	1100	1065	1055	1050	1070	1050	1060	1015	935	n.a.												Unclear / No information provided																	Unclear / No information provided
Uruguay	38	35	33	35	33	36	10	25	30	25	40	40	55	45	65	1.409	0.710898	0.0198812	0.01				0.0003	0.0103	0.0103	0.0301812		Uruguay	1.88842e-07	1.68535e-07	1.54269e-07	1.57427e-07	1.45853e-07	1.57417e-07	4.6129e-08	1.14308e-07	1.3836e-07	1.15618e-07	1.78721e-07	1.70944e-07	2.24052e-07	1.88329e-07	2.76688e-07		Uruguay	5.53346e-07	4.93844e-07	4.5204e-07	4.61295e-07
Uzbekistan	475	481	471	461	459	465	470	495	510	560	575	625	670	745	845	3.5	1.76589	0.135028	0.03				0.0003	0.0303	0.0303	0.165328		Uzbekistan	6.94405e-06	6.81355e-06	6.47724e-06	6.09984e-06	5.96788e-06	5.98146e-06	6.3779e-06	6.65804e-06	6.91932e-06	7.61866e-06	7.55767e-06	7.8574e-06	8.02911e-06	9.17203e-06	1.05813e-05		Uzbekistan	3.78894e-05	3.71773e-05	3.53423e-05	3.3283e-05
Vanuatu	1	1	1	1	1	1	0	0	0	0	0	0	0	0	0	3.596	1.81433	0.351975	0.00075				0.0003	0.00105	0.00105	0.353025		Vanuatu	5.06601e-10	4.90879e-10	4.76558e-10	4.58526e-10	4.50561e-10	4.4576e-10	0	0	0	0	0	0	0	0	0		Vanuatu	1.70327e-07	1.65041e-07	1.60226e-07	1.54163e-07
Vatican City	0	0	0	0	0	0	0	0	0	0	0	0	0	0	0	n.a.												Vatican City																	Vatican City
Venezuela, Bolivarian Republic of	366	379	385	391	405	423	430	450	475	515	525	520	525	720	795	2.079	1.04894	0.106173	0.00377107	0.00400629	0.0207201	0	0.0003	0.0287975	0.0287975	0.134971		Venezuela, Bolivarian Republic of	5.08525e-06	5.10246e-06	5.03201e-06	4.91707e-06	5.00466e-06	5.17139e-06	5.54575e-06	5.75262e-06	6.1249e-06	6.65902e-06	6.5583e-06	6.21318e-06	5.97948e-06	8.42468e-06	9.46154e-06		Venezuela, Bolivarian Republic of	2.3834e-05	2.39146e-05	2.35845e-05	2.30457e-05
United Arab Emirates	156	297	400	471	575	764	900	710	530	435	375	405	425	415	375	1.2	0.605449	0.495076	0.0171		0.0189		0.0003	0.0363	0.0363	0.531376		United Arab Emirates	2.73217e-06	5.04021e-06	6.59011e-06	7.46625e-06	8.95652e-06	1.17737e-05	1.46314e-05	1.1441e-05	8.61457e-06	7.08997e-06	5.90494e-06	6.09983e-06	6.10162e-06	6.12098e-06	5.62571e-06		United Arab Emirates	3.99948e-05	7.37809e-05	9.64691e-05	0.000109294
United States	4988	5222	5315	5423	5517	5638	5715	5675	5815	5820	5580	5745	5705	5820	5650	1.6165	0.81559	0.0386324	0.00384663	0.00711948	0.00861795	0.00118313	0.0003	0.0210672	0.0218799	0.0596996		United States	5.26562e-05	5.34156e-05	5.27807e-05	5.18156e-05	5.17981e-05	5.237e-05	5.60014e-05	5.51201e-05	5.697e-05	5.71764e-05	5.29612e-05	5.21545e-05	4.93687e-05	5.17411e-05	5.10898e-05		United States	0.000143673	0.000145745	0.000144013	0.000141379
United Kingdom	3730	3852	3925	4131	4196	4166	4195	3830	3660	3125	3075	2890	2865	2805	2680	1.56	0.787084	0.0195831	0.00451323	0.0013378	0.00457919	0.000575841	0.0017718	0.0127779	0.0134903	0.032361		United Kingdom	2.42776e-05	2.42936e-05	2.40318e-05	2.4336e-05	2.42896e-05	2.38589e-05	2.53448e-05	2.2936e-05	2.21081e-05	1.89286e-05	1.79946e-05	1.61761e-05	1.5286e-05	1.53752e-05	1.49415e-05		United Kingdom	5.82382e-05	5.82765e-05	5.76485e-05	5.83784e-05
Vietnam	5085	5171	5206	5187	5224	5329	5450	5370	5535	5525	5460	5540	6170	6860	7755	1.913	0.965187	0.208254	0.0259562	0	0	0.090939	0.0003	0.117195	0.132723	0.325449		Vietnam	0.000325623	0.000320854	0.000313601	0.000300634	0.000297519	0.000300265	0.000323952	0.000316388	0.000328939	0.000329251	0.000314353	0.000305079	0.000323878	0.000369945	0.000425372		Vietnam	0.000798456	0.000786761	0.000768977	0.000737181
Central African Republic	0	1	1	1	1	3	0	0	0	0	0	0	0	0	0	6.012	3.0333	0.4071	0.001	0.001	0.151		0.0003	0.1533	0.1533	0.5604		Central African Republic	0	7.16684e-08	6.95774e-08	6.69448e-08	6.5782e-08	1.95243e-07	0	0	0	0	0	0	0	0	0		Central African Republic	0	2.61989e-07	2.54346e-07	2.44722e-07
Cyprus	31	44	54	79	89	93	85	80	105	120	115	120	150	140	130	1.389	0.700807	0.4148	0.15		0.01		0.0003	0.1603	0.167094	0.5751		Cyprus	2.49919e-06	3.43715e-06	4.09526e-06	5.76451e-06	6.38139e-06	6.59714e-06	6.36087e-06	5.93402e-06	7.85599e-06	9.00306e-06	8.33559e-06	8.31952e-06	9.91293e-06	9.50507e-06	8.97726e-06		Cyprus	8.60165e-06	1.18299e-05	1.40949e-05	1.98402e-05
Number of non-German women in childbearing age in Bavaria	353103	366242	387022	417245	448597	484781	515500	528205	550470	563725	569730	588250	660180	674805	679435	1.982												Sum significant variants	0.00431557	0.00430241	0.00435669	0.0044228	0.00463029	0.00500398	0.00574893	0.00589298	0.00625118	0.00644038	0.00624668	0.00615862	0.00618169	0.00661078	0.00687086		Sum all variants	0.0141239	0.0142186	0.0145923	0.0149325
Number of all women in childbearing age in Bavaria	3011040	2968749	2960899	2952718	2938580	2934499	2917481	2895216	2877277	2854430	2824255	2808042	2782185	2787711	2803538
Share of non-German women in childbearing age	0.117269	0.123366	0.130711	0.141309	0.152658	0.165201	0.176694	0.182441	0.191316	0.197491	0.201728	0.209488	0.237288	0.242064	0.242349
Number of live births with non-German mother in Bavaria	17931	17750	18802	19963	21932	24332	29017	29588	31455	32456	31823	32784	32611	31944	32113
Total live births in Bavaria	105251	103668	107039	109562	113935	118228	125686	126187	127616	128227	128764	134321	124897	116505	114365
Live births with non-German mother % of all live births in Bavaria	0.170364	0.17122	0.175656	0.182207	0.192496	0.205806	0.230869	0.234477	0.246482	0.253114	0.247142	0.244072	0.261103	0.274186	0.280794
Fertility rate adjustment factor	1.45276	1.3879	1.34385	1.28943	1.26096	1.24579	1.30661	1.28523	1.28835	1.28164	1.22513	1.16509	1.10036	1.1327	1.15863
Fertility adjusted haemoglobinopathy carriage rate, significant variants	0.00431557	0.00430241	0.00435669	0.0044228	0.00463029	0.00500398	0.00574893	0.00589298	0.00625118	0.00644038	0.00624668	0.00615862	0.00618169	0.00661078	0.00687086
Fertility adjusted haemoglobinopathy carriage rate, all variants	0.0141239	0.0142186	0.0145923	0.0149325	0.0157899	0.0171378	0.0198625	0.0204743	0.021931	0.0229439	0.0224343	0.0225233	0.0230509	0.0251799	0.0266959
Fertility adjusted haemoglobinopathy carriage rate (country weighted), significant variants	0.00420145	0.0042079	0.00431209	0.00443521	0.00474258	0.00529983	0.00640458	0.00671466	0.00724087	0.0074961	0.0072671	0.00717625	0.00721895	0.00774922	0.00808722
Fertility adjusted haemoglobinopathy carriage rate (country weighted), all variants	0.0143298	0.0144619	0.01498	0.0154624	0.016588	0.0184642	0.0223414	0.023391	0.0253525	0.0266125	0.0259962	0.0261395	0.0268684	0.0294423	0.031315
CF: haemoglobinopathies carrier frequency in pregnancies; SV: only significant variants; AV: any variant; TFR (2023): total fertility rate as published for the year 2023; Cw FRF: country-specific fertility-rate weighting factor
[truncated: 43 more columns]

## Sheet: S4
Berlin	2010	2011	2012	2013	2014	2015	2016	2017	2018	2019	2020	2021	2022	2023	2024	TFR 2023	Cw FRF 20203	CF any alpha variant	CF A/ß-Thal.	CF A/HbC	CF A/HbS	CF A/HbE	CF other beta variants	CF any beta variant	CF, SV (a/b coincidence)	CF, AV (a/b coincidence)		significant variants	2010	2011	2012	2013	2014	2015	2016	2017	2018	2019	2020	2021	2022	2023	2024		all variants	2010	2011	2012	2013
Afghanistan	298	370	417	490	604	1714	2340	2455	2630	2820	3040	3620	4480	5035	5465	4.84	2.44198	0.151944	0.03				0.0003	0.0303	0.0303	0.182244		Afghanistan	1.33285e-05	1.66659e-05	1.89817e-05	2.29913e-05	2.8063e-05	7.75818e-05	0.000107639	8.13106e-05	9.67194e-05	0.000105768	0.000116917	0.000138304	0.000165804	0.000191915	0.000220136		Afghanistan	8.01664e-05	0.000100239	0.000114168	0.000138285
Egypt	425	409	433	497	570	649	825	865	1035	1155	1265	1385	1605	1825	1835	2.75	1.38749	0.161989	0.02		0.002		0.0003	0.0223	0.0223	0.184289		Egypt	1.399e-05	1.35585e-05	1.4506e-05	1.71627e-05	1.9491e-05	2.162e-05	2.793e-05	2.1085e-05	2.80131e-05	3.18824e-05	3.58062e-05	3.89438e-05	4.37173e-05	5.11957e-05	5.44e-05		Egypt	0.000115614	0.000112049	0.000119879	0.000141834
Albania	127	126	140	155	225	720	495	515	700	915	1055	1275	1600	1815	1955	1.348	0.680121	0.0879363	0.05	0	0.03	0	0.0003	0.0803	0.0803	0.168236		Albania	1.50537e-05	1.50408e-05	1.68888e-05	1.9274e-05	2.77046e-05	8.63683e-05	6.03439e-05	4.52039e-05	6.82227e-05	9.09496e-05	0.00010753	0.000129095	0.000156931	0.00018334	0.000208699		Albania	3.15389e-05	3.15119e-05	3.53837e-05	4.03809e-05
Algeria	182	180	191	201	205	218	225	245	300	290	285	315	345	395	405	2.766	1.39556	0.346633	0.035	0.012	0.009		0.0003	0.0563	0.0563	0.402933		Algeria	1.51252e-05	1.50648e-05	1.61546e-05	1.75238e-05	1.76977e-05	1.83346e-05	1.92311e-05	1.50774e-05	2.04996e-05	2.02102e-05	2.03665e-05	2.23616e-05	2.37247e-05	2.79751e-05	3.03125e-05		Algeria	0.00010825	0.000107817	0.000115617	0.000125416
Andorra	0	0	0	0	0	0	0	0	0	0	0	0	0	0	0	1.082	0.545913	0	0.001				0.0003	0.0013	0.0013	0.0013		Andorra	0	0	0	0	0	0	0	0	0	0	0	0	0	0	0		Andorra	0	0	0	0
Angola	279	280	284	274	247	235	230	225	230	230	210	200	210	220	220	5.124	2.58527	0.406157	0.00075		0.247		0.0003	0.24805	0.24805	0.654207		Angola	0.000102157	0.000103248	0.000105831	0.000105248	9.39486e-05	8.7079e-05	8.66123e-05	6.10063e-05	6.9244e-05	7.06205e-05	6.61182e-05	6.25537e-05	6.36256e-05	6.8648e-05	7.25471e-05		Angola	0.000269428	0.000272306	0.000279119	0.000277581
Antigua and Barbuda	0	0	0	0	0	1	0	0	0	0	0	0	0	0	0	1.578	0.796165	0.213231	0.01	0.02	0.1		0.0003	0.1303	0.1303	0.343531		Antigua and Barbuda	0	0	0	0	0	1.94648e-07	0	0	0	0	0	0	0	0	0		Antigua and Barbuda	0	0	0	0
Equatorial Guinea	14	14	11	11	11	13	10	10	10	10	5	10	10	5	10	4.081	2.05903	0.4071	0.00075		0.2		0.0003	0.20105	0.20105	0.60815		Equatorial Guinea	4.15484e-06	4.18423e-06	3.3224e-06	3.42469e-06	3.39118e-06	3.90439e-06	3.05222e-06	2.19764e-06	2.44017e-06	2.48867e-06	1.27596e-06	2.53506e-06	2.45571e-06	1.26456e-06	2.67277e-06		Equatorial Guinea	1.25679e-05	1.26568e-05	1.00498e-05	1.03592e-05
Argentina	242	253	255	270	263	278	320	340	410	470	610	750	885	995	1045	1.5	0.756811	0.0218768	0.01				0.0003	0.0103	0.0103	0.0321768		Argentina	3.67939e-06	3.87384e-06	3.94578e-06	4.30651e-06	4.15381e-06	4.27748e-06	5.0038e-06	3.82798e-06	5.1255e-06	5.99238e-06	7.97497e-06	9.74052e-06	1.11341e-05	1.28922e-05	1.43091e-05		Argentina	1.14943e-05	1.21017e-05	1.23265e-05	1.34534e-05
Armenia	247	291	337	366	395	433	490	555	605	610	595	625	715	785	785	1.9	0.958628	0.019899	0.02				0.0003	0.0203	0.0203	0.040199		Armenia	7.40143e-06	8.78158e-06	1.02774e-05	1.15054e-05	1.22955e-05	1.31308e-05	1.5101e-05	1.23152e-05	1.49062e-05	1.53282e-05	1.53312e-05	1.59978e-05	1.77287e-05	2.00462e-05	2.11848e-05		Armenia	1.46567e-05	1.73897e-05	2.03517e-05	2.27835e-05
Azerbaijan	317	327	347	355	355	372	440	475	560	600	615	695	800	925	970	1.55	0.782038	0.316272	0.054		0.006		0.0003	0.0603	0.0603	0.376572		Azerbaijan	2.82162e-05	2.93122e-05	3.14342e-05	3.3149e-05	3.28246e-05	3.35094e-05	4.02793e-05	3.13086e-05	4.09846e-05	4.4785e-05	4.70711e-05	5.28428e-05	5.89225e-05	7.01657e-05	7.77584e-05		Azerbaijan	0.00017621	0.000183054	0.000196306	0.000207015
Ethiopia	202	200	186	181	183	181	210	210	210	215	220	225	245	260	270	3.989	2.01261	0.0198931	0.005	0	0.001		0.0003	0.0063	0.0063	0.0261931		Ethiopia	1.87851e-06	1.87307e-06	1.76039e-06	1.76581e-06	1.76785e-06	1.70343e-06	2.0085e-06	1.44615e-06	1.60574e-06	1.67665e-06	1.75924e-06	1.78734e-06	1.8853e-06	2.06053e-06	2.26132e-06		Ethiopia	7.81017e-06	7.78754e-06	7.31905e-06	7.34158e-06
Australia	615	732	857	942	975	1150	1315	1440	1515	1605	1330	1205	1205	1280	1275	1.5	0.756811	0.0363039	0.00425757	8.18525e-05	0.00113573	0.00433954	5.97528e-05	0.00987444	0.0122397	0.0461784		Australia	1.11114e-05	1.33188e-05	1.57582e-05	1.78544e-05	1.82991e-05	2.10269e-05	2.44348e-05	1.92658e-05	2.2506e-05	2.4317e-05	2.06626e-05	1.85969e-05	1.80149e-05	1.97082e-05	2.07462e-05		Australia	4.19214e-05	5.02497e-05	5.94531e-05	6.73618e-05
Bahamas	2	1	1	1	1	1	0	0	0	0	0	0	0	0	0	1.373	0.692735	0.291373	0.01	0.03	0.14		0.0003	0.1803	0.1803	0.471673		Bahamas	5.3229e-07	2.68028e-07	2.70864e-07	2.79203e-07	2.76471e-07	2.69341e-07	0	0	0	0	0	0	0	0	0		Bahamas	1.39249e-06	7.01172e-07	7.08592e-07	7.30408e-07
Bahrain	2	4	9	14	19	20	10	10	25	20	25	20	25	25	20	1.824	0.920283	0.554856	0.029		0.138		0.0003	0.1673	0.167766	0.722156		Bahrain	4.95286e-07	9.97578e-07	2.2683e-06	3.63711e-06	4.88777e-06	5.01233e-06	2.54692e-06	1.83382e-06	5.09048e-06	4.15334e-06	5.3236e-06	4.23075e-06	5.12291e-06	5.27605e-06	4.46058e-06		Bahrain	2.13198e-06	4.29413e-06	9.76403e-06	1.56561e-05
Bangladesh	274	292	319	332	348	359	410	435	480	540	560	610	680	800	860	2.163	1.09132	0.495591	0.025			0.04	0.0003	0.0653	0.0653	0.560891		Bangladesh	2.64111e-05	2.83452e-05	3.12939e-05	3.35719e-05	3.48455e-05	3.50198e-05	4.06452e-05	3.10496e-05	3.80426e-05	4.36487e-05	4.64155e-05	5.02258e-05	5.4237e-05	6.57157e-05	7.46569e-05		Bangladesh	0.000226857	0.00024347	0.000268797	0.000288364
Barbados	2	2	2	2	2	2	0	0	0	0	0	0	0	0	0	1.708	0.861756	0.151943	0.005	0.046	0.07		0.0003	0.1213	0.1213	0.273243		Barbados	3.58108e-07	3.6064e-07	3.64457e-07	3.75678e-07	3.72002e-07	3.62407e-07	0	0	0	0	0	0	0	0	0		Barbados	8.06681e-07	8.12387e-07	8.20984e-07	8.4626e-07
Belarus	836	874	909	914	938	973	1025	1060	1065	1120	1130	1205	1335	1375	1285	1.208	0.609485	0	0.001				0.0003	0.0013	0.0013	0.0013		Belarus	1.60425e-06	1.68903e-06	1.77526e-06	1.83998e-06	1.86982e-06	1.88957e-06	2.02292e-06	1.50627e-06	1.68038e-06	1.80229e-06	1.86459e-06	1.97521e-06	2.11982e-06	2.2486e-06	2.22078e-06		Belarus	1.60425e-06	1.68903e-06	1.77526e-06	1.83998e-06
Belgium	413	402	394	390	380	476	560	1300	850	860	875	890	895	875	870	1.47	0.741675	0.027938	0.00335428	0.000486604	0.00568933	0.000388821	0.0003	0.010219	0.0103997	0.0381571		Belgium	6.34006e-06	6.21485e-06	6.15563e-06	6.28072e-06	6.0598e-06	7.39493e-06	8.8414e-06	1.4778e-05	1.07289e-05	1.10709e-05	1.15502e-05	1.16706e-05	1.13689e-05	1.14471e-05	1.20281e-05		Belgium	2.3262e-05	2.28026e-05	2.25853e-05	2.30443e-05
Belize	0	1	1	1	1	2	0	0	0	0	0	0	0	0	0	2.007	1.01261	0.109808	0.00075	0.01	0.05		0.0003	0.06105	0.06105	0.170858		Belize	0	9.07547e-08	9.17151e-08	9.45388e-08	9.36137e-08	1.82399e-07	0	0	0	0	0	0	0	0	0		Belize	0	2.53991e-07	2.56679e-07	2.64581e-07
Benin	37	38	40	43	53	55	50	50	70	90	90	95	85	150	175	4.556	2.29869	0.406157	0.002	0.102	0.228		0.0003	0.3323	0.3323	0.738457		Benin	1.81491e-05	1.87714e-05	1.99685e-05	2.2127e-05	2.7006e-05	2.73023e-05	2.52239e-05	1.81616e-05	2.82321e-05	3.702e-05	3.79608e-05	3.9805e-05	3.45003e-05	6.27029e-05	7.73084e-05		Benin	4.0332e-05	4.1715e-05	4.43752e-05	4.9172e-05
Bhutan	2	1	1	0	0	0	0	0	0	0	0	0	0	0	0	1.462	0.737639	0.95976	0.00075			0.04	0.0003	0.04105	0.04105	1.00081		Bhutan	1.2119e-07	6.10235e-08	6.16692e-08	0	0	0	0	0	0	0	0	0	0	0	0		Bhutan	2.95464e-06	1.48777e-06	1.50351e-06	0
Bolivia, Plurinational State of	102	105	95	103	101	101	100	100	115	105	100	110	145	135	145	2.547	1.28507	0.0590913	0.02				0.0003	0.0203	0.0203	0.0793913		Bolivia, Plurinational State of	3.05646e-06	3.16861e-06	2.89718e-06	3.23786e-06	3.14392e-06	3.06283e-06	3.08183e-06	2.21896e-06	2.83341e-06	2.63845e-06	2.57667e-06	2.81561e-06	3.59532e-06	3.44743e-06	3.91311e-06		Bolivia, Plurinational State of	1.19535e-05	1.23921e-05	1.13306e-05	1.26629e-05
Bosnia and Herzegovina	3118	3107	3234	3364	3570	3541	3335	3390	3450	3415	3385	3545	3630	3700	3635	1.486	0.749748	0.0198911	0.015				0.0003	0.0153	0.0153	0.0351911		Bosnia and Herzegovina	7.04191e-05	7.06669e-05	7.43339e-05	7.97025e-05	8.37555e-05	8.09326e-05	7.74639e-05	5.66949e-05	6.40657e-05	6.46764e-05	6.57374e-05	6.83898e-05	6.78378e-05	7.1213e-05	7.39357e-05		Bosnia and Herzegovina	0.000161969	0.000162539	0.000170973	0.000183321
Botswana	4	5	5	5	8	6	0	0	0	0	0	0	0	0	5	2.732	1.37841	0.124804	0.00075		0		0.0003	0.00105	0.00105	0.125854		Botswana	6.19972e-09	7.80446e-09	7.88705e-09	8.12987e-09	1.28805e-08	9.41124e-09	0	0	0	0	0	0	0	0	6.97939e-09		Botswana	7.43105e-07	9.35451e-07	9.4535e-07	9.74455e-07
Brazil	1473	1577	1653	1779	1818	1905	2130	2410	2720	3050	3075	3170	3580	3750	3715	1.619	0.816852	0.0596709	0.01	0.00616	0.02684		0.0003	0.0433	0.0433	0.102971		Brazil	9.41485e-05	0.000101509	0.000107527	0.000119286	0.000120708	0.000123222	0.000140017	0.000114066	0.000142946	0.000163475	0.000169003	0.000173074	0.000189341	0.000204261	0.000213848		Brazil	0.000223893	0.000241396	0.000255707	0.000283671
British Overseas Territories	0	0	0	44	45	43	25	25	15	25	35	45	30	30	30	n.a.		0.172628	0.01	0.02	0.08		0.0003	0.1103	0.1103	0.282928		British Overseas Territories	0	0	0	7.51541e-06	7.611e-06	7.08517e-06	4.18628e-06	3.01418e-06	2.00808e-06	3.41334e-06	4.90011e-06	6.25852e-06	4.04176e-06	4.16258e-06	4.39901e-06		British Overseas Territories	0	0	0	1.92776e-05
Brunei Darussalam	0	0	0	0	1	1	0	0	0	0	0	0	0	0	0	1.747	0.881433	0.2431	0.03			0.01	0.0003	0.0403	0.0403	0.2834		Brunei Darussalam	0	0	0	0	6.17958e-08	6.0202e-08	0	0	0	0	0	0	0	0	0		Brunei Darussalam	0	0	0	0
Bulgaria	2756	2980	3391	3323	3213	4423	5480	11770	11110	10970	11135	11210	11325	11465	10770	1.81	0.913219	0	0.03				0.0003	0.0303	0.0303	0.0303		Bulgaria	0.000123266	0.000134228	0.000154357	0.000155918	0.000149282	0.000200201	0.000252078	0.000389827	0.000408575	0.000411446	0.000428248	0.000428284	0.000419135	0.000437001	0.000433827		Bulgaria	0.000123266	0.000134228	0.000154357	0.000155918
Burkina Faso	14	16	18	25	25	25	10	5	35	50	50	50	60	80	80	4.186	2.11201	0.405591	0.012	0.167	0.086		0.0003	0.2653	0.2653	0.670891		Burkina Faso	5.48262e-06	6.31017e-06	7.17406e-06	1.02707e-05	1.01702e-05	9.90794e-06	4.02763e-06	1.44997e-06	1.12699e-05	1.64199e-05	1.68372e-05	1.6726e-05	1.94429e-05	2.66989e-05	2.82154e-05		Burkina Faso	1.38645e-05	1.59572e-05	1.81418e-05	2.59727e-05
Burundi	9	8	10	11	11	13	0	0	0	0	0	0	0	0	5	4.878	2.46115	0.382204	0.00075		0.189		0.0003	0.19005	0.19005	0.572254		Burundi	2.52484e-06	2.26017e-06	2.85511e-06	3.23732e-06	3.20564e-06	3.69077e-06	0	0	0	0	0	0	0	0	1.26327e-06		Burundi	7.60246e-06	6.80554e-06	8.59695e-06	9.74779e-06
Cape Verde	5	6	6	7	6	8	0	0	0	0	0	0	5	5	5	1.522	0.767911	0.36	0.00075		0.042		0.0003	0.04305	0.04305	0.40305		Cape Verde	3.17736e-07	3.8398e-07	3.88043e-07	4.66655e-07	3.96076e-07	5.14481e-07	0	0	0	0	0	0	2.62916e-07	2.70775e-07	2.86155e-07		Cape Verde	2.97476e-06	3.59496e-06	3.633e-06	4.36899e-06
Chile	289	306	323	327	309	342	400	455	535	655	745	840	885	945	1010	1.167	0.588799	0.0198931	0.01				0.0003	0.0103	0.0103	0.0301931		Chile	4.39398e-06	4.68535e-06	4.99799e-06	5.21566e-06	4.88033e-06	5.26223e-06	6.25474e-06	5.12273e-06	6.68815e-06	8.35108e-06	9.73993e-06	1.09094e-05	1.11341e-05	1.22443e-05	1.38298e-05		Chile	1.28804e-05	1.37345e-05	1.46509e-05	1.5289e-05
China	2910	3054	3170	2987	3200	3493	3855	4215	4660	5045	5045	5085	5360	5745	6010	0.999	0.504036	0.112521	0.0101174	0	0	0.000210548	0.0003	0.010628	0.0241609	0.123149		China	0.000103783	0.00010969	0.000115061	0.000111756	0.000118554	0.000126072	0.0001414	0.000111317	0.000136651	0.000150882	0.000154716	0.000154913	0.00015818	0.00017461	0.000193039		China	0.000528987	0.000559091	0.000586468	0.000569625
Costa Rica	44	43	42	40	43	50	40	50	60	80	75	75	105	105	140	1.33	0.671039	0.0446649	0.00075	0.002	0.02		0.0003	0.02305	0.02305	0.0677149		Costa Rica	1.49708e-06	1.47341e-06	1.45437e-06	1.42776e-06	1.51982e-06	1.72166e-06	1.39973e-06	1.25978e-06	1.67856e-06	2.28257e-06	2.19429e-06	2.1798e-06	2.9562e-06	3.04457e-06	4.29e-06		Costa Rica	4.39805e-06	4.32849e-06	4.27257e-06	4.19439e-06
Côte d'Ivoire	50	44	51	54	54	60	45	45	50	40	35	40	55	65	65	4.283	2.16095	0.389764	0.039	0.063	0.084		0.0003	0.1863	0.1863	0.576064		Côte d'Ivoire	1.37501e-05	1.21857e-05	1.42738e-05	1.55787e-05	1.54263e-05	1.66982e-05	1.27273e-05	9.16386e-06	1.13057e-05	9.22437e-06	8.27643e-06	9.39629e-06	1.25155e-05	1.52332e-05	1.60985e-05		Côte d'Ivoire	4.25171e-05	3.76797e-05	4.41363e-05	4.81714e-05
Denmark	990	999	991	985	953	1089	1155	2695	1465	1340	1330	1265	1240	1225	1065	1.5	0.756811		0.00225396	8.50554e-05	0.000687419	0.000628425	0.0003	0.00395486	0.00417812	0.00395486		Denmark	6.10575e-06	6.20484e-06	6.22028e-06	6.37297e-06	6.1056e-06	6.79697e-06	7.32615e-06	1.23082e-05	7.42906e-06	6.93027e-06	7.05335e-06	6.66431e-06	6.32815e-06	6.43848e-06	5.91547e-06		Denmark	5.77949e-06	5.87328e-06	5.8879e-06	6.03243e-06
Dominica	6	4	4	7	7	7	0	0	0	0	0	0	0	0	0	1.484	0.748739	0.328911	0.0075	0.015	0.16		0.0003	0.1828	0.1828	0.511711		Dominica	1.61901e-06	1.08698e-06	1.09848e-06	1.98152e-06	1.96213e-06	1.91153e-06	0	0	0	0	0	0	0	0	0		Dominica	4.53209e-06	3.04277e-06	3.07497e-06	5.54686e-06
Dominican Republic	218	225	216	234	226	225	220	215	205	205	200	205	225	230	240	2.243	1.13169	0.252813	0.01	0.03	0.12		0.0003	0.1603	0.1603	0.413113		Dominican Republic	5.15837e-05	5.36167e-05	5.20167e-05	5.80863e-05	5.55515e-05	5.38793e-05	5.35388e-05	3.76726e-05	3.98844e-05	4.06772e-05	4.06936e-05	4.14353e-05	4.40544e-05	4.63796e-05	5.1145e-05		Dominican Republic	0.000132938	0.000138177	0.000134053	0.000149696
Djibouti	2	2	2	2	2	4	0	0	0	0	0	0	0	0	0	2.609	1.31635	0.0196773	0.00075				0.0003	0.00105	0.00105	0.0207273		Djibouti	3.09986e-09	3.12178e-09	3.15482e-09	3.25195e-09	3.22013e-09	6.27416e-09	0	0	0	0	0	0	0	0	0		Djibouti	6.1192e-08	6.16248e-08	6.22769e-08	6.41943e-08
Ecuador	144	160	164	169	167	183	205	220	225	240	230	230	255	290	315	1.823	0.919778	0.0224466	0.01		0.01		0.0003	0.0203	0.0203	0.0427466		Ecuador	4.315e-06	4.82836e-06	5.00144e-06	5.3126e-06	5.19836e-06	5.54949e-06	6.31775e-06	4.88171e-06	5.54362e-06	6.03075e-06	5.92633e-06	5.88718e-06	6.32281e-06	7.40559e-06	8.5009e-06		Ecuador	9.0863e-06	1.01673e-05	1.05318e-05	1.1187e-05
El Salvador	21	26	28	29	30	38	35	35	40	55	70	85	80	75	90	1.775	0.89556	0.0340384	0.00075		0.0152		0.0003	0.01625	0.01625	0.0502884		El Salvador	5.03727e-07	6.28073e-07	6.83544e-07	7.29753e-07	7.4753e-07	9.22451e-07	8.63443e-07	6.21691e-07	7.88912e-07	1.10632e-06	1.44382e-06	1.74163e-06	1.58788e-06	1.53314e-06	1.94426e-06		El Salvador	1.55887e-06	1.94368e-06	2.11535e-06	2.25835e-06
Eritrea	30	36	35	35	79	180	245	255	275	285	285	330	335	380	400	3.713	1.87336	0.0198931	0.005		0.001		0.0003	0.0063	0.0063	0.0261931		Eritrea	2.78987e-07	3.37153e-07	3.31256e-07	3.41455e-07	7.6317e-07	1.69402e-06	2.34325e-06	1.75604e-06	2.10275e-06	2.22254e-06	2.27902e-06	2.62143e-06	2.57786e-06	3.01155e-06	3.35011e-06		Eritrea	1.15993e-06	1.40176e-06	1.37724e-06	1.41964e-06
Estonia	209	215	227	223	211	248	285	630	520	510	485	475	480	500	510	1.31	0.660949	0	0.001				0.0003	0.0013	0.0013	0.0013		Estonia	4.01063e-07	4.15495e-07	4.43327e-07	4.48924e-07	4.2061e-07	4.81616e-07	5.62472e-07	8.95235e-07	8.20468e-07	8.20687e-07	8.0029e-07	7.78611e-07	7.62181e-07	8.17672e-07	8.81397e-07		Estonia	4.01063e-07	4.15495e-07	4.43327e-07	4.48924e-07
Eswatini	2	1	1	1	2	4	0	0	0	0	0	0	0	0	0	2.753	1.389	0.125125	0.00075		0.005		0.0003	0.00605	0.00605	0.131175		Eswatini	1.78611e-08	8.99371e-09	9.08889e-09	9.36871e-09	1.85541e-08	3.61511e-08	0	0	0	0	0	0	0	0	0		Eswatini	3.8726e-07	1.95e-07	1.97063e-07	2.0313e-07
Fiji	1	1	0	1	2	3	0	0	0	0	0	0	0	0	0	2.281	1.15086	0.351975	0.00075				0.0003	0.00105	0.00105	0.353025		Fiji	1.54993e-09	1.56089e-09	0	1.62597e-09	3.22013e-09	4.70562e-09	0	0	0	0	0	0	0	0	0		Fiji	5.21108e-07	5.24794e-07	0	5.46676e-07
Finland	668	661	656	654	637	757	850	1950	1140	1075	1050	1040	1025	1035	960	1.26	0.635721	0.00254627	0.00132379	3.54355e-05	0.000261161	0.000288624	0.0003	0.00220901	0.00232607	0.00475527		Finland	2.29362e-06	2.28564e-06	2.29236e-06	2.35573e-06	2.27204e-06	2.63042e-06	3.00161e-06	4.95805e-06	3.21842e-06	3.09525e-06	3.10009e-06	3.05028e-06	2.9122e-06	3.02851e-06	2.96861e-06		Finland	4.68894e-06	4.67262e-06	4.68635e-06	4.8159e-06
France	4760	4777	4759	4725	4527	5131	5880	13400	9465	9215	9155	8935	8835	8870	8260	1.66	0.837538	0.0311626	0.00305514	0.000636213	0.00540286	0.00145195	0.0003	0.0108462	0.0110525	0.0420087		France	7.76587e-05	7.84873e-05	7.9019e-05	8.08699e-05	7.67229e-05	8.47166e-05	9.8662e-05	0.000161889	0.000126969	0.000126072	0.000128434	0.00012452	0.000119273	0.000123325	0.000121366		France	0.000295168	0.000298317	0.000300338	0.000307373
Gabon	5	6	5	6	7	6	0	0	0	0	0	0	0	5	5	3.647	1.84006	0.6864	0.00075	0.001	0.252		0.0003	0.25405	0.25405	0.94045		Gabon	1.87505e-06	2.26597e-06	1.90829e-06	2.36045e-06	2.72691e-06	2.27707e-06	0	0	0	0	0	0	0	1.59792e-06	1.68868e-06		Gabon	6.9411e-06	8.38824e-06	7.06417e-06	8.73799e-06
Gambia	30	33	42	47	51	55	55	65	50	50	65	60	70	75	95	4.006	2.02119	0.389764	0.00075	0.016	0.136		0.0003	0.15305	0.15305	0.542814		Gambia	6.77762e-06	7.50812e-06	9.65691e-06	1.11392e-05	1.1969e-05	1.25748e-05	1.27793e-05	1.08743e-05	9.28792e-06	9.47256e-06	1.26273e-05	1.15789e-05	1.30859e-05	1.44398e-05	1.93293e-05		Gambia	2.40378e-05	2.66286e-05	3.42496e-05	3.95069e-05
Georgia	608	636	607	610	640	695	725	765	850	960	1010	1235	1710	1895	1820	1.81	0.913219	0.019899	0.03				0.0003	0.0303	0.0303	0.050199		Georgia	2.71937e-05	2.86473e-05	2.76304e-05	2.86218e-05	2.97356e-05	3.14582e-05	3.33498e-05	2.53371e-05	3.12591e-05	3.60062e-05	3.88442e-05	4.71838e-05	6.32867e-05	7.223e-05	7.33115e-05		Georgia	4.50528e-05	4.74609e-05	4.57761e-05	4.74187e-05
Ghana	583	573	572	585	596	605	635	675	730	760	785	815	920	1005	1070	3.397	1.71393	0.405968	0.003	0.112	0.158		0.0003	0.2733	0.2733	0.679268		Ghana	0.000235197	0.000232797	0.00023485	0.000247583	0.00024977	0.000247002	0.000263467	0.000201649	0.000242146	0.000257109	0.000272315	0.000280854	0.000307115	0.000345519	0.00038876		Ghana	0.000584565	0.000578602	0.000583704	0.000615349
Grenada	0	0	0	0	0	0	0	0	0	0	0	0	0	0	0	1.487	0.750252	0.213231	0.01	0.02	0.1		0.0003	0.1303	0.1303	0.343531		Grenada	0	0	0	0	0	0	0	0	0	0	0	0	0	0	0		Grenada	0	0	0	0
Greece	2556	2559	2557	2510	2455	2752	3090	6015	5040	4945	4900	4850	4840	4840	4620	1.32	0.665994	0.00957832	0.00468454	2.35023e-05	0.00245686	4.03832e-05	3.20226e-05	0.0072373	0.00727335	0.0168156		Greece	2.74421e-05	2.76687e-05	2.79396e-05	2.82704e-05	2.73804e-05	2.99012e-05	3.41197e-05	4.78215e-05	4.44918e-05	4.4521e-05	4.52369e-05	4.44795e-05	4.29985e-05	4.42839e-05	4.46719e-05		Greece	6.34449e-05	6.39686e-05	6.4595e-05	6.53599e-05
Guatemala	31	39	36	39	39	45	25	35	40	40	45	50	75	85	85	2.311	1.16599	0.0336926	0.00075				0.0003	0.00105	0.00105	0.0347426		Guatemala	4.80478e-08	6.08748e-08	5.67868e-08	6.3413e-08	6.27925e-08	7.05843e-08	3.98512e-08	4.01708e-08	5.09759e-08	5.19892e-08	5.99741e-08	6.61977e-08	9.61887e-08	1.12273e-07	1.1865e-07		Guatemala	1.58982e-06	2.01424e-06	1.87897e-06	2.09822e-06
Guinea	130	143	160	181	188	193	205	225	270	300	305	325	370	420	430	4.217	2.12765	0.405205	0.00075		0.227		0.0003	0.22805	0.22805	0.633255		Guinea	4.37619e-05	4.84786e-05	5.48158e-05	6.39195e-05	6.57418e-05	6.57497e-05	7.09735e-05	5.60874e-05	7.47324e-05	8.46867e-05	8.82861e-05	9.34538e-05	0.000103064	0.000120488	0.000130364		Guinea	0.000121519	0.000134617	0.000152214	0.000177493
Guinea-Bissau	11	11	11	13	18	19	5	5	5	5	5	0	0	5	5	3.836	1.93542	0.405205	0.00075	0.002	0.076		0.0003	0.07905	0.07905	0.484255		Guinea-Bissau	1.28356e-06	1.29264e-06	1.30632e-06	1.59136e-06	2.18187e-06	2.24368e-06	6.00046e-07	4.32041e-07	4.79719e-07	4.89256e-07	5.01689e-07	0	0	4.97208e-07	5.25448e-07		Guinea-Bissau	7.86302e-06	7.91864e-06	8.00244e-06	9.74859e-06
Guyana	1	1	1	1	2	2	0	0	0	0	0	0	0	0	0	2.412	1.21695	0.109685	0.00075	0.01	0.05		0.0003	0.06105	0.06105	0.170735		Guyana	9.01173e-08	9.07547e-08	9.17151e-08	9.45388e-08	1.87227e-07	1.82399e-07	0	0	0	0	0	0	0	0	0		Guyana	2.52026e-07	2.53809e-07	2.56495e-07	2.64391e-07
Haiti	10	10	11	11	12	14	0	0	0	0	0	0	5	0	0	2.656	1.34006	0.213231	0.01	0.03	0.1		0.0003	0.1403	0.1403	0.353531		Haiti	2.071e-06	2.08565e-06	2.31849e-06	2.38987e-06	2.58162e-06	2.93421e-06	0	0	0	0	0	0	8.56843e-07	0	0		Haiti	5.21855e-06	5.25547e-06	5.84219e-06	6.02205e-06
Honduras	22	23	24	24	27	29	15	20	25	50	45	65	105	140	145	2.5	1.26135	0.0336926	0.00075	0.0004	0.0016		0.0003	0.00305	0.00305	0.0367426		Honduras	9.90479e-08	1.04282e-07	1.09968e-07	1.13354e-07	1.26275e-07	1.32131e-07	6.9455e-08	6.66781e-08	9.25454e-08	1.8877e-07	1.74211e-07	2.49975e-07	3.91167e-07	5.37148e-07	5.87931e-07		Honduras	1.19321e-06	1.25627e-06	1.32476e-06	1.36554e-06
Hong Kong	0	0	0	0	4	12	15	35	50	50	45	35	80	120	135	0.751	0.37891	0.201389	0.03				0.0003	0.0303	0.07727	0.231689		Hong Kong	0	0	0	0	4.73942e-07	1.38515e-06	1.7596e-06	2.95619e-06	4.68917e-06	4.78239e-06	4.41353e-06	3.41006e-06	7.55048e-06	1.16643e-05	1.38677e-05		Hong Kong	0	0	0	0
India	717	737	753	836	927	1141	1405	1735	2325	3200	3985	5160	7435	9350	10525	1.975	0.996468	0.495591	0.0156702	0	0.0193568	0.00972176	0.0003	0.0450487	0.0450487	0.54064		India	4.76787e-05	4.93552e-05	5.09604e-05	5.83194e-05	6.40348e-05	7.67846e-05	9.60884e-05	8.54348e-05	0.000127122	0.000178442	0.000227862	0.0002931	0.000409107	0.000529858	0.000630322		India	0.000572203	0.000592324	0.000611587	0.000699905
Indonesia	551	582	600	629	685	738	790	845	915	940	970	1005	1085	1175	1225	2.127	1.07316	0.0784	0.039651	0	0	0.0187238	0.0003	0.0586748	0.0586748	0.137075		Indonesia	4.77228e-05	5.07643e-05	5.28882e-05	5.71514e-05	6.16306e-05	6.46866e-05	7.03706e-05	5.41953e-05	6.51611e-05	6.82722e-05	7.22414e-05	7.43535e-05	7.77598e-05	8.67273e-05	9.55534e-05		Indonesia	0.000111489	0.000118594	0.000123556	0.000133516
Iraq	630	666	665	691	718	1376	2035	2175	2250	2360	2395	2535	2635	2700	2610	3.249	1.63925	0.231914	0.03		0.03		0.0003	0.0603	0.0603	0.292214		Iraq	5.60765e-05	5.97001e-05	6.02413e-05	6.45238e-05	6.63889e-05	0.000123949	0.000186292	0.000143361	0.00016467	0.000176154	0.00018331	0.000192743	0.000194076	0.000204808	0.000209226		Iraq	0.000271747	0.000289307	0.00029193	0.000312683
Iran, Islamic Republic of	1166	1218	1225	1337	1454	1698	1935	2160	2395	2600	2735	3005	3675	4340	4610	1.695	0.855197	0.125064	0.03		0.01		0.0003	0.0403	0.0403	0.165364		Iran, Islamic Republic of	6.93627e-05	7.29686e-05	7.41646e-05	8.34374e-05	8.98511e-05	0.000102223	0.000118385	9.51507e-05	0.000117146	0.000129701	0.000139902	0.000152698	0.000180899	0.000220019	0.000246981		Iran, Islamic Republic of	0.000284618	0.000299414	0.000304321	0.000342371
Ireland	522	527	521	515	495	573	680	1635	1190	1220	1260	1345	1470	1545	1515	1.5	0.756811	0.0113288	0.00141037	0.000200032	0.000962482	0.000135415	0.0003	0.0030083	0.00317552	0.0143371		Ireland	2.44685e-06	2.48776e-06	2.48547e-06	2.53248e-06	2.41032e-06	2.71816e-06	3.27821e-06	5.67526e-06	4.58646e-06	4.79555e-06	5.07864e-06	5.38544e-06	5.70172e-06	6.17176e-06	6.39567e-06		Ireland	1.10473e-05	1.1232e-05	1.12216e-05	1.14339e-05
Iceland	83	84	87	83	79	71	65	65	35	30	25	25	25	25	25	1.59	0.80222	0	0.001				0.0003	0.0013	0.0013	0.0013		Iceland	1.59274e-07	1.62333e-07	1.6991e-07	1.67088e-07	1.5748e-07	1.37882e-07	1.28283e-07	9.23655e-08	5.52238e-08	4.82757e-08	4.12521e-08	4.09795e-08	3.96969e-08	4.08836e-08	4.32058e-08		Iceland	1.59274e-07	1.62333e-07	1.6991e-07	1.67088e-07
Israel	808	883	921	994	1121	1234	1325	1440	1485	1480	1420	1305	1295	1355	1360	2.85	1.43794	0.0591	0.005				0.0003	0.0053	0.0053	0.0644		Israel	6.32135e-06	6.95697e-06	7.33315e-06	8.15806e-06	9.11036e-06	9.77006e-06	1.06612e-05	8.34241e-06	9.55251e-06	9.7096e-06	9.55271e-06	8.72107e-06	8.38338e-06	9.03402e-06	9.58237e-06		Israel	7.68104e-05	8.45338e-05	8.91047e-05	9.91281e-05
Italy	4481	4524	4594	4575	4418	5369	6285	13795	11360	11475	11720	11885	12175	12570	12270	1.2	0.605449	0.00568991	0.0319977	0.000175553	0.00223009	7.49446e-05	0.0003	0.0347783	0.0348457	0.0404682		Italy	0.000230487	0.000234345	0.000240489	0.000246868	0.000236064	0.000279479	0.000332481	0.000525441	0.000480444	0.000494955	0.000518369	0.000522194	0.000518193	0.000550999	0.000568397		Italy	0.000267677	0.000272157	0.000279293	0.000286701
Jamaica	43	39	40	34	39	41	25	20	25	20	25	25	20	25	25	1.358	0.685166	0.251775	0.01	0.04	0.11		0.0003	0.1603	0.1603	0.412075		Jamaica	1.01748e-05	9.29355e-06	9.63272e-06	8.43989e-06	9.58632e-06	9.81801e-06	6.08395e-06	3.50442e-06	4.86395e-06	3.96851e-06	5.0867e-06	5.05309e-06	3.91595e-06	5.04126e-06	5.3276e-06		Jamaica	2.61558e-05	2.38905e-05	2.47623e-05	2.1696e-05
Japan	1421	1587	1587	1653	1654	1682	1770	1880	1925	2045	1935	1870	1850	1880	1855	1.2	0.605449	0	0.00075				0.0003	0.00105	0.00105	0.00105		Japan	2.20245e-06	2.47714e-06	2.50335e-06	2.68774e-06	2.66305e-06	2.63828e-06	2.82147e-06	2.15775e-06	2.45321e-06	2.65795e-06	2.57889e-06	2.47579e-06	2.37266e-06	2.48321e-06	2.58935e-06		Japan	2.20245e-06	2.47714e-06	2.50335e-06	2.68774e-06
Yemen	78	77	81	109	135	170	180	210	270	340	350	360	415	445	445	4.59	2.31584	0.556721	0.0236		0.0095		0.0003	0.0334	0.0334	0.590121		Yemen	3.8456e-06	3.82315e-06	4.06431e-06	5.63764e-06	6.91408e-06	8.48206e-06	9.12707e-06	7.66688e-06	1.09452e-05	1.40569e-05	1.4838e-05	1.51612e-05	1.69304e-05	1.8697e-05	1.9759e-05		Yemen	6.79452e-05	6.75485e-05	7.18095e-05	9.96076e-05
Jordan	306	324	325	353	353	384	410	430	455	495	475	525	585	635	625	2.639	1.33148	0.240555	0.035		0.0022		0.0003	0.0375	0.0375	0.278055		Jordan	1.69385e-05	1.80618e-05	1.83092e-05	2.04989e-05	2.02983e-05	2.15114e-05	2.33414e-05	1.7626e-05	2.07089e-05	2.29774e-05	2.26093e-05	2.48241e-05	2.67954e-05	2.99551e-05	3.1158e-05		Jordan	0.000125596	0.000133924	0.000135759	0.000151995
Yugoslavia, Federal Republic of (April 27, 1992-February 4, 2003)	2311	2159	1954	1848	1791	1723	1675	1655	1595	1460	1360	1260	1130	1045	815	n.a.												Yugoslavia, Federal Republic of (April 27, 1992-February 4, 2003)																	Yugoslavia, Federal Republic of (April 27, 1992-February 4, 2003)
Yugoslavia, Socialist Federal Republic (until 04/26/1992)	0	0	0	0	0	0	0	0	0	0	0	0	0	0	0	n.a.												Yugoslavia, Socialist Federal Republic (until 04/26/1992)																	Yugoslavia, Socialist Federal Republic (until 04/26/1992)
Cambodia	47	51	53	51	52	51	35	50	40	60	65	70	70	75	100	2.579	1.30121	0.4228	0.03			0.3	0.0003	0.3303	0.343876	0.7531		Cambodia	2.38574e-05	2.60709e-05	2.738e-05	2.71579e-05	2.74195e-05	2.61986e-05	1.82718e-05	1.87942e-05	1.66946e-05	2.55398e-05	2.83712e-05	3.03517e-05	2.94018e-05	3.24436e-05	4.57151e-05		Cambodia	5.22484e-05	5.70961e-05	5.99631e-05	5.94768e-05
Cameroon	548	599	654	658	702	738	780	805	870	1005	1085	1160	1250	1350	1435	4.322	2.18063	0.406346	0.002	0.003	0.2		0.0003	0.2053	0.2053	0.611646		Cameroon	0.00016607	0.00018281	0.000201707	0.000209189	0.000220994	0.000226335	0.000243106	0.00018065	0.000216782	0.000255399	0.000282736	0.000300283	0.000313453	0.000348649	0.000391651		Cameroon	0.00049477	0.000544641	0.000600942	0.000623233
Canada	653	732	794	895	917	1060	1170	1270	1385	1530	1415	1440	1510	1560	1550	1.26	0.635721	0.0408197	0.00503104	0.000969899	0.00475696	0.00246564	0.000299766	0.0135233	0.0152271	0.054343		Canada	1.46776e-05	1.65696e-05	1.81633e-05	2.11041e-05	2.14112e-05	2.41119e-05	2.70469e-05	2.11386e-05	2.55967e-05	2.88386e-05	2.73487e-05	2.76481e-05	2.80847e-05	2.9882e-05	3.13768e-05		Canada	5.23817e-05	5.91342e-05	6.48216e-05	7.53167e-05
Kazakhstan	718	703	678	658	687	667	690	710	730	745	750	785	810	855	870	3.012	1.51968	0.0687378	0.00075				0.0003	0.00105	0.00105	0.0697878		Kazakhstan	1.11285e-06	1.09731e-06	1.06948e-06	1.06989e-06	1.10611e-06	1.04622e-06	1.09989e-06	8.14893e-07	9.30309e-07	9.68299e-07	9.99569e-07	1.0393e-06	1.03884e-06	1.12933e-06	1.21441e-06		Kazakhstan	7.39651e-05	7.29321e-05	7.10829e-05	7.11099e-05
Qatar	3	3	7	13	23	32	10	0	5	0	0	5	5	5	5	1.729	0.872351	0.231914	0.03		0.03		0.0003	0.0603	0.0603	0.292214		Qatar	2.67031e-07	2.68919e-07	6.34119e-07	1.21391e-06	2.12666e-06	2.88253e-06	9.1544e-07	0	3.65934e-07	0	0	3.80164e-07	3.68265e-07	3.79274e-07	4.00816e-07		Qatar	1.29403e-06	1.30318e-06	3.07294e-06	5.8826e-06
Kenya	451	460	493	503	503	532	570	585	615	635	655	690	765	810	855	3.208	1.61857	0.406911	0.0015		0.1666		0.0003	0.1684	0.1684	0.575311		Kenya	0.000112109	0.000115155	0.000124722	0.00013117	0.000129886	0.000133832	0.000145723	0.000107684	0.000125699	0.000132367	0.000140006	0.000146513	0.000157354	0.00017159	0.000191411		Kenya	0.000383003	0.000393409	0.000426094	0.000448121
Kyrgyzstan	223	229	221	217	228	217	200	215	225	245	235	250	265	285	290	2.7	1.36226	0.0678496	0.00075				0.0003	0.00105	0.00105	0.0688996		Kyrgyzstan	3.45634e-07	3.57444e-07	3.48608e-07	3.52837e-07	3.67095e-07	3.40373e-07	3.1881e-07	2.46763e-07	2.86739e-07	3.18434e-07	3.13198e-07	3.30988e-07	3.39867e-07	3.76444e-07	4.04805e-07		Kyrgyzstan	2.26801e-05	2.3455e-05	2.28752e-05	2.31526e-05
Kiribati	0	0	0	0	0	0	0	0	0	0	0	0	0	0	0	3.147	1.58779	0.0199	0.00075				0.0003	0.00105	0.00105	0.02095		Kiribati	0	0	0	0	0	0	0	0	0	0	0	0	0	0	0		Kiribati	0	0	0	0
Colombia	498	533	572	627	648	720	780	865	990	1120	1180	1240	1410	1550	1530	1.645	0.82997	0.0759438	0.00860084	0.0254645	0.0328902	0.000187691	0.0003	0.0674432	0.0701326	0.143387		Colombia	5.15552e-05	5.55688e-05	6.02659e-05	6.80945e-05	6.96866e-05	7.54325e-05	8.30476e-05	6.63116e-05	8.42695e-05	9.72304e-05	0.000105042	0.000109654	0.000120785	0.000136747	0.000142649		Colombia	0.000105405	0.000113611	0.000123214	0.00013922
Comoros	0	0	0	0	0	0	0	0	0	0	0	0	0	0	0	3.878	1.95661	0.234375	0.01		0.008		0.0003	0.0183	0.0183	0.252675		Comoros	0	0	0	0	0	0	0	0	0	0	0	0	0	0	0		Comoros	0	0	0	0
Congo, Democratic Republic	109	112	116	117	119	123	100	100	110	115	115	125	145	145	130	6.051	3.05298	0.690864	0.00075		0.186		0.0003	0.18705	0.18705	0.877914		Congo, Democratic Republic	3.00959e-05	3.11429e-05	3.25965e-05	3.38897e-05	3.41318e-05	3.43692e-05	2.83968e-05	2.04461e-05	2.49727e-05	2.66268e-05	2.73035e-05	2.94816e-05	3.31283e-05	3.41186e-05	3.23265e-05		Congo, Democratic Republic	0.000141254	0.000146168	0.000152991	0.00015906
Congo, Republic	41	41	43	46	43	42	20	30	20	25	15	15	25	30	25	4.157	2.09738	0.690864	0.00075		0.251		0.0003	0.25205	0.25205	0.942914		Congo, Republic	1.52543e-05	1.53622e-05	1.62821e-05	1.79543e-05	1.66192e-05	1.5814e-05	7.65295e-06	8.26535e-06	6.11832e-06	7.79993e-06	4.79888e-06	4.76718e-06	7.69662e-06	9.51204e-06	8.37693e-06		Congo, Republic	5.70662e-05	5.74698e-05	6.0911e-05	6.71668e-05
Korea, Democratic People's Republic	37	36	38	38	34	32	10	10	5	0	0	0	0	0	0	1.78	0.898083	0	0.00075				0.0003	0.00105	0.00105	0.00105		Korea, Democratic People's Republic	5.73474e-08	5.61921e-08	5.99416e-08	6.1787e-08	5.47422e-08	5.01933e-08	1.59405e-08	1.14774e-08	6.37198e-09	0	0	0	0	0	0		Korea, Democratic People's Republic	5.73474e-08	5.61921e-08	5.99416e-08	6.1787e-08
Korea, Republic	1589	1649	1714	1673	1693	1845	2055	2185	2360	2495	2405	2325	2405	2545	2600	0.721	0.363774	0	0.00075				0.0003	0.00105	0.00105	0.00105		Korea, Republic	2.46284e-06	2.57391e-06	2.70368e-06	2.72026e-06	2.72584e-06	2.89396e-06	3.27577e-06	2.50781e-06	3.00758e-06	3.24283e-06	3.20528e-06	3.07819e-06	3.08445e-06	3.36158e-06	3.62928e-06		Korea, Republic	2.46284e-06	2.57391e-06	2.70368e-06	2.72026e-06
Kosovo	862	1059	1253	1364	1467	1666	1570	1550	1550	1505	1560	1640	1740	1835	1865	1.545	0.779516											Kosovo																	Kosovo
Croatia	2254	2286	2289	2388	2323	2265	2435	4215	3960	4045	4040	3990	3970	3850	3565	1.46	0.73663	0.0198911	0.005				0.0003	0.0053	0.0053	0.0251911		Croatia	1.76341e-05	1.80109e-05	1.82254e-05	1.9599e-05	1.8879e-05	1.79329e-05	1.95924e-05	2.44189e-05	2.54734e-05	2.65374e-05	2.71781e-05	2.66644e-05	2.57004e-05	2.56686e-05	2.51185e-05		Croatia	8.38153e-05	8.56065e-05	8.6626e-05	9.31549e-05
Cuba	473	455	452	447	422	411	405	405	390	405	350	345	345	345	330	1.439	0.726034	0.251775	0.005	0.017	0.083		0.0003	0.1053	0.1053	0.357075		Cuba	7.35211e-05	7.12235e-05	7.15027e-05	7.28887e-05	6.81388e-05	6.46512e-05	6.47434e-05	4.66162e-05	4.98435e-05	5.27895e-05	4.67798e-05	4.58069e-05	4.43732e-05	4.56997e-05	4.61956e-05		Cuba	0.000249312	0.000241521	0.000242467	0.000247168
Kuwait	12	12	10	15	49	133	255	220	215	200	190	190	195	190	165	1.524	0.76892	0.23198	0.00075		0.04		0.0003	0.04105	0.04105	0.27303		Kuwait	7.27138e-07	7.32281e-07	6.16692e-07	9.53518e-07	3.08435e-06	8.15588e-06	1.58915e-05	9.87163e-06	1.07119e-05	1.01627e-05	9.89986e-06	9.83446e-06	9.77735e-06	9.81144e-06	9.00441e-06		Kuwait	4.83631e-06	4.87051e-06	4.10171e-06	6.34199e-06
Laos, People's Democratic Republic	39	35	33	32	33	32	30	30	25	35	35	40	40	40	40	2.421	1.22149	0.407512	0.0204	0	0	0.272	0.0003	0.2927	0.301158	0.700212		Laos, People's Democratic Republic	1.73373e-05	1.56692e-05	1.49301e-05	1.49234e-05	1.52392e-05	1.43963e-05	1.3716e-05	9.87571e-06	9.13796e-06	1.30475e-05	1.3379e-05	1.51893e-05	1.47139e-05	1.51537e-05	1.60145e-05		Laos, People's Democratic Republic	4.03104e-05	3.64319e-05	3.47135e-05	3.4698e-05
Lesotho	4	4	4	5	3	7	0	0	0	0	0	0	0	0	0	2.694	1.35923	0.12448	0.00075				0.0003	0.00105	0.00105	0.12553		Lesotho	6.19972e-09	6.24357e-09	6.30964e-09	8.12987e-09	4.83019e-09	1.09798e-08	0	0	0	0	0	0	0	0	0		Lesotho	7.41194e-07	7.46437e-07	7.54336e-07	9.7195e-07
Latvia	607	655	693	688	669	772	890	1970	1610	1565	1585	1490	1490	1480	1375	1.36	0.686176	0	0.001				0.0003	0.0013	0.0013	0.0013		Latvia	1.16481e-06	1.26581e-06	1.35342e-06	1.38502e-06	1.33359e-06	1.49923e-06	1.75649e-06	2.79939e-06	2.5403e-06	2.51838e-06	2.61538e-06	2.44238e-06	2.36594e-06	2.42031e-06	2.37632e-06		Latvia	1.16481e-06	1.26581e-06	1.35342e-06	1.38502e-06
Lebanon	2005	2025	2025	2098	2085	2139	2195	2225	2225	2255	2205	2230	2300	2410	2455	2.239	1.12967	0.0296036	0.03		0.01		0.0003	0.0403	0.0403	0.0699036		Lebanon	0.000119273	0.000121315	0.000122599	0.000130929	0.000128844	0.000128772	0.000134293	9.8014e-05	0.00010883	0.00011249	0.000112791	0.000113317	0.000113216	0.000122177	0.000131527		Lebanon	0.000206889	0.00021043	0.000212657	0.000227107
Liberia	15	15	12	11	9	9	0	5	5	5	5	5	5	5	5	3.95	1.99294	0.406628	0.077	0.009	0.055		0.0003	0.1413	0.1413	0.547928		Liberia	3.12864e-06	3.15077e-06	2.54729e-06	2.40691e-06	1.95002e-06	1.89973e-06	0	7.72263e-07	8.57487e-07	8.74533e-07	8.96756e-07	8.90832e-07	8.6295e-07	8.88747e-07	9.39227e-07		Liberia	1.21322e-05	1.2218e-05	9.87781e-06	9.33342e-06
Libya	214	220	388	649	760	719	705	665	620	635	625	530	600	620	625	2.355	1.18819	0.345434	0.003	0.002	0.02		0.0003	0.0253	0.0253	0.370734		Libya	7.99203e-06	8.27422e-06	1.47471e-05	2.54267e-05	2.94841e-05	2.71741e-05	2.70783e-05	1.83906e-05	1.90383e-05	1.98865e-05	2.00707e-05	1.69075e-05	1.85415e-05	1.97323e-05	2.10213e-05		Libya	0.000117111	0.000121246	0.000216097	0.00037259
Liechtenstein	13	12	13	15	12	11	0	0	0	0	0	0	0	0	0	1.45	0.731584	0	0.001				0.0003	0.0013	0.0013	0.0013		Liechtenstein	2.49465e-08	2.31904e-08	2.53888e-08	3.01967e-08	2.3921e-08	2.1362e-08	0	0	0	0	0	0	0	0	0		Liechtenstein	2.49465e-08	2.31904e-08	2.53888e-08	3.01967e-08
Lithuania	685	691	727	716	695	789	885	1860	1590	1615	1590	1550	1545	1530	1410	1.18	0.595358	0	0.001				0.0003	0.0013	0.0013	0.0013		Lithuania	1.31449e-06	1.33538e-06	1.41982e-06	1.44139e-06	1.38542e-06	1.53224e-06	1.74662e-06	2.64307e-06	2.50874e-06	2.59884e-06	2.62363e-06	2.54073e-06	2.45327e-06	2.50208e-06	2.4368e-06		Lithuania	1.31449e-06	1.33538e-06	1.41982e-06	1.44139e-06
Luxembourg	126	125	119	118	116	159	215	510	420	460	465	470	500	530	525	1.25	0.630676	0.0163591	0.00471612	0.000117695	0.00144637	1.38947e-05	0.0003	0.00659408	0.00676816	0.0229532		Luxembourg	1.25882e-06	1.25766e-06	1.20996e-06	1.23674e-06	1.20388e-06	1.60758e-06	2.20913e-06	3.77306e-06	3.45012e-06	3.85383e-06	3.99471e-06	4.01099e-06	4.13346e-06	4.51245e-06	4.72376e-06		Luxembourg	4.26911e-06	4.26518e-06	4.10342e-06	4.19421e-06
Macau	0	0	0	0	0	0	0	0	0	0	0	0	0	0	0	0.586	0.295661	0.201389	0.03				0.0003	0.0303	0.07727	0.231689		Macau	0	0	0	0	0	0	0	0	0	0	0	0	0	0	0		Macau	0	0	0	0
Madagascar	33	36	29	33	31	35	30	30	40	40	45	50	70	75	90	3.972	2.00404	0.359148	0.0015		0.11695		0.0003	0.11875	0.11875	0.477898		Madagascar	5.78458e-06	6.35508e-06	5.17355e-06	6.06839e-06	5.64483e-06	6.20882e-06	5.4084e-06	3.89412e-06	5.76515e-06	5.87975e-06	6.78281e-06	7.48667e-06	1.01533e-05	1.12037e-05	1.42081e-05		Madagascar	2.32794e-05	2.55754e-05	2.08204e-05	2.44216e-05
Malawi	11	12	14	12	12	8	0	0	0	0	0	0	0	0	0	3.648	1.84057	0.381308	0.0015	0	0.049	0	0.0003	0.0508	0.0508	0.432108		Malawi	8.24858e-07	9.0621e-07	1.06843e-06	9.43994e-07	9.34757e-07	6.07099e-07	0	0	0	0	0	0	0	0	0		Malawi	7.0163e-06	7.70828e-06	9.08816e-06	8.02968e-06
Malaysia	107	106	102	108	98	107	115	125	150	165	170	195	235	265	255	1.55	0.782038	0.264308	0.0165802	0	0	0.0550568	0.0003	0.071937	0.0877329	0.336245		Malaysia	1.3857e-05	1.38246e-05	1.34437e-05	1.46727e-05	1.31839e-05	1.40234e-05	1.5317e-05	1.19874e-05	1.59724e-05	1.79189e-05	1.8931e-05	2.15715e-05	2.51828e-05	2.92465e-05	2.97414e-05		Malaysia	5.31082e-05	5.2984e-05	5.15241e-05	5.62346e-05
Maldives	0	0	0	1	2	2	0	0	0	0	0	0	0	0	0	1.575	0.794652	0.496	0.1734		0.0014	0.0097	0.003	0.1875	0.1875	0.6835		Maldives	0	0	0	2.90353e-07	5.75023e-07	5.60193e-07	0	0	0	0	0	0	0	0	0		Maldives	0	0	0	1.05843e-06
Mali	9	8	10	11	15	15	10	5	5	5	10	10	10	10	15	5.614	2.83249	0.357751	0.00288849	0.0856586	0.147578		0.0003	0.236426	0.236426	0.594176		Mali	3.14094e-06	2.81169e-06	3.55181e-06	4.02728e-06	5.438e-06	5.29775e-06	3.58928e-06	1.29216e-06	1.43476e-06	1.46328e-06	3.00094e-06	2.98111e-06	2.88781e-06	2.97413e-06	4.71459e-06		Mali	7.8937e-06	7.06625e-06	8.92628e-06	1.01212e-05
Malta	12	14	14	14	12	20	10	20	10	5	20	35	45	45	35	1.06	0.534813	0	0.03				0.0003	0.0303	0.0303	0.0303		Malta	5.36718e-07	6.30601e-07	6.37274e-07	6.56894e-07	5.57542e-07	9.05271e-07	4.59997e-07	6.62408e-07	3.67754e-07	1.87533e-07	7.69192e-07	1.33719e-06	1.66544e-06	1.71522e-06	1.40984e-06		Malta	5.36718e-07	6.30601e-07	6.37274e-07	6.56894e-07
Morocco	470	495	504	535	537	575	630	645	680	715	760	790	925	975	1010	2.23	1.12513	0.345434	0.03	0.01	0.015		0.0003	0.0553	0.0553	0.400734		Morocco	3.83659e-05	4.06925e-05	4.18708e-05	4.58145e-05	4.55358e-05	4.75006e-05	5.28905e-05	3.89886e-05	4.56404e-05	4.89435e-05	5.33459e-05	5.50853e-05	6.24799e-05	6.78259e-05	7.42514e-05		Morocco	0.00027802	0.000294879	0.000303418	0.000331997
Marshall Islands	0	0	0	0	0	0	0	0	0	0	0	0	0	0	0	2.919	1.47275	0.0199	0.00075				0.0003	0.00105	0.00105	0.02095		Marshall Islands	0	0	0	0	0	0	0	0	0	0	0	0	0	0	0		Marshall Islands	0	0	0	0
Mauritania	8	7	6	6	6	8	5	0	0	0	0	0	0	5	0	4.697	2.36983	0.356592	0.00075	0.012	0.058		0.0003	0.07105	0.07105	0.427642		Mauritania	8.39029e-07	7.39343e-07	6.40429e-07	6.60146e-07	6.53686e-07	8.49103e-07	5.3932e-07	0	0	0	0	0	0	4.46889e-07	0		Mauritania	5.05002e-06	4.45002e-06	3.85467e-06	3.97334e-06
Mauritius	25	23	22	24	23	25	25	20	20	30	20	40	45	45	40	1.39	0.701312	0.238313	0.0358908	0	0.0124892	0.00608871	0.0003	0.0547687	0.0587758	0.293081		Mauritius	2.16901e-06	2.0096e-06	1.94257e-06	2.18441e-06	2.07291e-06	2.19505e-06	2.23075e-06	1.28494e-06	1.42674e-06	2.18265e-06	1.49208e-06	2.96444e-06	3.23061e-06	3.32718e-06	3.12548e-06		Mauritius	1.08156e-05	1.00207e-05	9.68648e-06	1.08924e-05
Mexico	487	532	546	570	588	653	710	800	870	950	990	1105	1285	1470	1485	1.91	0.963673	0	0.00175	0.000505	0.00277		0.0003	0.005325	0.005325	0.005325		Mexico	3.82799e-06	4.21129e-06	4.36785e-06	4.70023e-06	4.80121e-06	5.19444e-06	5.73972e-06	4.65653e-06	5.62282e-06	6.26192e-06	6.6914e-06	7.41934e-06	8.35788e-06	9.84697e-06	1.05125e-05		Mexico	3.82799e-06	4.21129e-06	4.36785e-06	4.70023e-06
Micronesia, Federated States of	0	0	0	0	0	0	0	0	0	0	0	0	0	0	0	2.748	1.38648	0.0199	0.00075				0.0003	0.00105	0.00105	0.02095		Micronesia, Federated States of	0	0	0	0	0	0	0	0	0	0	0	0	0	0	0		Micronesia, Federated States of	0	0	0	0
Moldova, Republic of	456	453	442	443	512	981	1260	865	940	1085	1230	1820	2450	2145	2060	1.731	0.87336	0	0.001				0.0003	0.0013	0.0013	0.0013		Moldova, Republic of	8.75046e-07	8.75438e-07	8.63219e-07	8.91808e-07	1.02063e-06	1.9051e-06	2.48672e-06	1.22917e-06	1.48315e-06	1.74597e-06	2.0296e-06	2.98331e-06	3.8903e-06	3.50781e-06	3.56015e-06		Moldova, Republic of	8.75046e-07	8.75438e-07	8.63219e-07	8.91808e-07
Monaco	0	0	0	0	0	0	0	0	0	0	0	0	0	0	0	2.11	1.06458	0	0.001				0.0003	0.0013	0.0013	0.0013		Monaco	0	0	0	0	0	0	0	0	0	0	0	0	0	0	0		Monaco	0	0	0	0
Mongolia	754	747	714	708	691	678	700	680	640	635	610	615	615	630	620	2.7	1.36226	0	0.00075				0.0003	0.00105	0.00105	0.00105		Mongolia	1.16865e-06	1.16599e-06	1.12627e-06	1.15119e-06	1.11255e-06	1.06347e-06	1.11583e-06	7.80461e-07	8.15614e-07	8.25329e-07	8.12983e-07	8.14232e-07	7.88748e-07	8.32139e-07	8.65444e-07		Mongolia	1.16865e-06	1.16599e-06	1.12627e-06	1.15119e-06
Montenegro (from June 3, 2006)	29	37	49	58	63	68	70	80	90	110	110	125	145	165	185	1.74	0.877901	0.0198911	0.0025				0.0003	0.0028	0.0028	0.0226911		Montenegro (from June 3, 2006)	1.19861e-07	1.54008e-07	2.06115e-07	2.51484e-07	2.70491e-07	2.84429e-07	2.97556e-07	2.44851e-07	3.05855e-07	3.81254e-07	3.90943e-07	4.41318e-07	4.95906e-07	5.81176e-07	6.88633e-07		Montenegro (from June 3, 2006)	9.71351e-07	1.24808e-06	1.67035e-06	2.03802e-06
Mozambique	113	118	125	124	115	121	120	125	115	125	125	120	110	115	130	4.763	2.40313	0.359659	0.026		0.028		0.0003	0.0543	0.0543	0.413959		Mozambique	9.05735e-06	9.52501e-06	1.01968e-05	1.04267e-05	9.57528e-06	9.81502e-06	9.89221e-06	7.4193e-06	7.57902e-06	8.40183e-06	8.61533e-06	8.21608e-06	7.29569e-06	7.85531e-06	9.38429e-06		Mozambique	6.90492e-05	7.26145e-05	7.77361e-05	7.94884e-05
Myanmar	14	12	12	10	13	10	0	0	0	0	0	0	5	35	55	2.115	1.0671	0.368154	0.0224217	0	0	0.24896	0.0003	0.271681	0.273608	0.639835		Myanmar	5.65431e-06	4.88083e-06	4.93248e-06	4.23695e-06	5.45414e-06	4.08729e-06	0	0	0	0	0	0	1.67099e-06	1.20466e-05	2.00055e-05		Myanmar	1.32227e-05	1.14139e-05	1.15347e-05	9.90815e-06
Namibia	17	19	19	24	25	24	5	0	5	5	10	10	25	30	30	3.212	1.62059	0.125451	0.00075		0.02		0.0003	0.02105	0.02105	0.146501		Namibia	5.28231e-07	5.94551e-07	6.00843e-07	7.82326e-07	8.06949e-07	7.54692e-07	1.59784e-07	0	1.27743e-07	1.30282e-07	2.67186e-07	2.65421e-07	6.42785e-07	7.944e-07	8.39521e-07		Namibia	3.67632e-06	4.13789e-06	4.18168e-06	5.44474e-06
Nauru	0	0	0	0	0	0	0	0	0	0	0	0	0	0	0	3.331	1.68063	0.0199	0.00075				0.0003	0.00105	0.00105	0.02095		Nauru	0	0	0	0	0	0	0	0	0	0	0	0	0	0	0		Nauru	0	0	0	0
Nepal	76	97	107	117	158	193	220	240	270	280	285	320	385	450	455	1.984	1.00101	0.95976	0.01			0.03	0.0003	0.0403	0.0403	1.00006		Nepal	4.52107e-06	5.81113e-06	6.47805e-06	7.30156e-06	9.76374e-06	1.1619e-05	1.34598e-05	1.05723e-05	1.32064e-05	1.39678e-05	1.45785e-05	1.62607e-05	1.89513e-05	2.28131e-05	2.43767e-05		Nepal	0.000112192	0.000144205	0.000160755	0.000181191
New Zealand	122	147	180	213	206	251	295	340	340	385	325	305	300	320	325	1.56	0.787084	0.0295468	0.00293314	6.0606e-05	0.000801643	0.00226583	0.0003	0.00636123	0.00840607	0.035908		New Zealand	1.51383e-06	1.83694e-06	2.27311e-06	2.77266e-06	2.6553e-06	3.15191e-06	3.76468e-06	3.1241e-06	3.46886e-06	4.00606e-06	3.46768e-06	3.23278e-06	3.08027e-06	3.38383e-06	3.63191e-06		New Zealand	6.46658e-06	7.8468e-06	9.71001e-06	1.18439e-05
Nicaragua	32	33	38	40	40	35	20	25	30	35	40	40	55	40	40	2.218	1.11907	0.0215783	0.0012	0.0024	0.0096		0.0003	0.0135	0.0135	0.0350783		Nicaragua	6.37685e-07	6.62264e-07	7.70678e-07	8.36216e-07	8.28033e-07	7.05843e-07	4.09898e-07	3.68915e-07	4.91553e-07	5.84879e-07	6.85419e-07	6.80891e-07	9.06922e-07	6.79297e-07	7.1788e-07		Nicaragua	1.65696e-06	1.72082e-06	2.00252e-06	2.17282e-06
Netherlands	1080	1084	1063	1053	1025	1252	1450	3420	2400	2345	2305	2355	2395	2430	2330	1.43	0.721493	0.0487157	0.0041392	0.000931847	0.00462822	0.00071827	0.0003	0.0107175	0.0107865	0.0594332		Netherlands	1.7196e-05	1.73818e-05	1.72255e-05	1.75887e-05	1.69535e-05	2.0174e-05	2.37445e-05	4.03238e-05	3.14202e-05	3.13104e-05	3.15584e-05	3.203e-05	3.15545e-05	3.29727e-05	3.34115e-05		Netherlands	9.47493e-05	9.57728e-05	9.49113e-05	9.69131e-05
Niger	3	4	2	3	3	3	0	0	0	0	0	0	0	0	5	6.061	3.05802	0.403328	0.022	0.06	0.201		0.0003	0.2833	0.2833	0.686628		Niger	1.25456e-06	1.68457e-06	8.51201e-07	1.31611e-06	1.30323e-06	1.26962e-06	0	0	0	0	0	0	0	0	1.88311e-06		Niger	3.04064e-06	4.08286e-06	2.06304e-06	3.18983e-06
Nigeria	397	453	494	566	602	647	730	810	885	970	1035	1130	1465	1590	1675	4.482	2.26135	0.501203	0.005	0.045	0.244		0.0003	0.2943	0.2943	0.795503		Nigeria	0.000172466	0.000198186	0.00021841	0.000257947	0.000271669	0.000284447	0.000326156	0.000260572	0.000316118	0.000353367	0.000386628	0.000419326	0.000526625	0.000588645	0.000655335		Nigeria	0.000466181	0.000535703	0.00059037	0.000697241
North Macedonia	1185	1262	1347	1276	1345	1452	1510	1585	1650	1790	1830	1925	2065	2170	2220	1.5	0.756811	0.120104	0.02				0.0003	0.0203	0.0203	0.140404		North Macedonia	3.55089e-05	3.80837e-05	4.10789e-05	4.01117e-05	4.1867e-05	4.4032e-05	4.65356e-05	3.51705e-05	4.06532e-05	4.49793e-05	4.7153e-05	4.92731e-05	5.12023e-05	5.54143e-05	5.99111e-05		North Macedonia	0.000245595	0.000263403	0.00028412	0.00027743
Norway	459	458	456	442	431	427	400	385	155	145	140	120	125	120	130	1.4	0.706357		0.00214691	8.30108e-05	0.000800059	0.000814528	0.0003	0.00414451	0.00439937	0.00414451		Norway	2.98075e-06	2.9953e-06	3.01378e-06	3.01119e-06	2.90751e-06	2.80624e-06	2.67155e-06	1.85142e-06	8.27633e-07	7.89628e-07	7.81774e-07	6.65665e-07	6.71698e-07	6.64107e-07	7.60313e-07		Norway	2.80807e-06	2.82178e-06	2.83918e-06	2.83674e-06
Oman	6	5	13	14	13	20	0	0	0	0	0	0	0	0	0	2.525	1.27397	0.887369	0.0329798	0	0.0798317	0	0.0003	0.113111	0.113111	1.00048		Oman	1.0018e-06	8.40737e-07	2.20905e-06	2.45222e-06	2.25478e-06	3.37943e-06	0	0	0	0	0	0	0	0	0		Oman	8.861e-06	7.43639e-06	1.95392e-05	2.16901e-05
Austria	2583	2557	2536	2484	2360	2619	2945	6280	4830	4725	4690	4670	4670	4685	4495	1.32	0.665994	0.00286129	0.00173354	4.39805e-05	0.000452966	1.18058e-05	0.0003	0.00254229	0.00260329	0.00540357		Austria	9.92591e-06	9.89549e-06	9.91808e-06	1.00138e-05	9.42083e-06	1.01851e-05	1.16391e-05	1.78705e-05	1.52611e-05	1.52261e-05	1.54974e-05	1.53293e-05	1.48496e-05	1.53426e-05	1.55565e-05		Austria	2.06029e-05	2.05398e-05	2.05867e-05	2.07853e-05
Pakistan	399	437	445	485	520	582	640	680	760	845	910	1105	1365	1770	2025	3.605	1.81887	0.151539	0.0455839	0	0.0018	0.0018	0.0003	0.0494839	0.0494839	0.201023		Pakistan	2.91447e-05	3.21462e-05	3.30811e-05	3.71647e-05	3.94568e-05	4.30223e-05	4.80791e-05	3.67812e-05	4.5645e-05	5.17589e-05	5.71568e-05	6.89462e-05	8.25031e-05	0.00011018	0.000133213		Pakistan	0.000118397	0.00013059	0.000134388	0.000150978
Palestinian Territories	0	0	0	11	67	137	95	75	70	70	50	90	145	175	220	3.311	1.67053	0.0294426	0.03		0.005		0.0003	0.0353	0.0353	0.0647426		Palestinian Territories	0	0	0	6.01301e-07	3.62663e-06	7.22439e-06	5.09109e-06	2.89394e-06	2.99908e-06	3.0587e-06	2.2403e-06	4.00591e-06	6.25196e-06	7.77103e-06	1.03242e-05		Palestinian Territories	0	0	0	1.10283e-06
Palau	0	0	0	0	0	0	0	0	0	0	0	0	0	0	0	1.907	0.962159	0.0199	0.00075				0.0003	0.00105	0.00105	0.02095		Palau	0	0	0	0	0	0	0	0	0	0	0	0	0	0	0		Palau	0	0	0	0
Panama	18	18	18	19	16	17	5	5	10	5	5	25	20	30	25	2.119	1.06912	0.0502036	0.0015	0.003	0.0225		0.0003	0.0273	0.0273	0.0775036		Panama	7.25367e-07	7.30498e-07	7.38228e-07	8.03232e-07	6.69787e-07	6.93294e-07	2.07226e-07	1.49206e-07	3.31343e-07	1.68965e-07	1.73259e-07	8.6057e-07	6.66908e-07	1.03027e-06	9.07321e-07		Panama	2.05929e-06	2.07385e-06	2.0958e-06	2.28034e-06
Papua New Guinea	4	4	4	4	3	2	0	0	0	0	0	0	0	0	0	3.099	1.56357	0.9639	0.035				0.0003	0.0353	0.0353	0.9992		Papua New Guinea	2.08429e-07	2.09903e-07	2.12124e-07	2.18655e-07	1.62386e-07	1.05466e-07	0	0	0	0	0	0	0	0	0		Papua New Guinea	5.89977e-06	5.9415e-06	6.00437e-06	6.18923e-06
Paraguay	35	34	36	36	35	36	10	10	10	10	15	25	25	30	30	2.422	1.222	0.021879	0.00075				0.0003	0.00105	0.00105	0.022929		Paraguay	5.42475e-08	5.30703e-08	5.67868e-08	5.85351e-08	5.63522e-08	5.64674e-08	1.59405e-08	1.14774e-08	1.2744e-08	1.29973e-08	1.99914e-08	3.30988e-08	3.20629e-08	3.96257e-08	4.18763e-08		Paraguay	1.18461e-06	1.1589e-06	1.24006e-06	1.27824e-06
Peru	548	528	521	518	487	483	490	500	555	550	535	575	630	665	675	1.98	0.998991	0.0198733	0.00075		0.01		0.0003	0.01105	0.01105	0.0309233		Peru	8.93852e-06	8.67321e-06	8.64879e-06	8.86373e-06	8.25173e-06	7.97289e-06	8.21998e-06	6.03928e-06	7.44338e-06	7.52296e-06	7.50375e-06	8.0115e-06	8.50308e-06	9.24378e-06	9.91572e-06		Peru	2.50143e-05	2.42719e-05	2.42035e-05	2.4805e-05
Philippines	527	528	520	532	517	542	570	620	705	765	860	965	1140	1315	1480	1.916	0.9667	0.215104	0.01			0.01	0.0003	0.0203	0.039488	0.235404		Philippines	3.07184e-05	3.09944e-05	3.08478e-05	3.25313e-05	3.13047e-05	3.19721e-05	3.41706e-05	2.67615e-05	3.37885e-05	3.7393e-05	4.31048e-05	4.80481e-05	5.49849e-05	6.53216e-05	7.76936e-05		Philippines	0.000183125	0.00018477	0.000183896	0.000193932
Poland	13565	13460	13428	13060	12619	13906	15015	29000	24040	23145	22740	22045	21725	21485	19740	1.158	0.584258	0	0.001				0.0003	0.0013	0.0013	0.0013		Poland	2.60307e-05	2.60119e-05	2.62247e-05	2.62912e-05	2.51549e-05	2.70055e-05	2.96334e-05	4.12092e-05	3.79309e-05	3.72447e-05	3.75229e-05	3.61357e-05	3.44966e-05	3.51354e-05	3.41153e-05		Poland	2.60307e-05	2.60119e-05	2.62247e-05	2.62912e-05
Portugal	771	762	778	784	767	938	1130	2365	1895	1890	1940	2035	2150	2220	2205	1.44	0.726539	0.00872703	0.0141976	6.77491e-05	0.00782135	2.43705e-05	0.000288389	0.0223994	0.0224303	0.0311265		Portugal	2.55277e-05	2.54082e-05	2.62162e-05	2.72317e-05	2.63805e-05	3.14299e-05	3.84791e-05	5.79854e-05	5.15892e-05	5.24759e-05	5.5233e-05	5.75549e-05	5.89042e-05	6.26402e-05	6.57508e-05		Portugal	3.54247e-05	3.52589e-05	3.63802e-05	3.77894e-05
Rwanda	10	13	14	16	14	15	5	0	5	5	5	5	15	30	40	3.698	1.86579	0.4071	0.00075		0.04		0.0003	0.04105	0.04105	0.44815		Rwanda	6.05949e-07	7.93305e-07	8.63369e-07	1.01709e-06	8.81242e-07	9.19836e-07	3.11599e-07	0	2.49114e-07	2.54066e-07	2.60523e-07	2.58801e-07	7.52104e-07	1.54917e-06	2.18289e-06		Rwanda	6.61525e-06	8.66065e-06	9.42555e-06	1.11037e-05
Romania	1281	1363	1519	1494	1440	2560	3605	8520	7920	8130	8495	8780	9200	9590	9390	1.71	0.862765	0.097405	0.01				0.0003	0.0103	0.0103	0.107705		Romania	1.94764e-05	2.08697e-05	2.35045e-05	2.38294e-05	2.27433e-05	3.93898e-05	5.63709e-05	9.59246e-05	9.90097e-05	0.000103655	0.000111061	0.000114029	0.000115744	0.000124257	0.000128576		Romania	0.000203661	0.00021823	0.000245781	0.000249179
Russian Federation	6992	7305	7708	7920	8240	8613	9160	9565	10020	10500	10855	11305	12895	14775	14575	1.41	0.711403	0	0.001				0.0003	0.0013	0.0013	0.0013		Russian Federation	1.34174e-05	1.41172e-05	1.50536e-05	1.59438e-05	1.64257e-05	1.67265e-05	1.8078e-05	1.35919e-05	1.58098e-05	1.68965e-05	1.79116e-05	1.85309e-05	2.04757e-05	2.41622e-05	2.5189e-05		Russian Federation	1.34174e-05	1.41172e-05	1.50536e-05	1.59438e-05
Solomon Islands	0	0	0	0	0	0	0	0	0	0	0	0	0	0	0	3.557	1.79465	0.351975	0.00075				0.0003	0.00105	0.00105	0.353025		Solomon Islands	0	0	0	0	0	0	0	0	0	0	0	0	0	0	0		Solomon Islands	0	0	0	0
Zambia	23	26	26	28	36	43	20	20	20	20	20	20	25	25	30	4.101	2.06912	0.406157	0.0015	0.006	0.176		0.0003	0.1838	0.1838	0.589957		Zambia	6.24016e-06	7.10399e-06	7.17917e-06	7.96944e-06	1.01462e-05	1.18065e-05	5.58069e-06	4.01817e-06	4.4616e-06	4.55029e-06	4.66593e-06	4.6351e-06	5.61254e-06	5.78031e-06	7.33035e-06		Zambia	2.00295e-05	2.28022e-05	2.30435e-05	2.55801e-05
Samoa	1	2	2	2	1	1	0	0	0	0	0	0	0	0	0	3.829	1.93189	0.1664	0.00075				0.0003	0.00105	0.00105	0.16745		Samoa	1.54993e-09	3.12178e-09	3.15482e-09	3.25195e-09	1.61006e-09	1.56854e-09	0	0	0	0	0	0	0	0	0		Samoa	2.47177e-07	4.9785e-07	5.03119e-07	5.18609e-07
San Marino	0	0	1	1	1	1	0	0	0	0	0	0	0	0	0	1.149	0.579717	0	0.001				0.0003	0.0013	0.0013	0.0013		San Marino	0	0	1.95298e-09	2.01311e-09	1.99341e-09	1.942e-09	0	0	0	0	0	0	0	0	0		San Marino	0	0	1.95298e-09	2.01311e-09
Sao Tome and Principe	2	1	1	1	0	0	0	0	0	0	0	0	0	0	0	3.644	1.83855	0.6864	0.00075	0.021	0.18		0.0003	0.20205	0.20205	0.88845		Sao Tome and Principe	5.96501e-07	3.0036e-07	3.03539e-07	3.12884e-07	0	0	0	0	0	0	0	0	0	0	0		Sao Tome and Principe	2.62292e-06	1.32074e-06	1.33471e-06	1.37581e-06
Saudi Arabia	95	121	112	163	261	350	355	350	345	370	350	315	335	330	330	2.28	1.15035	0.460611	0.067445	0	0.0986605	0	0.0003	0.166406	0.166406	0.627016		Saudi Arabia	2.33353e-05	2.99321e-05	2.79989e-05	4.2003e-05	6.65982e-05	8.70046e-05	8.96827e-05	6.36633e-05	6.9679e-05	7.62138e-05	7.39262e-05	6.6094e-05	6.80905e-05	6.90793e-05	7.30029e-05		Saudi Arabia	8.79276e-05	0.000112784	0.0001055	0.000158267
Sweden	1030	1040	1057	1038	1006	1152	1310	3010	1950	1870	1855	1830	1830	1845	1730	1.45	0.731584		0.00282157	0.00010914	0.00119547	0.000817622	0.0003	0.00524381	0.00554404	0.00524381		Sweden	8.42919e-06	8.57123e-06	8.80352e-06	8.91144e-06	8.5522e-06	9.5408e-06	1.10258e-05	1.82409e-05	1.31213e-05	1.28331e-05	1.30537e-05	1.27927e-05	1.23923e-05	1.28673e-05	1.27506e-05		Sweden	7.97272e-06	8.10706e-06	8.32678e-06	8.42885e-06
Switzerland	1751	1805	1842	1872	1858	1836	1855	1815	1255	1255	1175	1155	1130	1085	1070	1.33	0.671039	0.0260508	0.00372122	0.000178243	0.00133222	0.000777803	0.0003	0.00630949	0.00662596	0.0323603		Switzerland	1.71261e-05	1.77791e-05	1.83355e-05	1.92079e-05	1.88777e-05	1.8173e-05	1.86597e-05	1.31455e-05	1.00927e-05	1.02933e-05	9.88209e-06	9.64971e-06	9.14536e-06	9.04366e-06	9.42521e-06		Switzerland	8.36414e-05	8.68307e-05	8.95484e-05	9.38087e-05
Senegal	47	47	45	53	59	59	50	50	55	80	80	90	95	120	125	3.818	1.92634	0.206852	0.004	0.017	0.127		0.0003	0.1483	0.1483	0.355152		Senegal	1.02887e-05	1.03615e-05	1.00256e-05	1.21714e-05	1.34167e-05	1.30707e-05	1.1257e-05	8.10521e-06	9.89963e-06	1.46857e-05	1.50589e-05	1.68293e-05	1.72083e-05	2.23866e-05	2.46439e-05		Senegal	2.46397e-05	2.4814e-05	2.40095e-05	2.91484e-05
Serbia	1655	2220	2676	3152	3578	3777	3625	3805	4035	4195	4305	4620	5005	5270	5415	1.61	0.812311	0.0198911	0.0025				0.0003	0.0028	0.0028	0.0226911		Serbia	6.84036e-06	9.24048e-06	1.12564e-05	1.36669e-05	1.53622e-05	1.57983e-05	1.54091e-05	1.16457e-05	1.37125e-05	1.45397e-05	1.53001e-05	1.63111e-05	1.71173e-05	1.85624e-05	2.01565e-05		Serbia	5.5434e-05	7.48845e-05	9.12214e-05	0.000110756
Serbia (including Kosovo) (June 3, 2006-February 16, 2008)	627	518	407	367	327	284	275	275	250	245	205	200	165	155	135	1.61	0.812311	0.0198911	0.0025				0.0003	0.0028	0.0028	0.0226911		Serbia (including Kosovo) (June 3, 2006-February 16, 2008)	2.59148e-06	2.15611e-06	1.71202e-06	1.59129e-06	1.40398e-06	1.18791e-06	1.16897e-06	8.41674e-07	8.49598e-07	8.49157e-07	7.28575e-07	7.06109e-07	5.64307e-07	5.45953e-07	5.02516e-07		Serbia (including Kosovo) (June 3, 2006-February 16, 2008)	2.10013e-05	1.74731e-05	1.38741e-05	1.28957e-05
Serbia and Montenegro (February 5, 2003-June 2, 2006)	838	685	550	536	490	455	425	425	420	420	395	380	355	325	290	1.61	0.812311	0.0198911	0.0025				0.0003	0.0028	0.0028	0.0226911		Serbia and Montenegro (February 5, 2003-June 2, 2006)	3.46358e-06	2.85123e-06	2.31353e-06	2.32406e-06	2.10382e-06	1.90316e-06	1.80659e-06	1.30077e-06	1.42732e-06	1.4557e-06	1.40384e-06	1.34161e-06	1.21412e-06	1.14474e-06	1.07948e-06		Serbia and Montenegro (February 5, 2003-June 2, 2006)	2.80687e-05	2.31063e-05	1.87488e-05	1.88341e-05
Seychelles	3	3	4	2	1	1	0	0	0	0	0	0	0	0	0	2.02	1.01917	0.19	0.00075		0.006		0.0003	0.00705	0.00705	0.19705		Seychelles	3.122e-08	3.14408e-08	4.23647e-08	2.18345e-08	1.08104e-08	1.05316e-08	0	0	0	0	0	0	0	0	0		Seychelles	8.7261e-07	8.78782e-07	1.18411e-06	6.10283e-07
Sierra Leone	79	84	87	89	85	85	80	60	65	60	50	65	65	75	80	3.791	1.91271	0.406157	0.00075	0.028	0.225		0.0003	0.25405	0.25405	0.660207		Sierra Leone	2.96257e-05	3.17236e-05	3.32043e-05	3.50134e-05	3.31125e-05	3.22585e-05	3.08547e-05	1.66619e-05	2.00423e-05	1.88684e-05	1.61232e-05	2.08217e-05	2.017e-05	2.39688e-05	2.70189e-05		Sierra Leone	7.69892e-05	8.2441e-05	8.62889e-05	9.09902e-05
Zimbabwe	26	25	19	25	27	26	30	45	65	65	65	80	110	125	160	3.724	1.87891	0.351975	0.0015	0	0.014		0.0003	0.0158	0.0158	0.367775		Zimbabwe	6.06392e-07	5.87193e-07	4.50989e-07	6.11676e-07	6.54146e-07	6.13672e-07	7.19599e-07	7.77182e-07	1.24648e-06	1.27126e-06	1.30357e-06	1.59379e-06	2.12287e-06	2.48447e-06	3.36074e-06		Zimbabwe	1.41149e-05	1.3668e-05	1.04976e-05	1.42379e-05
Singapore	57	56	70	62	64	81	80	105	110	145	135	150	180	185	180	0.97	0.489405	0.160334	0.03				0.0003	0.0303	0.063179	0.190634		Singapore	5.31582e-06	5.2595e-06	6.64395e-06	6.06581e-06	6.20021e-06	7.64476e-06	7.67317e-06	7.25129e-06	8.43491e-06	1.13398e-05	1.0826e-05	1.19494e-05	1.38905e-05	1.47031e-05	1.51183e-05		Singapore	1.60398e-05	1.58698e-05	2.00472e-05	1.83028e-05
Slovakia	395	394	408	398	400	469	515	1095	805	815	820	800	795	790	745	1.49	0.751766	0	0.001				0.0003	0.0013	0.0013	0.0013		Slovakia	7.57989e-07	7.61418e-07	7.96817e-07	8.01218e-07	7.97365e-07	9.10799e-07	1.0164e-06	1.556e-06	1.27015e-06	1.31149e-06	1.35307e-06	1.31134e-06	1.26236e-06	1.29192e-06	1.28753e-06		Slovakia	7.57989e-07	7.61418e-07	7.96817e-07	8.01218e-07
Slovenia	267	274	280	277	267	317	355	740	580	605	590	580	600	590	575	1.51	0.761857	0	0.001				0.0003	0.0013	0.0013	0.0013		Slovenia	5.12362e-07	5.29514e-07	5.46836e-07	5.57632e-07	5.32241e-07	6.15614e-07	7.00622e-07	1.05155e-06	9.15138e-07	9.7356e-07	9.73549e-07	9.50725e-07	9.52726e-07	9.64853e-07	9.93732e-07		Slovenia	5.12362e-07	5.29514e-07	5.46836e-07	5.57632e-07
Somalia	18	16	21	20	49	111	150	160	165	205	230	255	270	300	345	6.132	3.09384	0.0198931	0.005		0.001		0.0003	0.0063	0.0063	0.0261931		Somalia	1.67392e-07	1.49846e-07	1.98754e-07	1.95117e-07	4.73359e-07	1.04465e-06	1.43464e-06	1.10183e-06	1.26165e-06	1.59867e-06	1.83921e-06	2.02565e-06	2.07768e-06	2.37754e-06	2.88947e-06		Somalia	6.95956e-07	6.23003e-07	8.26344e-07	8.11224e-07
Soviet Union (until 25.12.1991)	503	470	440	770	692	633	580	560	525	435	400	360	330	300	210	n.a.												Soviet Union (until 25.12.1991)																	Soviet Union (until 25.12.1991)
Spain	3076	3135	3221	3161	2997	3495	3980	9370	6920	6760	6835	6915	6955	7125	6745	1.12	0.565086	0.00723017	0.00262202	0.000374818	0.00108027	2.03522e-05	0.000290737	0.0043882	0.00445605	0.0116184		Spain	2.02329e-05	2.07669e-05	2.15623e-05	2.18122e-05	2.04781e-05	2.3265e-05	2.69243e-05	4.56396e-05	3.74258e-05	3.72872e-05	3.8659e-05	3.88531e-05	3.78547e-05	3.99393e-05	3.99567e-05		Spain	5.27538e-05	5.4146e-05	5.622e-05	5.68714e-05
Sri Lanka	432	415	404	400	373	366	365	350	360	335	325	325	350	375	370	1.974	0.995964	0.494006	0.025			0.025	0.0003	0.0503	0.0503	0.544306		Sri Lanka	3.20756e-05	3.10313e-05	3.05284e-05	3.11568e-05	2.87694e-05	2.75014e-05	2.78723e-05	1.92437e-05	2.19779e-05	2.08582e-05	2.07498e-05	2.06127e-05	2.15035e-05	2.37282e-05	2.47416e-05		Sri Lanka	0.000347096	0.000335795	0.000330354	0.000337153
St. Kitts and Nevis	0	0	0	0	1	2	0	0	0	0	0	0	0	0	0	1.505	0.759334	0.23315	0.01	0.04	0.11		0.0003	0.1603	0.1603	0.39345		St. Kitts and Nevis	0	0	0	0	2.45803e-07	4.78927e-07	0	0	0	0	0	0	0	0	0		St. Kitts and Nevis	0	0	0	0
St. Lucia	4	4	4	6	4	4	0	0	0	0	0	0	0	0	0	1.379	0.695762	0.213231	0.01	0.03	0.1		0.0003	0.1403	0.1403	0.353531		St. Lucia	8.284e-07	8.3426e-07	8.43088e-07	1.30357e-06	8.60541e-07	8.38347e-07	0	0	0	0	0	0	0	0	0		St. Lucia	2.08742e-06	2.10219e-06	2.12443e-06	3.28476e-06
St. Vincent and the Grenadines	0	0	0	0	0	1	0	0	0	0	0	0	0	0	0	1.775	0.89556	0.147776	0.03	0.03	0.068		0.0003	0.1283	0.1283	0.276076		St. Vincent and the Grenadines	0	0	0	0	0	1.91661e-07	0	0	0	0	0	0	0	0	0		St. Vincent and the Grenadines	0	0	0	0
Stateless	234	237	232	232	211	214	240	260	275	280	270	250	245	240	230	n.a.												Stateless																	Stateless
South Africa	149	154	166	163	167	179	190	240	280	325	330	360	440	490	485	2.216	1.11806	0.125484	0.0015	0.001	0.003		0.0003	0.0058	0.0058	0.131284		South Africa	1.27567e-06	1.3278e-06	1.44641e-06	1.464e-06	1.48525e-06	1.55091e-06	1.67299e-06	1.52157e-06	1.97107e-06	2.33333e-06	2.42943e-06	2.63278e-06	3.11713e-06	3.57511e-06	3.73962e-06		South Africa	2.88749e-05	3.00549e-05	3.27397e-05	3.31377e-05
Sudan (including South Sudan) (until July 8, 2011)	98	91	76	71	64	58	30	25	30	30	20	10	10	10	0	4.323	2.18113	0.344047	0.039	0.001	0.021		0.0003	0.0613	0.0613	0.405347		Sudan (including South Sudan) (until July 8, 2011)	8.86766e-06	8.2925e-06	6.99889e-06	6.73974e-06	6.01581e-06	5.31122e-06	2.79186e-06	1.67515e-06	2.23201e-06	2.27638e-06	1.55615e-06	7.72937e-07	7.48745e-07	7.71128e-07	0		Sudan (including South Sudan) (until July 8, 2011)	5.86376e-05	5.48343e-05	4.62803e-05	4.45667e-05
Sudan (excluding South Sudan) (from July 9, 2011)	0	0	9	17	36	54	60	75	80	85	85	95	135	170	195	4.323	2.18113	0.344047	0.039	0.001	0.021		0.0003	0.0613	0.0613	0.405347		Sudan (excluding South Sudan) (from July 9, 2011)	0	0	8.28816e-07	1.61374e-06	3.3839e-06	4.94493e-06	5.58373e-06	5.02545e-06	5.95204e-06	6.44976e-06	6.61366e-06	7.3429e-06	1.01081e-05	1.31092e-05	1.58911e-05		Sudan (excluding South Sudan) (from July 9, 2011)	0	0	5.48056e-06	1.06709e-05
South Sudan (from July 9, 2011)	0	0	1	1	2	7	0	0	0	0	0	0	0	0	0	3.864	1.94955	0.344047	0.039	0.001	0.021		0.0003	0.0613	0.0613	0.405347		South Sudan (from July 9, 2011)	0	0	9.20907e-08	9.4926e-08	1.87994e-07	6.4101e-07	0	0	0	0	0	0	0	0	0		South Sudan (from July 9, 2011)	0	0	6.08951e-07	6.277e-07
Suriname	1	1	1	1	1	1	0	0	0	0	0	0	0	0	0	2.249	1.13471	0.151776	0.01	0.015	0.07		0.0003	0.0953	0.0953	0.247076		Suriname	1.40675e-07	1.4167e-07	1.43169e-07	1.47577e-07	1.46132e-07	1.42364e-07	0	0	0	0	0	0	0	0	0		Suriname	3.64714e-07	3.67294e-07	3.71181e-07	3.82608e-07
Syria	643	665	705	964	1438	4408	5805	6940	7770	8715	9135	9850	10560	11250	10810	2.712	1.36831	0.0294426	0.05		0.01		0.0003	0.0603	0.0603	0.0897426		Syria	5.72336e-05	5.96105e-05	6.38648e-05	9.00158e-05	0.000132963	0.000397068	0.000531413	0.000457435	0.000568661	0.000650502	0.000699179	0.000748923	0.000777777	0.000853367	0.000866565		Syria	8.51789e-05	8.87164e-05	9.5048e-05	0.000133968
Tajikistan	30	31	32	37	44	44	45	35	55	60	60	85	115	130	140	3.072	1.54995	0.133277	0.05				0.0003	0.0503	0.0503	0.183577		Tajikistan	2.22747e-06	2.318e-06	2.41809e-06	2.882e-06	3.39371e-06	3.30618e-06	3.43631e-06	1.92437e-06	3.35773e-06	3.7358e-06	3.83073e-06	5.39101e-06	7.06544e-06	8.22578e-06	9.36169e-06		Tajikistan	8.12948e-06	8.45988e-06	8.82519e-06	1.05183e-05
Taiwan	345	357	388	372	384	420	470	545	620	685	680	725	780	830	815	0.999	0.504036	0.092191	0.02				0.0003	0.0203	0.058676	0.112491		Taiwan	2.98815e-05	3.11396e-05	3.42017e-05	3.38009e-05	3.45498e-05	3.68143e-05	4.18669e-05	3.49551e-05	4.41537e-05	4.97525e-05	5.06444e-05	5.36392e-05	5.59022e-05	6.12639e-05	6.35735e-05		Taiwan	5.72875e-05	5.96994e-05	6.55699e-05	6.48015e-05
Tanzania	27	28	33	38	38	38	40	35	40	45	50	45	75	80	110	4.606	2.32392	0.382019	0.0015	0	0.23		0.0003	0.2318	0.2318	0.613819		Tanzania	9.23847e-06	9.6484e-06	1.14917e-05	1.36402e-05	1.35068e-05	1.31584e-05	1.40762e-05	8.86818e-06	1.12535e-05	1.29119e-05	1.47111e-05	1.31525e-05	2.12348e-05	2.33276e-05	3.38972e-05		Tanzania	2.4464e-05	2.55495e-05	3.04305e-05	3.61201e-05
Thailand	2872	2783	2695	2569	2455	2312	2240	2180	2320	1960	1870	1790	1745	1705	1620	1.212	0.611504	0.655449	0.0495517	0	0	0.208501	0.0003	0.258352	0.283891	0.913802		Thailand	0.00120354	0.00117449	0.00114939	0.00112938	0.0010687	0.000980496	0.000965411	0.00067649	0.000799383	0.000688766	0.000673838	0.000640749	0.000605091	0.000608894	0.000611399		Thailand	0.003874	0.0037805	0.0036997	0.0036353
Timor-Leste	0	0	0	0	0	0	0	0	0	0	0	0	0	0	0	2.707	1.36579	0.242026	0.03			0.04	0.0003	0.0703	0.0703	0.312326		Timor-Leste	0	0	0	0	0	0	0	0	0	0	0	0	0	0	0		Timor-Leste	0	0	0	0
Togo	50	54	58	60	67	68	45	40	55	65	75	85	95	100	110	4.192	2.11504	0.4071	0.005	0.094	0.186		0.0003	0.2853	0.2853	0.6924		Togo	2.10569e-05	2.29023e-05	2.48591e-05	2.6508e-05	2.9311e-05	2.89812e-05	1.94907e-05	1.24743e-05	1.90449e-05	2.29551e-05	2.71597e-05	3.05777e-05	3.31054e-05	3.58895e-05	4.17208e-05		Togo	5.11034e-05	5.5582e-05	6.0331e-05	6.43329e-05
Tonga	4	3	4	5	5	5	0	0	0	0	0	0	0	0	0	3.129	1.57871	0.1664	0.00075				0.0003	0.00105	0.00105	0.16745		Tonga	6.19972e-09	4.68268e-09	6.30964e-09	8.12987e-09	8.05032e-09	7.8427e-09	0	0	0	0	0	0	0	0	0		Tonga	9.88707e-07	7.46775e-07	1.00624e-06	1.29652e-06
Trinidad and Tobago	25	25	22	23	22	23	10	10	5	5	5	10	10	10	15	1.532	0.772957	0.172628	0.01	0.02	0.08		0.0003	0.1103	0.1103	0.282928		Trinidad and Tobago	4.07041e-06	4.0992e-06	3.64547e-06	3.92851e-06	3.72094e-06	3.78974e-06	1.67451e-06	1.20567e-06	6.69362e-07	6.82668e-07	7.00016e-07	1.39078e-06	1.34725e-06	1.38753e-06	2.19951e-06		Trinidad and Tobago	1.04409e-05	1.05148e-05	9.35091e-06	1.00769e-05
Chad	11	11	10	9	12	12	0	0	0	0	0	0	0	0	0	6.12	3.08779	0.405214	0.009	0.003	0.09		0.0003	0.1023	0.1023	0.507514		Chad	1.66108e-06	1.67283e-06	1.53685e-06	1.42575e-06	1.8824e-06	1.83385e-06	0	0	0	0	0	0	0	0	0		Chad	8.24068e-06	8.29897e-06	7.62436e-06	7.07318e-06
Czechia	778	773	787	789	770	862	950	1865	1355	1325	1290	1330	1350	1370	1320	1.45	0.731584	0	0.001				0.0003	0.0013	0.0013	0.0013		Czechia	1.49295e-06	1.49385e-06	1.537e-06	1.58835e-06	1.53493e-06	1.67401e-06	1.87491e-06	2.65018e-06	2.13795e-06	2.13218e-06	2.12861e-06	2.18011e-06	2.14363e-06	2.24042e-06	2.28126e-06		Czechia	1.49295e-06	1.49385e-06	1.537e-06	1.58835e-06
Czechoslovakia (until December 31, 1992)	117	108	105	92	88	84	60	65	65	45	45	35	30	25	15	n.a.												Czechoslovakia (until December 31, 1992)																	Czechoslovakia (until December 31, 1992)
Tunisia	315	336	349	365	429	462	515	595	715	770	820	910	1095	1240	1375	1.832	0.924319	0.345434	0.0214199	0.00235335	0.0211801	0	0.0003	0.0452533	0.0452533	0.390687		Tunisia	2.10419e-05	2.26034e-05	2.37264e-05	2.55781e-05	2.97688e-05	3.12319e-05	3.5381e-05	2.94321e-05	3.9271e-05	4.31326e-05	4.71006e-05	5.19249e-05	6.05255e-05	7.05892e-05	8.27202e-05		Tunisia	0.000181661	0.000195142	0.000204838	0.000220824
Turkey	33207	33099	32749	32433	31993	30945	30150	29590	29170	29125	28130	27325	27325	28045	27085	1.51	0.761857	0.0296332	0.016699	1.05535e-05	0.004403	0	0.0003	0.0214126	0.0214126	0.0510457		Turkey	0.00104959	0.00105358	0.00105347	0.00107543	0.00105046	0.000989841	0.000980095	0.000692575	0.000758089	0.000771967	0.000764541	0.000737755	0.000714665	0.000755422	0.000771002		Turkey	0.00250214	0.00251164	0.00251138	0.00256372
Turkmenistan	29	33	42	78	177	256	195	185	160	160	150	150	275	315	365	2.69	1.35721	0.13495	0.012				0.0003	0.0123	0.0123	0.14725		Turkmenistan	5.26533e-07	6.03396e-07	7.76086e-07	1.48568e-06	3.33835e-06	4.70383e-06	3.64126e-06	2.48731e-06	2.38858e-06	2.43607e-06	2.34185e-06	2.32638e-06	4.13153e-06	4.87396e-06	5.96838e-06		Turkmenistan	6.30343e-06	7.2236e-06	9.29096e-06	1.77859e-05
Tuvalu	0	0	0	0	0	0	0	0	0	0	0	0	0	0	0	3.208	1.61857	0.1664	0.00075				0.0003	0.00105	0.00105	0.16745		Tuvalu	0	0	0	0	0	0	0	0	0	0	0	0	0	0	0		Tuvalu	0	0	0	0
Uganda	51	53	57	55	58	65	50	55	65	75	70	105	130	150	170	4.283	2.16095	0.382204	0.00075		0.168		0.0003	0.16905	0.16905	0.551254		Uganda	1.27265e-05	1.33191e-05	1.44759e-05	1.4398e-05	1.50348e-05	1.64148e-05	1.28321e-05	1.01632e-05	1.33366e-05	1.56942e-05	1.50202e-05	2.23814e-05	2.68431e-05	3.18986e-05	3.82052e-05		Uganda	4.14997e-05	4.34321e-05	4.72043e-05	4.69504e-05
Ukraine	3553	3631	3711	3703	3942	4192	4490	4770	5085	5295	5545	5770	25580	27295	28075	0.977	0.492936	0	0.001				0.0003	0.0013	0.0013	0.0013		Ukraine	6.81807e-06	7.01703e-06	7.24752e-06	7.45455e-06	7.85803e-06	8.14087e-06	8.86139e-06	6.77821e-06	8.02324e-06	8.52066e-06	9.14971e-06	9.45807e-06	4.06179e-05	4.46367e-05	4.85201e-05		Ukraine	6.81807e-06	7.01703e-06	7.24752e-06	7.45455e-06
Hungary	939	936	939	938	919	1203	1505	3475	2995	2875	2935	2990	3175	3335	3040	1.51	0.761857	0	0.001				0.0003	0.0013	0.0013	0.0013		Hungary	1.8019e-06	1.80885e-06	1.83385e-06	1.8883e-06	1.83195e-06	2.33623e-06	2.97024e-06	4.938e-06	4.72558e-06	4.62642e-06	4.84299e-06	4.90115e-06	5.04151e-06	5.45387e-06	5.25382e-06		Hungary	1.8019e-06	1.80885e-06	1.83385e-06	1.8883e-06
Unclear / No information provided	2863	2766	2738	2552	2720	3481	4370	4575	4890	5175	5210	5300	5345	5290	5065	n.a.												Unclear / No information provided																	Unclear / No information provided
Uruguay	29	30	33	33	35	34	15	20	25	45	65	75	80	80	95	1.409	0.710898	0.0198812	0.01				0.0003	0.0103	0.0103	0.0301812		Uruguay	4.40918e-07	4.59348e-07	5.1063e-07	5.26351e-07	5.52789e-07	5.23145e-07	2.34553e-07	2.25175e-07	3.12531e-07	5.73738e-07	8.49792e-07	9.74052e-07	1.00647e-06	1.03656e-06	1.30083e-06		Uruguay	1.29198e-06	1.34599e-06	1.49626e-06	1.54232e-06
Uzbekistan	217	218	214	212	218	213	215	210	220	245	245	265	295	325	300	3.5	1.76589	0.135028	0.03				0.0003	0.0303	0.0303	0.165328		Uzbekistan	9.70566e-06	9.81935e-06	9.74118e-06	9.94725e-06	1.01287e-05	9.64114e-06	9.88994e-06	6.95529e-06	8.0906e-06	9.18909e-06	9.4226e-06	1.01245e-05	1.09179e-05	1.23877e-05	1.20843e-05		Uzbekistan	5.29578e-05	5.35781e-05	5.31516e-05	5.4276e-05
Vanuatu	0	0	0	0	0	0	0	0	0	0	0	0	0	0	0	3.596	1.81433	0.351975	0.00075				0.0003	0.00105	0.00105	0.353025		Vanuatu	0	0	0	0	0	0	0	0	0	0	0	0	0	0	0		Vanuatu	0	0	0	0
Vatican City	1	1	0	0	0	0	0	0	0	0	0	0	0	0	0	n.a.												Vatican City																	Vatican City
Venezuela, Bolivarian Republic of	135	151	166	183	216	231	235	275	315	350	355	375	435	470	470	2.079	1.04894	0.106173	0.00377107	0.00400629	0.0207201	0	0.0003	0.0287975	0.0287975	0.134971		Venezuela, Bolivarian Republic of	5.73867e-06	6.46421e-06	7.18155e-06	8.16075e-06	9.53811e-06	9.9374e-06	1.02739e-05	8.65646e-06	1.10098e-05	1.24763e-05	1.29761e-05	1.36166e-05	1.53009e-05	1.70262e-05	1.79933e-05		Venezuela, Bolivarian Republic of	2.68965e-05	3.0297e-05	3.36591e-05	3.82485e-05
United Arab Emirates	13	13	15	17	17	27	5	0	0	0	5	5	5	0	5	1.2	0.605449	0.495076	0.0171		0.0189		0.0003	0.0363	0.0363	0.531376		United Arab Emirates	6.96583e-07	7.0151e-07	8.18e-07	9.55609e-07	9.46258e-07	1.46412e-06	2.75543e-07	0	0	0	2.30377e-07	2.28855e-07	2.21692e-07	0	2.41288e-07		United Arab Emirates	1.01969e-05	1.0269e-05	1.19743e-05	1.39886e-05
United States	4685	5181	5318	5672	5475	5747	6255	7010	7435	7915	7050	7130	7530	7800	7855	1.6165	0.81559	0.0386324	0.00384663	0.00711948	0.00861795	0.00118313	0.0003	0.0210672	0.0218799	0.0596996		United States	0.000151314	0.000168517	0.000174803	0.000192179	0.000183689	0.000187842	0.000207771	0.000167655	0.000197443	0.000214368	0.000195793	0.000196707	0.00020124	0.000214687	0.000228481		United States	0.000412861	0.0004598	0.000476953	0.000524363
United Kingdom	2652	2667	2646	2541	2406	2905	3410	7930	5805	5860	6235	5795	5725	5690	5170	1.56	0.787084	0.0195831	0.00451323	0.0013378	0.00457919	0.000575841	0.0017718	0.0127779	0.0134903	0.032361		United Kingdom	5.281e-05	5.34844e-05	5.36248e-05	5.30823e-05	4.97702e-05	5.85427e-05	6.98372e-05	0.000116936	9.50468e-05	9.78547e-05	0.000106763	9.85728e-05	9.43342e-05	9.65602e-05	9.2719e-05		United Kingdom	0.000126683	0.000128301	0.000128637	0.000127336
Vietnam	5847	5991	6104	6243	6220	6432	6710	7000	7320	7770	8190	8765	9325	9870	10655	1.913	0.965187	0.208254	0.0259562	0	0	0.090939	0.0003	0.117195	0.132723	0.325449		Vietnam	0.00114552	0.00118203	0.00121707	0.00128311	0.00126588	0.00127526	0.00135202	0.00101554	0.00117916	0.00127653	0.00137973	0.00146684	0.00151171	0.0016479	0.00188		Vietnam	0.00280892	0.00289845	0.00298437	0.0031463
Central African Republic	0	0	0	1	1	1	0	0	0	0	0	0	0	0	0	6.012	3.0333	0.4071	0.001	0.001	0.151		0.0003	0.1533	0.1533	0.5604		Central African Republic	0	0	0	2.37392e-07	2.35069e-07	2.29007e-07	0	0	0	0	0	0	0	0	0		Central African Republic	0	0	0	8.67806e-07
Cyprus	39	37	39	40	39	61	75	160	135	135	165	185	170	180	180	1.389	0.700807	0.4148	0.15		0.01		0.0003	0.1603	0.167094	0.5751		Cyprus	9.6194e-06	9.19065e-06	9.78996e-06	1.03501e-05	9.99262e-06	1.52264e-05	1.90254e-05	2.92236e-05	2.73785e-05	2.79228e-05	3.49951e-05	3.89777e-05	3.46963e-05	3.78355e-05	3.99845e-05		Cyprus	3.31078e-05	3.16322e-05	3.36948e-05	3.56228e-05
Number of non-German women in childbearing age in Berlin	155197	158314	160951	162999	164119	182183	197020	276640	255355	261195	262905	268875	303545	318535	315360	1.982												Sum significant variants	0.00680475	0.00698036	0.00717118	0.00754171	0.00756247	0.00812676	0.00872363	0.00745213	0.00840259	0.00892333	0.00934823	0.00972227	0.010287	0.0113474	0.012282		Sum all variants	0.0208755	0.0214634	0.0221471	0.0234888
Number of all women in childbearing age in Berlin	876915	831698	840493	846647	849819	851865	858481	862858	867096	870886	865199	870243	866033	879249	890882
Share of non-German women in childbearing age	0.176981	0.19035	0.191496	0.192523	0.193122	0.213864	0.229498	0.320609	0.294494	0.299919	0.303867	0.308965	0.350501	0.362281	0.353986
Number of live births with non-German mother in Berlin	7650	7784	8385	8844	9404	10350	12289	12144	12460	12772	12912	13279	13247	13672	14149
Total live births in Berlin	33393	33075	34678	35038	37368	38030	41086	40160	40203	39503	38693	39168	35729	34120	33749
Live births with non-German mother % of all live births in Berlin	0.22909	0.235344	0.241796	0.252412	0.251659	0.272154	0.299104	0.30239	0.309927	0.323317	0.333704	0.339027	0.370763	0.400703	0.419242
Fertility rate adjustment factor	1.29443	1.23637	1.26267	1.31107	1.30311	1.27256	1.3033	0.943175	1.0524	1.07802	1.09819	1.0973	1.05781	1.10606	1.18435
Fertility adjusted haemoglobinopathy carriage rate, significant variants	0.00680475	0.00698036	0.00717118	0.00754171	0.00756247	0.00812676	0.00872363	0.00745213	0.00840259	0.00892333	0.00934823	0.00972227	0.010287	0.0113474	0.012282
Fertility adjusted haemoglobinopathy carriage rate, all variants	0.0208755	0.0214634	0.0221471	0.0234888	0.0238019	0.025522	0.0275579	0.0229067	0.0264335	0.0284749	0.0301914	0.0319918	0.0350262	0.0395843	0.0435821
Fertility adjusted haemoglobinopathy carriage rate (country weighted), significant variants	0.00695595	0.00720829	0.00748039	0.00797047	0.00809049	0.00887316	0.00957012	0.00790975	0.00912256	0.0098593	0.0104017	0.0109399	0.011785	0.0131361	0.014366
Fertility adjusted haemoglobinopathy carriage rate (country weighted), all variants	0.0218664	0.022702	0.0236606	0.0254494	0.0260907	0.0286804	0.03112	0.0252418	0.0296109	0.032378	0.0345042	0.0368853	0.0409491	0.0465371	0.0515605
CF: haemoglobinopathies carrier frequency in pregnancies; SV: only significant variants; AV: any variant; TFR (2023): total fertility rate as published for the year 2023; Cw FRF: country-specific fertility-rate weighting factor
[truncated: 43 more columns]

## Sheet: S5
Brandenburg	2010	2011	2012	2013	2014	2015	2016	2017	2018	2019	2020	2021	2022	2023	2024	TFR 2023	Cw FRF 20203	CF any alpha variant	CF A/ß-Thal.	CF A/HbC	CF A/HbS	CF A/HbE	CF other beta variants	CF any beta variant	CF, SV (a/b coincidence)	CF, AV (a/b coincidence)		significant variants	2010	2011	2012	2013	2014	2015	2016	2017	2018	2019	2020	2021	2022	2023	2024		all variants	2010	2011	2012	2013
Afghanistan	165	222	258	259	274	528	1155	1190	1295	1365	1435	1775	2105	2295	2550	4.84	2.44198	0.151944	0.03				0.0003	0.0303	0.0303	0.182244		Afghanistan	1.44843e-05	1.91785e-05	2.17177e-05	2.28808e-05	2.22735e-05	4.34618e-05	0.000139428	0.000128721	0.000140242	0.000143603	0.000145924	0.000168891	0.000173976	0.000203791	0.000243583		Afghanistan	8.71181e-05	0.000115352	0.000130624	0.00013762
Egypt	14	15	21	21	34	36	50	75	90	100	90	100	115	165	200	2.75	1.38749	0.161989	0.02		0.002		0.0003	0.0223	0.0223	0.184289		Egypt	9.04491e-07	9.53709e-07	1.301e-06	1.36538e-06	2.03413e-06	2.18091e-06	4.44221e-06	5.97071e-06	7.1732e-06	7.74272e-06	6.73567e-06	7.00277e-06	6.99514e-06	1.07832e-05	1.40605e-05		Egypt	7.4748e-06	7.88155e-06	1.07516e-05	1.12836e-05
Albania	9	13	20	32	72	348	190	185	245	295	330	400	455	540	550	1.348	0.680121	0.0879363	0.05	0	0.03	0	0.0003	0.0803	0.0803	0.168236		Albania	2.09377e-06	2.97631e-06	4.46167e-06	7.49196e-06	1.55111e-05	7.59147e-05	6.07845e-05	5.30331e-05	7.03149e-05	8.22482e-05	8.8933e-05	0.000100865	9.966e-05	0.000127078	0.000139233		Albania	4.38665e-06	6.23567e-06	9.34763e-06	1.56964e-05
Algeria	8	7	7	7	13	14	10	5	15	15	10	20	30	55	70	2.766	1.39556	0.346633	0.035	0.012	0.009		0.0003	0.0563	0.0563	0.402933		Algeria	1.30488e-06	1.12364e-06	1.09486e-06	1.14904e-06	1.96357e-06	2.14125e-06	2.24302e-06	1.00493e-06	3.01832e-06	2.93217e-06	1.88948e-06	3.53593e-06	4.60706e-06	9.07469e-06	1.24243e-05		Algeria	9.33886e-06	8.04175e-06	7.83578e-06	8.22357e-06
Andorra	0	0	0	0	0	0	0	0	0	0	0	0	0	0	0	1.082	0.545913	0	0.001				0.0003	0.0013	0.0013	0.0013		Andorra	0	0	0	0	0	0	0	0	0	0	0	0	0	0	0		Andorra	0	0	0	0
Angola	18	13	9	7	9	10	5	0	0	0	0	0	0	0	0	5.124	2.58527	0.406157	0.00075		0.247		0.0003	0.24805	0.24805	0.654207		Angola	1.29355e-05	9.19395e-06	6.20202e-06	5.06252e-06	5.98932e-06	6.73861e-06	4.94121e-06	0	0	0	0	0	0	0	0		Angola	3.41161e-05	2.42481e-05	1.63572e-05	1.33519e-05
Antigua and Barbuda	0	0	0	0	0	0	0	0	0	0	0	0	0	0	0	1.578	0.796165	0.213231	0.01	0.02	0.1		0.0003	0.1303	0.1303	0.343531		Antigua and Barbuda	0	0	0	0	0	0	0	0	0	0	0	0	0	0	0		Antigua and Barbuda	0	0	0	0
Equatorial Guinea	0	1	1	1	2	1	0	0	0	0	0	0	0	0	0	4.081	2.05903	0.4071	0.00075		0.2		0.0003	0.20105	0.20105	0.60815		Equatorial Guinea	0	5.73223e-07	5.58542e-07	5.86184e-07	1.07877e-06	5.46179e-07	0	0	0	0	0	0	0	0	0		Equatorial Guinea	0	1.73393e-06	1.68952e-06	1.77313e-06
Argentina	16	20	24	25	24	23	0	5	10	15	20	15	30	35	35	1.5	0.756811	0.0218768	0.01				0.0003	0.0103	0.0103	0.0321768		Argentina	4.7745e-07	5.87336e-07	6.86752e-07	7.5077e-07	6.63199e-07	6.43571e-07	0	1.83851e-07	3.68131e-07	5.36435e-07	6.91355e-07	4.8517e-07	8.42854e-07	1.05649e-06	1.1365e-06		Argentina	1.49154e-06	1.83482e-06	2.14539e-06	2.34538e-06
Armenia	35	40	39	43	45	49	55	70	75	80	80	115	140	145	150	1.9	0.958628	0.019899	0.02				0.0003	0.0203	0.0203	0.040199		Armenia	2.05843e-06	2.31513e-06	2.19944e-06	2.54504e-06	2.45078e-06	2.70224e-06	4.44818e-06	5.07287e-06	5.44155e-06	5.63865e-06	5.45029e-06	7.33093e-06	7.75207e-06	8.6263e-06	9.59957e-06		Armenia	4.07619e-06	4.58453e-06	4.35543e-06	5.0398e-06
Azerbaijan	32	34	41	45	34	40	15	15	30	40	50	60	75	90	130	1.55	0.782038	0.316272	0.054		0.006		0.0003	0.0603	0.0603	0.376572		Azerbaijan	5.59034e-06	5.84542e-06	6.86835e-06	7.91151e-06	5.50037e-06	6.55252e-06	3.60357e-06	3.229e-06	6.46553e-06	8.37464e-06	1.01186e-05	1.13614e-05	1.23359e-05	1.59045e-05	2.4713e-05		Azerbaijan	3.49116e-05	3.65046e-05	4.28927e-05	4.94073e-05
Ethiopia	6	8	8	6	9	14	0	15	20	10	15	40	35	35	50	3.989	2.01261	0.0198931	0.005	0	0.001		0.0003	0.0063	0.0063	0.0261931		Ethiopia	1.09512e-07	1.43698e-07	1.40017e-07	1.1021e-07	1.52117e-07	2.39607e-07	0	3.37358e-07	4.50335e-07	2.18741e-07	3.17151e-07	7.91345e-07	6.01454e-07	6.46203e-07	9.93059e-07		Ethiopia	4.55312e-07	5.97442e-07	5.82141e-07	4.58213e-07
Australia	22	23	27	34	36	32	25	20	35	30	20	20	25	40	50	1.5	0.756811	0.0363039	0.00425757	8.18525e-05	0.00113573	0.00433954	5.97528e-05	0.00987444	0.0122397	0.0461784		Australia	7.80126e-07	8.02636e-07	9.18092e-07	1.21333e-06	1.18214e-06	1.06403e-06	1.21909e-06	8.73897e-07	1.5311e-06	1.27491e-06	8.21551e-07	7.68716e-07	8.34651e-07	1.4348e-06	1.92933e-06		Australia	2.94328e-06	3.02821e-06	3.46381e-06	4.5777e-06
Bahamas	0	0	0	0	0	0	0	0	0	0	0	0	0	0	0	1.373	0.692735	0.291373	0.01	0.03	0.14		0.0003	0.1803	0.1803	0.471673		Bahamas	0	0	0	0	0	0	0	0	0	0	0	0	0	0	0		Bahamas	0	0	0	0
Bahrain	0	0	0	0	0	0	0	0	0	5	5	0	0	0	0	1.824	0.920283	0.554856	0.029		0.138		0.0003	0.1673	0.167766	0.722156		Bahrain	0	0	0	0	0	0	0	0	0	2.91248e-06	2.81519e-06	0	0	0	0		Bahrain	0	0	0	0
Bangladesh	4	8	7	7	8	10	5	15	30	45	65	85	115	130	200	2.163	1.09132	0.495591	0.025			0.04	0.0003	0.0653	0.0653	0.560891		Bangladesh	7.56736e-07	1.48944e-06	1.26988e-06	1.33273e-06	1.40152e-06	1.77396e-06	1.30079e-06	3.49675e-06	7.00164e-06	1.02027e-05	1.42449e-05	1.743e-05	2.04835e-05	2.48781e-05	4.11725e-05		Bangladesh	6.49995e-06	1.27935e-05	1.09076e-05	1.14474e-05
Barbados	0	0	0	0	0	1	0	0	0	0	0	0	0	0	0	1.708	0.861756	0.151943	0.005	0.046	0.07		0.0003	0.1213	0.1213	0.273243		Barbados	0	0	0	0	0	3.29528e-07	0	0	0	0	0	0	0	0	0		Barbados	0	0	0	0
Belarus	387	376	398	398	403	408	435	455	470	460	455	455	475	475	430	1.208	0.609485	0	0.001				0.0003	0.0013	0.0013	0.0013		Belarus	1.45756e-06	1.39364e-06	1.4374e-06	1.50854e-06	1.40554e-06	1.4409e-06	2.25298e-06	2.11161e-06	2.18377e-06	2.0763e-06	1.98513e-06	1.85746e-06	1.68434e-06	1.80966e-06	1.76229e-06		Belarus	1.45756e-06	1.39364e-06	1.4374e-06	1.50854e-06
Belgium	43	47	49	50	41	38	10	0	15	5	15	25	35	35	25	1.47	0.741675	0.027938	0.00335428	0.000486604	0.00568933	0.000388821	0.0003	0.010219	0.0103997	0.0381571		Belgium	1.29557e-06	1.3936e-06	1.41569e-06	1.51607e-06	1.14393e-06	1.07358e-06	4.14328e-07	0	5.57542e-07	1.80543e-07	5.23535e-07	8.16443e-07	9.92847e-07	1.06672e-06	8.19644e-07		Belgium	4.75351e-06	5.1132e-06	5.19425e-06	5.56256e-06
Belize	0	0	0	0	0	0	0	0	0	0	0	0	0	0	0	2.007	1.01261	0.109808	0.00075	0.01	0.05		0.0003	0.06105	0.06105	0.170858		Belize	0	0	0	0	0	0	0	0	0	0	0	0	0	0	0		Belize	0	0	0	0
Benin	0	0	0	0	0	0	0	0	0	0	0	0	0	0	0	4.556	2.29869	0.406157	0.002	0.102	0.228		0.0003	0.3323	0.3323	0.738457		Benin	0	0	0	0	0	0	0	0	0	0	0	0	0	0	0		Benin	0	0	0	0
Bhutan	2	1	0	0	0	0	0	0	0	0	0	0	0	0	0	1.462	0.737639	0.95976	0.00075			0.04	0.0003	0.04105	0.04105	1.00081		Bhutan	2.37856e-07	1.1704e-07	0	0	0	0	0	0	0	0	0	0	0	0	0		Bhutan	5.799e-06	2.85346e-06	0	0
Bolivia, Plurinational State of	7	9	8	11	16	18	5	5	5	0	5	0	5	10	10	2.547	1.28507	0.0590913	0.02				0.0003	0.0203	0.0203	0.0793913		Bolivia, Plurinational State of	4.11685e-07	5.20905e-07	4.51167e-07	6.51056e-07	8.71388e-07	9.92658e-07	4.0438e-07	3.62348e-07	3.6277e-07	0	3.40643e-07	0	2.7686e-07	5.94918e-07	6.39971e-07		Bolivia, Plurinational State of	1.61006e-06	2.03721e-06	1.76447e-06	2.54622e-06
Bosnia and Herzegovina	169	165	167	183	186	189	225	235	250	280	320	365	380	390	435	1.486	0.749748	0.0198911	0.015				0.0003	0.0153	0.0153	0.0351911		Bosnia and Herzegovina	7.49116e-06	7.19772e-06	7.09838e-06	8.16342e-06	7.63484e-06	7.85569e-06	1.37151e-05	1.28357e-05	1.36709e-05	1.48744e-05	1.64314e-05	1.75368e-05	1.58587e-05	1.74871e-05	2.09819e-05		Bosnia and Herzegovina	1.72302e-05	1.65553e-05	1.63268e-05	1.87765e-05
Botswana	0	0	0	1	1	1	0	0	0	0	0	0	0	0	0	2.732	1.37841	0.124804	0.00075		0		0.0003	0.00105	0.00105	0.125854		Botswana	0	0	0	3.06139e-09	2.81699e-09	2.85247e-09	0	0	0	0	0	0	0	0	0		Botswana	0	0	0	3.66942e-07
Brazil	153	168	168	166	184	187	190	210	255	265	300	295	325	350	395	1.619	0.816852	0.0596709	0.01	0.00616	0.02684		0.0003	0.0433	0.0433	0.102971		Brazil	1.91933e-05	2.07404e-05	2.02092e-05	2.09568e-05	2.13748e-05	2.19969e-05	3.27767e-05	3.24614e-05	3.94633e-05	3.98403e-05	4.35956e-05	4.01121e-05	3.83853e-05	4.44137e-05	5.39199e-05		Brazil	4.56433e-05	4.93223e-05	4.80591e-05	4.9837e-05
British Overseas Territories	0	0	0	2	1	1	0	0	0	0	0	0	0	0	0	n.a.		0.172628	0.01	0.02	0.08		0.0003	0.1103	0.1103	0.282928		British Overseas Territories	0	0	0	6.43184e-07	2.95918e-07	2.99645e-07	0	0	0	0	0	0	0	0	0		British Overseas Territories	0	0	0	1.64982e-06
Brunei Darussalam	0	0	0	0	0	0	0	0	0	0	0	0	0	0	0	1.747	0.881433	0.2431	0.03			0.01	0.0003	0.0403	0.0403	0.2834		Brunei Darussalam	0	0	0	0	0	0	0	0	0	0	0	0	0	0	0		Brunei Darussalam	0	0	0	0
Bulgaria	282	314	352	399	486	567	710	735	810	905	970	1070	1085	1090	1085	1.81	0.913219	0	0.03				0.0003	0.0303	0.0303	0.0303		Bulgaria	2.4755e-05	2.71264e-05	2.96304e-05	3.52489e-05	3.9507e-05	4.6672e-05	8.57087e-05	7.95041e-05	8.77189e-05	9.52095e-05	9.86389e-05	0.00010181	8.96739e-05	9.67899e-05	0.000103642		Bulgaria	2.4755e-05	2.71264e-05	2.96304e-05	3.52489e-05
Burkina Faso	2	2	2	2	1	2	0	0	0	0	0	0	0	0	0	4.186	2.11201	0.405591	0.012	0.167	0.086		0.0003	0.2653	0.2653	0.670891		Burkina Faso	1.53723e-06	1.51282e-06	1.47407e-06	1.54702e-06	7.11759e-07	1.44145e-06	0	0	0	0	0	0	0	0	0		Burkina Faso	3.88735e-06	3.82562e-06	3.72764e-06	3.91212e-06
Burundi	0	0	1	1	2	2	0	0	0	0	0	0	0	0	0	4.878	2.46115	0.382204	0.00075		0.189		0.0003	0.19005	0.19005	0.572254		Burundi	0	0	5.27982e-07	5.54112e-07	1.01975e-06	1.03259e-06	0	0	0	0	0	0	0	0	0		Burundi	0	0	1.58979e-06	1.66847e-06
Cape Verde	0	0	0	0	0	1	0	0	0	0	0	0	0	0	0	1.522	0.767911	0.36	0.00075		0.042		0.0003	0.04305	0.04305	0.40305		Cape Verde	0	0	0	0	0	1.16951e-07	0	0	0	0	0	0	0	0	0		Cape Verde	0	0	0	0
Chile	27	28	29	33	36	34	20	35	30	15	30	25	45	50	50	1.167	0.588799	0.0198931	0.01				0.0003	0.0103	0.0103	0.0301931		Chile	8.05698e-07	8.22271e-07	8.29826e-07	9.91016e-07	9.94799e-07	9.51365e-07	8.20713e-07	1.28696e-06	1.10439e-06	5.36435e-07	1.03703e-06	8.08616e-07	1.26428e-06	1.50927e-06	1.62357e-06		Chile	2.36179e-06	2.41038e-06	2.43252e-06	2.90503e-06
China	392	422	476	517	539	598	680	680	745	780	760	800	795	795	870	0.999	0.504036	0.112521	0.0101174	0	0	0.000210548	0.0003	0.010628	0.0241609	0.123149		China	2.74391e-05	2.907e-05	3.195e-05	3.64194e-05	3.49379e-05	3.92505e-05	6.54554e-05	5.86518e-05	6.43331e-05	6.54329e-05	6.16254e-05	6.06971e-05	5.2393e-05	5.62912e-05	6.62668e-05		China	0.000139858	0.00014817	0.00016285	0.000185631
Costa Rica	8	7	8	8	11	13	0	5	5	0	0	5	5	10	5	1.33	0.671039	0.0446649	0.00075	0.002	0.02		0.0003	0.02305	0.02305	0.0677149		Costa Rica	5.34235e-07	4.60033e-07	5.12286e-07	5.37639e-07	6.80235e-07	8.14039e-07	0	4.11434e-07	4.11914e-07	0	0	3.61915e-07	3.14365e-07	6.7551e-07	3.63333e-07		Costa Rica	1.56944e-06	1.35146e-06	1.50496e-06	1.57944e-06
Côte d'Ivoire	0	0	1	2	1	1	0	0	0	0	0	0	0	0	0	4.283	2.16095	0.389764	0.039	0.063	0.084		0.0003	0.1863	0.1863	0.576064		Côte d'Ivoire	0	0	5.17564e-07	1.08636e-06	4.99814e-07	5.06109e-07	0	0	0	0	0	0	0	0	0		Côte d'Ivoire	0	0	1.60038e-06	3.35916e-06
Denmark	37	35	40	49	56	53	30	30	35	30	15	25	20	25	15	1.5	0.756811		0.00225396	8.50554e-05	0.000687419	0.000628425	0.0003	0.00395486	0.00417812	0.00395486		Denmark	4.47872e-07	4.16936e-07	4.64294e-07	5.96907e-07	6.27718e-07	6.01573e-07	4.99374e-07	4.47468e-07	5.22655e-07	4.35203e-07	2.10332e-07	3.2801e-07	2.27932e-07	3.06113e-07	1.97577e-07		Denmark	4.2394e-07	3.94656e-07	4.39484e-07	5.65011e-07
Dominica	0	1	1	0	0	0	0	0	0	0	0	0	0	0	0	1.484	0.748739	0.328911	0.0075	0.015	0.16		0.0003	0.1828	0.1828	0.511711		Dominica	0	5.2119e-07	5.07841e-07	0	0	0	0	0	0	0	0	0	0	0	0		Dominica	0	1.45896e-06	1.4216e-06	0
Dominican Republic	36	32	31	39	41	34	25	20	25	20	25	25	25	15	20	2.243	1.13169	0.252813	0.01	0.03	0.12		0.0003	0.1603	0.1603	0.413113		Dominican Republic	1.67189e-05	1.46252e-05	1.38053e-05	1.82275e-05	1.76325e-05	1.48062e-05	1.5966e-05	1.14452e-05	1.43232e-05	1.11315e-05	1.34495e-05	1.25846e-05	1.09312e-05	7.0467e-06	1.01071e-05		Dominican Republic	4.30866e-05	3.7691e-05	3.5578e-05	4.69746e-05
Djibouti	0	0	0	0	2	2	0	0	0	0	0	0	0	0	0	2.609	1.31635	0.0196773	0.00075				0.0003	0.00105	0.00105	0.0207273		Djibouti	0	0	0	0	5.63397e-09	5.70493e-09	0	0	0	0	0	0	0	0	0		Djibouti	0	0	0	0
Ecuador	13	16	18	17	18	21	10	15	5	10	15	20	20	15	15	1.823	0.919778	0.0224466	0.01		0.01		0.0003	0.0203	0.0203	0.0427466		Ecuador	7.64558e-07	9.26053e-07	1.01513e-06	1.00618e-06	9.80312e-07	1.1581e-06	8.0876e-07	1.08704e-06	3.6277e-07	7.04831e-07	1.02193e-06	1.27494e-06	1.10744e-06	8.92376e-07	9.59957e-07		Ecuador	1.60996e-06	1.95003e-06	2.1376e-06	2.11875e-06
El Salvador	5	3	4	9	12	12	0	0	0	0	0	0	0	0	0	1.775	0.89556	0.0340384	0.00075		0.0152		0.0003	0.01625	0.01625	0.0502884		El Salvador	2.35394e-07	1.38993e-07	1.80578e-07	4.26408e-07	5.23155e-07	5.29744e-07	0	0	0	0	0	0	0	0	0		El Salvador	7.28466e-07	4.30139e-07	5.5883e-07	1.31959e-06
Eritrea	3	1	2	2	71	122	180	220	235	215	220	245	260	285	295	3.713	1.87336	0.0198931	0.005		0.001		0.0003	0.0063	0.0063	0.0261931		Eritrea	5.47562e-08	1.79622e-08	3.50044e-08	3.67367e-08	1.20004e-06	2.08801e-06	4.5179e-06	4.94792e-06	5.29144e-06	4.70292e-06	4.65154e-06	4.84699e-06	4.46794e-06	5.26194e-06	5.85905e-06		Eritrea	2.27656e-07	7.46803e-08	1.45535e-07	1.52738e-07
Estonia	32	35	39	47	40	49	35	30	35	40	35	40	45	30	40	1.31	0.660949	0	0.001				0.0003	0.0013	0.0013	0.0013		Estonia	1.20521e-07	1.29727e-07	1.40851e-07	1.78144e-07	1.39508e-07	1.7305e-07	1.81274e-07	1.39227e-07	1.62621e-07	1.80548e-07	1.52702e-07	1.63293e-07	1.59569e-07	1.14294e-07	1.63934e-07		Estonia	1.20521e-07	1.29727e-07	1.40851e-07	1.78144e-07
Eswatini	0	0	0	0	0	0	0	0	0	0	0	0	0	0	0	2.753	1.389	0.125125	0.00075		0.005		0.0003	0.00605	0.00605	0.131175		Eswatini	0	0	0	0	0	0	0	0	0	0	0	0	0	0	0		Eswatini	0	0	0	0
Fiji	0	0	0	0	0	0	0	0	0	0	0	0	0	0	0	2.281	1.15086	0.351975	0.00075				0.0003	0.00105	0.00105	0.353025		Fiji	0	0	0	0	0	0	0	0	0	0	0	0	0	0	0		Fiji	0	0	0	0
Finland	27	30	35	35	34	34	25	20	30	30	40	45	45	45	45	1.26	0.635721	0.00254627	0.00132379	3.54355e-05	0.000261161	0.000288624	0.0003	0.00220901	0.00232607	0.00475527		Finland	1.81953e-07	1.98959e-07	2.26174e-07	2.37367e-07	2.12177e-07	2.14849e-07	2.31679e-07	1.66078e-07	2.49408e-07	2.42289e-07	3.1226e-07	3.28701e-07	2.85515e-07	3.06758e-07	3.2999e-07		Finland	3.71972e-07	4.0674e-07	4.62376e-07	4.85259e-07
France	229	229	252	265	277	298	320	315	320	345	345	385	410	460	455	1.66	0.837538	0.0311626	0.00305514	0.000636213	0.00540286	0.00145195	0.0003	0.0108462	0.0110525	0.0420087		France	7.33275e-06	7.21632e-06	7.73771e-06	8.53957e-06	8.21364e-06	8.94763e-06	1.40908e-05	1.24288e-05	1.26408e-05	1.32394e-05	1.27971e-05	1.33625e-05	1.23606e-05	1.48997e-05	1.58539e-05		France	2.78706e-05	2.7428e-05	2.94098e-05	3.24575e-05
Gabon	0	0	0	0	0	2	0	0	0	0	0	0	0	0	0	3.647	1.84006	0.6864	0.00075	0.001	0.252		0.0003	0.25405	0.25405	0.94045		Gabon	0	0	0	0	0	1.38032e-06	0	0	0	0	0	0	0	0	0		Gabon	0	0	0	0
Gambia	5	5	3	2	2	3	0	0	0	0	0	0	0	5	5	4.006	2.02119	0.389764	0.00075	0.016	0.136		0.0003	0.15305	0.15305	0.542814		Gambia	2.21704e-06	2.18184e-06	1.27558e-06	8.92469e-07	8.21219e-07	1.24734e-06	0	0	0	0	0	0	0	2.24266e-06	2.4125e-06		Gambia	7.86307e-06	7.73821e-06	4.52401e-06	3.16527e-06
Georgia	50	57	60	62	64	77	70	100	125	145	125	190	210	195	175	1.81	0.913219	0.019899	0.03				0.0003	0.0303	0.0303	0.050199		Georgia	4.38918e-06	4.92422e-06	5.05063e-06	5.47727e-06	5.20257e-06	6.33818e-06	8.45015e-06	1.08169e-05	1.35369e-05	1.52546e-05	1.27112e-05	1.80785e-05	1.73562e-05	1.73156e-05	1.67165e-05		Georgia	7.27171e-06	8.15811e-06	8.36754e-06	9.07437e-06
Ghana	12	14	16	15	16	22	15	25	20	35	40	60	60	80	95	3.397	1.71393	0.405968	0.003	0.112	0.158		0.0003	0.2733	0.2733	0.679268		Ghana	9.5015e-06	1.09091e-05	1.21482e-05	1.19526e-05	1.17315e-05	1.6334e-05	1.63326e-05	2.43915e-05	1.9536e-05	3.32121e-05	3.66888e-05	5.14939e-05	4.47285e-05	6.40753e-05	8.18517e-05		Ghana	2.36153e-05	2.71137e-05	3.01935e-05	2.97072e-05
Grenada	0	0	0	0	0	0	0	0	0	0	0	0	0	0	0	1.487	0.750252	0.213231	0.01	0.02	0.1		0.0003	0.1303	0.1303	0.343531		Grenada	0	0	0	0	0	0	0	0	0	0	0	0	0	0	0		Grenada	0	0	0	0
Greece	162	173	198	236	252	275	335	330	330	360	385	395	415	425	435	1.32	0.665994	0.00957832	0.00468454	2.35023e-05	0.00245686	4.03832e-05	3.20226e-05	0.0072373	0.00727335	0.0168156		Greece	3.41366e-06	3.58757e-06	4.00084e-06	5.00468e-06	4.91734e-06	5.43373e-06	9.70741e-06	8.56856e-06	8.57855e-06	9.0913e-06	9.39786e-06	9.02187e-06	8.23335e-06	9.05908e-06	9.97443e-06		Greece	7.89222e-06	8.29428e-06	9.24974e-06	1.15706e-05
Guatemala	3	3	6	3	4	3	0	0	0	0	0	0	5	0	0	2.311	1.16599	0.0336926	0.00075				0.0003	0.00105	0.00105	0.0347426		Guatemala	9.12603e-09	8.98111e-09	1.75022e-08	9.18418e-09	1.12679e-08	8.5574e-09	0	0	0	0	0	0	1.43203e-08	0	0		Guatemala	3.01964e-07	2.97169e-07	5.79116e-07	3.03888e-07
Guinea	6	7	8	8	10	10	0	0	0	5	5	5	10	15	15	4.217	2.12765	0.405205	0.00075		0.227		0.0003	0.22805	0.22805	0.633255		Guinea	3.96417e-06	4.55143e-06	5.06841e-06	5.31924e-06	6.11823e-06	6.19528e-06	0	0	0	3.95903e-06	3.82678e-06	3.58068e-06	6.22048e-06	1.00249e-05	1.07841e-05		Guinea	1.10078e-05	1.26385e-05	1.40741e-05	1.47706e-05
Guinea-Bissau	0	0	0	0	0	0	0	0	0	0	0	0	0	0	0	3.836	1.93542	0.405205	0.00075	0.002	0.076		0.0003	0.07905	0.07905	0.484255		Guinea-Bissau	0	0	0	0	0	0	0	0	0	0	0	0	0	0	0		Guinea-Bissau	0	0	0	0
Guyana	0	0	0	0	0	0	0	0	0	0	0	0	0	0	0	2.412	1.21695	0.109685	0.00075	0.01	0.05		0.0003	0.06105	0.06105	0.170735		Guyana	0	0	0	0	0	0	0	0	0	0	0	0	0	0	0		Guyana	0	0	0	0
Haiti	0	1	3	3	4	5	0	0	0	0	0	0	0	0	0	2.656	1.34006	0.213231	0.01	0.03	0.1		0.0003	0.1403	0.1403	0.353531		Haiti	0	4.00016e-07	1.16931e-06	1.22718e-06	1.50561e-06	1.90572e-06	0	0	0	0	0	0	0	0	0		Haiti	0	1.00797e-06	2.94646e-06	3.09228e-06
Honduras	1	2	3	4	3	1	0	0	0	0	0	0	5	15	15	2.5	1.26135	0.0336926	0.00075	0.0004	0.0016		0.0003	0.00305	0.00305	0.0367426		Honduras	8.83631e-09	1.7392e-08	2.54198e-08	3.55705e-08	2.4548e-08	8.28573e-09	0	0	0	0	0	0	4.15972e-08	1.34076e-07	1.4423e-07		Honduras	1.06449e-07	2.09517e-07	3.06227e-07	4.28509e-07
Hong Kong	0	0	0	0	2	1	0	0	0	0	0	0	0	0	0	0.751	0.37891	0.201389	0.03				0.0003	0.0303	0.07727	0.231689		Hong Kong	0	0	0	0	4.14607e-07	2.09914e-07	0	0	0	0	0	0	0	0	0		Hong Kong	0	0	0	0
India	98	109	131	145	160	191	210	260	310	395	445	530	835	1160	1580	1.975	0.996468	0.495591	0.0156702	0	0.0193568	0.00972176	0.0003	0.0450487	0.0450487	0.54064		India	1.27903e-05	1.4e-05	1.63948e-05	1.9045e-05	1.93374e-05	2.33747e-05	3.76899e-05	4.18134e-05	4.99125e-05	6.17829e-05	6.72784e-05	7.49762e-05	0.000102604	0.000153144	0.00022439		India	0.000153499	0.000168017	0.000196757	0.000228563
Indonesia	43	46	53	60	60	68	90	115	105	125	150	165	180	205	225	2.127	1.07316	0.0784	0.039651	0	0	0.0187238	0.0003	0.0586748	0.0586748	0.137075		Indonesia	7.30956e-06	7.69537e-06	8.63932e-06	1.02644e-05	9.44493e-06	1.08391e-05	2.10387e-05	2.40885e-05	2.20195e-05	2.54654e-05	2.95377e-05	3.04019e-05	2.88083e-05	3.52506e-05	4.16197e-05		Indonesia	1.70764e-05	1.79777e-05	2.0183e-05	2.39794e-05
Iraq	79	89	104	103	102	93	95	105	150	225	245	365	400	385	365	3.249	1.63925	0.231914	0.03		0.03		0.0003	0.0603	0.0603	0.292214		Iraq	1.38012e-05	1.53013e-05	1.74222e-05	1.81086e-05	1.65011e-05	1.52346e-05	2.28226e-05	2.2603e-05	3.23276e-05	4.71074e-05	4.95812e-05	6.91155e-05	6.57917e-05	6.8036e-05	6.93864e-05		Iraq	6.68805e-05	7.41499e-05	8.44279e-05	8.77542e-05
Iran, Islamic Republic of	73	106	125	130	156	214	410	500	635	700	725	745	865	980	1080	1.695	0.855197	0.125064	0.03		0.01		0.0003	0.0403	0.0403	0.165364		Iran, Islamic Republic of	8.52313e-06	1.21795e-05	1.39948e-05	1.52749e-05	1.68665e-05	2.34288e-05	6.58283e-05	7.19341e-05	9.14627e-05	9.79472e-05	9.80566e-05	9.42815e-05	9.50856e-05	0.000115742	0.000137212		Iran, Islamic Republic of	3.49732e-05	4.99766e-05	5.74252e-05	6.26778e-05
Ireland	19	16	23	27	29	32	15	10	15	25	20	20	55	55	40	1.5	0.756811	0.0113288	0.00141037	0.000200032	0.000962482	0.000135415	0.0003	0.0030083	0.00317552	0.0143371		Ireland	1.74799e-07	1.44862e-07	2.02906e-07	2.49982e-07	2.47063e-07	2.76055e-07	1.89771e-07	1.13364e-07	1.70244e-07	2.75641e-07	2.13147e-07	1.99439e-07	4.764e-07	5.11845e-07	4.00442e-07		Ireland	7.89198e-07	6.54035e-07	9.16095e-07	1.12864e-06
Iceland	2	2	3	2	3	5	0	0	0	0	0	0	0	0	0	1.59	0.80222	0	0.001				0.0003	0.0013	0.0013	0.0013		Iceland	7.53259e-09	7.41298e-09	1.08347e-08	7.58059e-09	1.04631e-08	1.76581e-08	0	0	0	0	0	0	0	0	0		Iceland	7.53259e-09	7.41298e-09	1.08347e-08	7.58059e-09
Israel	20	20	24	28	33	30	15	20	10	10	20	25	15	40	45	2.85	1.43794	0.0591	0.005				0.0003	0.0053	0.0053	0.0644		Israel	3.07098e-07	3.02222e-07	3.53377e-07	4.32677e-07	4.6923e-07	4.31945e-07	3.16731e-07	3.78412e-07	1.89427e-07	1.8402e-07	3.55746e-07	4.16084e-07	2.16851e-07	6.21293e-07	7.51887e-07		Israel	3.73153e-06	3.67228e-06	4.29387e-06	5.25743e-06
Italy	197	202	248	277	318	351	385	350	415	475	485	565	630	655	635	1.2	0.605449	0.00568991	0.0319977	0.000175553	0.00223009	7.49446e-05	0.0003	0.0347783	0.0348457	0.0404682		Italy	1.98878e-05	2.00688e-05	2.40078e-05	2.81422e-05	2.97284e-05	3.32267e-05	5.34483e-05	4.35388e-05	5.16848e-05	5.74688e-05	5.67185e-05	6.18248e-05	5.98803e-05	6.68885e-05	6.97569e-05		Italy	2.30967e-05	2.33069e-05	2.78815e-05	3.26831e-05
Jamaica	4	7	7	9	9	8	0	0	0	0	0	0	0	5	0	1.358	0.685166	0.251775	0.01	0.04	0.11		0.0003	0.1603	0.1603	0.412075		Jamaica	1.85765e-06	3.19927e-06	3.11733e-06	4.20635e-06	3.87054e-06	3.48381e-06	0	0	0	0	0	0	0	2.3489e-06	0		Jamaica	4.77537e-06	8.22421e-06	8.01357e-06	1.08131e-05
Japan	54	67	73	66	74	88	95	75	105	100	85	80	105	110	120	1.2	0.605449	0	0.00075				0.0003	0.00105	0.00105	0.00105		Japan	1.64268e-07	2.00578e-07	2.12943e-07	2.02052e-07	2.08457e-07	2.51017e-07	3.97408e-07	2.81132e-07	3.94043e-07	3.64568e-07	2.99531e-07	2.63782e-07	3.00727e-07	3.38488e-07	3.97224e-07		Japan	1.64268e-07	2.00578e-07	2.12943e-07	2.02052e-07
Yemen	13	11	9	9	10	9	5	10	10	30	30	35	55	75	70	4.59	2.31584	0.556721	0.0236		0.0095		0.0003	0.0334	0.0334	0.590121		Yemen	1.25794e-06	1.04751e-06	8.35104e-07	8.76433e-07	8.9607e-07	8.1662e-07	6.65335e-07	1.19236e-06	1.19375e-06	3.47902e-06	3.3628e-06	3.67096e-06	5.01075e-06	7.34122e-06	7.3707e-06		Yemen	2.22257e-05	1.85078e-05	1.47549e-05	1.54851e-05
Jordan	14	12	12	17	19	28	10	20	10	15	35	40	40	55	60	2.639	1.33148	0.240555	0.035		0.0022		0.0003	0.0375	0.0375	0.278055		Jordan	1.521e-06	1.28302e-06	1.25016e-06	1.8587e-06	1.91153e-06	2.85247e-06	1.49402e-06	2.67745e-06	1.34028e-06	1.95304e-06	4.40487e-06	4.71039e-06	4.09152e-06	6.04442e-06	7.09328e-06		Jordan	1.1278e-05	9.51332e-06	9.26966e-06	1.37819e-05
Yugoslavia, Federal Republic of (April 27, 1992-February 4, 2003)	120	41	35	34	34	42	15	30	25	30	20	15	25	15	20	n.a.												Yugoslavia, Federal Republic of (April 27, 1992-February 4, 2003)																	Yugoslavia, Federal Republic of (April 27, 1992-February 4, 2003)
Yugoslavia, Socialist Federal Republic (until 04/26/1992)	0	0	0	0	0	0	0	0	0	0	0	0	0	0	0	n.a.												Yugoslavia, Socialist Federal Republic (until 04/26/1992)																	Yugoslavia, Socialist Federal Republic (until 04/26/1992)
Cambodia	6	6	6	8	7	7	0	5	0	0	0	0	0	5	5	2.579	1.30121	0.4228	0.03			0.3	0.0003	0.3303	0.343876	0.7531		Cambodia	5.97756e-06	5.88265e-06	5.73198e-06	8.02087e-06	6.45796e-06	6.5393e-06	0	6.13806e-06	0	0	0	0	0	5.03886e-06	5.42046e-06		Cambodia	1.30911e-05	1.28832e-05	1.25532e-05	1.7566e-05
Cameroon	130	130	130	129	166	242	345	430	445	445	450	440	470	575	660	4.322	2.18063	0.406346	0.002	0.003	0.2		0.0003	0.2053	0.2053	0.611646		Cameroon	7.73221e-05	7.60943e-05	7.41453e-05	7.72162e-05	9.14308e-05	0.000134969	0.000282184	0.00031515	0.000326523	0.000317203	0.000310052	0.000283666	0.000263197	0.000345953	0.000427167		Cameroon	0.000230364	0.000226706	0.000220899	0.000230048
Canada	45	50	51	56	56	66	50	35	30	45	55	60	40	80	90	1.26	0.635721	0.0408197	0.00503104	0.000969899	0.00475696	0.00246564	0.000299766	0.0135233	0.0152271	0.054343		Canada	1.98519e-06	2.17074e-06	2.15745e-06	2.4862e-06	2.28772e-06	2.7302e-06	3.03328e-06	1.90259e-06	1.6327e-06	2.37914e-06	2.8107e-06	2.86903e-06	1.66139e-06	3.57001e-06	4.32042e-06		Canada	7.0848e-06	7.747e-06	7.69955e-06	8.87282e-06
Kazakhstan	379	354	340	330	303	299	280	280	265	270	255	265	265	255	255	3.012	1.51968	0.0687378	0.00075				0.0003	0.00105	0.00105	0.0697878		Kazakhstan	1.15292e-06	1.05977e-06	9.9179e-07	1.01026e-06	8.53547e-07	8.52887e-07	1.17131e-06	1.04956e-06	9.94491e-07	9.84333e-07	8.98593e-07	8.73777e-07	7.58978e-07	7.84676e-07	8.441e-07		Kazakhstan	7.66285e-05	7.04373e-05	6.59189e-05	6.71465e-05
Qatar	0	0	0	0	0	0	0	0	0	0	0	0	0	0	0	1.729	0.872351	0.231914	0.03		0.03		0.0003	0.0603	0.0603	0.292214		Qatar	0	0	0	0	0	0	0	0	0	0	0	0	0	0	0		Qatar	0	0	0	0
Kenya	294	328	345	364	391	421	445	520	630	700	700	700	710	925	1000	3.208	1.61857	0.406911	0.0015		0.1666		0.0003	0.1684	0.1684	0.575311		Kenya	0.000143437	0.000157484	0.000161403	0.00017872	0.00017665	0.0001926	0.000298556	0.000312612	0.000379182	0.000409288	0.000395616	0.000370173	0.000326133	0.000456504	0.000530892		Kenya	0.000490029	0.000538018	0.000551409	0.000610568
Kyrgyzstan	69	61	58	54	50	49	25	20	15	30	30	55	65	85	85	2.7	1.36226	0.0678496	0.00075				0.0003	0.00105	0.00105	0.0688996		Kyrgyzstan	2.09899e-07	1.82616e-07	1.69188e-07	1.65315e-07	1.40849e-07	1.39771e-07	1.04581e-07	7.49685e-08	5.62919e-08	1.0937e-07	1.05717e-07	1.8135e-07	1.86164e-07	2.61559e-07	2.81367e-07		Kyrgyzstan	1.37733e-05	1.1983e-05	1.11019e-05	1.08478e-05
Kiribati	0	0	0	0	0	0	0	0	0	0	0	0	0	0	0	3.147	1.58779	0.0199	0.00075				0.0003	0.00105	0.00105	0.02095		Kiribati	0	0	0	0	0	0	0	0	0	0	0	0	0	0	0		Kiribati	0	0	0	0
Colombia	71	75	87	97	93	108	100	140	135	160	145	190	210	220	210	1.645	0.82997	0.0759438	0.00860084	0.0254645	0.0328902	0.000187691	0.0003	0.0674432	0.0701326	0.143387		Colombia	1.44261e-05	1.49969e-05	1.69508e-05	1.98345e-05	1.74984e-05	2.05767e-05	2.79411e-05	3.50516e-05	3.38391e-05	3.89609e-05	3.41289e-05	4.18445e-05	4.01729e-05	4.52172e-05	4.64306e-05		Colombia	2.94944e-05	3.06613e-05	3.46562e-05	4.05519e-05
Comoros	0	0	0	0	0	0	0	0	0	0	0	0	0	0	0	3.878	1.95661	0.234375	0.01		0.008		0.0003	0.0183	0.0183	0.252675		Comoros	0	0	0	0	0	0	0	0	0	0	0	0	0	0	0		Comoros	0	0	0	0
Congo, Democratic Republic	20	21	21	18	18	16	5	10	10	5	5	5	0	0	0	6.051	3.05298	0.690864	0.00075		0.186		0.0003	0.18705	0.18705	0.877914		Congo, Democratic Republic	1.08382e-05	1.11994e-05	1.09126e-05	9.81657e-06	9.03287e-06	8.13034e-06	3.72607e-06	6.67755e-06	6.68534e-06	3.24726e-06	3.13878e-06	2.93693e-06	0	0	0		Congo, Democratic Republic	5.0869e-05	5.25643e-05	5.1218e-05	4.60738e-05
Congo, Republic	4	4	5	7	9	11	0	0	0	0	0	0	0	0	0	4.157	2.09738	0.690864	0.00075		0.251		0.0003	0.25205	0.25205	0.942914		Congo, Republic	2.92091e-06	2.87453e-06	3.50113e-06	5.14416e-06	6.0859e-06	7.532e-06	0	0	0	0	0	0	0	0	0		Congo, Republic	1.09271e-05	1.07535e-05	1.30977e-05	1.92442e-05
Korea, Democratic People's Republic	1	0	0	0	0	2	0	0	0	0	0	0	0	0	0	1.78	0.898083	0	0.00075				0.0003	0.00105	0.00105	0.00105		Korea, Democratic People's Republic	3.04201e-09	0	0	0	0	5.70493e-09	0	0	0	0	0	0	0	0	0		Korea, Democratic People's Republic	3.04201e-09	0	0	0
Korea, Republic	44	45	48	52	60	67	60	70	75	110	115	135	175	220	255	0.721	0.363774	0	0.00075				0.0003	0.00105	0.00105	0.00105		Korea, Republic	1.33848e-07	1.34717e-07	1.40017e-07	1.59192e-07	1.69019e-07	1.91115e-07	2.50995e-07	2.6239e-07	2.8146e-07	4.01025e-07	4.05248e-07	4.45131e-07	5.01212e-07	6.76975e-07	8.441e-07		Korea, Republic	1.33848e-07	1.34717e-07	1.40017e-07	1.59192e-07
Kosovo	80	115	117	138	150	157	140	145	180	205	205	225	240	275	300	1.545	0.779516											Kosovo																	Kosovo
Croatia	91	94	99	112	131	180	205	175	255	245	275	315	300	305	280	1.46	0.73663	0.0198911	0.005				0.0003	0.0053	0.0053	0.0251911		Croatia	1.3973e-06	1.42044e-06	1.45768e-06	1.73071e-06	1.8627e-06	2.59167e-06	4.32866e-06	3.31111e-06	4.83038e-06	4.50849e-06	4.8915e-06	5.24266e-06	4.33701e-06	4.73736e-06	4.67841e-06		Croatia	6.6414e-06	6.75141e-06	6.92841e-06	8.22611e-06
Cuba	101	103	101	110	123	119	110	110	110	130	120	105	95	105	80	1.439	0.726034	0.251775	0.005	0.017	0.083		0.0003	0.1053	0.1053	0.357075		Cuba	3.08121e-05	3.09233e-05	2.95462e-05	3.37715e-05	3.47479e-05	3.40413e-05	4.61472e-05	4.13505e-05	4.13987e-05	4.75292e-05	4.24076e-05	3.47203e-05	2.72864e-05	3.24025e-05	2.65572e-05		Cuba	0.000104485	0.000104862	0.000100192	0.00011452
Kuwait	0	0	0	0	0	0	0	0	0	0	0	0	0	0	0	1.524	0.76892	0.23198	0.00075		0.04		0.0003	0.04105	0.04105	0.27303		Kuwait	0	0	0	0	0	0	0	0	0	0	0	0	0	0	0		Kuwait	0	0	0	0
Laos, People's Democratic Republic	3	4	3	4	6	5	0	0	0	0	0	0	0	0	0	2.421	1.22149	0.407512	0.0204	0	0	0.272	0.0003	0.2927	0.301158	0.700212		Laos, People's Democratic Republic	2.6175e-06	3.43458e-06	2.50996e-06	3.51224e-06	4.84776e-06	4.09068e-06	0	0	0	0	0	0	0	0	0		Laos, People's Democratic Republic	6.08586e-06	7.98563e-06	5.83583e-06	8.16619e-06
Lesotho	0	0	0	0	0	0	0	0	0	0	0	0	0	0	0	2.694	1.35923	0.12448	0.00075				0.0003	0.00105	0.00105	0.12553		Lesotho	0	0	0	0	0	0	0	0	0	0	0	0	0	0	0		Lesotho	0	0	0	0
Latvia	101	123	136	143	161	171	165	155	165	185	195	210	215	230	215	1.36	0.686176	0	0.001				0.0003	0.0013	0.0013	0.0013		Latvia	3.80396e-07	4.55898e-07	4.91172e-07	5.42012e-07	5.61519e-07	6.03908e-07	8.54577e-07	7.19341e-07	7.66642e-07	8.35034e-07	8.50769e-07	8.5729e-07	7.62387e-07	8.76258e-07	8.81143e-07		Latvia	3.80396e-07	4.55898e-07	4.91172e-07	5.42012e-07
Lebanon	41	43	48	46	50	73	85	100	90	105	120	135	140	130	125	2.239	1.12967	0.0296036	0.03		0.01		0.0003	0.0403	0.0403	0.0699036		Lebanon	4.78696e-06	4.94075e-06	5.374e-06	5.40496e-06	5.40593e-06	7.99207e-06	1.36473e-05	1.43868e-05	1.29632e-05	1.46921e-05	1.62301e-05	1.70846e-05	1.53896e-05	1.53536e-05	1.58811e-05		Lebanon	8.30337e-06	8.57014e-06	9.32164e-06	9.37534e-06
Liberia	2	1	1	1	1	1	0	0	0	0	0	0	0	0	0	3.95	1.99294	0.406628	0.077	0.009	0.055		0.0003	0.1413	0.1413	0.547928		Liberia	8.18735e-07	4.02867e-07	3.92549e-07	4.11976e-07	3.79086e-07	3.8386e-07	0	0	0	0	0	0	0	0	0		Liberia	3.17486e-06	1.56222e-06	1.52221e-06	1.59755e-06
Libya	0	1	3	6	5	5	0	10	15	30	35	25	55	70	90	2.355	1.18819	0.345434	0.003	0.002	0.02		0.0003	0.0253	0.0253	0.370734		Libya	0	7.2134e-08	2.1086e-07	4.4259e-07	3.3938e-07	3.43654e-07	0	9.03192e-07	1.35637e-06	2.6353e-06	2.97182e-06	1.98621e-06	3.79557e-06	5.19014e-06	7.1784e-06		Libya	0	1.05702e-06	3.08983e-06	6.48549e-06
Liechtenstein	1	1	1	1	1	1	0	0	0	0	0	0	0	0	0	1.45	0.731584	0	0.001				0.0003	0.0013	0.0013	0.0013		Liechtenstein	3.7663e-09	3.70649e-09	3.61156e-09	3.7903e-09	3.4877e-09	3.53162e-09	0	0	0	0	0	0	0	0	0		Liechtenstein	3.7663e-09	3.70649e-09	3.61156e-09	3.7903e-09
Lithuania	136	143	153	154	169	182	195	190	220	200	220	220	225	210	235	1.18	0.595358	0	0.001				0.0003	0.0013	0.0013	0.0013		Lithuania	5.12216e-07	5.30028e-07	5.52569e-07	5.83705e-07	5.89421e-07	6.42756e-07	1.00995e-06	8.81772e-07	1.02219e-06	9.02739e-07	9.59842e-07	8.98113e-07	7.97847e-07	8.00061e-07	9.6311e-07		Lithuania	5.12216e-07	5.30028e-07	5.52569e-07	5.83705e-07
Luxembourg	8	11	9	10	12	14	0	0	5	5	0	5	5	15	15	1.25	0.630676	0.0163591	0.00471612	0.000117695	0.00144637	1.38947e-05	0.0003	0.00659408	0.00676816	0.0229532		Luxembourg	1.56867e-07	2.12267e-07	1.69225e-07	1.97333e-07	2.17895e-07	2.57412e-07	0	0	1.2095e-07	1.17498e-07	0	1.06269e-07	9.23069e-08	2.97524e-07	3.20056e-07		Luxembourg	5.31992e-07	7.19873e-07	5.73902e-07	6.69227e-07
Macau	0	0	0	0	0	0	0	0	0	0	0	0	0	0	0	0.586	0.295661	0.201389	0.03				0.0003	0.0303	0.07727	0.231689		Macau	0	0	0	0	0	0	0	0	0	0	0	0	0	0	0		Macau	0	0	0	0
Madagascar	8	6	7	8	8	8	0	5	0	0	0	10	0	5	30	3.972	2.00404	0.359148	0.0015		0.11695		0.0003	0.11875	0.11875	0.477898		Madagascar	2.7523e-06	2.03145e-06	2.30932e-06	2.76984e-06	2.54871e-06	2.58081e-06	0	2.11965e-06	0	0	0	3.72907e-06	0	1.74007e-06	1.12311e-05		Madagascar	1.10764e-05	8.17535e-06	9.29363e-06	1.11469e-05
Malawi	0	0	0	0	0	1	0	0	0	0	0	0	0	0	0	3.648	1.84057	0.381308	0.0015	0	0.049	0	0.0003	0.0508	0.0508	0.432108		Malawi	0	0	0	0	0	1.38005e-07	0	0	0	0	0	0	0	0	0		Malawi	0	0	0	0
Malaysia	11	9	10	11	15	14	10	0	5	5	5	5	15	20	25	1.55	0.782038	0.264308	0.0165802	0	0	0.0550568	0.0003	0.071937	0.0877329	0.336245		Malaysia	2.79593e-06	2.25125e-06	2.43733e-06	2.81375e-06	3.53061e-06	3.33673e-06	3.49531e-06	0	1.56783e-06	1.52308e-06	1.4722e-06	1.37752e-06	3.58961e-06	5.14225e-06	6.9146e-06		Malaysia	1.07157e-05	8.62814e-06	9.34129e-06	1.07839e-05
Maldives	0	0	0	0	0	0	0	0	0	0	0	0	0	0	0	1.575	0.794652	0.496	0.1734		0.0014	0.0097	0.003	0.1875	0.1875	0.6835		Maldives	0	0	0	0	0	0	0	0	0	0	0	0	0	0	0		Maldives	0	0	0	0
Mali	1	1	2	2	2	2	0	0	0	0	0	0	0	0	0	5.614	2.83249	0.357751	0.00288849	0.0856586	0.147578		0.0003	0.236426	0.236426	0.594176		Mali	6.8496e-07	6.74084e-07	1.31364e-06	1.37865e-06	1.26859e-06	1.28456e-06	0	0	0	0	0	0	0	0	0		Mali	1.72142e-06	1.69408e-06	3.30139e-06	3.46477e-06
Malta	2	2	2	2	3	4	0	0	0	0	0	0	0	0	0	1.06	0.534813	0	0.03				0.0003	0.0303	0.0303	0.0303		Malta	1.75567e-07	1.7278e-07	1.68354e-07	1.76686e-07	2.43871e-07	3.29256e-07	0	0	0	0	0	0	0	0	0		Malta	1.75567e-07	1.7278e-07	1.68354e-07	1.76686e-07
Morocco	34	38	40	41	39	49	50	60	75	105	100	120	155	170	220	2.23	1.12513	0.345434	0.03	0.01	0.015		0.0003	0.0553	0.0553	0.400734		Morocco	5.44722e-06	5.9914e-06	6.14521e-06	6.61057e-06	5.78609e-06	7.36126e-06	1.10159e-05	1.1845e-05	1.48235e-05	2.01606e-05	1.85592e-05	2.08387e-05	2.33803e-05	2.75508e-05	3.83541e-05		Morocco	3.94735e-05	4.34169e-05	4.45315e-05	4.79037e-05
Marshall Islands	0	0	0	0	0	0	0	0	0	0	0	0	0	0	0	2.919	1.47275	0.0199	0.00075				0.0003	0.00105	0.00105	0.02095		Marshall Islands	0	0	0	0	0	0	0	0	0	0	0	0	0	0	0		Marshall Islands	0	0	0	0
Mauritania	0	0	0	0	0	0	0	0	0	0	0	0	0	0	0	4.697	2.36983	0.356592	0.00075	0.012	0.058		0.0003	0.07105	0.07105	0.427642		Mauritania	0	0	0	0	0	0	0	0	0	0	0	0	0	0	0		Mauritania	0	0	0	0
Mauritius	2	3	2	1	3	4	0	0	0	0	0	0	0	0	0	1.39	0.701312	0.238313	0.0358908	0	0.0124892	0.00608871	0.0003	0.0547687	0.0587758	0.293081		Mauritius	3.40565e-07	5.02735e-07	3.26573e-07	1.71367e-07	4.73059e-07	6.38689e-07	0	0	0	0	0	0	0	0	0		Mauritius	1.6982e-06	2.50685e-06	1.62843e-06	8.54511e-07
Mexico	57	60	62	65	79	82	80	95	105	120	110	130	145	150	165	1.91	0.963673	0	0.00175	0.000505	0.00277		0.0003	0.005325	0.005325	0.005325		Mexico	8.79358e-07	9.10942e-07	9.17197e-07	1.00917e-06	1.12861e-06	1.18622e-06	1.6972e-06	1.80594e-06	1.99836e-06	2.21866e-06	1.96583e-06	2.17384e-06	2.10611e-06	2.34084e-06	2.76993e-06		Mexico	8.79358e-07	9.10942e-07	9.17197e-07	1.00917e-06
Micronesia, Federated States of	0	0	0	0	0	0	0	0	0	0	0	0	0	0	0	2.748	1.38648	0.0199	0.00075				0.0003	0.00105	0.00105	0.02095		Micronesia, Federated States of	0	0	0	0	0	0	0	0	0	0	0	0	0	0	0		Micronesia, Federated States of	0	0	0	0
Moldova, Republic of	97	100	97	88	94	100	100	125	150	185	190	230	275	310	285	1.731	0.87336	0	0.001				0.0003	0.0013	0.0013	0.0013		Moldova, Republic of	3.65331e-07	3.70649e-07	3.50321e-07	3.33546e-07	3.27844e-07	3.53162e-07	5.17925e-07	5.80113e-07	6.96948e-07	8.35034e-07	8.28954e-07	9.38937e-07	9.75146e-07	1.18104e-06	1.16803e-06		Moldova, Republic of	3.65331e-07	3.70649e-07	3.50321e-07	3.33546e-07
Monaco	0	0	0	0	0	0	0	0	0	0	0	0	0	0	0	2.11	1.06458	0	0.001				0.0003	0.0013	0.0013	0.0013		Monaco	0	0	0	0	0	0	0	0	0	0	0	0	0	0	0		Monaco	0	0	0	0
Mongolia	68	62	58	62	55	69	75	85	85	90	85	60	70	75	75	2.7	1.36226	0	0.00075				0.0003	0.00105	0.00105	0.00105		Mongolia	2.06857e-07	1.8561e-07	1.69188e-07	1.89806e-07	1.54934e-07	1.9682e-07	3.13743e-07	3.18616e-07	3.18988e-07	3.28111e-07	2.99531e-07	1.97836e-07	2.00485e-07	2.30787e-07	2.48265e-07		Mongolia	2.06857e-07	1.8561e-07	1.69188e-07	1.89806e-07
Montenegro (from June 3, 2006)	5	12	18	15	15	21	0	0	0	0	10	10	10	10	10	1.74	0.877901	0.0198911	0.0025				0.0003	0.0028	0.0028	0.0226911		Montenegro (from June 3, 2006)	4.05601e-08	9.57986e-08	1.40017e-07	1.22456e-07	1.12679e-07	1.59738e-07	0	0	0	0	9.39705e-08	8.79272e-08	7.63751e-08	8.20576e-08	8.82719e-08		Montenegro (from June 3, 2006)	3.28698e-07	7.76348e-07	1.1347e-06	9.92376e-07
Mozambique	4	4	5	5	5	4	0	0	0	0	5	0	0	0	0	4.763	2.40313	0.359659	0.026		0.028		0.0003	0.0543	0.0543	0.413959		Mozambique	6.29261e-07	6.19269e-07	7.54261e-07	7.91589e-07	7.28392e-07	5.90053e-07	0	0	0	0	9.11179e-07	0	0	0	0		Mozambique	4.79721e-06	4.72103e-06	5.75015e-06	6.03472e-06
Myanmar	1	1	1	1	1	2	0	0	0	0	0	5	10	10	15	2.115	1.0671	0.368154	0.0224217	0	0	0.24896	0.0003	0.271681	0.273608	0.639835		Myanmar	7.92684e-07	7.80097e-07	7.60117e-07	7.97735e-07	7.34048e-07	1.48659e-06	0	0	0	0	0	4.296e-06	7.46316e-06	8.01844e-06	1.29385e-05		Myanmar	1.8537e-06	1.82426e-06	1.77754e-06	1.86551e-06
Namibia	2	10	11	3	3	3	0	0	0	0	0	5	5	10	10	3.212	1.62059	0.125451	0.00075		0.02		0.0003	0.02105	0.02105	0.146501		Namibia	1.2197e-07	6.00167e-07	6.43275e-07	1.84121e-07	1.69422e-07	1.71555e-07	0	0	0	0	0	3.30512e-07	2.87089e-07	6.16897e-07	6.63616e-07		Namibia	8.48873e-07	4.17697e-06	4.47699e-06	1.28142e-06
Nauru	0	0	0	0	0	0	0	0	0	0	0	0	0	0	0	3.331	1.68063	0.0199	0.00075				0.0003	0.00105	0.00105	0.02095		Nauru	0	0	0	0	0	0	0	0	0	0	0	0	0	0	0		Nauru	0	0	0	0
Nepal	6	9	14	15	10	10	0	10	35	30	30	30	40	60	55	1.984	1.00101	0.95976	0.01			0.03	0.0003	0.0403	0.0403	1.00006		Nepal	7.00531e-07	1.03411e-06	1.56742e-06	1.76249e-06	1.08119e-06	1.0948e-06	0	1.43868e-06	5.04125e-06	4.19774e-06	4.05751e-06	3.79657e-06	4.39702e-06	7.08626e-06	6.98767e-06		Nepal	1.73839e-05	2.56619e-05	3.88961e-05	4.37368e-05
New Zealand	3	6	12	9	10	14	0	0	0	0	0	0	0	0	0	1.56	0.787084	0.0295468	0.00293314	6.0606e-05	0.000801643	0.00226583	0.0003	0.00636123	0.00840607	0.035908		New Zealand	7.3061e-08	1.43802e-07	2.80237e-07	2.2058e-07	2.25522e-07	3.19707e-07	0	0	0	0	0	0	0	0	0		New Zealand	3.12093e-07	6.14275e-07	1.19708e-06	9.42245e-07
Nicaragua	2	4	4	5	5	6	0	0	0	0	0	5	0	0	0	2.218	1.11907	0.0215783	0.0012	0.0024	0.0096		0.0003	0.0135	0.0135	0.0350783		Nicaragua	7.82231e-08	1.53962e-07	1.50019e-07	1.96804e-07	1.81092e-07	2.20047e-07	0	0	0	0	0	2.11967e-07	0	0	0		Nicaragua	2.03254e-07	4.00054e-07	3.89808e-07	5.11374e-07
Netherlands	164	169	158	179	188	192	190	190	200	220	220	235	235	260	240	1.43	0.721493	0.0487157	0.0041392	0.000931847	0.00462822	0.00071827	0.0003	0.0107175	0.0107865	0.0594332		Netherlands	5.12504e-06	5.19743e-06	4.73468e-06	5.62944e-06	5.44046e-06	5.62619e-06	8.16506e-06	7.31636e-06	7.71041e-06	8.23936e-06	7.96413e-06	7.96004e-06	6.91423e-06	8.21895e-06	8.16127e-06		Netherlands	2.82387e-05	2.86375e-05	2.60878e-05	3.10179e-05
Niger	2	2	1	1	1	1	0	0	0	0	0	0	0	0	0	6.061	3.05802	0.403328	0.022	0.06	0.201		0.0003	0.2833	0.2833	0.686628		Niger	1.64153e-06	1.61546e-06	7.87042e-07	8.25993e-07	7.6005e-07	7.69622e-07	0	0	0	0	0	0	0	0	0		Niger	3.97853e-06	3.91535e-06	1.90754e-06	2.00194e-06
Nigeria	37	39	50	60	67	66	80	100	150	190	190	210	240	290	325	4.482	2.26135	0.501203	0.005	0.045	0.244		0.0003	0.2943	0.2943	0.795503		Nigeria	3.15474e-05	3.27246e-05	4.08801e-05	5.14839e-05	5.29006e-05	5.27674e-05	9.38003e-05	0.000105063	0.000157778	0.000194148	0.000187663	0.000194077	0.000192662	0.00025012	0.000301535		Nigeria	8.52736e-05	8.84558e-05	0.0001105	0.000139163
North Macedonia	63	63	75	97	112	174	175	210	265	320	350	380	470	555	590	1.5	0.756811	0.120104	0.02				0.0003	0.0203	0.0203	0.140404		North Macedonia	3.70517e-06	3.64633e-06	4.22969e-06	5.74113e-06	6.09972e-06	9.5957e-06	1.41533e-05	1.52186e-05	1.92268e-05	2.25546e-05	2.3845e-05	2.42239e-05	2.60248e-05	3.30179e-05	3.77583e-05		North Macedonia	2.56265e-05	2.52196e-05	2.92544e-05	3.97082e-05
Norway	18	18	18	25	22	20	0	0	0	10	10	0	0	0	10	1.4	0.706357		0.00214691	8.30108e-05	0.000800059	0.000814528	0.0003	0.00414451	0.00439937	0.00414451		Norway	2.29422e-07	2.25779e-07	2.19996e-07	3.20672e-07	2.59662e-07	2.3903e-07	0	0	0	1.52749e-07	1.47647e-07	0	0	0	1.38693e-07		Norway	2.16131e-07	2.12699e-07	2.07251e-07	3.02095e-07
Oman	0	0	0	6	2	1	0	0	0	0	0	0	0	0	0	2.525	1.27397	0.887369	0.0329798	0	0.0798317	0	0.0003	0.113111	0.113111	1.00048		Oman	0	0	0	1.97874e-06	6.06921e-07	3.07283e-07	0	0	0	0	0	0	0	0	0		Oman	0	0	0	1.75021e-05
Austria	250	259	254	269	268	296	320	280	305	330	340	380	385	395	395	1.32	0.665994	0.00286129	0.00173354	4.39805e-05	0.000452966	1.18058e-05	0.0003	0.00254229	0.00260329	0.00540357		Austria	1.88553e-06	1.92239e-06	1.837e-06	2.04176e-06	1.87177e-06	2.09337e-06	3.31892e-06	2.6022e-06	2.83784e-06	2.98281e-06	2.97054e-06	3.1065e-06	2.73387e-06	3.01357e-06	3.24179e-06		Austria	3.91374e-06	3.99025e-06	3.813e-06	4.23802e-06
Pakistan	30	31	40	44	51	72	70	115	155	185	195	230	265	350	475	3.605	1.81887	0.151539	0.0455839	0	0.0018	0.0018	0.0003	0.0494839	0.0494839	0.201023		Pakistan	4.30087e-06	4.37367e-06	5.4989e-06	6.34814e-06	6.77064e-06	9.67894e-06	1.38002e-05	2.03152e-05	2.74133e-05	3.17852e-05	3.23842e-05	3.57402e-05	3.57688e-05	5.07567e-05	7.41007e-05		Pakistan	1.74718e-05	1.77675e-05	2.23387e-05	2.57886e-05
Palestinian Territories	0	0	0	0	0	4	0	0	0	0	0	0	0	0	0	3.311	1.67053	0.0294426	0.03		0.005		0.0003	0.0353	0.0353	0.0647426		Palestinian Territories	0	0	0	0	0	3.83589e-07	0	0	0	0	0	0	0	0	0		Palestinian Territories	0	0	0	0
Palau	0	0	0	0	0	0	0	0	0	0	0	0	0	0	0	1.907	0.962159	0.0199	0.00075				0.0003	0.00105	0.00105	0.02095		Palau	0	0	0	0	0	0	0	0	0	0	0	0	0	0	0		Palau	0	0	0	0
Panama	0	0	0	1	0	0	0	0	0	0	0	0	0	0	0	2.119	1.06912	0.0502036	0.0015	0.003	0.0225		0.0003	0.0273	0.0273	0.0775036		Panama	0	0	0	7.95962e-08	0	0	0	0	0	0	0	0	0	0	0		Panama	0	0	0	2.2597e-07
Papua New Guinea	0	0	0	0	0	0	0	0	0	0	0	0	0	0	0	3.099	1.56357	0.9639	0.035				0.0003	0.0353	0.0353	0.9992		Papua New Guinea	0	0	0	0	0	0	0	0	0	0	0	0	0	0	0		Papua New Guinea	0	0	0	0
Paraguay	7	8	8	9	8	9	0	0	0	0	0	0	0	5	5	2.422	1.222	0.021879	0.00075				0.0003	0.00105	0.00105	0.022929		Paraguay	2.12941e-08	2.39496e-08	2.33362e-08	2.75525e-08	2.25359e-08	2.56722e-08	0	0	0	0	0	0	0	1.53858e-08	1.6551e-08		Paraguay	4.65001e-07	5.22992e-07	5.09597e-07	6.01669e-07
Peru	38	41	52	51	56	64	45	70	65	70	65	90	90	100	90	1.98	0.998991	0.0198733	0.00075		0.01		0.0003	0.01105	0.01105	0.0309233		Peru	1.21651e-06	1.29171e-06	1.59631e-06	1.64309e-06	1.66014e-06	1.9212e-06	1.98106e-06	2.76134e-06	2.56709e-06	2.68565e-06	2.41051e-06	3.12299e-06	2.71268e-06	3.23834e-06	3.13523e-06		Peru	3.4044e-06	3.61484e-06	4.46725e-06	4.59817e-06
Philippines	62	57	65	80	98	115	135	165	215	345	425	500	550	610	675	1.916	0.9667	0.215104	0.01			0.01	0.0003	0.0203	0.039488	0.235404		Philippines	7.09297e-06	6.41741e-06	7.13067e-06	9.21053e-06	1.03821e-05	1.23366e-05	2.12384e-05	2.32599e-05	3.03437e-05	4.73013e-05	5.63233e-05	6.20012e-05	5.92409e-05	7.0592e-05	8.40298e-05		Philippines	4.22841e-05	3.82568e-05	4.25088e-05	5.49077e-05
Poland	2959	3212	3566	4156	4539	4962	5430	5585	6380	6825	7350	7820	8525	8930	8935	1.158	0.584258	0	0.001				0.0003	0.0013	0.0013	0.0013		Poland	1.11445e-05	1.19053e-05	1.28788e-05	1.57525e-05	1.58307e-05	1.75239e-05	2.81233e-05	2.59195e-05	2.96435e-05	3.0806e-05	3.20674e-05	3.19239e-05	3.02295e-05	3.40217e-05	3.66187e-05		Poland	1.11445e-05	1.19053e-05	1.28788e-05	1.57525e-05
Portugal	36	44	53	53	55	67	80	100	100	105	110	125	155	175	195	1.44	0.726539	0.00872703	0.0141976	6.77491e-05	0.00782135	2.43705e-05	0.000288389	0.0223994	0.0224303	0.0311265		Portugal	2.33942e-06	2.81389e-06	3.30264e-06	3.46609e-06	3.30973e-06	4.08263e-06	7.14905e-06	8.00745e-06	8.01678e-06	8.17735e-06	8.28058e-06	8.8046e-06	9.48331e-06	1.15036e-05	1.3789e-05		Portugal	3.24641e-06	3.90483e-06	4.58308e-06	4.80989e-06
Rwanda	1	1	1	2	2	1	0	0	5	5	5	5	5	0	5	3.698	1.86579	0.4071	0.00075		0.04		0.0003	0.04105	0.04105	0.44815		Rwanda	1.18928e-07	1.1704e-07	1.14042e-07	2.39372e-07	2.20262e-07	1.11518e-07	0	0	7.33582e-07	7.12643e-07	6.88838e-07	6.44538e-07	5.59857e-07	0	6.47065e-07		Rwanda	1.29836e-06	1.27774e-06	1.24502e-06	2.61326e-06
Romania	287	283	386	500	626	817	1155	1405	1625	1860	1960	2090	2295	2400	2425	1.71	0.862765	0.097405	0.01				0.0003	0.0103	0.0103	0.107705		Romania	8.56427e-06	8.31081e-06	1.10453e-05	1.50154e-05	1.72984e-05	2.28607e-05	4.73961e-05	5.16622e-05	5.98213e-05	6.6518e-05	6.77528e-05	6.76003e-05	6.44783e-05	7.24451e-05	7.87433e-05		Romania	8.95548e-05	8.69044e-05	0.000115498	0.000157013
Russian Federation	1749	1743	1829	2111	2240	2621	3090	3145	3160	3290	3365	3445	3690	3890	3810	1.41	0.711403	0	0.001				0.0003	0.0013	0.0013	0.0013		Russian Federation	6.58725e-06	6.46042e-06	6.60554e-06	8.00131e-06	7.81244e-06	9.25639e-06	1.60039e-05	1.45957e-05	1.46824e-05	1.48501e-05	1.46812e-05	1.40636e-05	1.30847e-05	1.48202e-05	1.56147e-05		Russian Federation	6.58725e-06	6.46042e-06	6.60554e-06	8.00131e-06
Solomon Islands	0	0	0	0	0	0	0	0	0	0	0	0	0	0	0	3.557	1.79465	0.351975	0.00075				0.0003	0.00105	0.00105	0.353025		Solomon Islands	0	0	0	0	0	0	0	0	0	0	0	0	0	0	0		Solomon Islands	0	0	0	0
Zambia	0	0	1	1	3	1	0	0	0	0	0	0	0	0	0	4.101	2.06912	0.406157	0.0015	0.006	0.176		0.0003	0.1838	0.1838	0.589957		Zambia	0	0	5.10619e-07	5.35889e-07	1.47932e-06	4.99317e-07	0	0	0	0	0	0	0	0	0		Zambia	0	0	1.63897e-06	1.72009e-06
Samoa	0	0	0	0	0	0	0	0	0	0	0	0	0	0	0	3.829	1.93189	0.1664	0.00075				0.0003	0.00105	0.00105	0.16745		Samoa	0	0	0	0	0	0	0	0	0	0	0	0	0	0	0		Samoa	0	0	0	0
San Marino	0	0	0	0	0	0	0	0	0	0	0	0	0	0	0	1.149	0.579717	0	0.001				0.0003	0.0013	0.0013	0.0013		San Marino	0	0	0	0	0	0	0	0	0	0	0	0	0	0	0		San Marino	0	0	0	0
Sao Tome and Principe	0	0	0	0	0	0	0	0	0	0	0	0	0	0	0	3.644	1.83855	0.6864	0.00075	0.021	0.18		0.0003	0.20205	0.20205	0.88845		Sao Tome and Principe	0	0	0	0	0	0	0	0	0	0	0	0	0	0	0		Sao Tome and Principe	0	0	0	0
Saudi Arabia	3	3	1	2	3	12	0	0	0	0	0	0	0	0	5	2.28	1.15035	0.460611	0.067445	0	0.0986605	0	0.0003	0.166406	0.166406	0.627016		Saudi Arabia	1.44631e-06	1.42334e-06	4.62295e-07	9.70348e-07	1.33932e-06	5.42476e-06	0	0	0	0	0	0	0	0	2.62302e-06		Saudi Arabia	5.44968e-06	5.36315e-06	1.74193e-06	3.65627e-06
Sweden	34	33	31	31	35	37	30	15	10	10	10	20	40	55	80	1.45	0.731584		0.00282157	0.00010914	0.00119547	0.000817622	0.0003	0.00524381	0.00554404	0.00524381		Sweden	5.46105e-07	5.21626e-07	4.77463e-07	5.01092e-07	5.20583e-07	5.57261e-07	6.6263e-07	2.96877e-07	1.98149e-07	1.92493e-07	1.86063e-07	3.48194e-07	6.04895e-07	8.93613e-07	1.39824e-06		Sweden	5.16531e-07	4.93379e-07	4.51606e-07	4.73956e-07
Switzerland	111	110	105	114	110	118	105	130	130	125	130	100	105	120	120	1.33	0.671039	0.0260508	0.00372122	0.000178243	0.00133222	0.000777803	0.0003	0.00630949	0.00662596	0.0323603		Switzerland	2.1308e-06	2.07807e-06	1.93281e-06	2.20233e-06	1.95541e-06	2.12404e-06	2.7718e-06	3.07505e-06	3.07863e-06	2.87573e-06	2.89085e-06	2.08072e-06	1.89772e-06	2.33019e-06	2.50665e-06		Switzerland	1.04066e-05	1.0149e-05	9.4396e-06	1.07559e-05
Senegal	2	2	2	3	3	4	0	0	0	0	0	0	0	5	10	3.818	1.92634	0.206852	0.004	0.017	0.127		0.0003	0.1483	0.1483	0.355152		Senegal	8.59295e-07	8.4565e-07	8.23991e-07	1.29716e-06	1.1936e-06	1.61151e-06	0	0	0	0	0	0	0	2.17306e-06	4.67526e-06		Senegal	2.05786e-06	2.02518e-06	1.97331e-06	3.10646e-06
Serbia	83	170	177	214	362	406	340	340	350	430	460	440	460	510	525	1.61	0.812311	0.0198911	0.0025				0.0003	0.0028	0.0028	0.0226911		Serbia	6.73298e-07	1.35715e-06	1.37684e-06	1.74703e-06	2.71933e-06	3.08827e-06	3.79281e-06	3.39857e-06	3.50261e-06	4.18038e-06	4.32264e-06	3.8688e-06	3.51325e-06	4.18494e-06	4.63427e-06		Serbia	5.45638e-06	1.09983e-05	1.11578e-05	1.41579e-05
Serbia (including Kosovo) (June 3, 2006-February 16, 2008)	30	13	11	14	12	10	5	5	5	5	5	0	0	0	0	1.61	0.812311	0.0198911	0.0025				0.0003	0.0028	0.0028	0.0226911		Serbia (including Kosovo) (June 3, 2006-February 16, 2008)	2.43361e-07	1.03782e-07	8.55662e-08	1.14292e-07	9.01436e-08	7.60658e-08	5.57766e-08	4.9979e-08	5.00373e-08	4.8609e-08	4.69853e-08	0	0	0	0		Serbia (including Kosovo) (June 3, 2006-February 16, 2008)	1.97219e-06	8.41043e-07	6.93425e-07	9.26218e-07
Serbia and Montenegro (February 5, 2003-June 2, 2006)	50	18	19	15	12	12	0	0	0	0	0	0	0	0	0	1.61	0.812311	0.0198911	0.0025				0.0003	0.0028	0.0028	0.0226911		Serbia and Montenegro (February 5, 2003-June 2, 2006)	4.05601e-07	1.43698e-07	1.47796e-07	1.22456e-07	9.01436e-08	9.12789e-08	0	0	0	0	0	0	0	0	0		Serbia and Montenegro (February 5, 2003-June 2, 2006)	3.28698e-06	1.16452e-06	1.19773e-06	9.92376e-07
Seychelles	0	0	0	0	0	0	0	0	0	0	0	0	0	0	0	2.02	1.01917	0.19	0.00075		0.006		0.0003	0.00705	0.00705	0.19705		Seychelles	0	0	0	0	0	0	0	0	0	0	0	0	0	0	0		Seychelles	0	0	0	0
Sierra Leone	1	2	2	2	1	2	0	0	0	0	0	0	0	0	0	3.791	1.91271	0.406157	0.00075	0.028	0.225		0.0003	0.25405	0.25405	0.660207		Sierra Leone	7.36021e-07	1.44867e-06	1.41156e-06	1.48142e-06	6.81577e-07	1.38032e-06	0	0	0	0	0	0	0	0	0		Sierra Leone	1.91272e-06	3.76469e-06	3.66827e-06	3.84981e-06
Zimbabwe	1	2	2	4	5	4	0	0	5	0	10	10	15	10	10	3.724	1.87891	0.351975	0.0015	0	0.014		0.0003	0.0158	0.0158	0.367775		Zimbabwe	4.5775e-08	9.00963e-08	8.77887e-08	1.84267e-07	2.11945e-07	1.71691e-07	0	0	2.82353e-07	0	5.30262e-07	4.96161e-07	6.46461e-07	4.63039e-07	4.98106e-07		Zimbabwe	1.0655e-06	2.09716e-06	2.04345e-06	4.28916e-06
Singapore	7	6	7	9	8	7	0	0	0	0	0	0	0	0	0	0.97	0.489405	0.160334	0.03				0.0003	0.0303	0.063179	0.190634		Singapore	1.28127e-06	1.0808e-06	1.22863e-06	1.65785e-06	1.356e-06	1.20144e-06	0	0	0	0	0	0	0	0	0		Singapore	3.86607e-06	3.26115e-06	3.70723e-06	5.00233e-06
Slovakia	151	137	141	168	185	191	215	220	230	260	280	280	300	310	325	1.49	0.751766	0	0.001				0.0003	0.0013	0.0013	0.0013		Slovakia	5.68711e-07	5.07789e-07	5.0923e-07	6.3677e-07	6.45224e-07	6.7454e-07	1.11354e-06	1.021e-06	1.06865e-06	1.17356e-06	1.22162e-06	1.14305e-06	1.0638e-06	1.18104e-06	1.33196e-06		Slovakia	5.68711e-07	5.07789e-07	5.0923e-07	6.3677e-07
Slovenia	24	22	18	22	24	27	5	10	20	25	30	25	30	40	40	1.51	0.761857	0	0.001				0.0003	0.0013	0.0013	0.0013		Slovenia	9.03911e-08	8.15428e-08	6.50081e-08	8.33865e-08	8.37048e-08	9.53539e-08	2.58963e-08	4.64091e-08	9.29263e-08	1.12842e-07	1.30888e-07	1.02058e-07	1.0638e-07	1.52393e-07	1.63934e-07		Slovenia	9.03911e-08	8.15428e-08	6.50081e-08	8.33865e-08
Somalia	5	11	20	69	116	160	200	225	230	245	245	255	275	310	330	6.132	3.09384	0.0198931	0.005		0.001		0.0003	0.0063	0.0063	0.0261931		Somalia	9.12603e-08	1.97585e-07	3.50044e-07	1.26742e-06	1.96062e-06	2.73837e-06	5.01989e-06	5.06037e-06	5.17886e-06	5.35915e-06	5.18013e-06	5.04482e-06	4.72571e-06	5.72352e-06	6.55419e-06		Somalia	3.79426e-07	8.21483e-07	1.45535e-06	5.26945e-06
Soviet Union (until 25.12.1991)	36	27	24	27	22	18	5	5	5	5	10	10	5	5	0	n.a.												Soviet Union (until 25.12.1991)																	Soviet Union (until 25.12.1991)
Spain	135	149	203	283	315	324	375	345	370	365	365	405	455	485	490	1.12	0.565086	0.00723017	0.00262202	0.000374818	0.00108027	2.03522e-05	0.000290737	0.0043882	0.00445605	0.0116184		Spain	1.74283e-06	1.89302e-06	2.51303e-06	3.67676e-06	3.76579e-06	3.92216e-06	6.6574e-06	5.48818e-06	5.89273e-06	5.64718e-06	5.45854e-06	5.66722e-06	5.53038e-06	6.33362e-06	6.88351e-06		Spain	4.54412e-06	4.93572e-06	6.55228e-06	9.58652e-06
Sri Lanka	18	21	21	20	23	21	10	0	5	10	20	25	30	45	55	1.974	0.995964	0.494006	0.025			0.025	0.0003	0.0503	0.0503	0.544306		Sri Lanka	2.62308e-06	3.01167e-06	2.93453e-06	2.93311e-06	3.10378e-06	2.86958e-06	2.00397e-06	0	8.98884e-07	1.74645e-06	3.37623e-06	3.94887e-06	4.11607e-06	6.63348e-06	8.72158e-06		Sri Lanka	2.83848e-05	3.25898e-05	3.17551e-05	3.17397e-05
St. Kitts and Nevis	0	0	0	0	0	0	0	0	0	0	0	0	0	0	0	1.505	0.759334	0.23315	0.01	0.04	0.11		0.0003	0.1603	0.1603	0.39345		St. Kitts and Nevis	0	0	0	0	0	0	0	0	0	0	0	0	0	0	0		St. Kitts and Nevis	0	0	0	0
St. Lucia	0	0	0	0	0	0	0	0	0	0	0	0	0	0	0	1.379	0.695762	0.213231	0.01	0.03	0.1		0.0003	0.1403	0.1403	0.353531		St. Lucia	0	0	0	0	0	0	0	0	0	0	0	0	0	0	0		St. Lucia	0	0	0	0
St. Vincent and the Grenadines	0	0	0	0	0	0	0	0	0	0	0	0	0	0	0	1.775	0.89556	0.147776	0.03	0.03	0.068		0.0003	0.1283	0.1283	0.276076		St. Vincent and the Grenadines	0	0	0	0	0	0	0	0	0	0	0	0	0	0	0		St. Vincent and the Grenadines	0	0	0	0
Stateless	70	57	75	60	71	91	115	145	160	170	155	195	185	215	225	n.a.												Stateless																	Stateless
South Africa	23	20	18	21	21	29	10	20	35	40	30	40	50	85	115	2.216	1.11806	0.125484	0.0015	0.001	0.003		0.0003	0.0058	0.0058	0.131284		South Africa	3.8648e-07	3.30733e-07	2.90036e-07	3.55122e-07	3.26771e-07	4.56938e-07	2.31074e-07	4.14112e-07	7.2554e-07	8.05521e-07	5.8396e-07	7.2854e-07	7.91028e-07	1.4448e-06	2.10276e-06		South Africa	8.74802e-06	7.48619e-06	6.565e-06	8.03822e-06
Sudan (including South Sudan) (until July 8, 2011)	4	3	2	2	2	2	0	0	0	0	0	0	0	0	0	4.323	2.18113	0.344047	0.039	0.001	0.021		0.0003	0.0613	0.0613	0.405347		Sudan (including South Sudan) (until July 8, 2011)	7.10381e-07	5.24326e-07	3.40598e-07	3.57454e-07	3.28917e-07	3.33059e-07	0	0	0	0	0	0	0	0	0		Sudan (including South Sudan) (until July 8, 2011)	4.69741e-06	3.46711e-06	2.25221e-06	2.36367e-06
Sudan (excluding South Sudan) (from July 9, 2011)	0	2	1	2	3	4	0	0	5	20	20	20	30	75	135	4.323	2.18113	0.344047	0.039	0.001	0.021		0.0003	0.0613	0.0613	0.405347		Sudan (excluding South Sudan) (from July 9, 2011)	0	3.49551e-07	1.70299e-07	3.57454e-07	4.93375e-07	6.66119e-07	0	0	1.09546e-06	4.25676e-06	4.11457e-06	3.84996e-06	5.01621e-06	1.34736e-05	2.60891e-05		Sudan (excluding South Sudan) (from July 9, 2011)	0	2.31141e-06	1.1261e-06	2.36367e-06
South Sudan (from July 9, 2011)	0	0	0	0	0	0	0	0	0	0	0	5	0	0	20	3.864	1.94955	0.344047	0.039	0.001	0.021		0.0003	0.0613	0.0613	0.405347		South Sudan (from July 9, 2011)	0	0	0	0	0	0	0	0	0	0	0	9.62489e-07	0	0	3.86505e-06		South Sudan (from July 9, 2011)	0	0	0	0
Suriname	0	0	0	0	0	0	0	0	0	0	0	0	0	0	0	2.249	1.13471	0.151776	0.01	0.015	0.07		0.0003	0.0953	0.0953	0.247076		Suriname	0	0	0	0	0	0	0	0	0	0	0	0	0	0	0		Suriname	0	0	0	0
Syria	22	50	80	127	315	1493	2835	3400	3585	3600	3560	3700	4065	4335	4320	2.712	1.36831	0.0294426	0.05		0.01		0.0003	0.0603	0.0603	0.0897426		Syria	3.84336e-06	8.59621e-06	1.34017e-05	2.2328e-05	5.09593e-05	0.000244573	0.000681074	0.000731907	0.000772631	0.000753718	0.000720445	0.000700623	0.000668608	0.000766068	0.000821231		Syria	5.71995e-06	1.27935e-05	1.99453e-05	3.32301e-05
Tajikistan	6	6	7	6	2	5	0	5	0	5	5	30	40	45	50	3.072	1.54995	0.133277	0.05				0.0003	0.0503	0.0503	0.183577		Tajikistan	8.7436e-07	8.60476e-07	9.78177e-07	8.79932e-07	2.69894e-07	6.83234e-07	0	8.97837e-07	0	8.73227e-07	8.44057e-07	4.73865e-06	5.4881e-06	6.63348e-06	7.92871e-06		Tajikistan	3.19111e-06	3.14043e-06	3.57e-06	3.21144e-06
Taiwan	16	19	18	25	38	45	35	40	55	45	35	60	55	65	45	0.999	0.504036	0.092191	0.02				0.0003	0.0203	0.058676	0.112491		Taiwan	2.71989e-06	3.17858e-06	2.93417e-06	4.27691e-06	5.98191e-06	7.17306e-06	8.18187e-06	8.37877e-06	1.15342e-05	9.16773e-06	6.89227e-06	1.10555e-05	8.80272e-06	1.11772e-05	8.3241e-06		Taiwan	5.21445e-06	6.09384e-06	5.62525e-06	8.1995e-06
Tanzania	3	3	4	6	6	11	5	5	5	0	0	0	0	0	5	4.606	2.32392	0.382019	0.0015	0	0.23		0.0003	0.2318	0.2318	0.613819		Tanzania	2.01468e-06	1.98269e-06	2.57588e-06	4.05503e-06	3.7313e-06	6.92687e-06	4.6175e-06	4.13755e-06	4.14237e-06	0	0	0	0	0	3.65383e-06		Tanzania	5.33498e-06	5.25027e-06	6.82106e-06	1.07379e-05
Thailand	411	423	415	431	437	454	480	475	480	510	525	520	545	550	535	1.212	0.611504	0.655449	0.0495517	0	0	0.208501	0.0003	0.258352	0.283891	0.913802		Thailand	0.000338037	0.000342383	0.000327304	0.000356746	0.000332835	0.000350138	0.000542896	0.000481399	0.000487033	0.000502702	0.000500201	0.000463575	0.000422029	0.000457588	0.000478817		Thailand	0.00108809	0.00110208	0.00105354	0.00114831
Timor-Leste	0	0	0	0	0	0	0	0	0	0	0	0	0	0	0	2.707	1.36579	0.242026	0.03			0.04	0.0003	0.0703	0.0703	0.312326		Timor-Leste	0	0	0	0	0	0	0	0	0	0	0	0	0	0	0		Timor-Leste	0	0	0	0
Togo	12	10	7	6	6	7	0	0	0	0	0	0	0	0	0	4.192	2.11504	0.4071	0.005	0.094	0.186		0.0003	0.2853	0.2853	0.6924		Togo	9.91869e-06	8.13432e-06	5.54819e-06	4.99094e-06	4.59249e-06	5.42539e-06	0	0	0	0	0	0	0	0	0		Togo	2.40718e-05	1.97413e-05	1.3465e-05	1.21126e-05
Tonga	0	0	0	0	0	0	0	0	0	0	0	0	0	0	0	3.129	1.57871	0.1664	0.00075				0.0003	0.00105	0.00105	0.16745		Tonga	0	0	0	0	0	0	0	0	0	0	0	0	0	0	0		Tonga	0	0	0	0
Trinidad and Tobago	1	1	1	1	2	3	0	0	0	0	0	0	0	0	0	1.532	0.772957	0.172628	0.01	0.02	0.08		0.0003	0.1103	0.1103	0.282928		Trinidad and Tobago	3.19556e-07	3.14482e-07	3.06427e-07	3.21592e-07	5.91836e-07	8.98934e-07	0	0	0	0	0	0	0	0	0		Trinidad and Tobago	8.19685e-07	8.06669e-07	7.86008e-07	8.24908e-07
Chad	2	2	6	20	23	26	15	10	15	15	15	25	30	40	40	6.12	3.08779	0.405214	0.009	0.003	0.09		0.0003	0.1023	0.1023	0.507514		Chad	5.92757e-07	5.83345e-07	1.70521e-06	5.96534e-06	6.31247e-06	7.2257e-06	6.11351e-06	3.65204e-06	5.48444e-06	5.3279e-06	5.14992e-06	8.03121e-06	8.37126e-06	1.19921e-05	1.29003e-05		Chad	2.94069e-06	2.89399e-06	8.45962e-06	2.95943e-05
Czechia	178	190	199	232	249	268	280	270	300	315	320	330	305	305	300	1.45	0.731584	0	0.001				0.0003	0.0013	0.0013	0.0013		Czechia	6.70401e-07	7.04233e-07	7.18701e-07	8.79349e-07	8.68437e-07	9.46475e-07	1.45019e-06	1.25304e-06	1.3939e-06	1.42181e-06	1.39613e-06	1.34717e-06	1.08153e-06	1.16199e-06	1.2295e-06		Czechia	6.70401e-07	7.04233e-07	7.18701e-07	8.79349e-07
Czechoslovakia (until December 31, 1992)	17	16	15	10	11	9	0	0	0	0	0	0	0	0	0	n.a.												Czechoslovakia (until December 31, 1992)																	Czechoslovakia (until December 31, 1992)
Tunisia	10	11	10	11	12	23	20	35	35	60	65	95	125	140	165	1.832	0.924319	0.345434	0.0214199	0.00235335	0.0211801	0	0.0003	0.0452533	0.0452533	0.390687		Tunisia	1.31106e-06	1.41926e-06	1.25719e-06	1.45135e-06	1.45689e-06	2.82755e-06	3.60582e-06	5.65429e-06	5.66088e-06	9.42738e-06	9.87183e-06	1.35002e-05	1.54296e-05	1.85669e-05	2.35396e-05		Tunisia	1.13188e-05	1.2253e-05	1.08538e-05	1.253e-05
Turkey	489	515	527	561	558	577	635	695	800	885	945	1090	1210	1555	1680	1.51	0.761857	0.0296332	0.016699	1.05535e-05	0.004403	0	0.0003	0.0214126	0.0214126	0.0510457		Turkey	3.03353e-05	3.14409e-05	3.13495e-05	3.50236e-05	3.20552e-05	3.35641e-05	5.41709e-05	5.31267e-05	6.12243e-05	6.57962e-05	6.79101e-05	7.32926e-05	7.06721e-05	9.75797e-05	0.000113408		Turkey	7.23168e-05	7.49525e-05	7.47346e-05	8.34934e-05
Turkmenistan	11	10	10	6	7	8	0	0	0	0	0	0	0	0	0	2.69	1.35721	0.13495	0.012				0.0003	0.0123	0.0123	0.14725		Turkmenistan	3.91985e-07	3.50691e-07	3.41709e-07	2.15172e-07	2.30993e-07	2.67317e-07	0	0	0	0	0	0	0	0	0		Turkmenistan	4.69267e-06	4.19832e-06	4.09079e-06	2.57595e-06
Tuvalu	0	0	0	0	0	0	0	0	0	0	0	0	0	0	0	3.208	1.61857	0.1664	0.00075				0.0003	0.00105	0.00105	0.16745		Tuvalu	0	0	0	0	0	0	0	0	0	0	0	0	0	0	0		Tuvalu	0	0	0	0
Uganda	7	4	5	7	8	10	0	0	0	0	0	5	15	25	35	4.283	2.16095	0.382204	0.00075		0.168		0.0003	0.16905	0.16905	0.551254		Uganda	3.42834e-06	1.92795e-06	2.34821e-06	3.45019e-06	3.62828e-06	4.59247e-06	0	0	0	0	0	2.6543e-06	6.91672e-06	1.23856e-05	1.8653e-05		Uganda	1.11795e-05	6.28683e-06	7.65726e-06	1.12507e-05
Ukraine	1654	1633	1612	1574	1592	1596	1615	1675	1740	1820	1865	2045	12910	12630	11700	0.977	0.492936	0	0.001				0.0003	0.0013	0.0013	0.0013		Ukraine	6.22945e-06	6.0527e-06	5.82184e-06	5.96592e-06	5.55242e-06	5.63647e-06	8.36449e-06	7.77352e-06	8.08459e-06	8.21493e-06	8.13684e-06	8.34837e-06	4.57787e-05	4.8118e-05	4.79506e-05		Ukraine	6.22945e-06	6.0527e-06	5.82184e-06	5.96592e-06
Hungary	146	185	211	266	316	346	390	415	460	465	485	515	515	550	585	1.51	0.761857	0	0.001				0.0003	0.0013	0.0013	0.0013		Hungary	5.49879e-07	6.85701e-07	7.62039e-07	1.00822e-06	1.10211e-06	1.22194e-06	2.01991e-06	1.92598e-06	2.13731e-06	2.09887e-06	2.11601e-06	2.1024e-06	1.82618e-06	2.0954e-06	2.39753e-06		Hungary	5.49879e-07	6.85701e-07	7.62039e-07	1.00822e-06
Unclear / No information provided	111	106	104	98	104	250	295	325	375	380	390	420	435	425	385	n.a.												Unclear / No information provided																	Unclear / No information provided
Uruguay	1	3	4	5	4	4	0	0	0	0	0	0	0	0	0	1.409	0.710898	0.0198812	0.01				0.0003	0.0103	0.0103	0.0301812		Uruguay	2.98407e-08	8.81005e-08	1.14459e-07	1.50154e-07	1.10533e-07	1.11925e-07	0	0	0	0	0	0	0	0	0		Uruguay	8.74395e-08	2.58153e-07	3.35388e-07	4.39983e-07
Uzbekistan	69	70	72	68	53	57	30	30	30	35	60	65	75	80	125	3.5	1.76589	0.135028	0.03				0.0003	0.0303	0.0303	0.165328		Uzbekistan	6.05707e-06	6.04728e-06	6.06075e-06	6.00733e-06	4.30838e-06	4.6919e-06	3.62149e-06	3.24507e-06	3.24885e-06	3.68213e-06	6.10137e-06	6.18474e-06	6.19866e-06	7.10384e-06	1.19404e-05		Uzbekistan	3.30497e-05	3.29963e-05	3.30698e-05	3.27783e-05
Vanuatu	0	0	0	0	0	0	0	0	0	0	0	0	0	0	0	3.596	1.81433	0.351975	0.00075				0.0003	0.00105	0.00105	0.353025		Vanuatu	0	0	0	0	0	0	0	0	0	0	0	0	0	0	0		Vanuatu	0	0	0	0
Vatican City	0	0	0	0	0	0	0	0	0	0	0	0	0	0	0	n.a.												Vatican City																	Vatican City
Venezuela, Bolivarian Republic of	18	20	23	24	28	28	10	0	10	15	15	35	45	60	50	2.079	1.04894	0.106173	0.00377107	0.00400629	0.0207201	0	0.0003	0.0287975	0.0287975	0.134971		Venezuela, Bolivarian Republic of	1.50175e-06	1.64212e-06	1.84007e-06	2.0151e-06	2.16326e-06	2.1905e-06	1.1473e-06	0	1.02925e-06	1.49981e-06	1.4497e-06	3.1651e-06	3.53477e-06	5.06368e-06	4.5393e-06		Venezuela, Bolivarian Republic of	7.03854e-06	7.69642e-06	8.62419e-06	9.44452e-06
United Arab Emirates	0	0	0	0	0	2	0	0	0	0	0	0	0	0	0	1.2	0.605449	0.495076	0.0171		0.0189		0.0003	0.0363	0.0363	0.531376		United Arab Emirates	0	0	0	0	0	1.97228e-07	0	0	0	0	0	0	0	0	0		United Arab Emirates	0	0	0	0
United States	210	214	222	241	253	262	275	300	330	310	320	340	375	405	380	1.6165	0.81559	0.0386324	0.00384663	0.00711948	0.00861795	0.00118313	0.0003	0.0210672	0.0218799	0.0596996		United States	1.33118e-05	1.33499e-05	1.34943e-05	1.53742e-05	1.48512e-05	1.55732e-05	2.39719e-05	2.34329e-05	2.58063e-05	2.35503e-05	2.34979e-05	2.33609e-05	2.23806e-05	2.59694e-05	2.62116e-05		United States	3.63214e-05	3.64255e-05	3.68194e-05	4.19487e-05
United Kingdom	212	212	211	227	211	217	230	185	195	170	200	190	190	195	175	1.56	0.787084	0.0195831	0.00451323	0.0013378	0.00457919	0.000575841	0.0017718	0.0127779	0.0134903	0.032361		United Kingdom	8.28566e-06	8.15409e-06	7.90777e-06	8.92844e-06	7.63657e-06	7.95264e-06	1.23615e-05	8.90946e-06	9.402e-06	7.96266e-06	9.0549e-06	8.04895e-06	6.99145e-06	7.70931e-06	7.44257e-06		United Kingdom	1.9876e-05	1.95604e-05	1.89695e-05	2.14179e-05
Vietnam	1404	1316	1253	1175	1139	1144	1125	1095	1090	1125	1070	1190	1260	1300	1355	1.913	0.965187	0.208254	0.0259562	0	0	0.090939	0.0003	0.117195	0.132723	0.325449		Vietnam	0.000539865	0.000497992	0.000462008	0.000454689	0.000405571	0.000412481	0.000594872	0.000518825	0.000517058	0.000518428	0.000476612	0.000495974	0.000456154	0.000505651	0.000566958		Vietnam	0.0013238	0.00122112	0.00113288	0.00111494
Central African Republic	0	0	0	0	0	2	0	0	0	0	0	0	0	0	0	6.012	3.0333	0.4071	0.001	0.001	0.151		0.0003	0.1533	0.1533	0.5604		Central African Republic	0	0	0	0	0	8.3292e-07	0	0	0	0	0	0	0	0	0		Central African Republic	0	0	0	0
Cyprus	1	2	2	4	4	4	0	0	0	0	0	0	0	0	0	1.389	0.700807	0.4148	0.15		0.01		0.0003	0.1603	0.167094	0.5751		Cyprus	4.84097e-07	9.52819e-07	9.28416e-07	1.94872e-06	1.79315e-06	1.81573e-06	0	0	0	0	0	0	0	0	0		Cyprus	1.66615e-06	3.27939e-06	3.1954e-06	6.70707e-06
Number of non-German women in childbearing age in Brandenburg	16590	17154	18249	19994	21741	25751	29160	31115	34170	36700	38175	41385	56025	59545	60535	1.982												Sum significant variants	0.00163047	0.00163261	0.00162434	0.00177372	0.00174951	0.00219273	0.00362456	0.00358128	0.00391252	0.00411626	0.0040557	0.00410676	0.00394705	0.00476513	0.00549333		Sum all variants	0.00512757	0.00518392	0.00522343	0.0057558
Number of all women in childbearing age in Brandenburg	544612	520414	505844	492858	482360	477272	470078	463976	459723	457216	456094	456535	460920	465358	469203
Share of non-German women in childbearing age	0.0304621	0.0329622	0.0360763	0.0405675	0.0450721	0.0539546	0.0620323	0.0670617	0.0743274	0.0802684	0.0836999	0.0906502	0.12155	0.127955	0.129017
Number of live births with non-German mother in Brandenburg	911	894	937	1070	1128	1337	2432	2259	2428	2463	2434	2473	2665	2772	2892
Total live births in Brandenburg	18954	18279	18482	18355	19339	19112	20934	20337	19881	19329	18998	19029	17439	15885	15154
Live births with non-German mother % of all live births in Brandenburg	0.0480637	0.0489086	0.050698	0.0582947	0.0583277	0.069956	0.116175	0.111078	0.122127	0.127425	0.128119	0.12996	0.152818	0.174504	0.190841
Fertility rate adjustment factor	1.57782	1.48378	1.4053	1.43698	1.2941	1.29657	1.87281	1.65636	1.64309	1.58749	1.53069	1.43364	1.25724	1.36379	1.47919
Fertility adjusted haemoglobinopathy carriage rate, significant variants	0.00163047	0.00163261	0.00162434	0.00177372	0.00174951	0.00219273	0.00362456	0.00358128	0.00391252	0.00411626	0.0040557	0.00410676	0.00394705	0.00476513	0.00549333
Fertility adjusted haemoglobinopathy carriage rate, all variants	0.00512757	0.00518392	0.00522343	0.0057558	0.00563286	0.00679172	0.0109336	0.0108868	0.0121996	0.013183	0.0131971	0.0135428	0.0133793	0.0166214	0.0199479
Fertility adjusted haemoglobinopathy carriage rate (country weighted), significant variants	0.00176112	0.00177043	0.00178013	0.0019517	0.00196442	0.00255519	0.00438513	0.0044574	0.00492448	0.00518169	0.005097	0.00518255	0.00497086	0.00613665	0.00720742
Fertility adjusted haemoglobinopathy carriage rate (country weighted), all variants	0.00572575	0.00582283	0.00592657	0.0065492	0.00651427	0.0081135	0.0135891	0.0138247	0.0156112	0.0168327	0.0168186	0.017432	0.0172032	0.021706	0.0263255
CF: haemoglobinopathies carrier frequency in pregnancies; SV: only significant variants; AV: any variant; TFR (2023): total fertility rate as published for the year 2023; Cw FRF: country-specific fertility-rate weighting factor
[truncated: 43 more columns]

## Sheet: S6
Bremen	2010	2011	2012	2013	2014	2015	2016	2017	2018	2019	2020	2021	2022	2023	2024	TFR 2023	Cw FRF 20203	CF any alpha variant	CF A/ß-Thal.	CF A/HbC	CF A/HbS	CF A/HbE	CF other beta variants	CF any beta variant	CF, SV (a/b coincidence)	CF, AV (a/b coincidence)		significant variants	2010	2011	2012	2013	2014	2015	2016	2017	2018	2019	2020	2021	2022	2023	2024		all variants	2010	2011	2012	2013
Afghanistan	77	94	112	139	153	216	540	595	670	705	745	865	1040	1185	1255	4.84	2.44198	0.151944	0.03				0.0003	0.0303	0.0303	0.182244		Afghanistan	2.41233e-05	2.62801e-05	3.12152e-05	4.02764e-05	4.0623e-05	6.00202e-05	0.00017504	0.000178561	0.000201767	0.000217678	0.000231981	0.000255855	0.000300718	0.000337904	0.000355672		Afghanistan	0.000145093	0.000158066	0.000187749	0.000242248
Egypt	31	33	34	41	58	66	80	95	125	130	135	150	185	180	205	2.75	1.38749	0.161989	0.02		0.002		0.0003	0.0223	0.0223	0.184289		Egypt	7.14776e-06	6.7901e-06	6.97412e-06	8.74342e-06	1.13337e-05	1.34974e-05	1.90852e-05	2.09824e-05	2.77043e-05	2.95414e-05	3.09379e-05	3.26536e-05	3.93695e-05	3.77755e-05	4.27585e-05		Egypt	5.90698e-05	5.6114e-05	5.76349e-05	7.22565e-05
Albania	59	61	68	75	133	323	285	320	380	460	555	700	770	805	815	1.348	0.680121	0.0879363	0.05	0	0.03	0	0.0003	0.0803	0.0803	0.168236		Albania	4.89859e-05	4.51963e-05	5.02262e-05	5.7593e-05	9.35847e-05	0.000237859	0.000244829	0.000254503	0.000303272	0.000376406	0.000457995	0.000548717	0.000590051	0.000608337	0.000612121		Albania	0.00010263	9.46906e-05	0.000105229	0.000120663
Algeria	52	55	60	69	63	66	55	65	65	75	70	65	75	85	120	2.766	1.39556	0.346633	0.035	0.012	0.009		0.0003	0.0563	0.0563	0.402933		Algeria	3.02702e-05	2.85712e-05	3.10717e-05	3.71493e-05	3.10804e-05	3.40764e-05	3.31263e-05	3.62451e-05	3.6371e-05	4.30281e-05	4.05004e-05	3.57237e-05	4.02951e-05	4.5036e-05	6.31907e-05		Algeria	0.00021664	0.000204481	0.000222377	0.000265873
Andorra	0	0	0	0	0	0	0	0	0	0	0	0	0	0	0	1.082	0.545913	0	0.001				0.0003	0.0013	0.0013	0.0013		Andorra	0	0	0	0	0	0	0	0	0	0	0	0	0	0	0		Andorra	0	0	0	0
Angola	23	23	19	16	14	13	0	0	0	0	0	0	0	0	5	5.124	2.58527	0.406157	0.00075		0.247		0.0003	0.24805	0.24805	0.654207		Angola	5.89889e-05	5.2641e-05	4.3351e-05	3.79535e-05	3.04302e-05	2.95722e-05	0	0	0	0	0	0	0	0	1.16004e-05		Angola	0.000155577	0.000138835	0.000114334	0.000100099
Antigua and Barbuda	0	0	0	0	0	0	0	0	0	0	0	0	0	0	0	1.578	0.796165	0.213231	0.01	0.02	0.1		0.0003	0.1303	0.1303	0.343531		Antigua and Barbuda	0	0	0	0	0	0	0	0	0	0	0	0	0	0	0		Antigua and Barbuda	0	0	0	0
Equatorial Guinea	0	0	0	0	0	0	0	0	0	0	0	0	0	0	0	4.081	2.05903	0.4071	0.00075		0.2		0.0003	0.20105	0.20105	0.60815		Equatorial Guinea	0	0	0	0	0	0	0	0	0	0	0	0	0	0	0		Equatorial Guinea	0	0	0	0
Argentina	11	10	12	18	19	15	5	5	0	5	0	0	15	20	30	1.5	0.756811	0.0218768	0.01				0.0003	0.0103	0.0103	0.0321768		Argentina	1.17148e-06	9.50374e-07	1.13691e-06	1.77297e-06	1.71486e-06	1.41687e-06	5.50946e-07	5.10076e-07	0	5.24796e-07	0	0	1.47439e-06	1.93865e-06	2.89016e-06		Argentina	3.65965e-06	2.96893e-06	3.55165e-06	5.53871e-06
Armenia	50	50	53	58	71	84	95	110	110	90	90	100	115	125	135	1.9	0.958628	0.019899	0.02				0.0003	0.0203	0.0203	0.040199		Armenia	1.04947e-05	9.36533e-06	9.89641e-06	1.12594e-05	1.26297e-05	1.56378e-05	2.06311e-05	2.21165e-05	2.21933e-05	1.86175e-05	1.87755e-05	1.98167e-05	2.2278e-05	2.38802e-05	2.56327e-05		Armenia	2.07821e-05	1.85457e-05	1.95973e-05	2.22965e-05
Azerbaijan	22	22	23	19	21	30	15	20	20	30	40	45	60	70	65	1.55	0.782038	0.316272	0.054		0.006		0.0003	0.0603	0.0603	0.376572		Azerbaijan	1.37165e-05	1.22404e-05	1.27571e-05	1.09563e-05	1.10962e-05	1.65897e-05	9.67632e-06	1.19447e-05	1.19862e-05	1.84341e-05	2.47873e-05	2.6489e-05	3.45264e-05	3.97235e-05	3.66602e-05		Azerbaijan	8.56593e-05	7.64413e-05	7.96677e-05	6.84218e-05
Ethiopia	16	17	20	24	24	20	10	15	20	35	25	15	5	10	10	3.989	2.01261	0.0198931	0.005	0	0.001		0.0003	0.0063	0.0063	0.0261931		Ethiopia	1.04223e-06	9.88204e-07	1.15898e-06	1.44592e-06	1.32492e-06	1.1555e-06	6.73973e-07	9.35964e-07	1.25229e-06	2.24694e-06	1.61858e-06	9.22501e-07	3.00603e-07	5.92889e-07	5.89257e-07		Ethiopia	4.33321e-06	4.10859e-06	4.81861e-06	6.0116e-06
Australia	40	35	35	33	40	35	20	30	30	20	20	20	15	5	10	1.5	0.756811	0.0363039	0.00425757	8.18525e-05	0.00113573	0.00433954	5.97528e-05	0.00987444	0.0122397	0.0461784		Australia	5.06214e-06	3.95272e-06	3.94044e-06	3.86258e-06	4.29011e-06	3.92862e-06	2.6188e-06	3.6368e-06	3.64943e-06	2.4945e-06	2.51567e-06	2.38966e-06	1.75204e-06	5.75935e-07	1.14481e-06		Australia	1.90986e-05	1.4913e-05	1.48666e-05	1.45729e-05
Bahamas	0	0	0	0	0	0	0	0	0	0	0	0	0	0	0	1.373	0.692735	0.291373	0.01	0.03	0.14		0.0003	0.1803	0.1803	0.471673		Bahamas	0	0	0	0	0	0	0	0	0	0	0	0	0	0	0		Bahamas	0	0	0	0
Bahrain	2	2	2	1	1	2	0	0	0	0	0	0	0	0	0	1.824	0.920283	0.554856	0.029		0.138		0.0003	0.1673	0.167766	0.722156		Bahrain	3.46926e-06	3.09593e-06	3.08631e-06	1.60434e-06	1.47008e-06	3.07705e-06	0	0	0	0	0	0	0	0	0		Bahrain	1.49336e-05	1.33266e-05	1.32852e-05	6.90596e-06
Bangladesh	13	16	14	16	18	24	15	20	20	20	30	35	45	50	70	2.163	1.09132	0.495591	0.025			0.04	0.0003	0.0653	0.0653	0.560891		Bangladesh	8.77728e-06	9.64029e-06	8.40905e-06	9.99139e-06	1.02997e-05	1.43723e-05	1.04787e-05	1.29351e-05	1.298e-05	1.33084e-05	2.0132e-05	2.23109e-05	2.8042e-05	3.07267e-05	4.27538e-05		Bangladesh	7.5392e-05	8.28048e-05	7.22291e-05	8.58205e-05
Barbados	0	0	0	0	0	0	0	0	0	0	0	0	0	0	0	1.708	0.861756	0.151943	0.005	0.046	0.07		0.0003	0.1213	0.1213	0.273243		Barbados	0	0	0	0	0	0	0	0	0	0	0	0	0	0	0		Barbados	0	0	0	0
Belarus	147	133	126	135	136	147	135	170	155	140	155	150	165	165	150	1.208	0.609485	0	0.001				0.0003	0.0013	0.0013	0.0013		Belarus	1.9759e-06	1.59534e-06	1.50668e-06	1.6783e-06	1.54924e-06	1.75251e-06	1.8775e-06	2.18887e-06	2.00266e-06	1.85462e-06	2.07075e-06	1.90357e-06	2.04696e-06	2.01864e-06	1.82389e-06		Belarus	1.9759e-06	1.59534e-06	1.50668e-06	1.6783e-06
Belgium	42	38	38	41	52	48	35	40	30	35	40	25	35	60	60	1.47	0.741675	0.027938	0.00335428	0.000486604	0.00568933	0.000388821	0.0003	0.010219	0.0103997	0.0381571		Belgium	4.5162e-06	3.64638e-06	3.63505e-06	4.07753e-06	4.73873e-06	4.57786e-06	3.89395e-06	4.1201e-06	3.10081e-06	3.70913e-06	4.27497e-06	2.53802e-06	3.47354e-06	5.87225e-06	5.83628e-06		Belgium	1.65702e-05	1.33788e-05	1.33372e-05	1.49607e-05
Belize	0	0	0	0	0	0	0	0	0	0	0	0	0	0	0	2.007	1.01261	0.109808	0.00075	0.01	0.05		0.0003	0.06105	0.06105	0.170858		Belize	0	0	0	0	0	0	0	0	0	0	0	0	0	0	0		Belize	0	0	0	0
Benin	6	6	7	7	7	7	0	0	0	0	0	0	0	0	0	4.556	2.29869	0.406157	0.002	0.102	0.228		0.0003	0.3323	0.3323	0.738457		Benin	2.06151e-05	1.83966e-05	2.13961e-05	2.22444e-05	2.03829e-05	2.13319e-05	0	0	0	0	0	0	0	0	0		Benin	4.5812e-05	4.08821e-05	4.75476e-05	4.94329e-05
Bhutan	0	0	0	0	0	1	0	0	0	0	0	0	0	0	0	1.462	0.737639	0.95976	0.00075			0.04	0.0003	0.04105	0.04105	1.00081		Bhutan	0	0	0	0	0	3.76456e-07	0	0	0	0	0	0	0	0	0		Bhutan	0	0	0	0
Bolivia, Plurinational State of	9	7	4	4	5	5	0	0	0	5	0	0	0	5	5	2.547	1.28507	0.0590913	0.02				0.0003	0.0203	0.0203	0.0793913		Bolivia, Plurinational State of	1.88904e-06	1.31115e-06	7.46899e-07	7.76513e-07	8.89414e-07	9.30822e-07	0	0	0	1.03431e-06	0	0	0	9.55209e-07	9.49358e-07		Bolivia, Plurinational State of	7.38786e-06	5.12776e-06	2.92105e-06	3.03686e-06
Bosnia and Herzegovina	317	308	295	287	292	293	345	335	370	355	375	400	400	430	420	1.486	0.749748	0.0198911	0.015				0.0003	0.0153	0.0153	0.0351911		Bosnia and Herzegovina	5.0148e-05	4.3481e-05	4.15164e-05	4.19919e-05	3.91482e-05	4.11112e-05	5.64693e-05	5.07649e-05	5.62634e-05	5.53481e-05	5.89624e-05	5.97429e-05	5.84029e-05	6.19145e-05	6.01042e-05		Bosnia and Herzegovina	0.000115344	0.000100009	9.54906e-05	9.65845e-05
Botswana	0	0	0	0	1	1	0	0	0	0	0	0	0	0	0	2.732	1.37841	0.124804	0.00075		0		0.0003	0.00105	0.00105	0.125854		Botswana	0	0	0	0	9.20083e-09	9.6292e-09	0	0	0	0	0	0	0	0	0		Botswana	0	0	0	0
Brazil	237	234	236	250	252	261	265	250	255	255	250	260	270	270	285	1.619	0.816852	0.0596709	0.01	0.00616	0.02684		0.0003	0.0433	0.0433	0.102971		Brazil	0.000106106	9.34891e-05	9.39952e-05	0.000103519	9.5615e-05	0.00010364	0.000122754	0.000107215	0.000109739	0.000112515	0.000111245	0.0001099	0.000111567	0.000110023	0.000115424		Brazil	0.000252328	0.000222325	0.000223528	0.000246177
British Overseas Territories	0	0	0	0	0	0	0	0	0	0	0	0	0	0	0	n.a.		0.172628	0.01	0.02	0.08		0.0003	0.1103	0.1103	0.282928		British Overseas Territories	0	0	0	0	0	0	0	0	0	0	0	0	0	0	0		British Overseas Territories	0	0	0	0
Brunei Darussalam	0	0	0	0	0	0	0	0	0	0	0	0	0	0	0	1.747	0.881433	0.2431	0.03			0.01	0.0003	0.0403	0.0403	0.2834		Brunei Darussalam	0	0	0	0	0	0	0	0	0	0	0	0	0	0	0		Brunei Darussalam	0	0	0	0
Bulgaria	782	908	1180	1404	1796	2349	2380	2505	2730	2840	2860	2910	2920	2920	2920	1.81	0.913219	0	0.03				0.0003	0.0303	0.0303	0.0303		Bulgaria	0.000244992	0.000253855	0.000328875	0.00040682	0.000476855	0.000652719	0.000771474	0.000751758	0.000822126	0.000876888	0.000890556	0.000860738	0.000844323	0.000832641	0.000827541		Bulgaria	0.000244992	0.000253855	0.000328875	0.00040682
Burkina Faso	2	3	3	4	1	3	0	0	0	0	0	0	0	0	0	4.186	2.11201	0.405591	0.012	0.167	0.086		0.0003	0.2653	0.2653	0.670891		Burkina Faso	5.48619e-06	7.34371e-06	7.3209e-06	1.01482e-05	2.32474e-06	7.29893e-06	0	0	0	0	0	0	0	0	0		Burkina Faso	1.38735e-05	1.85708e-05	1.85131e-05	2.56628e-05
Burundi	0	0	1	0	0	0	0	0	0	0	0	0	0	0	0	4.878	2.46115	0.382204	0.00075		0.189		0.0003	0.19005	0.19005	0.572254		Burundi	0	0	1.74813e-06	0	0	0	0	0	0	0	0	0	0	0	0		Burundi	0	0	5.26374e-06	0
Cape Verde	5	4	3	3	4	3	0	0	0	0	0	0	0	0	0	1.522	0.767911	0.36	0.00075		0.042		0.0003	0.04305	0.04305	0.40305		Cape Verde	2.2256e-06	1.58888e-06	1.18796e-06	1.23506e-06	1.50894e-06	1.18439e-06	0	0	0	0	0	0	0	0	0		Cape Verde	2.08369e-05	1.48757e-05	1.11221e-05	1.15631e-05
Chile	32	31	30	35	34	37	25	25	30	35	35	30	40	40	40	1.167	0.588799	0.0198931	0.01				0.0003	0.0103	0.0103	0.0301931		Chile	3.40793e-06	2.94616e-06	2.84226e-06	3.44745e-06	3.0687e-06	3.49494e-06	2.75473e-06	2.55038e-06	3.07108e-06	3.67357e-06	3.70474e-06	3.01643e-06	3.9317e-06	3.8773e-06	3.85355e-06		Chile	9.98989e-06	8.63627e-06	8.33171e-06	1.01057e-05
China	461	482	500	549	583	592	610	620	610	635	625	630	605	590	600	0.999	0.504036	0.112521	0.0101174	0	0	0.000210548	0.0003	0.010628	0.0241609	0.123149		China	0.000115164	0.000107453	0.000111119	0.000126846	0.000123429	0.00013117	0.000157668	0.000148365	0.000146479	0.00015634	0.000155183	0.00014859	0.000139493	0.000134152	0.00013559		China	0.000586994	0.000547689	0.000566377	0.000646539
Costa Rica	3	2	4	3	5	5	0	0	0	0	0	0	0	0	0	1.33	0.671039	0.0446649	0.00075	0.002	0.02		0.0003	0.02305	0.02305	0.0677149		Costa Rica	7.14983e-07	4.25361e-07	8.4808e-07	6.61279e-07	1.0099e-06	1.05692e-06	0	0	0	0	0	0	0	0	0		Costa Rica	2.10043e-06	1.2496e-06	2.49144e-06	1.94267e-06
Côte d'Ivoire	26	23	23	24	22	24	25	10	20	25	30	45	40	60	80	4.283	2.16095	0.389764	0.039	0.063	0.084		0.0003	0.1863	0.1863	0.576064		Côte d'Ivoire	5.00829e-05	3.95365e-05	3.94136e-05	4.27579e-05	3.59148e-05	4.10039e-05	4.98258e-05	1.84519e-05	3.70319e-05	4.74609e-05	5.74363e-05	8.1839e-05	7.11141e-05	0.000105195	0.000139401		Côte d'Ivoire	0.000154863	0.000122252	0.000121872	0.000132213
Denmark	55	56	68	70	80	68	45	45	40	30	35	25	35	30	25	1.5	0.756811		0.00225396	8.50554e-05	0.000687419	0.000628425	0.0003	0.00395486	0.00417812	0.00395486		Denmark	2.376e-06	2.15887e-06	2.61334e-06	2.79687e-06	2.92893e-06	2.6055e-06	2.01139e-06	1.86218e-06	1.66102e-06	1.27728e-06	1.5028e-06	1.01966e-06	1.39551e-06	1.1796e-06	9.76979e-07		Denmark	2.24904e-06	2.04351e-06	2.4737e-06	2.64742e-06
Dominica	0	0	0	0	0	0	0	0	0	0	0	0	0	0	0	1.484	0.748739	0.328911	0.0075	0.015	0.16		0.0003	0.1828	0.1828	0.511711		Dominica	0	0	0	0	0	0	0	0	0	0	0	0	0	0	0		Dominica	0	0	0	0
Dominican Republic	46	49	47	51	52	58	50	40	50	55	60	60	60	50	40	2.243	1.13169	0.252813	0.01	0.03	0.12		0.0003	0.1603	0.1603	0.413113		Dominican Republic	7.62421e-05	7.24748e-05	6.93006e-05	7.81801e-05	7.30423e-05	8.52633e-05	8.57443e-05	6.35069e-05	7.96593e-05	8.9842e-05	9.88411e-05	9.38901e-05	9.17842e-05	7.54286e-05	5.99732e-05		Dominican Republic	0.000196485	0.000186776	0.000178596	0.00020148
Djibouti	0	0	0	0	0	0	0	0	0	0	0	0	0	0	0	2.609	1.31635	0.0196773	0.00075				0.0003	0.00105	0.00105	0.0207273		Djibouti	0	0	0	0	0	0	0	0	0	0	0	0	0	0	0		Djibouti	0	0	0	0
Ecuador	22	21	22	36	33	31	5	5	10	10	5	5	20	20	15	1.823	0.919778	0.0224466	0.01		0.01		0.0003	0.0203	0.0203	0.0427466		Ecuador	4.61766e-06	3.93344e-06	4.10794e-06	6.98862e-06	5.87013e-06	5.7711e-06	1.08584e-06	1.0053e-06	2.01757e-06	2.06861e-06	1.04308e-06	9.90835e-07	3.87444e-06	3.82084e-06	2.84807e-06		Ecuador	9.72361e-06	8.28282e-06	8.65028e-06	1.47162e-05
El Salvador	4	4	6	6	7	11	5	5	5	5	5	5	5	0	0	1.775	0.89556	0.0340384	0.00075		0.0152		0.0003	0.01625	0.01625	0.0502884		El Salvador	6.72073e-07	5.9975e-07	8.96831e-07	9.32389e-07	9.96757e-07	1.63926e-06	8.69211e-07	8.04731e-07	8.07526e-07	8.27954e-07	8.3498e-07	7.93156e-07	7.75365e-07	0	0		El Salvador	2.07985e-06	1.85603e-06	2.7754e-06	2.88544e-06
Eritrea	3	3	4	4	16	35	85	90	115	120	130	160	190	185	215	3.713	1.87336	0.0198931	0.005		0.001		0.0003	0.0063	0.0063	0.0261931		Eritrea	1.95418e-07	1.74389e-07	2.31796e-07	2.40987e-07	8.8328e-07	2.02213e-06	5.72877e-06	5.61579e-06	7.20065e-06	7.7038e-06	8.4166e-06	9.84001e-06	1.14229e-05	1.09684e-05	1.2669e-05		Eritrea	8.12477e-07	7.25045e-07	9.63723e-07	1.00193e-06
Estonia	19	23	28	33	35	36	25	20	20	20	15	15	20	10	5	1.31	0.660949	0	0.001				0.0003	0.0013	0.0013	0.0013		Estonia	2.55388e-07	2.75885e-07	3.34817e-07	4.10251e-07	3.98703e-07	4.29187e-07	3.47684e-07	2.57514e-07	2.58408e-07	2.64945e-07	2.00395e-07	1.90357e-07	2.48117e-07	1.22342e-07	6.07963e-08		Estonia	2.55388e-07	2.75885e-07	3.34817e-07	4.10251e-07
Eswatini	0	0	0	0	0	0	0	0	0	0	0	0	0	0	0	2.753	1.389	0.125125	0.00075		0.005		0.0003	0.00605	0.00605	0.131175		Eswatini	0	0	0	0	0	0	0	0	0	0	0	0	0	0	0		Eswatini	0	0	0	0
Fiji	1	1	1	1	1	1	0	0	0	0	0	0	0	0	0	2.281	1.15086	0.351975	0.00075				0.0003	0.00105	0.00105	0.353025		Fiji	1.08566e-08	9.68827e-09	9.65818e-09	1.00411e-08	9.20083e-09	9.6292e-09	0	0	0	0	0	0	0	0	0		Fiji	3.65013e-06	3.25734e-06	3.24722e-06	3.37597e-06
Finland	46	45	48	55	65	61	45	45	55	45	30	30	25	35	30	1.26	0.635721	0.00254627	0.00132379	3.54355e-05	0.000261161	0.000288624	0.0003	0.00220901	0.00232607	0.00475527		Finland	1.10633e-06	9.65813e-07	1.027e-06	1.22343e-06	1.32487e-06	1.30123e-06	1.11979e-06	1.03672e-06	1.27151e-06	1.06664e-06	7.17129e-07	6.81208e-07	5.5494e-07	7.66168e-07	6.52692e-07		Finland	2.26171e-06	1.97445e-06	2.09953e-06	2.5011e-06
France	333	352	388	446	475	396	430	410	405	410	370	335	340	340	305	1.66	0.837538	0.0311626	0.00305514	0.000636213	0.00540286	0.00145195	0.0003	0.0108462	0.0110525	0.0420087		France	3.80547e-05	3.58972e-05	3.94455e-05	4.71398e-05	4.60036e-05	4.01381e-05	5.08429e-05	4.4882e-05	4.44886e-05	4.61772e-05	4.20257e-05	3.61443e-05	3.5861e-05	3.53648e-05	3.153e-05		France	0.00014464	0.000136439	0.000149926	0.000179171
Gabon	5	5	3	5	5	6	0	0	0	0	0	0	0	0	0	3.647	1.84006	0.6864	0.00075	0.001	0.252		0.0003	0.25405	0.25405	0.94045		Gabon	1.31339e-05	1.17205e-05	7.01046e-06	1.21474e-05	1.11308e-05	1.39788e-05	0	0	0	0	0	0	0	0	0		Gabon	4.86193e-05	4.33873e-05	2.59515e-05	4.49675e-05
Gambia	53	54	54	58	70	70	70	70	60	90	95	100	115	140	155	4.006	2.02119	0.389764	0.00075	0.016	0.136		0.0003	0.15305	0.15305	0.542814		Gambia	8.38711e-05	7.62578e-05	7.60209e-05	8.48895e-05	9.38792e-05	9.82499e-05	0.000114613	0.000106111	9.12678e-05	0.000140365	0.00014942	0.000149406	0.000167963	0.000201648	0.000221885		Gambia	0.000297461	0.000270459	0.000269619	0.000301073
Georgia	90	94	98	109	112	124	105	125	140	135	140	165	210	210	200	1.81	0.913219	0.019899	0.03				0.0003	0.0303	0.0303	0.050199		Georgia	2.81961e-05	2.62801e-05	2.73133e-05	3.15836e-05	2.97371e-05	3.4456e-05	3.40356e-05	3.75129e-05	4.21603e-05	4.1683e-05	4.35937e-05	4.88047e-05	6.07218e-05	5.98817e-05	5.66809e-05		Georgia	4.67133e-05	4.35392e-05	4.52509e-05	5.23256e-05
Ghana	388	369	371	397	416	459	495	560	650	775	900	1010	1105	1150	1150	3.397	1.71393	0.405968	0.003	0.112	0.158		0.0003	0.2733	0.2733	0.679268		Ghana	0.00109641	0.000930514	0.000932651	0.00103758	0.000996256	0.00115041	0.00144726	0.00151585	0.00176557	0.00215836	0.00252775	0.00269461	0.00288194	0.00295781	0.00293969		Ghana	0.00272506	0.00231273	0.00231804	0.00257884
Grenada	1	1	1	1	1	0	0	0	0	0	0	0	0	0	0	1.487	0.750252	0.213231	0.01	0.02	0.1		0.0003	0.1303	0.1303	0.343531		Grenada	1.34725e-06	1.20227e-06	1.19853e-06	1.24605e-06	1.14178e-06	0	0	0	0	0	0	0	0	0	0		Grenada	3.55197e-06	3.16974e-06	3.15989e-06	3.28518e-06
Greece	267	282	297	348	419	631	500	470	475	485	460	490	460	485	495	1.32	0.665994	0.00957832	0.00468454	2.35023e-05	0.00245686	4.03832e-05	3.20226e-05	0.0072373	0.00727335	0.0168156		Greece	2.00793e-05	1.89252e-05	1.98699e-05	2.42051e-05	2.67046e-05	4.20886e-05	3.89051e-05	3.38579e-05	3.43369e-05	3.59467e-05	3.43831e-05	3.47909e-05	3.19283e-05	3.31978e-05	3.36747e-05		Greece	4.64224e-05	4.37541e-05	4.59383e-05	5.59609e-05
Guatemala	3	5	4	7	4	2	0	0	0	0	0	0	0	0	0	2.311	1.16599	0.0336926	0.00075				0.0003	0.00105	0.00105	0.0347426		Guatemala	3.25697e-08	4.84414e-08	3.86327e-08	7.02878e-08	3.68033e-08	1.92584e-08	0	0	0	0	0	0	0	0	0		Guatemala	1.07767e-06	1.60284e-06	1.27829e-06	2.3257e-06
Guinea	7	9	10	18	24	35	35	50	60	75	80	95	115	135	155	4.217	2.12765	0.405205	0.00075		0.227		0.0003	0.22805	0.22805	0.633255		Guinea	1.65056e-05	1.89378e-05	2.09766e-05	3.9255e-05	4.796e-05	7.31979e-05	8.53886e-05	0.000112935	0.000135992	0.000174291	0.000187488	0.00021149	0.000250271	0.000289732	0.000330617		Guinea	4.58332e-05	5.2587e-05	5.82485e-05	0.000109004
Guinea-Bissau	2	1	1	1	1	3	0	0	0	0	0	0	0	0	0	3.836	1.93542	0.405205	0.00075	0.002	0.076		0.0003	0.07905	0.07905	0.484255		Guinea-Bissau	1.63469e-06	7.29389e-07	7.27123e-07	7.55953e-07	6.92691e-07	2.17482e-06	0	0	0	0	0	0	0	0	0		Guinea-Bissau	1.0014e-05	4.46819e-06	4.4543e-06	4.63092e-06
Guyana	0	0	0	0	1	1	0	0	0	0	0	0	0	0	0	2.412	1.21695	0.109685	0.00075	0.01	0.05		0.0003	0.06105	0.06105	0.170735		Guyana	0	0	0	0	5.34963e-07	5.59869e-07	0	0	0	0	0	0	0	0	0		Guyana	0	0	0	0
[truncated: 162 more rows]
[truncated: 43 more columns]

## Sheet: S7
Hamburg	2010	2011	2012	2013	2014	2015	2016	2017	2018	2019	2020	2021	2022	2023	2024	TFR 2023	Cw FRF 20203	CF any alpha variant	CF A/ß-Thal.	CF A/HbC	CF A/HbS	CF A/HbE	CF other beta variants	CF any beta variant	CF, SV (a/b coincidence)	CF, AV (a/b coincidence)		significant variants	2010	2011	2012	2013	2014	2015	2016	2017	2018	2019	2020	2021	2022	2023	2024		all variants	2010	2011	2012	2013
[truncated: 220 more rows]
[truncated: 43 more columns]

[truncated: 17 more sheets: S8, S9, S10, S11, S12, S13, S14, S15, S16, S17, S18, S19, S20, S21, S22, S23, S24]
